# Supplementary material
Source: PubMed Central journal article supplement (PMC5192798)
Supplement: MILQ-94-862-s001.pdf [file MILQ-94-862-s001.pdf]

PubMed Search: FINAL SEARCH STRATEGY (03 JUNE 2014)

N = 8,095 records

Note: filters other than language or date will exclude records in process; source <http://www.lib.berkeley.edu/BIOS/pubquick.html>

#### #1 CONSTRUCT SEARCH

(((((("Continuity of Patient Care" [MeSH]) OR ("Continuity of care"[tiab] OR "Continuity of patient care"[tiab] OR "patient care continuity"[tiab] OR "Care continuity"[tiab] OR "Healthcare continuity"[tiab] OR "health care continuity"[tiab] OR "Service continuity"[tiab] OR "comprehensive care"[tiab] OR "comprehensive health care"[tiab] OR "comprehensive healthcare"[tiab] OR "comprehensive health services"[tiab] OR "comprehensive health service"[tiab] OR "comprehensive service"[tiab] OR "comprehensive services"[tiab] OR "comprehensive patient care"[tiab])))) OR (("Case Management" [MeSH]) OR ("coordination of care"[tiab] OR "care coordination"[tiab] OR "Healthcare coordination"[tiab] OR "health care coordination"[tiab] OR "Service coordination"[tiab] OR "Services coordination"[tiab] OR "Service co-ordination"[tiab] OR "Coordinated care"[tiab] OR "Coordinated health care"[tiab] OR "Coordinated healthcare"[tiab] OR "Coordinated patient care"[tiab] OR "Coordinated service"[tiab] OR "Coordinated services"[tiab] OR "Co-ordinated care"[tiab] OR "Co-ordinated service"[tiab] OR "Co-ordinated services"[tiab] OR "Coordinating care"[tiab] OR "Coordinating health care"[tiab] OR "Coordinating patient care"[tiab] OR "Coordinating service"[tiab] OR "Coordinating services"[tiab] OR "Co-ordinating care"[tiab] OR "Co-ordinating health care"[tiab] OR "Co-ordinating services"[tiab] OR "Co-ordinating services"[tiab])))) OR (((("Delivery of Health Care, Integrated" [MeSH]) OR ("Integration of care"[tiab] OR "Integration of health care"[tiab] OR "Integration of healthcare"[tiab] OR "Integration of patient care"[tiab] OR "Integration of service"[tiab] OR "Integration of services"[tiab] OR "Care integration"[tiab] OR "Healthcare integration"[tiab] OR "health care integration"[tiab] OR "Service integration"[tiab] OR "Services integration"[tiab] OR "Integrated care"[tiab] OR "Integrated health care"[tiab] OR "Integrated healthcare"[tiab] OR "Integrated patient care"[tiab] OR "Integrated service"[tiab] OR "Integrated services"[tiab] OR "Integrating care"[tiab] OR "Integrating health care"[tiab] OR "Integrating healthcare"[tiab] OR "Integrating patient care"[tiab] OR "Integrating services"[tiab] OR "Integrating services"[tiab] OR "health care system integration"[tiab] OR "health system integration"[tiab] OR "horizontal integration"[tiab] OR "vertical integration"[tiab] OR "organizational integration"[tiab] OR "professional integration"[tiab] OR "clinical integration"[tiab])))) OR (((("Continuity of Patient Care" [MeSH]) OR ("continuum of care"[tiab] OR "care continuum"[tiab] OR "continuum of services"[tiab] OR "continuum of service"[tiab] OR "service continuum"[tiab] OR "services continuum"[tiab] OR "comprehensive care"[tiab] OR "comprehensive health care"[tiab] OR "comprehensive healthcare"[tiab] OR "comprehensive health services"[tiab] OR "comprehensive health service"[tiab] OR "comprehensive service"[tiab] OR "comprehensive services"[tiab] OR "comprehensive patient care"[tiab])))) OR (((("Patient-Centered Care" [MeSH]) OR ("Patient centered care"[tiab] OR "Patient centered health care"[tiab] OR "Patient centered healthcare"[tiab] OR "Patient centred services"[tiab] OR "Patient centered service"[tiab] OR "Patient centred health care"[tiab] OR "Patient centred healthcare"[tiab] OR "Patient centred service"[tiab] OR "Patient centred services"[tiab] OR "Patient focused care"[tiab] OR "Patient focused health care"[tiab] OR "Patient focused healthcare"[tiab] OR "Patient focused service"[tiab] OR "Patient focused services"[tiab] OR "population focused care"[tiab] OR "population based care"[tiab] OR "population based health care"[tiab] OR "population based healthcare"[tiab] OR "population based services"[tiab])))) OR ((("Case Management" [MeSH]) OR "Case management"[tiab]))))

**AND**

#### #2 INSTRUMENT SEARCH

(((((("Questionnaires"[Mesh]) OR "Questionnaires/methods"[Mesh]) OR "Questionnaires/standards"[Mesh]) OR "Questionnaires/statistics and numerical data"[Mesh])) OR questionnaire[tiab] OR assess[tiab] OR measure[tiab] OR survey[tiab] OR test[tiab] OR "survey instrument"[tiab]))

**AND**

#### #3 SEARCH FILTER FOR MEASUREMENT PROPERTIES

((("Validation Studies as Topic" [MeSH]) OR ((instrumentation[sh] OR methods[sh] OR Validation Studies[pt] OR Comparative Study[pt] OR "psychometrics"[MeSH] OR psychometr[tiab] OR clinimetr[tw] OR clinometr[tw] OR "observer variation"[MeSH] OR observer variation[tiab] OR "Delivery of Health Care, Integrated"[Mesh] OR "reproducibility of results"[MeSH] OR reproducib[tiab] OR "discriminant analysis"[MeSH] OR reliab[tiab] OR unreliab[tiab] OR valid[tiab] OR coefficient[tiab] OR homogeneity[tiab] OR homogeneous[tiab] OR "internal consistency"[tiab] OR (cronbach[tiab] AND (alpha[tiab] OR alphas[tiab])) OR (item[tiab] AND (correlation[tiab] OR selection[tiab] OR reduction[tiab])) OR agreement[tiab] OR precision[tiab] OR imprecision[tiab] OR "precise values"[tiab] OR test-retest[tiab] OR (test[tiab] AND retest[tiab]) OR (reliab[tiab] AND (test[tiab] OR retest[tiab])) OR stability[tiab] OR interrater[tiab] OR inter-rater[tiab] OR intrarater[tiab] OR intra-rater[tiab] OR intertester[tiab] OR inter-tester[tiab] OR intratester[tiab] OR intra-tester[tiab] OR interobserver[tiab] OR inter-observer[tiab] OR intraobserver[tiab] OR intraobserver[tiab] OR intertechnician[tiab] OR inter-technician[tiab] OR intratechnician[tiab] OR intra-technician[tiab] OR interexaminer[tiab] OR inter-examiner[tiab] OR intraexaminer[tiab] OR intra-examiner[tiab] OR interassay[tiab] OR inter-assay[tiab] OR intraassay[tiab] OR intra-assay[tiab] OR interindividual[tiab] OR inter-individual[tiab] OR intraindividual[tiab] OR intra-individual[tiab] OR interparticipant[tiab] OR interparticipant[tiab] OR intraparticipant[tiab] OR intra-participant[tiab] OR kappa[tiab] OR kappa's[tiab] OR kappas[tiab] OR repeatab[tiab] OR ((replicab[tiab] OR repeated[tiab]) AND (measure[tiab] OR measures[tiab] OR findings[tiab] OR result[tiab] OR results[tiab] OR test[tiab] OR tests[tiab])) OR generaliza[tiab] OR generalisa[tiab] OR concordance[tiab] OR (intraclass[tiab] AND correlation[tiab]) OR discriminative[tiab] OR "known group"[tiab] OR factor analysis[tiab] OR factor analyses[tiab] OR dimension[tiab] OR subscale[tiab] OR (multitrait[tiab] AND scaling[tiab] AND (analysis[tiab] OR analyses[tiab])) OR item discriminant[tiab] OR interscale correlation[tiab] OR error[tiab] OR errors[tiab] OR "individual variability"[tiab] OR (variability[tiab] AND (analysis[tiab] OR values[tiab])) OR (uncertainty[tiab] AND (measurement[tiab] OR measuring[tiab])) OR "standard error of measurement"[tiab] OR sensitiv[tiab] OR responsive[tiab] OR ((minimal[tiab] OR minimally[tiab] OR clinical[tiab] OR clinically[tiab]) AND (important[tiab] OR significant[tiab] OR detectable[tiab]) AND (change[tiab] OR difference[tiab])) OR (small[tiab] AND (real[tiab] OR detectable[tiab]) AND (change[tiab] OR difference[tiab])) OR meaningful change [tiab] OR "ceiling effect"[tiab] OR "floor effect"[tiab] OR "Item response model"[tiab] OR IR[tiab] OR Rasch[tiab] OR "Differential item functioning"[tiab] OR DIF[tiab] OR "computer adaptive testing"[tiab] OR "item bank"[tiab] OR "cross-cultural equivalence"[tiab]))))

#4 = #1 AND #2 AND #3

#5 FILTER BY PUBLICATION DATE (date of last search 3 June 2014) 2014/6/3

**NOT**

#6 = #5 NOT exclusion filter

**EXCLUSION FILTER (APPLY AS DESCRIBED, Terwee 2009)**

((("addresses"[Publication Type] OR "biography"[Publication Type] OR "case reports"[Publication Type] OR "comment"[Publication Type] OR "directory"[Publication Type] OR "editorial"[Publication Type] OR "festschrift"[Publication Type] OR "interview"[Publication Type] OR "lectures"[Publication Type] OR "legal cases"[Publication Type] OR "legislation"[Publication Type] OR "letter"[Publication Type] OR "news"[Publication Type] OR "newspaper article"[Publication Type] OR "patient education handout" [Publication Type] OR "popular works"[Publication Type] OR "congresses" [Publication Type] OR "consensus development conference"[Publication Type] OR "consensus development conference, nih"[Publication Type] OR "practice guideline"[Publication Type]) NOT ("animals"[MeSH Terms] NOT "humans"[MeSH Terms]))
