# Supplementary material
Source: PubMed Central journal article supplement (PMC5192798)
Supplement: MILQ-94-862-s003.pdf [file MILQ-94-862-s003.pdf]

## Appendix C

### Key characteristics of instruments identified

|     | Index Instrument<br>(209 index instruments;<br>379 validation studies) | Reference Study<br>(300 articles) | Year | Country     | Purpose of instrument                                                                                                                                                                        | Type of<br>respondent                   | Sample population                                                                                                                                                                                                                                                           | Language            | Description of version, items, and<br>subscales                                                                                                                                                                                                                                                                                                                                                                                                                                                                                                                                              | Response options                                                                                                                                                                             | Construct purported to measure                                 | Construct classification                | Domain<br>classification                                                                                                                                                                                                                                                             | Remarks  |
|-----|------------------------------------------------------------------------|-----------------------------------|------|-------------|----------------------------------------------------------------------------------------------------------------------------------------------------------------------------------------------|-----------------------------------------|-----------------------------------------------------------------------------------------------------------------------------------------------------------------------------------------------------------------------------------------------------------------------------|---------------------|----------------------------------------------------------------------------------------------------------------------------------------------------------------------------------------------------------------------------------------------------------------------------------------------------------------------------------------------------------------------------------------------------------------------------------------------------------------------------------------------------------------------------------------------------------------------------------------------|----------------------------------------------------------------------------------------------------------------------------------------------------------------------------------------------|----------------------------------------------------------------|-----------------------------------------|--------------------------------------------------------------------------------------------------------------------------------------------------------------------------------------------------------------------------------------------------------------------------------------|----------|
|     | (1)                                                                    |                                   |      |             |                                                                                                                                                                                              |                                         |                                                                                                                                                                                                                                                                             |                     |                                                                                                                                                                                                                                                                                                                                                                                                                                                                                                                                                                                              |                                                                                                                                                                                              |                                                                |                                         |                                                                                                                                                                                                                                                                                      |          |
| 1.  | 4-point Ordinal Alliance<br>Scale (4PAS)                               | Misdrahi <sup>1</sup>             | 2009 | France      | To assess therapeutic alliance<br>between patient and physician                                                                                                                              | patients                                |                                                                                                                                                                                                                                                                             | French              | 11 items                                                                                                                                                                                                                                                                                                                                                                                                                                                                                                                                                                                     | rating scale                                                                                                                                                                                 | patient-centered care: therapeutic alliance                    | patient-centered care                   | clinical integration                                                                                                                                                                                                                                                                 |          |
|     | (2)                                                                    |                                   |      |             |                                                                                                                                                                                              |                                         |                                                                                                                                                                                                                                                                             |                     |                                                                                                                                                                                                                                                                                                                                                                                                                                                                                                                                                                                              |                                                                                                                                                                                              |                                                                |                                         |                                                                                                                                                                                                                                                                                      |          |
| 2.  | Agnew Relationship<br>Measure                                          | Agnew-Davies <sup>2</sup>         | 1998 | UK          | To examine the dimensionality<br>of the client-therapist alliance                                                                                                                            | patients and<br>healthcare<br>providers | clients and therapists                                                                                                                                                                                                                                                      | English             | 28 statements                                                                                                                                                                                                                                                                                                                                                                                                                                                                                                                                                                                | rating scale: a 7-point scale<br>anchored 'strongly disagree',<br>'moderately disagree',<br>'slightly disagree', 'neutral',<br>'slightly agree', 'moderately<br>agree', and 'strongly agree' | patient-centered care: client-therapist alliance               | patient-centered care                   | clinical integration                                                                                                                                                                                                                                                                 |          |
| 3.  |                                                                        | Stiles <sup>3</sup>               | 2002 | UK          | To measure alliance between<br>client and therapist; describing<br>the client, the therapist, and the<br>client-therapist relationship                                                       | patients and<br>healthcare<br>providers | clients and therapists<br>drawn from participants of the<br>collaborative psychotherapy<br>project (CPP)                                                                                                                                                                    | English             | 28 statements; five scales - Bond, which<br>concerns the friendliness, acceptance,<br>understanding, and support in the<br>relationship; Partnership, which concerns<br>working jointly on therapeutic tasks and<br>toward therapeutic goals; Confidence,<br>which concerns optimism and respect for<br>the therapist's professional competence;<br>Openness, which concerns the client's<br>felt freedom to disclose personal concerns<br>without fear or embarrassment; and<br>Client Initiative, which concerns the<br>client's taking responsibility for the<br>direction of the therapy | rating scale<br><br>7-point scale                                                                                                                                                            | patient-centered care: client-therapist relationship           | patient-centered care                   | clinical integration                                                                                                                                                                                                                                                                 |          |
| 4.  |                                                                        | Stiles <sup>3</sup>               | 2002 | UK          | To measure alliance between<br>client and therapist; describing<br>the client, the therapist, and the<br>client-therapist relationship                                                       | patients and<br>healthcare<br>providers | clients and therapists and<br>observers<br>drawn from participants of the<br>Second Sheffield<br>Psychotherapy Project (SPP2)                                                                                                                                               | English             | 28 statements                                                                                                                                                                                                                                                                                                                                                                                                                                                                                                                                                                                | rating scale<br><br>7-point scale                                                                                                                                                            | patient-centered care: client-therapist relationship           | patient-centered care                   | clinical integration                                                                                                                                                                                                                                                                 |          |
|     | (3)                                                                    |                                   |      |             |                                                                                                                                                                                              |                                         |                                                                                                                                                                                                                                                                             |                     |                                                                                                                                                                                                                                                                                                                                                                                                                                                                                                                                                                                              |                                                                                                                                                                                              |                                                                |                                         |                                                                                                                                                                                                                                                                                      |          |
| 5.  | Alberta Continuity of<br>Services Scale-Mental<br>Health               | Durbin, J. <sup>4</sup>           | 2004 | Canada      | A self-report scale that assesses<br>continuity of care across<br>settings and providers                                                                                                     | patients                                | respondents are primarily<br>consumers; note that there was<br>also a staff assessment<br>component but the tool used<br>was different and does not<br>measure continuity of care;<br>Completed consumer<br>interviews were linked with<br>staff assessments for this study | English             | 43 statements                                                                                                                                                                                                                                                                                                                                                                                                                                                                                                                                                                                | rating scale<br><br>5-point scale ranging from<br>strongly disagree to<br>strongly agree (midpoint<br>anchor = "not sure")                                                                   | care continuity                                                | care continuity /<br>comprehensive care | clinical integration                                                                                                                                                                                                                                                                 |          |
| 6.  |                                                                        | Joyce, A. S. <sup>5</sup>         | 2010 | Canada      | A measure of perceived<br>continuity of care                                                                                                                                                 | patients                                | adults with severe and<br>persistent mental illness                                                                                                                                                                                                                         | English             | 43 items                                                                                                                                                                                                                                                                                                                                                                                                                                                                                                                                                                                     | rating scale<br><br>5-point Likert-type scale (1<br>= strongly disagree; 2 =<br>disagree; 3 = not sure; 4 =<br>agree; 5 = strongly agree)                                                    | care continuity                                                | care continuity /<br>comprehensive care | clinical integration                                                                                                                                                                                                                                                                 |          |
|     | (4)                                                                    |                                   |      |             |                                                                                                                                                                                              |                                         |                                                                                                                                                                                                                                                                             |                     |                                                                                                                                                                                                                                                                                                                                                                                                                                                                                                                                                                                              |                                                                                                                                                                                              |                                                                |                                         |                                                                                                                                                                                                                                                                                      |          |
| 7.  | Ambulatory Care<br>Experiences Survey                                  | Safran <sup>6</sup>               | 2006 | USA         | To assess patients' experience<br>with individual primary care<br>physicians                                                                                                                 | patients                                |                                                                                                                                                                                                                                                                             | English/<br>Spanish | 11 items                                                                                                                                                                                                                                                                                                                                                                                                                                                                                                                                                                                     | rating scale                                                                                                                                                                                 | patient-centered care (i.e., physician patient<br>interaction) | patient-centered care                   | clinical integration                                                                                                                                                                                                                                                                 |          |
|     | (5)                                                                    |                                   |      |             |                                                                                                                                                                                              |                                         |                                                                                                                                                                                                                                                                             |                     |                                                                                                                                                                                                                                                                                                                                                                                                                                                                                                                                                                                              |                                                                                                                                                                                              |                                                                |                                         |                                                                                                                                                                                                                                                                                      |          |
| 8.  | Assertive Community<br>Treatment (TACT) Scale                          | Wholey, D. R. <sup>7</sup>        | 2012 | USA         | To examine the role of team<br>processes in act performance                                                                                                                                  | healthcare<br>providers                 | ACT team members                                                                                                                                                                                                                                                            | English             | 47 items                                                                                                                                                                                                                                                                                                                                                                                                                                                                                                                                                                                     | rating scale                                                                                                                                                                                 | care integration                                               | care coordination / case<br>management  | clinical integration                                                                                                                                                                                                                                                                 |          |
|     | (6)                                                                    |                                   |      |             |                                                                                                                                                                                              |                                         |                                                                                                                                                                                                                                                                             |                     |                                                                                                                                                                                                                                                                                                                                                                                                                                                                                                                                                                                              |                                                                                                                                                                                              |                                                                |                                         |                                                                                                                                                                                                                                                                                      |          |
| 9.  | Assessment of Chronic<br>Illness Care (ACIC)                           | Bonomi, A. E. <sup>8</sup>        | 2002 | USA         | To help organizational teams<br>identify areas for improvement<br>in their care for chronic<br>illnesses, and to evaluate the<br>level and nature of<br>improvements made in their<br>system | healthcare<br>providers                 | team of three members<br>(generally an administrative<br>decision maker; physician and<br>opinion leader; and nurse<br>manager/coordinator)                                                                                                                                 | English             | 28 items covering the six areas of the<br>Chronic Care Model: health care<br>organization (6 items); community<br>linkages (3 items); self-management<br>support (4 items); delivery system design<br>(6 items); decision support (4 items); and<br>clinical information systems (5 items)                                                                                                                                                                                                                                                                                                   | rating scale<br>four-point scale with 11-<br>point rating scales within<br>each                                                                                                              | chronic care (i.e., chronic illness care)                      | care integration                        | combination (i.e.,<br>community linkages<br>(system), self-<br>management support<br>(clinical), decision<br>support (clinical,<br>organizational),<br>delivery system<br>design (clinical,<br>system), information<br>systems (functional),<br>and organization of<br>care (system) |          |
| 10. |                                                                        | Cramm <sup>9</sup>                | 2011 | Netherlands | To help disease management<br>teams identify areas for<br>improvement in chronic illness<br>care and evaluate the level and<br>nature of improvements made<br>in their system                | healthcare<br>providers                 | professionals in a disease<br>management program                                                                                                                                                                                                                            | Dutch               | Original 34 items (6 subscales)                                                                                                                                                                                                                                                                                                                                                                                                                                                                                                                                                              | rating scale<br>four descriptive levels of<br>implementation ranging<br>from "little or none" to a<br>"fully-implemented<br>intervention"; within each                                       | chronic care (i.e., chronic illness care)                      | care integration                        | organizational<br>integration                                                                                                                                                                                                                                                        | original |

|     | Index Instrument<br>(209 index instruments;<br>379 validation studies) | Reference Study<br>(300 articles) | Year | Country     | Purpose of instrument                                                                                                                                                                                                               | Type of<br>respondent | Sample population                                                                                                                                                                                                                                                                                                                                                                                       | Language  | Description of version, items, and<br>subscales                                                                                                                                                       | Response options                                                                                                                                                                                                                                                                                                                                                                                                                                                                                           | Construct purported to measure                                                                                                                                        | Construct classification             | Domain<br>classification   | Remarks                                   |
|-----|------------------------------------------------------------------------|-----------------------------------|------|-------------|-------------------------------------------------------------------------------------------------------------------------------------------------------------------------------------------------------------------------------------|-----------------------|---------------------------------------------------------------------------------------------------------------------------------------------------------------------------------------------------------------------------------------------------------------------------------------------------------------------------------------------------------------------------------------------------------|-----------|-------------------------------------------------------------------------------------------------------------------------------------------------------------------------------------------------------|------------------------------------------------------------------------------------------------------------------------------------------------------------------------------------------------------------------------------------------------------------------------------------------------------------------------------------------------------------------------------------------------------------------------------------------------------------------------------------------------------------|-----------------------------------------------------------------------------------------------------------------------------------------------------------------------|--------------------------------------|----------------------------|-------------------------------------------|
|     |                                                                        |                                   |      |             |                                                                                                                                                                                                                                     |                       |                                                                                                                                                                                                                                                                                                                                                                                                         |           |                                                                                                                                                                                                       | of the four levels, respondents are asked to choose the degree to which that description applies (0-11 scale), with categories defined as: 0-2 (little or no support for chronic illness care); 3-5 (basic or intermediate support for chronic illness care); 6-8 (advanced support); and 9-11 (optimal, or comprehensive, integrated care for chronic illness)                                                                                                                                            |                                                                                                                                                                       |                                      |                            |                                           |
| 11. |                                                                        | Cramm <sup>9</sup>                | 2011 | Netherlands | To help disease management teams identify areas for improvement in chronic illness care and evaluate the level and nature of improvements made in their system                                                                      | healthcare providers  | professionals in a disease management program                                                                                                                                                                                                                                                                                                                                                           | Dutch     | 21 items (3 per subscale) - following item reduction from the original 34 items                                                                                                                       | rating scale<br>four descriptive levels of implementation ranging from "little or none" to a "fully-implemented intervention"; within each of the four levels, respondents are asked to choose the degree to which that description applies (0-11 scale), with categories defined as: 0-2 (little or no support for chronic illness care); 3-5 (basic or intermediate support for chronic illness care); 6-8 (advanced support); and 9-11 (optimal, or comprehensive, integrated care for chronic illness) | chronic care (i.e., chronic illness care)                                                                                                                             | care integration                     | organizational integration | item reduction                            |
|     | (7)                                                                    |                                   |      |             |                                                                                                                                                                                                                                     |                       |                                                                                                                                                                                                                                                                                                                                                                                                         |           |                                                                                                                                                                                                       |                                                                                                                                                                                                                                                                                                                                                                                                                                                                                                            |                                                                                                                                                                       |                                      |                            |                                           |
| 12. | Better Jobs Better Care<br>PCC instrument                              | Sullivan, J. L. <sup>10</sup>     | 2013 | USA         | To assess the quality of patient-centered care within the VA                                                                                                                                                                        | healthcare providers  | nurses, nursing assistants, recreation therapist, dietitians, chaplains, social workers, medical providers                                                                                                                                                                                                                                                                                              | English** | 50 (personhood, knowing the person, comfort care, autonomy and choice, support relations, environmental support; staff work with residents, personal environment for residents; management/structure) | rating scale                                                                                                                                                                                                                                                                                                                                                                                                                                                                                               | patient-centered care                                                                                                                                                 | patient-centered care                | clinical integration       |                                           |
|     | (8)                                                                    |                                   |      |             |                                                                                                                                                                                                                                     |                       |                                                                                                                                                                                                                                                                                                                                                                                                         |           |                                                                                                                                                                                                       |                                                                                                                                                                                                                                                                                                                                                                                                                                                                                                            |                                                                                                                                                                       |                                      |                            |                                           |
| 13. | California Psychotherapy Alliance Scales (CALPAS)                      | Barkham <sup>11</sup>             | 1993 | UK          | To measure alliance in treatment of depression                                                                                                                                                                                      | healthcare providers  | raters rated twelve separate client-therapist dyads                                                                                                                                                                                                                                                                                                                                                     | English   | 4 dimensions with 6 elements each                                                                                                                                                                     | rating scale<br>7-point Likert scale                                                                                                                                                                                                                                                                                                                                                                                                                                                                       | care coordination (i.e., alliance)                                                                                                                                    | patient-centered care                | professional integration   |                                           |
| 14. |                                                                        | Gaston <sup>12</sup>              | 1991 | Canada      | To measure alliance; to measure four theoretically derived alliance dimensions                                                                                                                                                      | patients              |                                                                                                                                                                                                                                                                                                                                                                                                         | English   | 24 items                                                                                                                                                                                              | rating scale<br>7-point scale to augment the variability of ratings (revised the original CALPAS-P with 5-point response scale)                                                                                                                                                                                                                                                                                                                                                                            | patient-centered care (i.e., PC= Patient Commitment; PWC = Patient Working Capacity; TUI = Therapist Understanding and Involvement; WSC = Working Strategy Consensus) | patient-centered care                | clinical integration       |                                           |
|     | (9)                                                                    |                                   |      |             |                                                                                                                                                                                                                                     |                       |                                                                                                                                                                                                                                                                                                                                                                                                         |           |                                                                                                                                                                                                       |                                                                                                                                                                                                                                                                                                                                                                                                                                                                                                            |                                                                                                                                                                       |                                      |                            |                                           |
| 15. | Cancer services integration                                            | Dobrow, M. J. <sup>13</sup>       | 2009 | Canada      | A measure of cancer services integration                                                                                                                                                                                            | healthcare providers  | sample of cancer care providers and administrators                                                                                                                                                                                                                                                                                                                                                      | English   | 67-item with 12 factors                                                                                                                                                                               | rating scale<br>5 point scale                                                                                                                                                                                                                                                                                                                                                                                                                                                                              | care integration                                                                                                                                                      | care integration                     | clinical integration       |                                           |
|     | (10)                                                                   |                                   |      |             |                                                                                                                                                                                                                                     |                       |                                                                                                                                                                                                                                                                                                                                                                                                         |           |                                                                                                                                                                                                       |                                                                                                                                                                                                                                                                                                                                                                                                                                                                                                            |                                                                                                                                                                       |                                      |                            |                                           |
| 16. | Care Continuity Instrument                                             | Bull, M. J. <sup>14</sup>         | 2000 | USA         | Measure of continuity of care that incorporates the perspectives of elders hospitalized for a chronic illness and their family caregivers (caregiver perspective was obtained in item development but were not used as respondents) | patients              | samples of elders hospitalized for a chronic condition; (a) at least 55 years of age; (b) able to speak and understand English, (c) hospitalized for an acute episode of congestive heart failure, chronic obstructive lung disease, or diabetes mellitus, (d) cognitively competent as determined by an acceptable score on a mental status questionnaire and (e) impaired in at least one ADL or IADL | English   | pilot version; 13 items                                                                                                                                                                               | rating scale<br>1 to 7 (none or not at all to a great deal)                                                                                                                                                                                                                                                                                                                                                                                                                                                | care continuity                                                                                                                                                       | care continuity / comprehensive care | clinical integration       | different tool versions in the same study |
| 17. |                                                                        | Bull, M. J. <sup>14</sup>         | 2000 | USA         | Measure of continuity of care that incorporates the perspectives of elders hospitalized for a chronic illness and their family caregivers (caregiver perspective was obtained in item development but were not used as respondents) | patients              | samples of elders hospitalized for a chronic condition; (a) at least 55 years of age; (b) able to speak and understand English, (c) hospitalized for an acute episode of congestive heart failure, chronic obstructive lung disease, or diabetes mellitus, (d) cognitively competent as determined by an acceptable score on a mental status questionnaire and (e) impaired in at least one ADL or IADL | English   | follow up assessment version; 13 items                                                                                                                                                                | rating scale<br>1 to 7 (none or not at all to a great deal)                                                                                                                                                                                                                                                                                                                                                                                                                                                | care continuity                                                                                                                                                       | care continuity / comprehensive care | clinical integration       | different tool versions in the same study |
|     | (11)                                                                   |                                   |      |             |                                                                                                                                                                                                                                     |                       |                                                                                                                                                                                                                                                                                                                                                                                                         |           |                                                                                                                                                                                                       |                                                                                                                                                                                                                                                                                                                                                                                                                                                                                                            |                                                                                                                                                                       |                                      |                            |                                           |

|     | Index Instrument<br>(209 index instruments;<br>379 validation studies) | Reference Study<br>(300 articles) | Year | Country            | Purpose of instrument                                                                                                                                                                                                                                                                                                                                                                                                                                                       | Type of respondent           | Sample population                                                                                                                                                                                                                                                                                                       | Language                                                                 | Description of version, items, and subscales                                                   | Response options                                                                                                                                                  | Construct purported to measure                                                                                                                         | Construct classification             | Domain classification | Remarks                                |
|-----|------------------------------------------------------------------------|-----------------------------------|------|--------------------|-----------------------------------------------------------------------------------------------------------------------------------------------------------------------------------------------------------------------------------------------------------------------------------------------------------------------------------------------------------------------------------------------------------------------------------------------------------------------------|------------------------------|-------------------------------------------------------------------------------------------------------------------------------------------------------------------------------------------------------------------------------------------------------------------------------------------------------------------------|--------------------------------------------------------------------------|------------------------------------------------------------------------------------------------|-------------------------------------------------------------------------------------------------------------------------------------------------------------------|--------------------------------------------------------------------------------------------------------------------------------------------------------|--------------------------------------|-----------------------|----------------------------------------|
| 18. | Care Process Self Evaluation Tool (CPSET)                              | Seys, D. <sup>15</sup>            | 2013 | Multiple Countries | To assess the care coordination processes                                                                                                                                                                                                                                                                                                                                                                                                                                   | healthcare providers         |                                                                                                                                                                                                                                                                                                                         | not reported                                                             | 29 items                                                                                       | rating scale                                                                                                                                                      | multiple constructs: patient-centered care, care coordination, communication with patient and family, collaboration with primary care, care transition | care integration                     | clinical integration  | different studies                      |
| 19. |                                                                        | Vanhaecht, K. <sup>16</sup>       | 2007 | Multiple Countries | To evaluate care processes                                                                                                                                                                                                                                                                                                                                                                                                                                                  | healthcare providers         | medical doctor in charge, the head nurse, most involved allied health professional and clinical pathway facilitator                                                                                                                                                                                                     | Dutch                                                                    | 87 items; 24 context items, 51 mechanism items, nine outcome items and three general CMO items | rating scale                                                                                                                                                      | other: care processes                                                                                                                                  | care integration                     | clinical integration  | different studies                      |
|     | (12)                                                                   |                                   |      |                    |                                                                                                                                                                                                                                                                                                                                                                                                                                                                             |                              |                                                                                                                                                                                                                                                                                                                         |                                                                          |                                                                                                |                                                                                                                                                                   |                                                                                                                                                        |                                      |                       |                                        |
| 20. | Care Transition Measure (CTM)                                          | Bakshi, A. B. <sup>17</sup>       | 2012 | Singapore          | To measure quality of care during transition, from the patients' perspective; designed to measure the overall care transition experience and not merely the hospital discharge phase                                                                                                                                                                                                                                                                                        | patients or patients (proxy) | patients were recruited but if unavailable or too weak, informal caregivers were interviewed as proxy patients discharged from two tertiary hospital; aged 50 years and above, hospital care by disciplines of general medicine, general surgery, orthopedics, or geriatric medicine, and home residence upon discharge | English administered in Chinese or English (as preferred by respondents) | CTM-15 English; 15 items                                                                       | rating scale compared the effects of three-point and five-point Likert response scales (currently used in the CTM) on the psychometric properties of the measures | care continuity: care transition                                                                                                                       | care continuity / comprehensive care | clinical integration  | different number of items and language |
| 21. |                                                                        | Bakshi, A. B. <sup>17</sup>       | 2012 | Singapore          | To measure quality of care during transition, from the patients' perspective; designed to measure the overall care transition experience and not merely the hospital discharge phase note: ctm-3 was not separately administered, scores calculated from the administration of ctm-15), the analysis of the three-scale response was for maximizing the usefulness of the instrument as fewer response choices pose less administrative and cognitive burden to respondents | patients or patients (proxy) | patients were recruited but if unavailable or too weak, informal caregivers were interviewed as proxy patients discharged from two tertiary hospital; aged 50 years and above, hospital care by disciplines of general medicine, general surgery, orthopedics, or geriatric medicine, and home residence upon discharge | English administered in Chinese or English (as preferred by respondents) | CTM-3 English; 3 items                                                                         | rating scale compared the effects of three-point and five-point Likert response scales (currently used in the CTM) on the psychometric properties of the measures | care continuity: care transition                                                                                                                       | care continuity / comprehensive care | clinical integration  | different number of items and language |
| 22. |                                                                        | Bakshi, A. B. <sup>17</sup>       | 2012 | Singapore          | To measure of quality of care during transition, from the patients' perspective; designed to measure the overall care transition experience and not merely the hospital discharge phase                                                                                                                                                                                                                                                                                     | patients or patients (proxy) | patients were recruited but if unavailable or too weak, informal caregivers were interviewed as proxy patients discharged from two tertiary hospital; aged 50 years and above, hospital care by disciplines of general medicine, general surgery, orthopedics, or geriatric medicine, and home residence upon discharge | Chinese administered in Chinese or English (as preferred by respondents) | CTM-15 Chinese; 15 items                                                                       | rating scale compared the effects of three-point and five-point Likert response scales (currently used in the CTM) on the psychometric properties of the measures | care continuity: care transition                                                                                                                       | care continuity / comprehensive care | clinical integration  | different number of items and language |
| 23. |                                                                        | Bakshi, A. B. <sup>17</sup>       | 2012 | Singapore          | To measure quality of care during transition, from the patients' perspective; designed to measure the overall care transition experience and not merely the hospital discharge phase note: CTM-3 was not separately administered, scores calculated from the administration of CTM-15), the analysis of the three-scale response was for maximizing the usefulness of the instrument as fewer response choices pose less administrative and cognitive burden to respondents | patients or patients (proxy) | patients were recruited but if unavailable or too weak, informal caregivers were interviewed as proxy patients discharged from two tertiary hospital; aged 50 years and above, hospital care by disciplines of general medicine, general surgery, orthopedics, or geriatric medicine, and home residence upon discharge | Chinese administered in Chinese or English (as preferred by respondents) | CTM-3 Chinese; 3 items                                                                         | rating scale compared the effects of three-point and five-point Likert response scales (currently used in the CTM) on the psychometric properties of the measures | care continuity: care transition                                                                                                                       | care continuity / comprehensive care | clinical integration  | different number of items and language |
| 24. |                                                                        | Parry, C. <sup>18</sup>           | 2008 | USA                | To assess the quality of care transition objectively                                                                                                                                                                                                                                                                                                                                                                                                                        | patients                     |                                                                                                                                                                                                                                                                                                                         | English**                                                                | CTM-15 English; 15 items                                                                       | rating scale                                                                                                                                                      | care continuity                                                                                                                                        | care continuity / comprehensive care | clinical integration  | different studies                      |
| 25. |                                                                        | Coleman <sup>19</sup>             | 2005 | USA                | To better understand the care transition experience and to rigorously assess its quality                                                                                                                                                                                                                                                                                                                                                                                    | patients                     |                                                                                                                                                                                                                                                                                                                         | English                                                                  | CTM-15 English; 15 items                                                                       | rating scale 4-point response scale: strongly agree; agree; disagree; and strongly disagree                                                                       | care continuity: care transition                                                                                                                       | care continuity / comprehensive care | clinical integration  | different studies                      |
| 26. |                                                                        | Coleman <sup>20</sup>             | 2002 | USA                | To assess the quality of care transitions across healthcare settings                                                                                                                                                                                                                                                                                                                                                                                                        | patients                     | elderly recently discharged from hospital                                                                                                                                                                                                                                                                               | English                                                                  | CTM English; 17 items (?)                                                                      | rating scale Likert-response format                                                                                                                               | care continuity: care transition                                                                                                                       | care continuity / comprehensive care | clinical integration  | different studies                      |
| 27. |                                                                        | Shadmi <sup>21</sup>              | 2009 | Israel             | To assess the quality of care transitions from the patients' perspective                                                                                                                                                                                                                                                                                                                                                                                                    | patients                     |                                                                                                                                                                                                                                                                                                                         | Hebrew                                                                   | CTM-15 English; 15 items                                                                       | rating scale                                                                                                                                                      | care continuity                                                                                                                                        | care continuity / comprehensive care | clinical integration  | different language                     |
| 28. |                                                                        | Shadmi <sup>21</sup>              | 2009 | Israel             | To assess the quality of care transitions from the patients' perspective                                                                                                                                                                                                                                                                                                                                                                                                    | patients                     |                                                                                                                                                                                                                                                                                                                         | Arabic                                                                   | CTM-15 English; 15 items                                                                       | rating scale                                                                                                                                                      | care continuity                                                                                                                                        | care continuity / comprehensive care | clinical integration  | different language                     |

|     | Index Instrument<br>(209 index instruments;<br>379 validation studies) | Reference Study<br>(300 articles)      | Year | Country            | Purpose of instrument                                                                                                                                                                                                                                      | Type of<br>respondent             | Sample population                                                                                                                        | Language                                                                                                         | Description of version, items, and<br>subscales                                                                                                                                                                                       | Response options                                                                                                                                                                        | Construct purported to measure                                                                                                                                                                                 | Construct classification            | Domain<br>classification                                                                             | Remarks                                    |
|-----|------------------------------------------------------------------------|----------------------------------------|------|--------------------|------------------------------------------------------------------------------------------------------------------------------------------------------------------------------------------------------------------------------------------------------------|-----------------------------------|------------------------------------------------------------------------------------------------------------------------------------------|------------------------------------------------------------------------------------------------------------------|---------------------------------------------------------------------------------------------------------------------------------------------------------------------------------------------------------------------------------------|-----------------------------------------------------------------------------------------------------------------------------------------------------------------------------------------|----------------------------------------------------------------------------------------------------------------------------------------------------------------------------------------------------------------|-------------------------------------|------------------------------------------------------------------------------------------------------|--------------------------------------------|
|     | (13)                                                                   |                                        |      |                    |                                                                                                                                                                                                                                                            |                                   |                                                                                                                                          |                                                                                                                  |                                                                                                                                                                                                                                       |                                                                                                                                                                                         |                                                                                                                                                                                                                |                                     |                                                                                                      |                                            |
| 29. | Caregivers' Satisfaction with Stroke Care Questionnaire: C-SASC        | Cramm <sup>22</sup>                    | 2011 | Netherlands        | To measure stroke caregivers' satisfaction with hospital stroke care                                                                                                                                                                                       | informal caregivers               | caregivers of stroke patients                                                                                                            | English                                                                                                          | 11 items; 8 items (final)                                                                                                                                                                                                             | rating scale<br>four-point scale ranging from 0 (strongly disagree) to 3 (strongly agree)                                                                                               | patient satisfaction (i.e., satisfaction with care)                                                                                                                                                            | care integration                    | clinical integration                                                                                 |                                            |
|     | (14)                                                                   |                                        |      |                    |                                                                                                                                                                                                                                                            |                                   |                                                                                                                                          |                                                                                                                  |                                                                                                                                                                                                                                       |                                                                                                                                                                                         |                                                                                                                                                                                                                |                                     |                                                                                                      |                                            |
| 30. | CARES observation tool (COT)                                           | Gaugler, J. E. <sup>23</sup>           | 2013 | USA                | To measure the presence of person-centered care elements for individuals with dementia                                                                                                                                                                     | others: observers                 | observer focused on different direct care workers and persons with dementia in recording data for the COT                                | English                                                                                                          | 16 items                                                                                                                                                                                                                              | dichotomous scale                                                                                                                                                                       | patient-centered care                                                                                                                                                                                          | patient-centered care               | clinical integration                                                                                 |                                            |
|     | (15)                                                                   |                                        |      |                    |                                                                                                                                                                                                                                                            |                                   |                                                                                                                                          |                                                                                                                  |                                                                                                                                                                                                                                       |                                                                                                                                                                                         |                                                                                                                                                                                                                |                                     |                                                                                                      |                                            |
| 31. | CareWell in Hospital Questionnaire                                     | Bakker, F. C. <sup>24</sup>            | 2014 | Netherlands        | A questionnaire that is based on the CQI and can be used to measure the quality of individualized and integrated hospital care as experienced by inpatients age 70 years and older                                                                         | patients                          | frail and non-frail medical and surgical inpatients who were included in the CWH before after study                                      | English                                                                                                          | 8 items                                                                                                                                                                                                                               | rating scale<br>answer categories were recoded to a 0–10 scale; 10 represents the highest quality of care                                                                               | multiple constructs (i.e., quality of individualized and integrated hospital care as experienced by inpatient, i.e., continuity of care, coordination and patient centered care)                               | care integration                    | clinical integration                                                                                 |                                            |
|     | (16)                                                                   |                                        |      |                    |                                                                                                                                                                                                                                                            |                                   |                                                                                                                                          |                                                                                                                  |                                                                                                                                                                                                                                       |                                                                                                                                                                                         |                                                                                                                                                                                                                |                                     |                                                                                                      |                                            |
| 32. | Caring Assessment Tool (CAT)                                           | Duffy, J. R. <sup>25</sup>             | 2014 | USA                | To assess patients' perceptions of the patient– RN relationship                                                                                                                                                                                            | patients                          | (a) alert and oriented, (b) admitted to the hospital for at least 24 hours, and (c) could understand English                             | English                                                                                                          | 27 items following item reduction (initially 36 items)                                                                                                                                                                                | rating scale<br>1 (low caring) to 5 (high caring) rating scale                                                                                                                          | patient-centered care (i.e., patient-nurse relationship)                                                                                                                                                       | patient-centered care               | clinical integration                                                                                 | different number of items (item reduction) |
| 33. |                                                                        | Duffy <sup>26</sup>                    | 2007 | USA                | To assess patients' perceptions of nurse caring behaviors (original)                                                                                                                                                                                       | patients                          | adults from all diagnostic, socio-economic gender, and ethnic groups                                                                     | English                                                                                                          | 36 items; 8 factors                                                                                                                                                                                                                   | rating scale<br>closed response 5-point Likert                                                                                                                                          | patient-centered care (i.e., mutual problem solving, attentive reassurance, human respect, encouraging manner, appreciation of unique meanings, healing environment, affiliation needs, and basic human needs) | patient-centered care               | clinical integration                                                                                 | different number of items (item reduction) |
|     | (17)                                                                   |                                        |      |                    |                                                                                                                                                                                                                                                            |                                   |                                                                                                                                          |                                                                                                                  |                                                                                                                                                                                                                                       |                                                                                                                                                                                         |                                                                                                                                                                                                                |                                     |                                                                                                      |                                            |
| 34. | Case Management Quality Questionnaire (CMQQ)                           | Hadjistavropoulos, H. D. <sup>27</sup> | 2003 | Canada             | To systematically assess strengths and weaknesses of case management; to be used with elderly clients using case management services, either as the means of obtaining community services such as HC or as a method to gain access to long-term care (LTC) | patients and healthcare providers | HC patients OR family members of LTC patients                                                                                            | English                                                                                                          | 30 items                                                                                                                                                                                                                              | rating scale<br>1 (strongly disagree) to 5 (strongly agree) scale, with higher scores indicating greater satisfaction; the middle score (3) is anchored with the words "hard to decide" | case management                                                                                                                                                                                                | care coordination / case management | clinical integration                                                                                 |                                            |
|     | (18)                                                                   |                                        |      |                    |                                                                                                                                                                                                                                                            |                                   |                                                                                                                                          |                                                                                                                  |                                                                                                                                                                                                                                       |                                                                                                                                                                                         |                                                                                                                                                                                                                |                                     |                                                                                                      |                                            |
| 35. | Client Perception of Coordination Questionnaire (CPCQ)                 | McGuiness, C. <sup>28</sup>            | 2003 | Australia          | To assess the various domains of coordination                                                                                                                                                                                                              | patients                          |                                                                                                                                          | English**                                                                                                        | 32 items                                                                                                                                                                                                                              | rating scale                                                                                                                                                                            | care coordination                                                                                                                                                                                              | care coordination / case management | clinical integration                                                                                 |                                            |
|     | (19)                                                                   |                                        |      |                    |                                                                                                                                                                                                                                                            |                                   |                                                                                                                                          |                                                                                                                  |                                                                                                                                                                                                                                       |                                                                                                                                                                                         |                                                                                                                                                                                                                |                                     |                                                                                                      |                                            |
| 36. | Client-Centered Questionnaire                                          | de Witte, L. <sup>29</sup>             | 2006 | Netherlands        | To measure the client-centeredness of professional nursing in home care from a client perspective                                                                                                                                                          | patients                          | clients from three different home care organizations                                                                                     | English**                                                                                                        | 15 items                                                                                                                                                                                                                              | rating scale<br>scored on a 5-point Likert scale, ranging from 'totally disagree' (1) to 'totally agree' (5)                                                                            | patient-centered care                                                                                                                                                                                          | patient-centered care               | clinical integration                                                                                 |                                            |
|     | (20)                                                                   |                                        |      |                    |                                                                                                                                                                                                                                                            |                                   |                                                                                                                                          |                                                                                                                  |                                                                                                                                                                                                                                       |                                                                                                                                                                                         |                                                                                                                                                                                                                |                                     |                                                                                                      |                                            |
| 37. | Client-Centered Rehabilitation Questionnaire                           | Cott, C. A. <sup>30</sup>              | 2006 | Canada             | To measure client-centered rehabilitation from the client's perspective and can be used for discriminative and evaluative purposes                                                                                                                         | patients                          | clients who had been discharged from the two rehabilitation hospitals in Toronto during the six-month period prior to the survey mailing | English                                                                                                          | 35 items (initially 38 items)                                                                                                                                                                                                         | rating scale<br>5-point Likert scale with 5 being strongly disagree, 4 being disagree, 3 being neither agree nor disagree, 2 being agree and 1 being strongly agree                     | patient-centered care                                                                                                                                                                                          | patient-centered care               | clinical integration                                                                                 |                                            |
|     | (21)                                                                   |                                        |      |                    |                                                                                                                                                                                                                                                            |                                   |                                                                                                                                          |                                                                                                                  |                                                                                                                                                                                                                                       |                                                                                                                                                                                         |                                                                                                                                                                                                                |                                     |                                                                                                      |                                            |
| 38. | Clinical Risk Monitoring Instrument                                    | Briner, M. <sup>31</sup>               | 2010 | Switzerland        | To assess clinical risk management in hospitals                                                                                                                                                                                                            | healthcare providers              | CRM practitioners                                                                                                                        | translated (from the original German) to French and Italian for use in the three language regions in Switzerland | 28 main questions organized in three sections: 1) Implementation and organizational integration of CRM, 2) Strategic objectives and operational implementation of CRM at hospital level, and 3) Overview of CRM in different services | rating scale<br>a rating scale showing diffusion and homogeneity; four-point Likert scale; open text fields for specific responses                                                      | other: clinical risk management                                                                                                                                                                                | patient-centered care               | combination (i.e., organizational integration in the CRM context, system and functional integration) |                                            |
|     | (22)                                                                   |                                        |      |                    |                                                                                                                                                                                                                                                            |                                   |                                                                                                                                          |                                                                                                                  |                                                                                                                                                                                                                                       |                                                                                                                                                                                         |                                                                                                                                                                                                                |                                     |                                                                                                      |                                            |
| 39. | Clinician Support for Patient Activation Measure (CS-PAM)              | Hibbard, J. H. <sup>32</sup>           | 2010 | Multiple Countries | To determine the degree to which the patient behavior or skill is viewed as important by the clinician                                                                                                                                                     | healthcare providers              | UK and US sample of primary care clinicians: primary care physicians, nurse practitioners and physician assistants                       | English                                                                                                          | 14 items                                                                                                                                                                                                                              | rating scale<br>4-point scale                                                                                                                                                           | other: patient self-management                                                                                                                                                                                 | patient-centered care               | clinical integration                                                                                 |                                            |
|     | (23)                                                                   |                                        |      |                    |                                                                                                                                                                                                                                                            |                                   |                                                                                                                                          |                                                                                                                  |                                                                                                                                                                                                                                       |                                                                                                                                                                                         |                                                                                                                                                                                                                |                                     |                                                                                                      |                                            |
| 40. | CollaboRATE                                                            | Barr, P. J. <sup>33</sup>              | 2014 | USA                | Patient reported measure of shared decision making                                                                                                                                                                                                         | patients                          | any person visiting a health provider                                                                                                    | English                                                                                                          | 3 items                                                                                                                                                                                                                               | rating scale<br>10 point scale                                                                                                                                                          | patient-centered care                                                                                                                                                                                          | patient-centered care               | clinical integration                                                                                 | different response scales                  |
| 41. |                                                                        | Barr, P. J. <sup>33</sup>              | 2014 | USA                | Patient reported measure of shared decision making                                                                                                                                                                                                         | patients                          | any person visiting a health provider                                                                                                    | English                                                                                                          | 3 items                                                                                                                                                                                                                               | rating scale<br>5 point scale                                                                                                                                                           | patient-centered care                                                                                                                                                                                          | patient-centered care               | clinical integration                                                                                 | different response scales                  |
| 42. |                                                                        | Elwyn <sup>34</sup>                    | 2013 | USA                | Patient reported measure of shared decision making                                                                                                                                                                                                         | patients                          | not necessarily patients (general public)                                                                                                | English                                                                                                          | 3 items                                                                                                                                                                                                                               | rating scale<br>scale from 1 = No effort                                                                                                                                                | patient-centered care                                                                                                                                                                                          | patient-centered care               | clinical integration                                                                                 |                                            |

|     | Index Instrument<br>(209 index instruments;<br>379 validation studies) | Reference Study<br>(300 articles) | Year | Country            | Purpose of instrument                                                                                                                                                | Type of<br>respondent             | Sample population                                                                                                                                          | Language                                                          | Description of version, items, and<br>subscales                                                                                                                                            | Response options                                                                                             | Construct purported to measure                                                                                                                                                                                                                                                                                                                                                               | Construct classification             | Domain<br>classification                                   | Remarks                              |
|-----|------------------------------------------------------------------------|-----------------------------------|------|--------------------|----------------------------------------------------------------------------------------------------------------------------------------------------------------------|-----------------------------------|------------------------------------------------------------------------------------------------------------------------------------------------------------|-------------------------------------------------------------------|--------------------------------------------------------------------------------------------------------------------------------------------------------------------------------------------|--------------------------------------------------------------------------------------------------------------|----------------------------------------------------------------------------------------------------------------------------------------------------------------------------------------------------------------------------------------------------------------------------------------------------------------------------------------------------------------------------------------------|--------------------------------------|------------------------------------------------------------|--------------------------------------|
|     |                                                                        |                                   |      |                    |                                                                                                                                                                      |                                   |                                                                                                                                                            |                                                                   |                                                                                                                                                                                            | was made, to 10 = Every effort was made                                                                      |                                                                                                                                                                                                                                                                                                                                                                                              |                                      |                                                            |                                      |
|     | (24)                                                                   |                                   |      |                    |                                                                                                                                                                      |                                   |                                                                                                                                                            |                                                                   |                                                                                                                                                                                            |                                                                                                              |                                                                                                                                                                                                                                                                                                                                                                                              |                                      |                                                            |                                      |
| 43. | Collaboration And Satisfaction About Care Decisions                    | Baggs <sup>35</sup>               | 1994 | USA                | To measure the construct of nurse-physician collaboration in making specific patient care decisions                                                                  | healthcare providers              | nurses and resident physicians                                                                                                                             | English                                                           | 9 items                                                                                                                                                                                    | rating scale<br>7-point scale                                                                                | care coordination (i.e., collaboration)                                                                                                                                                                                                                                                                                                                                                      | care coordination / case management  | professional integration                                   |                                      |
|     | (25)                                                                   |                                   |      |                    |                                                                                                                                                                      |                                   |                                                                                                                                                            |                                                                   |                                                                                                                                                                                            |                                                                                                              |                                                                                                                                                                                                                                                                                                                                                                                              |                                      |                                                            |                                      |
| 44. | Communication Assessment Instrument                                    | Winning, T. A. <sup>36</sup>      | 2013 | Multiple Countries | To measure the effectiveness of communication skills by oral healthcare student-clinicians using patient and student evaluation                                      | patients and healthcare providers | patients and dental school clinicians                                                                                                                      | English                                                           | 47 items ( being caring and respectful, sharing information, tending your comfort, interacting with other team members and experience with other team members)                             | rating scale                                                                                                 | patient-centered care (i.e., provider-patient communication)                                                                                                                                                                                                                                                                                                                                 | patient-centered care                | clinical integration                                       |                                      |
| 45. |                                                                        | Schonwetter <sup>37</sup>         | 2012 | Canada             | To assess the quality of communication between clinicians and patients from patients perspectives                                                                    | patients                          |                                                                                                                                                            | English                                                           | 69 items                                                                                                                                                                                   | rating scale                                                                                                 | other: clinician patient communication                                                                                                                                                                                                                                                                                                                                                       | patient-centered care                | clinical integration                                       | different type of respondent         |
| 46. |                                                                        | Schonwetter <sup>37</sup>         | 2012 | Canada             | To assess the quality of communication between clinicians and patients from clinicians' perspectives                                                                 | healthcare providers              |                                                                                                                                                            | English                                                           | 69 items                                                                                                                                                                                   | rating scale                                                                                                 | other: clinician patient communication                                                                                                                                                                                                                                                                                                                                                       | patient-centered care                | clinical integration                                       | different type of respondent         |
| 47. |                                                                        | Wener <sup>38</sup>               | 2011 | Canada             | To self-assess student clinician communication with their patients                                                                                                   | healthcare providers              | dental student clinicians                                                                                                                                  | English                                                           | 72 items; final communications instrument has 72 items in seven categories plus 7 demographic items                                                                                        | not reported                                                                                                 | patient-centered care (i.e., communication)                                                                                                                                                                                                                                                                                                                                                  | patient-centered care                | clinical integration                                       | different type of respondent         |
| 48. |                                                                        | Wener <sup>38</sup>               | 2011 | Canada             | To assess their dental and dental hygiene student clinicians' communication                                                                                          | patients                          | patients of dental students                                                                                                                                | English                                                           | 72 items; final communications instrument has 72 items in seven categories plus 7 demographic items                                                                                        | not reported                                                                                                 | patient-centered care (i.e., communication)                                                                                                                                                                                                                                                                                                                                                  | patient-centered care                | clinical integration                                       | different type of respondent         |
|     | (26)                                                                   |                                   |      |                    |                                                                                                                                                                      |                                   |                                                                                                                                                            |                                                                   |                                                                                                                                                                                            |                                                                                                              |                                                                                                                                                                                                                                                                                                                                                                                              |                                      |                                                            |                                      |
| 49. | Components of Primary Care Index (CPCI)                                | Beaulieu, M. D. <sup>39</sup>     | 2011 | Canada             | Provide best description of regular doctor                                                                                                                           | patients                          | healthcare users balanced by English/ French language, rural/urban location, low/high level of education and poor/average/excellent overall PHC experience | French/English                                                    | 6 items (one subscale)                                                                                                                                                                     | semantic differential<br>semantic differential opinion, 1=strongly disagree, 6=strongly agree                | patient-centered care (i.e., primary care component)                                                                                                                                                                                                                                                                                                                                         | patient-centered care                | clinical integration                                       |                                      |
| 50. |                                                                        | Flocke, S. A. <sup>40</sup>       | 1997 | USA                | To measure seven key aspects of the delivery of primary care from the perspective of patients visiting their family physician                                        | patients                          | patients from clinics where physicians volunteered to participate                                                                                          | English                                                           | 20 items                                                                                                                                                                                   | rating scale<br>5-point Likert-type scale, ranging from 1=strongly disagree to 5=strongly agree              | multiple constructs: the seven components of primary care selected are: (1) comprehensiveness, (2) physician accumulated knowledge about patient, (3) interpersonal communication, (4) coordination of care and patient rating of the importance of coordination, (5) first-contact care, (6) continuity of care and patient rating of the importance of continuity, and (7) longitudinality | care integration                     | clinical integration                                       |                                      |
| 51. |                                                                        | Haggerty, J. L. <sup>41</sup>     | 2011 | Canada             | To measure comprehensive care                                                                                                                                        | patients                          | healthcare users                                                                                                                                           | English                                                           | 6 items                                                                                                                                                                                    | semantic differential<br>semantic differential opinion, 1=strongly disagree, 6=strongly agree                | comprehensive care                                                                                                                                                                                                                                                                                                                                                                           | care continuity / comprehensive care | clinical integration                                       | different number of items and scales |
| 52. |                                                                        | Haggerty, J. L. <sup>41</sup>     | 2011 | Canada             | To measure primary care in community context                                                                                                                         | patients                          | healthcare users                                                                                                                                           | English                                                           | 2 items                                                                                                                                                                                    | semantic differential<br>semantic differential opinion, 1=strongly disagree, 6=strongly agree                | comprehensive care                                                                                                                                                                                                                                                                                                                                                                           | care continuity / comprehensive care | clinical integration                                       | different number of items and scales |
| 53. |                                                                        | Burge <sup>42</sup>               | 2011 | Canada             | To measure agreement with statements about regular doctor                                                                                                            | patients                          |                                                                                                                                                            | French and English (had to check related article for this detail) | 5 of 24 items                                                                                                                                                                              | rating scale<br>Likert evaluative                                                                            | care continuity (i.e., relational continuity)                                                                                                                                                                                                                                                                                                                                                | care continuity / comprehensive care | professional integration                                   | different number of items and scales |
| 54. |                                                                        | Haggerty <sup>43</sup>            | 2011 | Canada             | Mapped attributes: relational continuity, interpersonal communication, management continuity, whole person care                                                      | patients                          |                                                                                                                                                            | French and English                                                | Item distribution per subscale: Relational Continuity (5), Interpersonal Communication (6), Comprehensiveness (6), Whole-Person care (2), Management continuity [coordination of care] (8) | rating scale<br>1 to 6 scale                                                                                 | multiple constructs: care coordination, care continuity, patient-centered care, comprehensive care                                                                                                                                                                                                                                                                                           | care integration                     | combination (i.e., clinical, professional, organizational) | different number of items and scales |
| 55. |                                                                        | Haggerty <sup>44</sup>            | 2011 | Canada             | Coordination of care subscale                                                                                                                                        | patients                          | healthcare users                                                                                                                                           | French and English                                                | 4 items                                                                                                                                                                                    | semantic differential<br>6-point semantic differential scale                                                 | care coordination                                                                                                                                                                                                                                                                                                                                                                            | care integration                     | organizational integration                                 | different number of items and scales |
|     | (27)                                                                   |                                   |      |                    |                                                                                                                                                                      |                                   |                                                                                                                                                            |                                                                   |                                                                                                                                                                                            |                                                                                                              |                                                                                                                                                                                                                                                                                                                                                                                              |                                      |                                                            |                                      |
| 56. | CONNECT                                                                | Chavez, L. M. <sup>45</sup>       | 2007 | Multiple Countries | A multidimensional measure designed for use with seriously mentally ill respondents                                                                                  | patients                          | adults suffering from severe depression, schizophrenia, bipolar disorders and other disorders with emotionally impairing symptoms                          | Spanish                                                           | 12 scales and one single-item indicator                                                                                                                                                    | rating scale<br>include both questions and statements, which respondents rate using five-point rating scales | care continuity                                                                                                                                                                                                                                                                                                                                                                              | care continuity / comprehensive care | clinical integration                                       |                                      |
| 57. |                                                                        | Ware, N. C. <sup>46</sup>         | 2003 | USA                | To measure continuity of care; CONNECT addresses qualities of interpersonal interaction in service-user/practitioner relationships                                   | patients                          | Patients with serious mental illnesses                                                                                                                     | English**                                                         | 13 scales and one single-item indicator                                                                                                                                                    | rating scale                                                                                                 | care continuity                                                                                                                                                                                                                                                                                                                                                                              | care continuity / comprehensive care | clinical integration                                       |                                      |
|     | (28)                                                                   |                                   |      |                    |                                                                                                                                                                      |                                   |                                                                                                                                                            |                                                                   |                                                                                                                                                                                            |                                                                                                              |                                                                                                                                                                                                                                                                                                                                                                                              |                                      |                                                            |                                      |
| 58. | Consultation and Relational Empathy (CARE) measure                     | Fung, C. S. <sup>47</sup>         | 2009 | Hong Kong          | To assess the patients' perceptions of relational empathy and communication in the consultation; a patient-rated measure of consultation quality validated in the UK | patients                          | primary care patients                                                                                                                                      | Chinese                                                           | 10 items                                                                                                                                                                                   | rating scale<br>4-point scale                                                                                | patient-centered care                                                                                                                                                                                                                                                                                                                                                                        | patient-centered care                | clinical integration                                       |                                      |



|     | Index Instrument<br>(209 index instruments;<br>379 validation studies) | Reference Study<br>(300 articles) | Year | Country     | Purpose of instrument                                                                                                                                                   | Type of<br>respondent            | Sample population                                                                                                                                                    | Language         | Description of version, items, and<br>subscales | Response options                                                                                                           | Construct purported to measure                                                                             | Construct classification | Domain<br>classification                        | Remarks                                    |
|-----|------------------------------------------------------------------------|-----------------------------------|------|-------------|-------------------------------------------------------------------------------------------------------------------------------------------------------------------------|----------------------------------|----------------------------------------------------------------------------------------------------------------------------------------------------------------------|------------------|-------------------------------------------------|----------------------------------------------------------------------------------------------------------------------------|------------------------------------------------------------------------------------------------------------|--------------------------|-------------------------------------------------|--------------------------------------------|
| 59. |                                                                        | Mercer <sup>48</sup>              | 2004 | UK          | To measure relational empathy in doctor and patient consultation                                                                                                        | patients                         |                                                                                                                                                                      | English          | 10 items                                        | rating scale                                                                                                               | other: physician- patient communication                                                                    | patient-centered care    | clinical integration                            | different studies                          |
| 60. |                                                                        | Mercer <sup>49</sup>              | 2008 | Scotland    | To measure relational empathy in doctor and patient consultation                                                                                                        | patients and informal caregivers | caregivers of children were included                                                                                                                                 | English          | 10 items                                        | rating scale                                                                                                               | other: empathy                                                                                             | patient-centered care    | clinical integration                            | different studies                          |
| 61. |                                                                        | Mercer <sup>50</sup>              | 2008 | Scotland    | To measure relational empathy in doctor and patient consultation                                                                                                        | patients                         |                                                                                                                                                                      | English          | 10 items                                        | rating scale                                                                                                               | other: empathy                                                                                             | patient-centered care    | clinical integration                            | different studies                          |
| 62. |                                                                        | Mercer SW <sup>51</sup>           | 2008 | UK          | To measure relational empathy in doctor and patient consultation                                                                                                        | patients                         |                                                                                                                                                                      | English          | 10 items                                        | rating scale                                                                                                               | other: empathy (physician-patient communication)                                                           | patient-centered care    | clinical integration                            | different studies                          |
|     | (29)                                                                   |                                   |      |             |                                                                                                                                                                         |                                  |                                                                                                                                                                      |                  |                                                 |                                                                                                                            |                                                                                                            |                          |                                                 |                                            |
| 63. | Consumer Assessment of Behavioral Health Survey (CABHS)                | Eisen <sup>52</sup>               | 2001 | USA         | To assess behavioral health services and insurance plans (based on CAHPS)                                                                                               | patients                         | adults enrolled in a behavioral health plan                                                                                                                          | English          | not specified                                   | rating scale a 5-point "strongly agree to strongly disagree" rating scale with "I am neutral" as the midpoint of the scale | multiple constructs (i.e., patient centeredness, coordination, continuity of care)                         | care integration         | combination (i.e., clinical and organizational) |                                            |
|     | (30)                                                                   |                                   |      |             |                                                                                                                                                                         |                                  |                                                                                                                                                                      |                  |                                                 |                                                                                                                            |                                                                                                            |                          |                                                 |                                            |
| 64. | Consumer Assessment of Health Plans Survey (CAHPS)                     | Scholle, S. H. <sup>53</sup>      | 2012 | USA         | To measure processes of care relevant to PCMH from adult patient perspectives                                                                                           | patients (proxy)                 | parent/guardian of children                                                                                                                                          | English**        | 115 items                                       | not reported                                                                                                               | patient-centered care                                                                                      | care integration         | clinical integration                            | different type of respondents              |
| 65. |                                                                        | Scholle, S. H. <sup>53</sup>      | 2012 | USA         | To measure processes of care relevant to PCMH from adult patient perspectives                                                                                           | patients                         | adult patients                                                                                                                                                       | English**        | 115 items                                       | not reported                                                                                                               | patient-centered care                                                                                      | care integration         | clinical integration                            | different type of respondents              |
| 66. |                                                                        | Arah <sup>54</sup>                | 2006 | Netherlands | To measure health care experiences from the perspective of Dutch patients and consumers, and to use the resulting information for their health care purchasing purposes | patients                         |                                                                                                                                                                      | Dutch            | 70 items which included 35 core items           | rating scale 1-to-4 response scale                                                                                         | patient-centered care (i.e., health care experiences from the perspective of Dutch patients and consumers) | care integration         | clinical integration                            |                                            |
| 67. |                                                                        | Gallagher <sup>55</sup>           | 2009 | USA         | To assess ambulatory pediatric care                                                                                                                                     | informal caregivers              | parents of pediatric patients                                                                                                                                        | English/ Spanish | 12 items                                        | other not described                                                                                                        | patient-centered care (i.e., quality of developmental and preventive care)                                 | care integration         | clinical integration                            |                                            |
| 68. |                                                                        | Hargraves <sup>56</sup>           | 2003 | USA         | Ask consumers about experiences with and evaluations of ambulatory care received from health care professionals and health plans                                        | patients                         | health insurance                                                                                                                                                     | English          | 43 items (19 core items)                        | rating scale core items: 0 to 10 rating scale                                                                              | other: getting care when needed quickly (continuity), health plan customer service                         | care integration         | clinical integration                            |                                            |
| 69. |                                                                        | Hays <sup>57</sup>                | 1999 | USA         | To develop an integrated and standardized set of surveys designed to collect reliable and valid information about health plan performance from consumers                | patients                         | demonstration sample 1                                                                                                                                               | English          | 34 items                                        | rating scale 5-point scale                                                                                                 | patient-centered care                                                                                      | care integration         | clinical integration                            | different samples                          |
| 70. |                                                                        | Hays <sup>57</sup>                | 1999 | USA         | To develop an integrated and standardized set of surveys designed to collect reliable and valid information about health plan performance from consumers                | patients                         | demonstration sample 2                                                                                                                                               | English          | 34 items                                        | rating scale 5-point scale                                                                                                 | patient-centered care                                                                                      | care integration         | clinical integration                            | different samples                          |
| 71. |                                                                        | Hays <sup>57</sup>                | 1999 | USA         | To develop an integrated and standardized set of surveys designed to collect reliable and valid information about health plan performance from consumers                | patients                         | field test sample 1                                                                                                                                                  | English          | 34 items                                        | rating scale 5-point scale                                                                                                 | patient-centered care                                                                                      | care integration         | clinical integration                            | different samples                          |
| 72. |                                                                        | Hays <sup>57</sup>                | 1999 | USA         | To develop an integrated and standardized set of surveys designed to collect reliable and valid information about health plan performance from consumers                | patients                         | field test sample 2                                                                                                                                                  | English          | 34 items                                        | rating scale 5-point scale                                                                                                 | patient-centered care                                                                                      | care integration         | clinical integration                            | different samples                          |
| 73. |                                                                        | Solomon <sup>58</sup>             | 2005 | USA         | To assess health plans in medical groups                                                                                                                                | patients                         |                                                                                                                                                                      | English          | 63 items                                        | rating scale                                                                                                               | patient-centered care                                                                                      | care integration         | clinical integration                            | different number of items (item reduction) |
| 74. |                                                                        | Solomon <sup>58</sup>             | 2005 | USA         | To assess health plans in medical groups                                                                                                                                | patients                         |                                                                                                                                                                      | English          | 83 items                                        | rating scale                                                                                                               | patient-centered care                                                                                      | care integration         | clinical integration                            | different number of items (item reduction) |
|     | (31)                                                                   |                                   |      |             |                                                                                                                                                                         |                                  |                                                                                                                                                                      |                  |                                                 |                                                                                                                            |                                                                                                            |                          |                                                 |                                            |
| 75. | Consumer Perceptions of Care (CPC)                                     | Clark, C. <sup>59</sup>           | 2008 | USA         | To assess consumers perceptions of key services integrating trauma, mental health, and substance abuse issues                                                           | patients                         | adult women who had experienced violence or abuse, had co-occurring mental health and substance use disorders, and were high utilizers of behavioral health services | English          | 26 items                                        | rating scale 4-point Likert                                                                                                | care integration (i.e., service integration)                                                               | care integration         | clinical integration                            |                                            |
|     | (32)                                                                   |                                   |      |             |                                                                                                                                                                         |                                  |                                                                                                                                                                      |                  |                                                 |                                                                                                                            |                                                                                                            |                          |                                                 |                                            |

|     | Index Instrument<br>(209 index instruments;<br>379 validation studies) | Reference Study<br>(300 articles) | Year | Country     | Purpose of instrument                                                                                                             | Type of respondent | Sample population                                                                                                                                                       | Language  | Description of version, items, and subscales                                                                                                                                                                                                                                                                                                                                                                                                                                                                                                                                                                                                                                                                                                                                                                                                                                                                                                                                                                                                                                                                                                                                                                                                                                                                                                                                                                                                                                                 | Response options                                                                                                                                                                       | Construct purported to measure                      | Construct classification             | Domain classification    | Remarks                                    |
|-----|------------------------------------------------------------------------|-----------------------------------|------|-------------|-----------------------------------------------------------------------------------------------------------------------------------|--------------------|-------------------------------------------------------------------------------------------------------------------------------------------------------------------------|-----------|----------------------------------------------------------------------------------------------------------------------------------------------------------------------------------------------------------------------------------------------------------------------------------------------------------------------------------------------------------------------------------------------------------------------------------------------------------------------------------------------------------------------------------------------------------------------------------------------------------------------------------------------------------------------------------------------------------------------------------------------------------------------------------------------------------------------------------------------------------------------------------------------------------------------------------------------------------------------------------------------------------------------------------------------------------------------------------------------------------------------------------------------------------------------------------------------------------------------------------------------------------------------------------------------------------------------------------------------------------------------------------------------------------------------------------------------------------------------------------------------|----------------------------------------------------------------------------------------------------------------------------------------------------------------------------------------|-----------------------------------------------------|--------------------------------------|--------------------------|--------------------------------------------|
| 76. | Consumer Quality Index (CQI)                                           | Berendsen, A. J. <sup>60</sup>    | 2009 | Netherlands | To assess aspects of the collaboration between GPs and specialists from patients' perspective                                     | patients           | patients who had been admitted to hospital answered questions on their experiences at discharge from the hospital                                                       | English** | definitive questionnaire has 22 items divided into four domains (i.e. GP Approach; GP Referral; Specialist; Collaboration) - preliminary questionnaire had 36 items                                                                                                                                                                                                                                                                                                                                                                                                                                                                                                                                                                                                                                                                                                                                                                                                                                                                                                                                                                                                                                                                                                                                                                                                                                                                                                                          | other majority of items used the Likert scale; a few were binary; and one item was a scale of 0-10                                                                                     | care continuity                                     | care integration                     | clinical integration     |                                            |
| 77. |                                                                        | Booij, J. C. <sup>61</sup>        | 2013 | Netherlands | A standardized measure of patient experience; to measure both preferences and experiences of patients with all types of cancer    | patients           | patients, ever diagnosed with cancer, who received cancer care in any hospital in the Netherlands, or in a specialized cancer center in the last two years              | English   | 110 items (82 on patient experiences) – Importance Scale                                                                                                                                                                                                                                                                                                                                                                                                                                                                                                                                                                                                                                                                                                                                                                                                                                                                                                                                                                                                                                                                                                                                                                                                                                                                                                                                                                                                                                     | rating scale "Scale of 1 to 4 (except grades): 'never-sometimes-usually-always', 'no not at all-somewhat-largely-yes completely', 'none-some-most-all'; or one through ten for grades" | care continuity                                     | care integration                     | clinical integration     | different subscales                        |
| 78. |                                                                        | Booij, J. C.                      | 2013 | Netherlands | A standardized measure of patient experience; to measure both preferences and experiences of patients with all types of cancer    | patients           | patients, ever diagnosed with cancer, who received cancer care in any hospital in the Netherlands, or in a specialized cancer center in the last two years              | English   | 110 items (83 on patient experience) – Experience Scale                                                                                                                                                                                                                                                                                                                                                                                                                                                                                                                                                                                                                                                                                                                                                                                                                                                                                                                                                                                                                                                                                                                                                                                                                                                                                                                                                                                                                                      | rating scale "Scale of 1 to 4 (except grades): 'never-sometimes-usually-always', 'no not at all-somewhat-largely-yes completely', 'none-some-most-all'; or one through ten for grades" | care continuity                                     | care integration                     | clinical integration     | different subscales                        |
| 79. |                                                                        | Damman, O. C. <sup>62</sup>       | 2009 | Netherlands | To measure quality of care from the perspective of patients with (suspicion of) breast cancer                                     | patients           | Inclusion criteria were (1) being older than 18 years; (2) having received breast care in the last 24 months; and (3) not being approached in the past for CQI surveys. | Dutch     | 152 items (118 are related to patient experience)<br><br>a) General items are items that do not measure specific patient experiences, but more general aspects related to the content of the clinical pathway; b) Time schedule items are items on patients' reports of promptness of healthcare and of the availability of results; c) Experience items (1–2) are items on whether or not (yes, no) quality criteria are met according to patient; d) Experience items (1–4) are items on the frequency (never, sometimes, usually and always) with which quality criteria are met according to patients; e) Skip items are items that refer to another question when follow-up items are not applicable; f) Global ratings are items on a global evaluation of healthcare and healthcare providers on a scale from zero to ten; g) Opinion items are items on patients' evaluation of healthcare outcomes; h) Outcome items are items on healthcare outcomes; i) Experience items (1–3) are items on how much of a problem (a big problem, a small problem and no problem) certain aspects of care, related to accessibility, are to patients; j) An importance item was formulated, but this item concerned more than one experience items. For example, one item on rapid availability of research results (instead of items on all specific examinations separately) and one item on conduct of healthcare professionals (instead of items on all specialized professionals separately) | other                                                                                                                                                                                  | care continuity                                     | care integration                     | professional integration |                                            |
| 80. |                                                                        | Howie <sup>63</sup>               | 2000 | UK          | Component of packages attempting to audit quality of care                                                                         | patients           |                                                                                                                                                                         | English   | 3 components: enablement score, consultation length, % of patients who know their doctor very well                                                                                                                                                                                                                                                                                                                                                                                                                                                                                                                                                                                                                                                                                                                                                                                                                                                                                                                                                                                                                                                                                                                                                                                                                                                                                                                                                                                           | rating scale 5-point Likert scale                                                                                                                                                      | care continuity (i.e., personal continuity of care) | care integration                     | clinical integration     |                                            |
| 81. |                                                                        | Stubbe <sup>64</sup>              | 2007 | Netherlands | To measure patients' experiences with quality of care after a cataract operation.                                                 | patients           |                                                                                                                                                                         | Dutch     | 41 items                                                                                                                                                                                                                                                                                                                                                                                                                                                                                                                                                                                                                                                                                                                                                                                                                                                                                                                                                                                                                                                                                                                                                                                                                                                                                                                                                                                                                                                                                     | rating scale                                                                                                                                                                           | patient-centered care                               | care integration                     | clinical integration     | different number of items (item reduction) |
| 82. |                                                                        | Stubbe <sup>65</sup>              | 2007 | Netherlands | To assess patients' experiences with and evaluations of quality of care after a total hip (THA) or total knee arthroplasty (TKA). | patients           |                                                                                                                                                                         | Dutch     | 21 items                                                                                                                                                                                                                                                                                                                                                                                                                                                                                                                                                                                                                                                                                                                                                                                                                                                                                                                                                                                                                                                                                                                                                                                                                                                                                                                                                                                                                                                                                     | rating scale                                                                                                                                                                           | patient-centered care                               | care integration                     | clinical integration     | different number of items (item reduction) |
| 83. |                                                                        | Triemstra <sup>66</sup>           | 2010 | Netherlands | To measure client experiences with long-term care in the Netherlands                                                              | patients           |                                                                                                                                                                         | Dutch     | 83 items                                                                                                                                                                                                                                                                                                                                                                                                                                                                                                                                                                                                                                                                                                                                                                                                                                                                                                                                                                                                                                                                                                                                                                                                                                                                                                                                                                                                                                                                                     | rating scale                                                                                                                                                                           | care integration                                    | care integration                     | clinical integration     | different number of items (item reduction) |
| 84. |                                                                        | Triemstra <sup>66</sup>           | 2010 | Netherlands | To measure client experiences with long-term care in the Netherlands                                                              | patients           |                                                                                                                                                                         | Dutch     | 76 items                                                                                                                                                                                                                                                                                                                                                                                                                                                                                                                                                                                                                                                                                                                                                                                                                                                                                                                                                                                                                                                                                                                                                                                                                                                                                                                                                                                                                                                                                     | rating scale                                                                                                                                                                           | care integration                                    | care integration                     | clinical integration     | different number of items (item reduction) |
| 85. |                                                                        | Triemstra <sup>66</sup>           | 2010 | Netherlands | To measure client experiences with long-term care in the Netherlands                                                              | patients           |                                                                                                                                                                         | Dutch     | 117 items                                                                                                                                                                                                                                                                                                                                                                                                                                                                                                                                                                                                                                                                                                                                                                                                                                                                                                                                                                                                                                                                                                                                                                                                                                                                                                                                                                                                                                                                                    | rating scale                                                                                                                                                                           | care integration                                    | care integration                     | clinical integration     | different number of items (item reduction) |
|     | (33)                                                                   |                                   |      |             |                                                                                                                                   |                    |                                                                                                                                                                         |           |                                                                                                                                                                                                                                                                                                                                                                                                                                                                                                                                                                                                                                                                                                                                                                                                                                                                                                                                                                                                                                                                                                                                                                                                                                                                                                                                                                                                                                                                                              |                                                                                                                                                                                        |                                                     |                                      |                          |                                            |
| 86. | Continuity of Care - User Measure (CONTINUUM)                          | Rose, D. <sup>67</sup>            | 2009 | UK          | To assess continuity of care                                                                                                      | patients           |                                                                                                                                                                         | English** | 51 items; 17 domains with 3 items each                                                                                                                                                                                                                                                                                                                                                                                                                                                                                                                                                                                                                                                                                                                                                                                                                                                                                                                                                                                                                                                                                                                                                                                                                                                                                                                                                                                                                                                       | rating scale                                                                                                                                                                           | care continuity                                     | care continuity / comprehensive care | clinical integration     | different studies                          |

|     | Index Instrument<br>(209 index instruments;<br>379 validation studies)  | Reference Study<br>(300 articles) | Year | Country | Purpose of instrument                                                                                                                                                                                              | Type of<br>respondent | Sample population                                                                                                                                                                                                                            | Language                                     | Description of version, items, and<br>subscales                                                                                                                                                                                                             | Response options                                                                                                                                                | Construct purported to measure                                                                | Construct classification             | Domain<br>classification                                                             | Remarks                      |
|-----|-------------------------------------------------------------------------|-----------------------------------|------|---------|--------------------------------------------------------------------------------------------------------------------------------------------------------------------------------------------------------------------|-----------------------|----------------------------------------------------------------------------------------------------------------------------------------------------------------------------------------------------------------------------------------------|----------------------------------------------|-------------------------------------------------------------------------------------------------------------------------------------------------------------------------------------------------------------------------------------------------------------|-----------------------------------------------------------------------------------------------------------------------------------------------------------------|-----------------------------------------------------------------------------------------------|--------------------------------------|--------------------------------------------------------------------------------------|------------------------------|
| 87. |                                                                         | Sweeney, A. <sup>68</sup>         | 2012 | UK      | To assess continuity of care in a group of psychotic patients                                                                                                                                                      | patients              | patients with psychosis                                                                                                                                                                                                                      | English                                      | 16 items; access; range; waiting; out of hours support; hospital discharge; staff changes; information; flexibility; individual progress; day centers; care plans; crisis systems; staff communication; peer support; life histories; and avoiding services | rating scale                                                                                                                                                    | care continuity                                                                               | care continuity / comprehensive care | clinical integration                                                                 | different studies            |
|     | (34)                                                                    |                                   |      |         |                                                                                                                                                                                                                    |                       |                                                                                                                                                                                                                                              |                                              |                                                                                                                                                                                                                                                             |                                                                                                                                                                 |                                                                                               |                                      |                                                                                      |                              |
| 88. | Continuity of Care in Children's Mental Health (C3MH)                   | Tobon, J. I. <sup>69</sup>        | 2013 | Canada  | To assess the continuity of care in children mental health                                                                                                                                                         | informal caregivers   | parents of children with mental illness whom had at least 3 face to face visits in the previous year                                                                                                                                         | English                                      | 25 items; 42 core items, and three additional "modules" related to: having multiple providers, experiencing a change in provider and being discharged, which only some parents and youth seen at a CMH agency would complete                                | rating scale                                                                                                                                                    | care continuity                                                                               | care continuity / comprehensive care | clinical integration                                                                 | different type of respondent |
| 89. |                                                                         | Tobon, J. I. <sup>69</sup>        | 2013 | Canada  | To assess the continuity of care in children mental health                                                                                                                                                         | patients              | youth receiving care from the mental health agencies                                                                                                                                                                                         | English                                      | 25 items; 42 core items, and three additional "modules" related to: having multiple providers, experiencing a change in provider and being discharged, which only some parents and youth seen at a CMH agency would complete                                | rating scale                                                                                                                                                    | care continuity                                                                               | care continuity / comprehensive care | clinical integration                                                                 | different type of respondent |
|     | (35)                                                                    |                                   |      |         |                                                                                                                                                                                                                    |                       |                                                                                                                                                                                                                                              |                                              |                                                                                                                                                                                                                                                             |                                                                                                                                                                 |                                                                                               |                                      |                                                                                      |                              |
| 90. | Continuity of Care Measure (CCM)                                        | Haggerty, J. L. <sup>70</sup>     | 2012 | Canada  | A generic measure of management continuity from the patient perspective                                                                                                                                            | patients              | adult patients aged 25 to 75 years, recruited in waiting rooms of 6 primary care clinics; had received care for the same health condition at more than one place in the last year and expected to continue to do so during the next 6 months | French and English                           | initial original - 80 items; refined tool - 37 items on 9 dimensions of continuity, as well as indicators of continuity problems                                                                                                                            | rating scale<br>5-point Likert response options; some were collapsed to 3-point scales after initial analysis                                                   | care continuity (i.e., management, relational and informational continuity)                   | care continuity / comprehensive care | combination (i.e., functional, organizational, and clinical integration)             |                              |
|     | (36)                                                                    |                                   |      |         |                                                                                                                                                                                                                    |                       |                                                                                                                                                                                                                                              |                                              |                                                                                                                                                                                                                                                             |                                                                                                                                                                 |                                                                                               |                                      |                                                                                      |                              |
| 91. | Continuity of Care Practices Survey                                     | Schaefer, J. A. <sup>71</sup>     | 2004 | USA     | To measure continuity of care services that primary counselor/case managers reported each individual patients received/ were expected to receive during the transition from intensive treatment to continuing care | healthcare providers  | program staff of counselor/case managers reported of individual patients                                                                                                                                                                     | English                                      | CCPS-P; 23 items                                                                                                                                                                                                                                            | rating scale                                                                                                                                                    | care continuity                                                                               | care continuity / comprehensive care | clinical integration                                                                 | different sample             |
| 92. |                                                                         | Schaefer, J. A. <sup>71</sup>     | 2004 | USA     | To measure directors' perceptions of 4 program level continuity of care dimension                                                                                                                                  | healthcare providers  | director of the program                                                                                                                                                                                                                      | English**                                    | CCPS-I; 23 items (provide continuity, maintain contact, connect to resources, care coordination)                                                                                                                                                            | rating scale                                                                                                                                                    | care continuity                                                                               | care continuity / comprehensive care | clinical integration                                                                 | different sample             |
|     | (37)                                                                    |                                   |      |         |                                                                                                                                                                                                                    |                       |                                                                                                                                                                                                                                              |                                              |                                                                                                                                                                                                                                                             |                                                                                                                                                                 |                                                                                               |                                      |                                                                                      |                              |
| 93. | Coordination of Handoff Effectiveness Questionnaire (CHEQ)              | Block, M. <sup>72</sup>           | 2013 | USA     | To measure the quality of handoff interactions in labor and delivery                                                                                                                                               | healthcare providers  | nurses                                                                                                                                                                                                                                       | English                                      | 56 items                                                                                                                                                                                                                                                    | rating scale<br>1-5 Likert scale; (1 =strongly disagree, 2 =disagree, 3 =neutral, 4 = agree, 5 = strongly agree), with an additional option of "not applicable" | care coordination (i.e., information and process quality in handoff)                          | care continuity / comprehensive care | combination (i.e., professional and organizational)                                  |                              |
|     | (38)                                                                    |                                   |      |         |                                                                                                                                                                                                                    |                       |                                                                                                                                                                                                                                              |                                              |                                                                                                                                                                                                                                                             |                                                                                                                                                                 |                                                                                               |                                      |                                                                                      |                              |
| 94. | CPSO Peer Assessment                                                    | Wenghofer, E. F. <sup>73</sup>    | 2006 | Canada  | To assess physicians' performance                                                                                                                                                                                  | healthcare providers  | physician peer                                                                                                                                                                                                                               | English**                                    | 46 items                                                                                                                                                                                                                                                    | rating scale                                                                                                                                                    | patient-centered care                                                                         | care integration                     | clinical integration                                                                 |                              |
|     | (39)                                                                    |                                   |      |         |                                                                                                                                                                                                                    |                       |                                                                                                                                                                                                                                              |                                              |                                                                                                                                                                                                                                                             |                                                                                                                                                                 |                                                                                               |                                      |                                                                                      |                              |
| 95. | Cuestionario Continuidad Asistencial Entre Niveles de Atención (CCAENA) | Aller, M. B. <sup>74</sup>        | 2013 | Spain   | To comprehensively assess continuity of care across care levels from the users' perspective                                                                                                                        | patients              | received primary and secondary care in the study areas for the same condition in the three months prior to the survey; must understand or communicate effectively                                                                            | Spanish                                      | 29 items (second section assessed for psychometric properties)                                                                                                                                                                                              | rating scale                                                                                                                                                    | care continuity                                                                               | care continuity / comprehensive care | combination (i.e., subscales related to clinical, functional and system integration) |                              |
|     | (40)                                                                    |                                   |      |         |                                                                                                                                                                                                                    |                       |                                                                                                                                                                                                                                              |                                              |                                                                                                                                                                                                                                                             |                                                                                                                                                                 |                                                                                               |                                      |                                                                                      |                              |
| 96. | Cultural competence assessment instrument                               | Doorenbos <sup>75</sup>           | 2005 | USA     | To measure provider cultural competence; measure cultural diversity experience, cultural awareness and sensitivity, and cultural competence behaviors                                                              | healthcare providers  | hospice and healthcare provider                                                                                                                                                                                                              | English                                      | 38 items                                                                                                                                                                                                                                                    | rating scale<br>5-point Likert                                                                                                                                  | patient-centered care                                                                         | patient-centered care                | clinical integration                                                                 |                              |
|     | (41)                                                                    |                                   |      |         |                                                                                                                                                                                                                    |                       |                                                                                                                                                                                                                                              |                                              |                                                                                                                                                                                                                                                             |                                                                                                                                                                 |                                                                                               |                                      |                                                                                      |                              |
| 97. | DELTA service user assessment                                           | Ahgren, B. <sup>76</sup>          | 2009 | Sweden  | To assess service integration                                                                                                                                                                                      | patients              | service users of DELTA project (in Swedish 'delta' means to participate)                                                                                                                                                                     | Swedish (assumed to be developed in Swedish) | 32 items                                                                                                                                                                                                                                                    | other ordinal scales and open questions where used for the assessment                                                                                           | care integration (i.e., integration (dimensions of integration: structure, process, outcome)) | care integration                     | clinical integration                                                                 |                              |
|     | (42)                                                                    |                                   |      |         |                                                                                                                                                                                                                    |                       |                                                                                                                                                                                                                                              |                                              |                                                                                                                                                                                                                                                             |                                                                                                                                                                 |                                                                                               |                                      |                                                                                      |                              |



|      | Index Instrument<br>(209 index instruments;<br>379 validation studies) | Reference Study<br>(300 articles) | Year | Country            | Purpose of instrument                                                                                                                                                       | Type of respondent                       | Sample population                                                                                                                                                                                          | Language           | Description of version, items, and subscales                                                                                                         | Response options                                                                                                                       | Construct purported to measure                                                  | Construct classification             | Domain classification                                                                                                               | Remarks                   |
|------|------------------------------------------------------------------------|-----------------------------------|------|--------------------|-----------------------------------------------------------------------------------------------------------------------------------------------------------------------------|------------------------------------------|------------------------------------------------------------------------------------------------------------------------------------------------------------------------------------------------------------|--------------------|------------------------------------------------------------------------------------------------------------------------------------------------------|----------------------------------------------------------------------------------------------------------------------------------------|---------------------------------------------------------------------------------|--------------------------------------|-------------------------------------------------------------------------------------------------------------------------------------|---------------------------|
| 98.  | Diabetes Continuity of Care Scale (DCCS)                               | Dolovich, L. R. <sup>77</sup>     | 2004 | Canada             | To measure continuity of care beyond that of more traditional measures                                                                                                      | patients and healthcare providers        | The number of healthcare provider participants was much smaller than the patient sample, but was included to broaden insight into patient-focused continuity of care issues from the provider perspective. | English            | 76 items to 56 items (item reduction)                                                                                                                | rating scale<br>Patients were asked to score each item on a five-point scale that ranged from 'strongly disagree' to 'strongly agree'. | care continuity                                                                 | care continuity / comprehensive care | clinical integration                                                                                                                |                           |
|      | (43)                                                                   |                                   |      |                    |                                                                                                                                                                             |                                          |                                                                                                                                                                                                            |                    |                                                                                                                                                      |                                                                                                                                        |                                                                                 |                                      |                                                                                                                                     |                           |
| 99.  | Distrust of the healthcare system (DHS)                                | Katapodi <sup>78</sup>            | 2010 | USA                | A measure of distrust                                                                                                                                                       | patients                                 |                                                                                                                                                                                                            | English            | 4 items                                                                                                                                              | rating scale<br>4-point Likert type scale                                                                                              | other: distrust                                                                 | patient-centered care                | clinical integration                                                                                                                |                           |
|      | (44)                                                                   |                                   |      |                    |                                                                                                                                                                             |                                          |                                                                                                                                                                                                            |                    |                                                                                                                                                      |                                                                                                                                        |                                                                                 |                                      |                                                                                                                                     |                           |
| 100. | Doctor-Patient Scale                                                   | de Monchy <sup>79</sup>           | 1988 | UK                 | An attitude scale capable of objectively comparing individual attitudes                                                                                                     | others                                   | medical students, trainees and registrars                                                                                                                                                                  | English            | 48 statements                                                                                                                                        | rating scale<br>5-point scale (strongly disagree to strongly agree)                                                                    | patient-centered care                                                           | patient-centered care                | clinical integration                                                                                                                |                           |
|      | (45)                                                                   |                                   |      |                    |                                                                                                                                                                             |                                          |                                                                                                                                                                                                            |                    |                                                                                                                                                      |                                                                                                                                        |                                                                                 |                                      |                                                                                                                                     |                           |
| 101. | Dual Diagnosis Capability in Healthcare Settings (DDCHCS)              | McGovern, M. P. <sup>80</sup>     | 2012 | USA                | To assess the degree to which an organization offers integrated behavioral health care services, both mental health and substance abuse within traditional medical settings | others: organization level assessment    | DDCHC assessment teams, assessment was conducted at the organizational level                                                                                                                               | English**          | 36 items                                                                                                                                             | rating scale                                                                                                                           | care integration                                                                | care integration                     | clinical integration                                                                                                                |                           |
|      | (46)                                                                   |                                   |      |                    |                                                                                                                                                                             |                                          |                                                                                                                                                                                                            |                    |                                                                                                                                                      |                                                                                                                                        |                                                                                 |                                      |                                                                                                                                     |                           |
| 102. | Embedded Patient-Centered Care Scale                                   | Wilkerson, L. <sup>81</sup>       | 2010 | USA                | To assess medical students PCC skills                                                                                                                                       | others: medical students                 | medical students                                                                                                                                                                                           | English**          | 20 items                                                                                                                                             | dichotomous scale                                                                                                                      | patient-centered care                                                           | patient-centered care                | clinical integration                                                                                                                |                           |
|      | (47)                                                                   |                                   |      |                    |                                                                                                                                                                             |                                          |                                                                                                                                                                                                            |                    |                                                                                                                                                      |                                                                                                                                        |                                                                                 |                                      |                                                                                                                                     |                           |
| 103. | ENDOCARE questionnaire (ECQ)                                           | Dancet, E. A. <sup>82</sup>       | 2011 | Multiple Countries | To measure the patient-centeredness of endometriosis care in Europe                                                                                                         | patients                                 | Patients were invited by tertiary endometriosis clinics disseminating information sheets and by patients' association sending emails to their members and posting a link to the ECQ on their website.      | English            | 43 specific statements organized according to the 10 dimensions                                                                                      | other<br>two 4-point Likert response scales with open-ended questions                                                                  | patient-centered care                                                           | patient-centered care                | clinical integration                                                                                                                |                           |
|      | (48)                                                                   |                                   |      |                    |                                                                                                                                                                             |                                          |                                                                                                                                                                                                            |                    |                                                                                                                                                      |                                                                                                                                        |                                                                                 |                                      |                                                                                                                                     |                           |
| 104. | <b>EUROPEP</b>                                                         | Beaulieu, M. D. <sup>39</sup>     | 2011 | Canada             | To rate care by GP                                                                                                                                                          | patients                                 | healthcare users balanced by English/ French language, rural/urban location, low/high level of education and poor/average/excellent overall PHC experience                                                 | French/<br>English | 10 out of 15 items on communication                                                                                                                  | semantic differential<br>semantic differential rating, 1=poor, 5=excellent                                                             | patient-centered care (i.e., not specific to interpersonal communication)       | patient-centered care                | clinical integration                                                                                                                |                           |
| 105. |                                                                        | Haggerty <sup>43</sup>            | 2011 | Canada             | Mapped attributes: accessibility and interpersonal communication                                                                                                            | patients                                 |                                                                                                                                                                                                            | French/<br>English | Item distribution: accessibility (7), interpersonal communication (16), comprehensive services (6)                                                   | rating scale<br>1 to 5 scale                                                                                                           | multiple constructs: care continuity, patient-centered care, comprehensive care | care integration                     | combination (i.e., clinical and organizational)                                                                                     | different response scales |
| 106. |                                                                        | Haggerty <sup>83</sup>            | 2011 | Canada             | To measure organization of care                                                                                                                                             | patients                                 | healthcare users                                                                                                                                                                                           | French/<br>English | 7 items                                                                                                                                              | semantic differential<br>5-point semantic differential scale                                                                           | care coordination (i.e., organization of care)                                  | care continuity / comprehensive care | organizational integration                                                                                                          | different response scales |
|      | (49)                                                                   |                                   |      |                    |                                                                                                                                                                             |                                          |                                                                                                                                                                                                            |                    |                                                                                                                                                      |                                                                                                                                        |                                                                                 |                                      |                                                                                                                                     |                           |
| 107. | Experienced continuity of care for diabetes mellitus (ECC-DM)          | Gulliford, M. C. <sup>84</sup>    | 2006 | UK                 | To evaluate patient-centered outcomes of diabetes care                                                                                                                      | patients                                 | patients with type 2 diabetes who were registered with 19 family practices in London                                                                                                                       | English            | 19 items, 4 subdomains: longitudinal continuity (LC), flexible continuity (FC), relational continuity (RC), team and cross-boundary continuity (TCB) | rating scale<br>Likert-type scales, each of which had 6 response options                                                               | care continuity                                                                 | care continuity / comprehensive care | Other: longitudinal continuity (LC), flexible continuity (FC), relational continuity (RC), team and cross-boundary continuity (TCB) |                           |
|      | (50)                                                                   |                                   |      |                    |                                                                                                                                                                             |                                          |                                                                                                                                                                                                            |                    |                                                                                                                                                      |                                                                                                                                        |                                                                                 |                                      |                                                                                                                                     |                           |
| 108. | Facilitation of Patient Involvement Scale (FPI)                        | Martin <sup>85</sup>              | 2001 | USA                | To measure degree to which individuals perceive that their physicians encourage their involvement in their own healthcare.                                                  | patients                                 |                                                                                                                                                                                                            | English**          | 9 items                                                                                                                                              | rating scale                                                                                                                           | other: physician and patient communication                                      | patient-centered care                | clinical integration                                                                                                                | different samples         |
| 109. |                                                                        | Martin <sup>85</sup>              | 2001 | USA                | To measure degree to which individuals perceive that their physicians encourage their involvement in their own healthcare.                                                  | others: school faculty members and staff | members of the faculty and staff in Southern California School District                                                                                                                                    | English**          | 9 items                                                                                                                                              | rating scale                                                                                                                           | other: physician and patient communication                                      | patient-centered care                | clinical integration                                                                                                                | different samples         |
| 110. |                                                                        | Martin <sup>85</sup>              | 2001 | USA                | To measure degree to which individuals perceive that their physicians encourage their involvement in their own healthcare.                                                  | patients                                 |                                                                                                                                                                                                            | English**          | 9 items                                                                                                                                              | rating scale                                                                                                                           | other: physician and patient communication                                      | patient-centered care                | clinical integration                                                                                                                | different samples         |
| 111. |                                                                        | Martin <sup>85</sup>              | 2001 | USA                | To measure degree to which individuals perceive that their physicians encourage their involvement in their own healthcare.                                                  | patients                                 |                                                                                                                                                                                                            | English**          | 9 items                                                                                                                                              | rating scale                                                                                                                           | other: physician and patient communication                                      | patient-centered care                | clinical integration                                                                                                                | different samples         |
|      | (51)                                                                   |                                   |      |                    |                                                                                                                                                                             |                                          |                                                                                                                                                                                                            |                    |                                                                                                                                                      |                                                                                                                                        |                                                                                 |                                      |                                                                                                                                     |                           |

|      | Index Instrument<br>(209 index instruments;<br>379 validation studies) | Reference Study<br>(300 articles) | Year | Country     | Purpose of instrument                                                                                                                                                                                                                                                                                               | Type of<br>respondent  | Sample population                                                                                                                                       | Language  | Description of version, items, and<br>subscales                                                                                                                                                                                                                                                                                    | Response options                                                                                                                                                                                                 | Construct purported to measure                                                                                               | Construct classification             | Domain<br>classification | Remarks                                                            |
|------|------------------------------------------------------------------------|-----------------------------------|------|-------------|---------------------------------------------------------------------------------------------------------------------------------------------------------------------------------------------------------------------------------------------------------------------------------------------------------------------|------------------------|---------------------------------------------------------------------------------------------------------------------------------------------------------|-----------|------------------------------------------------------------------------------------------------------------------------------------------------------------------------------------------------------------------------------------------------------------------------------------------------------------------------------------|------------------------------------------------------------------------------------------------------------------------------------------------------------------------------------------------------------------|------------------------------------------------------------------------------------------------------------------------------|--------------------------------------|--------------------------|--------------------------------------------------------------------|
| 112. | Family Assessment of Treatment at End of Life                          | Casarett <sup>86</sup>            | 2008 | USA         | A nationwide quality measure in the VA health care system; to assess the quality of end-of-life care in a population without respect to payer, site of care, or site of death                                                                                                                                       | informal caregivers    | family of deceased patient                                                                                                                              | English   | final: 32 items (9 domains)                                                                                                                                                                                                                                                                                                        | rating scale<br>4-point scale                                                                                                                                                                                    | patient-centered care (i.e., information and communication, patient-centeredness, access to services and benefits)           | patient-centered care                | clinical integration     |                                                                    |
|      | (52)                                                                   |                                   |      |             |                                                                                                                                                                                                                                                                                                                     |                        |                                                                                                                                                         |           |                                                                                                                                                                                                                                                                                                                                    |                                                                                                                                                                                                                  |                                                                                                                              |                                      |                          |                                                                    |
| 113. | Family perceived involvement (F-INVOKE)                                | Reid <sup>87</sup>                | 2007 | Canada      | To measure the extent to which facilities involved family members in the care of their loved ones                                                                                                                                                                                                                   | informal caregivers    |                                                                                                                                                         | English   | 20 items                                                                                                                                                                                                                                                                                                                           | rating scale                                                                                                                                                                                                     | other: trust, involvement in care                                                                                            | patient-centered care                | clinical integration     |                                                                    |
|      | (53)                                                                   |                                   |      |             |                                                                                                                                                                                                                                                                                                                     |                        |                                                                                                                                                         |           |                                                                                                                                                                                                                                                                                                                                    |                                                                                                                                                                                                                  |                                                                                                                              |                                      |                          |                                                                    |
| 114. | Four Habits Coding Scheme (4HCS)                                       | Clayton, M. F. <sup>88</sup>      | 2011 | USA         | To teach and evaluate provider communication behaviors that are associated with adaptive patient outcomes and patient-centered care overall                                                                                                                                                                         | others: student coders | student coders conducting the verbal coding; sample of patient-provider videotapes                                                                      | English   | 23 behaviors grouped into four conceptual domains (or desired habits)                                                                                                                                                                                                                                                              | rating scale<br>Coders are encouraged to use ratings of 1, 3, and 5 (anchored with evaluative components of the habit) and only use 2 or 4 to rate provider behaviors that clearly fall between anchors.         | patient-centered care                                                                                                        | patient-centered care                | clinical integration     |                                                                    |
| 115. |                                                                        | Krupat <sup>89</sup>              | 2006 | USA         | To assess the communication skills of physicians                                                                                                                                                                                                                                                                    | others: observer/coder | coders were health profession students                                                                                                                  | English   | 23 behaviors                                                                                                                                                                                                                                                                                                                       | rating scale                                                                                                                                                                                                     | other: physician-patient communication                                                                                       | patient-centered care                | clinical integration     |                                                                    |
|      | (54)                                                                   |                                   |      |             |                                                                                                                                                                                                                                                                                                                     |                        |                                                                                                                                                         |           |                                                                                                                                                                                                                                                                                                                                    |                                                                                                                                                                                                                  |                                                                                                                              |                                      |                          |                                                                    |
| 116. | General Practice Assessment Questionnaire (GPAQ)                       | Jaturapatporn, D. <sup>90</sup>   | 2006 | Thailand    | Patient questionnaire to evaluate primary care in a number of key areas ranging from the access to care, the helpfulness of receptionists, the continuity of care, the doctors' communication skills, the patient's knowledge of self, the general practice care plans after consultation, and overall satisfaction | patients               | patients who visited the Department of Family Medicine in October 2005 were included                                                                    | Thai      | 19 items; 7 multi-item scales                                                                                                                                                                                                                                                                                                      | other combination of rating scales and open text response                                                                                                                                                        | patient satisfaction (i.e., continuity of care, comprehensive care, accessibility)                                           | care integration                     | clinical integration     |                                                                    |
| 117. |                                                                        | Mead <sup>91</sup>                | 2008 | UK          | To assess GP performance post consultation                                                                                                                                                                                                                                                                          | patients               |                                                                                                                                                         | English   | 25 items                                                                                                                                                                                                                                                                                                                           | rating scale                                                                                                                                                                                                     | care integration                                                                                                             | care integration                     | clinical integration     | different number of items (item reduction)                         |
| 118. |                                                                        | Mead <sup>91</sup>                | 2008 | UK          | To assess GP performance at home                                                                                                                                                                                                                                                                                    | patients               |                                                                                                                                                         | English   | 33 items                                                                                                                                                                                                                                                                                                                           | rating scale                                                                                                                                                                                                     | care integration                                                                                                             | care integration                     | clinical integration     | different number of items (item reduction)                         |
| 119. | New Zealand General Practice Assessment Questionnaire                  | Zwier, G. <sup>92</sup>           | 2013 | New Zealand | To assess the quality of care provided by primary care providers (questions about access, inter-personal aspects of care and continuity of care)                                                                                                                                                                    | patients               | patients at the GP                                                                                                                                      | English** | Not reported; focuses mainly on questions about access, inter-personal aspects of care and continuity of care; the basic layout, sequence and formulation of the questions and response categories in the original GPAQ are maintained; 3 questions concern "after hours services"; overall satisfaction question is also included | rating scale                                                                                                                                                                                                     | patient-centered care                                                                                                        | care integration                     | clinical integration     |                                                                    |
|      | (55)                                                                   |                                   |      |             |                                                                                                                                                                                                                                                                                                                     |                        |                                                                                                                                                         |           |                                                                                                                                                                                                                                                                                                                                    |                                                                                                                                                                                                                  |                                                                                                                              |                                      |                          |                                                                    |
| 120. | General Practice Assessment Survey (GPAS)                              | Jayasinghe, U. W. <sup>93</sup>   | 2008 | Australia   | A multi-item self-report questionnaire which measures several dimensions relating to patients' assessment of general practice (mainly access of care and patient-centeredness)                                                                                                                                      | patients               | patients from GP clinics                                                                                                                                | English   | 18 items on 'Access of care' and 'Patient-centeredness' (patient satisfaction on these domains)                                                                                                                                                                                                                                    | Other: Only assessment items are used in the calculation of scale scores and assessment items are measured on 6 point scales. Scale scores (ranging from 0 to 100) were computed in accord with the GPAS manual. | patient satisfaction (i.e., patient satisfaction with accessibility and patient centeredness)                                | care integration                     | clinical integration     |                                                                    |
| 121. |                                                                        | Ramsay, J. <sup>94</sup>          | 2000 | UK          | To measure the level of primary care activity                                                                                                                                                                                                                                                                       | patients               |                                                                                                                                                         | English** | 53 items                                                                                                                                                                                                                                                                                                                           | not reported                                                                                                                                                                                                     | multiple constructs (i.e., access, continuity of care, communication, interpersonal care, trust, coordination, nursing care) | care integration                     | clinical integration     |                                                                    |
| 122. |                                                                        | Bower <sup>95</sup>               | 2002 | UK          | To measure separate dimensions relating to patients' views of general practice - access, continuity of care, communication, interpersonal care, GPS knowledge of patient, specialist referral, nursing, general satisfaction and enablement                                                                         | patients               | different patient surveys that used GPAS                                                                                                                | English   | 21 items                                                                                                                                                                                                                                                                                                                           | rating scale<br>6-point scale from very poor to excellent (with a does not apply option for some items); one item reverse coded                                                                                  | patient-centered care                                                                                                        | care integration                     | clinical integration     |                                                                    |
|      | (56)                                                                   |                                   |      |             |                                                                                                                                                                                                                                                                                                                     |                        |                                                                                                                                                         |           |                                                                                                                                                                                                                                                                                                                                    |                                                                                                                                                                                                                  |                                                                                                                              |                                      |                          |                                                                    |
| 123. | General practice clinical linkages interviews (GPC-LI)^                | Amoroso, C. <sup>96</sup>         | 2007 | Australia   | To measure the clinical linkages that a general practice maintains for the management of three common chronic diseases: asthma, type 2 diabetes, and hypertension                                                                                                                                                   | healthcare providers   | GPC-LI were completed by GP staff (practice principal and manager); the other tools which were not developed in the study were administered to patients | English   | 9-item tool (resulting); nine-item tool with three underlying factors: referral and advice linkages, shared care and care planning linkages, and community access and awareness linkages                                                                                                                                           | rating scale<br>0-5, with 5 representing the highest score                                                                                                                                                       | care continuity (i.e., clinical linkages)                                                                                    | care continuity / comprehensive care | clinical integration     | only tested for the main instrument measuring inter-organizational |

|      | Index Instrument<br>(209 index instruments;<br>379 validation studies) | Reference Study<br>(300 articles)          | Year | Country  | Purpose of instrument                                                                                                                                                                                             | Type of<br>respondent | Sample population                                                                                                                                  | Language            | Description of version, items, and<br>subscales                                       | Response options                                                                                                                                                         | Construct purported to measure                                | Construct classification             | Domain<br>classification                                  | Remarks                               |
|------|------------------------------------------------------------------------|--------------------------------------------|------|----------|-------------------------------------------------------------------------------------------------------------------------------------------------------------------------------------------------------------------|-----------------------|----------------------------------------------------------------------------------------------------------------------------------------------------|---------------------|---------------------------------------------------------------------------------------|--------------------------------------------------------------------------------------------------------------------------------------------------------------------------|---------------------------------------------------------------|--------------------------------------|-----------------------------------------------------------|---------------------------------------|
|      |                                                                        |                                            |      |          | ischemic heart disease; to assess the quality of chronic disease-related clinical linkages and relationships that exist between the practice as a whole and external providers and services                       |                       | practice and principal manager                                                                                                                     |                     |                                                                                       |                                                                                                                                                                          |                                                               |                                      |                                                           | linkages in general practice (GCP-LI) |
|      | (57)                                                                   |                                            |      |          |                                                                                                                                                                                                                   |                       |                                                                                                                                                    |                     |                                                                                       |                                                                                                                                                                          |                                                               |                                      |                                                           |                                       |
| 124. | General Practice Patient Survey                                        | Lyratzopoulos, G. <sup>97</sup>            | 2011 | USA      | To assess patients experience with the GP in England                                                                                                                                                              | patients              |                                                                                                                                                    | English**           | 45 items                                                                              | rating scale                                                                                                                                                             | patient-centered care                                         | care integration                     | clinical integration                                      |                                       |
|      | (58)                                                                   |                                            |      |          |                                                                                                                                                                                                                   |                       |                                                                                                                                                    |                     |                                                                                       |                                                                                                                                                                          |                                                               |                                      |                                                           |                                       |
| 125. | Geriatric Care Environment Scale (GCES)                                | Kim, H. <sup>98</sup>                      | 2007 | USA      | To assess the healthcare professional's perceptions of how care provided to older adults reflects age sensitive principles and the organization practice environment that supports or hinders care delivery       | healthcare providers  |                                                                                                                                                    | not reported        | 28 items                                                                              | rating scale                                                                                                                                                             | multiple constructs: care coordination, comprehensive care    | care integration                     | combination (i.e., clinical and professional integration) |                                       |
| 126. |                                                                        | Paulo de Almeida Tavares, J. <sup>99</sup> | 2013 | Portugal | To assess the nurses perception about the geriatric care environment                                                                                                                                              | healthcare providers  | registered nurses                                                                                                                                  | Portuguese          | 28 items                                                                              | rating scale                                                                                                                                                             | Other: geriatric care environment                             | care integration                     | functional integration                                    |                                       |
|      | (59)                                                                   |                                            |      |          |                                                                                                                                                                                                                   |                       |                                                                                                                                                    |                     |                                                                                       |                                                                                                                                                                          |                                                               |                                      |                                                           |                                       |
| 127. | Giving Youth a Voice questionnaire (GYV)                               | Gan, C. <sup>100</sup>                     | 2008 | Canada   | To measure youths' perceptions of rehabilitation services across four dimensions: supportive and respectful relationships, information sharing/communication, supporting independence, and teen-centered services | patients              | names provided by the rehabilitation center's Health Records Department                                                                            | English             | 56 items                                                                              | rating scale<br>the questionnaire adopts the same format and 7-point rating scale as the original MPOC                                                                   | patient-centered care                                         | patient-centered care                | clinical integration                                      |                                       |
|      | (60)                                                                   |                                            |      |          |                                                                                                                                                                                                                   |                       |                                                                                                                                                    |                     |                                                                                       |                                                                                                                                                                          |                                                               |                                      |                                                           |                                       |
| 128. | Group-Based Medical Mistrust Scale (GBMMS)                             | Thompson <sup>101</sup>                    | 2004 | USA      | To assess the tendency to distrust those who do not belong to one's ethnic group and/or distrust systems that do not represent one's ethnic group based upon a legacy of racism or unfair treatment.              | patients              |                                                                                                                                                    | English/<br>Spanish | 12 items                                                                              | rating scale                                                                                                                                                             | patient-centered care                                         | patient-centered care                | clinical integration                                      |                                       |
|      | (61)                                                                   |                                            |      |          |                                                                                                                                                                                                                   |                       |                                                                                                                                                    |                     |                                                                                       |                                                                                                                                                                          |                                                               |                                      |                                                           |                                       |
| 129. | Handoff clinical evaluation exercise (CEX)                             | Horwitz, L. I. <sup>102</sup>              | 2013 | USA      | To evaluate handoff quality                                                                                                                                                                                       | healthcare providers  | Nurse educators (evaluations of handoff providers)                                                                                                 | English**           | 10 items                                                                              | rating scale<br>9-point scale                                                                                                                                            | care coordination (i.e., handoff communication)               | care continuity / comprehensive care | combination (i.e., professional and organizational)       | different sample                      |
| 130. |                                                                        | Horwitz, L. I. <sup>102</sup>              | 2013 | USA      | To evaluate handoff quality                                                                                                                                                                                       | healthcare providers  | Nurse educators (evaluations of handoff recipients)                                                                                                | English**           | 10 items                                                                              | rating scale<br>9-point scale                                                                                                                                            | care coordination (i.e., handoff communication)               | care continuity / comprehensive care | combination (i.e., professional and organizational)       | different sample                      |
| 131. |                                                                        | Horwitz, L. I. <sup>103</sup>              | 2013 | USA      | To evaluate handoff quality                                                                                                                                                                                       | healthcare providers  | Nurse practitioners, medicine house staff and hospitalist attending; and third-party evaluator (evaluations of handoff providers)                  | English**           | not reported; comprised of 6 domains                                                  | rating scale<br>9-point scale                                                                                                                                            | care coordination (i.e., handoff communication)               | care continuity / comprehensive care | combination (i.e., professional and organizational)       | different sample                      |
| 132. |                                                                        | Horwitz, L. I. <sup>103</sup>              | 2013 | USA      | To evaluate handoff quality                                                                                                                                                                                       | healthcare providers  | Nurse practitioners, medicine house staff and hospitalist attending; and third-party evaluator (evaluations of handoff recipients)                 | English**           | not reported; comprised of 6 domains                                                  | rating scale<br>9-point scale                                                                                                                                            | care coordination (i.e., handoff communication)               | care continuity / comprehensive care | combination (i.e., professional and organizational)       | different sample                      |
|      | (62)                                                                   |                                            |      |          |                                                                                                                                                                                                                   |                       |                                                                                                                                                    |                     |                                                                                       |                                                                                                                                                                          |                                                               |                                      |                                                           |                                       |
| 133. | Handover Performance Tool (HPT)                                        | Pezzolesi, C. <sup>104</sup>               | 2013 | UK       | To help clinicians systematically assess the quality and safety of handovers (non-technical skills)                                                                                                               | healthcare providers  | doctors from multidisciplinary groups these doctors were tasked to rate the handover activities                                                    | English**           | 25 items on communication, teamwork, leadership, situation awareness, task management | rating scale                                                                                                                                                             | care integration                                              | care continuity / comprehensive care | professional integration                                  |                                       |
|      | (63)                                                                   |                                            |      |          |                                                                                                                                                                                                                   |                       |                                                                                                                                                    |                     |                                                                                       |                                                                                                                                                                          |                                                               |                                      |                                                           |                                       |
| 134. | Health Care Climate Questionnaire (HCCQ)                               | Fiscella <sup>105</sup>                    | 2007 | USA      | To measure physician autonomy support, a key dimension in patient-centered communication                                                                                                                          | patients              | real-life and standardized patients                                                                                                                | English             | 5 items                                                                               | rating scale: 5-point Likert scale (1 = strongly disagree and 5 = strongly agree) to rate physician behavior, with a score range of 5 (low support) to 25 (high support) | patient-centered care (i.e., physician-patient communication) | patient-centered care                | clinical integration                                      |                                       |
|      | (64)                                                                   |                                            |      |          |                                                                                                                                                                                                                   |                       |                                                                                                                                                    |                     |                                                                                       |                                                                                                                                                                          |                                                               |                                      |                                                           |                                       |
| 135. | Health Care Communication Questionnaire (HCCQ)                         | Gremigni, P. <sup>106</sup>                | 2008 | Italy    | To measure outpatients' experience with person-centered communication of non-medical hospital staff                                                                                                               | patients              | outpatients attending different services at the same hospital in the North of Italy, after having an encounter with a member of the hospital staff | Italian             | 13 items                                                                              | rating scale<br>5-point Likert scale, ranging from 1 (not at all) to 5 (very much)                                                                                       | patient-centered care                                         | patient-centered care                | clinical integration                                      |                                       |
|      | (65)                                                                   |                                            |      |          |                                                                                                                                                                                                                   |                       |                                                                                                                                                    |                     |                                                                                       |                                                                                                                                                                          |                                                               |                                      |                                                           |                                       |
| 136. | Health Care relationship (HCR) Trust Scale                             | Bova <sup>107</sup>                        | 2006 | USA      | To measure patient trust from the perspective of vulnerable health care consumers                                                                                                                                 | patients              | PWA                                                                                                                                                | English             | 15 items                                                                              | rating scale<br>0 to 4                                                                                                                                                   | other: trust                                                  | patient-centered care                | clinical integration                                      |                                       |

|      | Index Instrument<br>(209 index instruments;<br>379 validation studies) | Reference Study<br>(300 articles)       | Year | Country     | Purpose of instrument                                                                                                                                                                                                                                                                                                                                                                                                                              | Type of respondent     | Sample population                                                                                  | Language                      | Description of version, items, and subscales                                                                                                                                                                                                                                                                                                                                                                                             | Response options                                                                                      | Construct purported to measure                                                  | Construct classification             | Domain classification                                     | Remarks                       |
|------|------------------------------------------------------------------------|-----------------------------------------|------|-------------|----------------------------------------------------------------------------------------------------------------------------------------------------------------------------------------------------------------------------------------------------------------------------------------------------------------------------------------------------------------------------------------------------------------------------------------------------|------------------------|----------------------------------------------------------------------------------------------------|-------------------------------|------------------------------------------------------------------------------------------------------------------------------------------------------------------------------------------------------------------------------------------------------------------------------------------------------------------------------------------------------------------------------------------------------------------------------------------|-------------------------------------------------------------------------------------------------------|---------------------------------------------------------------------------------|--------------------------------------|-----------------------------------------------------------|-------------------------------|
|      | (66)                                                                   |                                         |      |             |                                                                                                                                                                                                                                                                                                                                                                                                                                                    |                        |                                                                                                    |                               |                                                                                                                                                                                                                                                                                                                                                                                                                                          |                                                                                                       |                                                                                 |                                      |                                                           |                               |
| 137. | Health Care System Distrust Scale                                      | Rose <sup>108</sup>                     | 2004 | USA         | To measure distrust within the healthcare system                                                                                                                                                                                                                                                                                                                                                                                                   | others: general public | members of the public who are waiting outside of court                                             | English**                     | 10 items                                                                                                                                                                                                                                                                                                                                                                                                                                 | rating scale                                                                                          | other: distrust                                                                 | patient-centered care                | clinical integration                                      |                               |
|      | (67)                                                                   |                                         |      |             |                                                                                                                                                                                                                                                                                                                                                                                                                                                    |                        |                                                                                                    |                               |                                                                                                                                                                                                                                                                                                                                                                                                                                          |                                                                                                       |                                                                                 |                                      |                                                           |                               |
| 138. | Heart Continuity of Care Questionnaire (HCCQ)                          | Hadjistavropoulos, H. D. <sup>109</sup> | 2004 | Canada      | To measure patient perceptions of continuity of care among patients with CHF and AF after hospital discharge                                                                                                                                                                                                                                                                                                                                       | patients               | cardiac patients                                                                                   | English                       | 41 items                                                                                                                                                                                                                                                                                                                                                                                                                                 | rating scale<br>5-point Likert scale response format anchored by strongly agree and strongly disagree | care continuity                                                                 | care continuity / comprehensive care | clinical integration                                      |                               |
| 139. |                                                                        | Kowalyk, K. M. <sup>110</sup>           | 2004 | Canada      | To assess continuity of care from patients perspective                                                                                                                                                                                                                                                                                                                                                                                             | patients               |                                                                                                    | English                       | 37 items                                                                                                                                                                                                                                                                                                                                                                                                                                 | rating scale                                                                                          | care continuity                                                                 | care continuity / comprehensive care | combination (i.e., clinical and professional integration) |                               |
|      | (68)                                                                   |                                         |      |             |                                                                                                                                                                                                                                                                                                                                                                                                                                                    |                        |                                                                                                    |                               |                                                                                                                                                                                                                                                                                                                                                                                                                                          |                                                                                                       |                                                                                 |                                      |                                                           |                               |
| 140. | Helping Alliance Questionnaire (HAQ)                                   | Bale <sup>111</sup>                     | 2006 | UK          | To assess the quality of the therapeutic alliance between patients with severe and long-term mental illness and their key-workers                                                                                                                                                                                                                                                                                                                  | patients               | patients who had been cared for by the team for more than three months                             | English                       | 5 items                                                                                                                                                                                                                                                                                                                                                                                                                                  | other combination of graphic scale (VAS) and categorical scales                                       | care coordination                                                               | patient-centered care                | professional integration                                  |                               |
| 141. |                                                                        | De Weert-Van Oene <sup>112</sup>        | 1999 | Netherlands | A patient self-report measure which assesses the extent to which the patient experiences the therapist and the therapy as helpful: type i-perceived helpfulness (i.e., the patient's experience of the therapist as providing or being capable of providing the help that is needed); type of collaboration or bonding (i.e., patient's experience of treatment as a process of working together with the therapist toward the goals of treatment) | patients               | substance-dependent patients of an addiction clinic                                                | Dutch                         | 11 items                                                                                                                                                                                                                                                                                                                                                                                                                                 | rating scale<br>4-point scale                                                                         | patient-centered care                                                           | patient-centered care                | clinical integration                                      |                               |
|      | (69)                                                                   |                                         |      |             |                                                                                                                                                                                                                                                                                                                                                                                                                                                    |                        |                                                                                                    |                               |                                                                                                                                                                                                                                                                                                                                                                                                                                          |                                                                                                       |                                                                                 |                                      |                                                           |                               |
| 142. | Hospital Survey of Patient Safety Culture (HSOPSC)                     | Nie, Y. <sup>113</sup>                  | 2013 | China       | To assess patient safety culture                                                                                                                                                                                                                                                                                                                                                                                                                   | healthcare providers   | physicians and nurses                                                                              | Chinese                       | 29 items                                                                                                                                                                                                                                                                                                                                                                                                                                 | rating scale                                                                                          | other: patient-safety culture                                                   | patient-centered care                | professional integration                                  |                               |
|      | (70)                                                                   |                                         |      |             |                                                                                                                                                                                                                                                                                                                                                                                                                                                    |                        |                                                                                                    |                               |                                                                                                                                                                                                                                                                                                                                                                                                                                          |                                                                                                       |                                                                                 |                                      |                                                           |                               |
| 143. | Human Service integration Measure                                      | Browne, G. <sup>114</sup>               | 2004 | Canada      | To quantify the extent, scope and depth of integration as perceived by local service providers; a quantitative integration measure for each service and a total integration measure of the level of service integration - pilot test                                                                                                                                                                                                               | healthcare providers   | agencies that participated included groups from health, social, education, and community resources | English                       | not item-based - identifies specific services in the left hand column that are participating in a program of care                                                                                                                                                                                                                                                                                                                        | rating scale<br>ordinal scale articulates a five-domain continuum of increasing integration (0-4)     | care integration (i.e., service integration)                                    | care integration                     | organizational integration                                |                               |
|      | (71)                                                                   |                                         |      |             |                                                                                                                                                                                                                                                                                                                                                                                                                                                    |                        |                                                                                                    |                               |                                                                                                                                                                                                                                                                                                                                                                                                                                          |                                                                                                       |                                                                                 |                                      |                                                           |                               |
| 144. | Hybrid tool from 3 questionnaires                                      | Burns, T. <sup>115</sup>                | 2009 | UK          | to operationalize flexible continuity, relational continuity and experienced continuity                                                                                                                                                                                                                                                                                                                                                            | patients               | service users                                                                                      | English                       | 32 components: Freeman's eight definitions of continuity were operationalized using a total of 32 components for consideration for entry into the factor analysis (including the 3 questionnaires)                                                                                                                                                                                                                                       | rating scale                                                                                          | care continuity                                                                 | care continuity / comprehensive care | clinical integration                                      |                               |
|      | (72)                                                                   |                                         |      |             |                                                                                                                                                                                                                                                                                                                                                                                                                                                    |                        |                                                                                                    |                               |                                                                                                                                                                                                                                                                                                                                                                                                                                          |                                                                                                       |                                                                                 |                                      |                                                           |                               |
| 145. | Index of GP integration (GP questionnaire)                             | Batterham, R. <sup>116</sup>            | 2002 | Australia   | To measure integration process factors and enabling factors in gp integration                                                                                                                                                                                                                                                                                                                                                                      | healthcare providers   | general practitioners                                                                              | English                       | 70 items; 50 integration process and 20 for enabling factors                                                                                                                                                                                                                                                                                                                                                                             | rating scale<br>5-point scales                                                                        | care integration (i.e., patient care integration and public health integration) | care integration                     | combination (i.e., clinical and system integration)       |                               |
|      | (73)                                                                   |                                         |      |             |                                                                                                                                                                                                                                                                                                                                                                                                                                                    |                        |                                                                                                    |                               |                                                                                                                                                                                                                                                                                                                                                                                                                                          |                                                                                                       |                                                                                 |                                      |                                                           |                               |
| 146. | Individualized Care Instrument (ICI)                                   | Charalambous, A. <sup>117</sup>         | 2012 | Finland     | Reflect a social and nursing long-term care context; devised for use in older people's care settings within a framework of social science, which may be more appropriate for older people in social settings                                                                                                                                                                                                                                       | healthcare providers   | nurses of older persons in the defined area in Finland                                             | Finnish (original in English) | 34 items; 2 dimensions/ scales each having 3 subscales; (ICS-A) explores the nurses' views about how they support patient individuality through nursing activities; (ICS-B) explores the nurses' views on the extent that patients' individuality is taken into account in the care delivered; 3 subscales: 1) the clinical situation (7 items), 2) the personal life situation (4 items), and 3) decisional control over care (6 items) | rating scale<br>4 or 5-point scale                                                                    | patient-centered care (i.e., individualized care)                               | patient-centered care                | clinical integration                                      |                               |
|      | (74)                                                                   |                                         |      |             |                                                                                                                                                                                                                                                                                                                                                                                                                                                    |                        |                                                                                                    |                               |                                                                                                                                                                                                                                                                                                                                                                                                                                          |                                                                                                       |                                                                                 |                                      |                                                           |                               |
| 147. | Individualized Care Inventory                                          | O'Rourke <sup>118</sup>                 | 2009 | Canada      | To assess the quality of care experience by patients                                                                                                                                                                                                                                                                                                                                                                                               | healthcare providers   |                                                                                                    | English                       | 34 items                                                                                                                                                                                                                                                                                                                                                                                                                                 | rating scale                                                                                          | other: patient autonomy, staff communication, staff-patient communication       | patient-centered care                | combination (i.e., clinical and professional integration) | different type of respondents |
| 148. |                                                                        | O'Rourke <sup>118</sup>                 | 2009 | Canada      | To assess the quality of care experience by patients                                                                                                                                                                                                                                                                                                                                                                                               | informal caregivers    |                                                                                                    | English                       | 34 items                                                                                                                                                                                                                                                                                                                                                                                                                                 | rating scale                                                                                          | other: patient autonomy, staff communication, staff-patient communication       | patient-centered care                | combination (i.e., clinical and professional integration) | different type of respondents |
|      | (75)                                                                   |                                         |      |             |                                                                                                                                                                                                                                                                                                                                                                                                                                                    |                        |                                                                                                    |                               |                                                                                                                                                                                                                                                                                                                                                                                                                                          |                                                                                                       |                                                                                 |                                      |                                                           |                               |

|      | Index Instrument<br>(209 index instruments;<br>379 validation studies) | Reference Study<br>(300 articles) | Year | Country | Purpose of instrument                                                                                                                                                                                 | Type of<br>respondent | Sample population                                                                                                                                                                     | Language                       | Description of version, items, and<br>subscales                                                                                                           | Response options                                                                                                      | Construct purported to measure                                                                                   | Construct classification            | Domain<br>classification                                  | Remarks                        |
|------|------------------------------------------------------------------------|-----------------------------------|------|---------|-------------------------------------------------------------------------------------------------------------------------------------------------------------------------------------------------------|-----------------------|---------------------------------------------------------------------------------------------------------------------------------------------------------------------------------------|--------------------------------|-----------------------------------------------------------------------------------------------------------------------------------------------------------|-----------------------------------------------------------------------------------------------------------------------|------------------------------------------------------------------------------------------------------------------|-------------------------------------|-----------------------------------------------------------|--------------------------------|
| 149. | Individualized Care Scale<br>(ICS)                                     | Charalambous, A. <sup>117</sup>   | 2012 | Finland | In its original form, the tool reflects an acute nursing context; originally devised for use in acute care within a framework of nursing science, which may be more appropriate for acute health care | healthcare providers  | nurses of older persons in the defined area in Finland                                                                                                                                | Finnish (developed in Finnish) | 46 items (4 domains/scales); knowing the person, patient/resident autonomy, staff-to-patient or -resident communication, and staff-to-staff communication | rating scale<br>5 point scale                                                                                         | patient-centered care (i.e., individualized care)                                                                | patient-centered care               | clinical integration                                      |                                |
| 150. |                                                                        | Petroz, U. <sup>119</sup>         | 2011 | Canada  | To assess the patient centered care received by patients                                                                                                                                              | patients              |                                                                                                                                                                                       | English                        | 38 items                                                                                                                                                  | rating scale                                                                                                          | patient-centered care                                                                                            | patient-centered care               | clinical integration                                      |                                |
| 151. |                                                                        | Suhonen, R. <sup>120</sup>        | 2010 | Finland | To explore nurses views on how nurses support patient individually through nursing activities and the extent to which nurses perceive the care they provide to patient is individualized              | healthcare providers  | nurses from university, regional, psychiatric hospitals and health centres) working in inpatient wards                                                                                | Finnish**                      | 34 items; 17 on each ICS-A and ICS-B) - clinical situation, personal life situation and decisional control over care                                      | rating scale                                                                                                          | patient-centered care                                                                                            | patient-centered care               | clinical integration                                      | different language and country |
| 152. |                                                                        | Suhonen, R. <sup>121</sup>        | 2000 | Finland | To measure patients' views on how individuality is supported through specific nursing interventions (ICA) and how they perceive individuality in their own care (ICB) during hospitalization.         | patients              | adult patients discharged from one Finnish general hospital between June 26 and September 30 1996                                                                                     | Finnish**                      | 43 items                                                                                                                                                  | rating scale                                                                                                          | patient-centered care                                                                                            | patient-centered care               | clinical integration                                      |                                |
| 153. |                                                                        | Suhonen <sup>122</sup>            | 2010 | Finland | To assess individualized nursing care                                                                                                                                                                 | patients              |                                                                                                                                                                                       | Finnish                        | 34 items                                                                                                                                                  | rating scale                                                                                                          | patient-centered care                                                                                            | patient-centered care               | clinical integration                                      | different language and country |
| 154. |                                                                        | Suhonen <sup>122</sup>            | 2010 | Greece  | To assess individualized nursing care                                                                                                                                                                 | patients              |                                                                                                                                                                                       | Greek                          | 34 items                                                                                                                                                  | rating scale                                                                                                          | patient-centered care                                                                                            | patient-centered care               | clinical integration                                      | different language and country |
| 155. |                                                                        | Suhonen <sup>122</sup>            | 2010 | Sweden  | To assess individualized nursing care                                                                                                                                                                 | patients              |                                                                                                                                                                                       | Swedish                        | 34 items                                                                                                                                                  | rating scale                                                                                                          | patient-centered care                                                                                            | patient-centered care               | clinical integration                                      | different language and country |
| 156. |                                                                        | Suhonen <sup>122</sup>            | 2010 | UK      | To assess individualized nursing care                                                                                                                                                                 | patients              |                                                                                                                                                                                       | English                        | 34 items                                                                                                                                                  | rating scale                                                                                                          | patient-centered care                                                                                            | patient-centered care               | clinical integration                                      | different language and country |
| 157. |                                                                        | Suhonen <sup>122</sup>            | 2010 | USA     | To assess individualized nursing care                                                                                                                                                                 | patients              |                                                                                                                                                                                       | English                        | 34 items                                                                                                                                                  | rating scale                                                                                                          | patient-centered care                                                                                            | patient-centered care               | clinical integration                                      | different language and country |
|      | (76)                                                                   |                                   |      |         |                                                                                                                                                                                                       |                       |                                                                                                                                                                                       |                                |                                                                                                                                                           |                                                                                                                       |                                                                                                                  |                                     |                                                           |                                |
| 158. | Inpatient-Treatment Alliance Scale (ITAS)                              | Blais <sup>123</sup>              | 2004 | USA     | To measure the patient's composite treatment alliance as it developed across the entire inpatient treatment experience                                                                                | patients              | inpatients in a mental psychiatric patients                                                                                                                                           | English                        | 10 items                                                                                                                                                  | rating scale ranged from 0 to 6                                                                                       | patient-centered care (i.e., treatment alliance in patient-centered care)                                        | patient-centered care               | clinical integration                                      |                                |
|      | (77)                                                                   |                                   |      |         |                                                                                                                                                                                                       |                       |                                                                                                                                                                                       |                                |                                                                                                                                                           |                                                                                                                       |                                                                                                                  |                                     |                                                           |                                |
| 159. | Internal Participation Scale (IPS)                                     | Korner, M. <sup>124</sup>         | 2013 | Germany | To assess internal participants from patients' perspective                                                                                                                                            | patients              |                                                                                                                                                                                       | German                         | 6 items                                                                                                                                                   | rating scale                                                                                                          | other: internal participation                                                                                    | patient-centered care               | combination (i.e., clinical and professional integration) | different type of respondent   |
| 160. |                                                                        | Korner, M. <sup>124</sup>         | 2013 | Germany | To assess internal participants from patients' perspective                                                                                                                                            | healthcare providers  |                                                                                                                                                                                       | German                         | 6 items                                                                                                                                                   | rating scale                                                                                                          | other: internal participation                                                                                    | patient-centered care               | combination (i.e., clinical and professional integration) | different type of respondent   |
|      | (78)                                                                   |                                   |      |         |                                                                                                                                                                                                       |                       |                                                                                                                                                                                       |                                |                                                                                                                                                           |                                                                                                                       |                                                                                                                  |                                     |                                                           |                                |
| 161. | Interpersonal Processes of Care version (IPC-II)                       | Beaulieu, M. D. <sup>39</sup>     | 2011 | Canada  | To measure 4 subscales: elicited concerns, explained results, patient-centered decision making, hurried communication                                                                                 | patients              | healthcare users balanced by English/ French language, rural/urban location, low/high level of education and poor/average/excellent overall PHC experience                            | French/ English                | 16 items (4 subscales); (3-4-4-5)                                                                                                                         | rating scale<br>Likert frequency, 1=never, 5=always                                                                   | patient-centered care (i.e., interpersonal process of care provision)                                            | patient-centered care               | clinical integration                                      |                                |
| 162. |                                                                        | Haggerty <sup>43</sup>            | 2011 | Canada  | Mapped attributes: interpersonal communication, respectfulness                                                                                                                                        | patients              |                                                                                                                                                                                       | French/ English                | Item distribution: interpersonal communication (10), respectfulness (22)                                                                                  | rating scale<br>1 to 5 scale                                                                                          | patient-centered care                                                                                            | care integration                    | functional integration                                    |                                |
|      | (79)                                                                   |                                   |      |         |                                                                                                                                                                                                       |                       |                                                                                                                                                                                       |                                |                                                                                                                                                           |                                                                                                                       |                                                                                                                  |                                     |                                                           |                                |
| 163. | Jefferson Scale of Physician Empathy                                   | Hojat <sup>125</sup>              | 2001 | USA     | Research instrument for measuring physicians' empathy                                                                                                                                                 | healthcare providers  | physicians, residents and 3rd year medical students                                                                                                                                   | English                        | 90 items original; 45 items final                                                                                                                         | rating scale<br>7-point scale                                                                                         | patient-centered care (i.e., physician empathy)                                                                  | patient-centered care               | clinical integration                                      |                                |
|      | (80)                                                                   |                                   |      |         |                                                                                                                                                                                                       |                       |                                                                                                                                                                                       |                                |                                                                                                                                                           |                                                                                                                       |                                                                                                                  |                                     |                                                           |                                |
| 164. | Jones Synergy Scale                                                    | Jones, J. <sup>126</sup>          | 2011 | Ireland | A five-point eight-item synergy measurement tool                                                                                                                                                      | healthcare providers  | Participants included partners from the following sectors: hospitals, community health services, health service managers, education, youth sector, sports, arts and voluntary groups. | English                        | 8 items                                                                                                                                                   | rating scale<br>Five-point Likert scales were used, where 5 is 'always' and 1 is 'never', with a 'don't know' option. | other: synergy                                                                                                   | care coordination / case management | organizational integration                                |                                |
|      | (81)                                                                   |                                   |      |         |                                                                                                                                                                                                       |                       |                                                                                                                                                                                       |                                |                                                                                                                                                           |                                                                                                                       |                                                                                                                  |                                     |                                                           |                                |
| 165. | Kim Alliance Scale                                                     | Kim <sup>127</sup>                | 2001 | USA     | To measure the quality of the therapeutic alliance from the patient's perspective, also patient empowerment                                                                                           | patients              | registered nurses were recruited but considered as patients                                                                                                                           | English                        | 48 items                                                                                                                                                  | rating scale<br>4-point Likert-type scale ranging from 1 (never) to 4 (always)                                        | care integration (i.e., therapeutic alliance dimensions: collaboration, communication, integration, empowerment) | care integration                    | clinical integration                                      |                                |
|      | (82)                                                                   |                                   |      |         |                                                                                                                                                                                                       |                       |                                                                                                                                                                                       |                                |                                                                                                                                                           |                                                                                                                       |                                                                                                                  |                                     |                                                           |                                |



|      | Index Instrument<br>(209 index instruments;<br>379 validation studies) | Reference Study<br>(300 articles) | Year | Country      | Purpose of instrument                                                                                                                                                                                                                                                                                                                                                                                                                                               | Type of respondent               | Sample population                                                                                                                                                                    | Language                     | Description of version, items, and subscales                                                                                                                                                                                                                                                                                                                                                                                                                                                                                                                                                                       | Response options                                                                                                                                                                                | Construct purported to measure                             | Construct classification             | Domain classification | Remarks                                    |
|------|------------------------------------------------------------------------|-----------------------------------|------|--------------|---------------------------------------------------------------------------------------------------------------------------------------------------------------------------------------------------------------------------------------------------------------------------------------------------------------------------------------------------------------------------------------------------------------------------------------------------------------------|----------------------------------|--------------------------------------------------------------------------------------------------------------------------------------------------------------------------------------|------------------------------|--------------------------------------------------------------------------------------------------------------------------------------------------------------------------------------------------------------------------------------------------------------------------------------------------------------------------------------------------------------------------------------------------------------------------------------------------------------------------------------------------------------------------------------------------------------------------------------------------------------------|-------------------------------------------------------------------------------------------------------------------------------------------------------------------------------------------------|------------------------------------------------------------|--------------------------------------|-----------------------|--------------------------------------------|
| 166. | Learners' Perceptions Survey—Primary Care (LPS-PC)                     | Byrne, J. M. <sup>128</sup>       | 2013 | USA          | To measure residents' perceptions about their primary and patient-centered care experiences                                                                                                                                                                                                                                                                                                                                                                         | healthcare providers             | internal medicine residents assigned to continuity clinics                                                                                                                           | English                      | original validated survey has 57 items and was modified to include facility-level training experience domain that asked respondents to rate the value of their pc clinical experience (poor, fair, adequate, very good, excellent); included an 18-element patient-centered care domain; and changed several questions to focus on attributes of the pc setting, including faculty and preceptors, the learning, clinical work, and physical environment, and learners' personal experiences domains; final number of items were unclear - counting items (elements in the reported tables) n was found to be = 95 | rating scale<br>Element responses were scored by assigning integer values to the 5 response categories (1= very dissatisfied, 2 = dissatisfied, 3 = neither, 4 = satisfied, 5 = very satisfied) | patient-centered care                                      | patient-centered care                | clinical integration  |                                            |
|      | (83)                                                                   |                                   |      |              |                                                                                                                                                                                                                                                                                                                                                                                                                                                                     |                                  |                                                                                                                                                                                      |                              |                                                                                                                                                                                                                                                                                                                                                                                                                                                                                                                                                                                                                    |                                                                                                                                                                                                 |                                                            |                                      |                       |                                            |
| 167. | Matched-pair instrument                                                | Campbell <sup>129</sup>           | 2007 | Canada       | To capture the perception of doctors and patients on communication that occurred in a single office visit                                                                                                                                                                                                                                                                                                                                                           | informal caregivers              |                                                                                                                                                                                      | English                      | 19 items                                                                                                                                                                                                                                                                                                                                                                                                                                                                                                                                                                                                           | rating scale<br>5-point scale                                                                                                                                                                   | patient-centered care (i.e., doctor-patient communication) | patient-centered care                | clinical integration  |                                            |
|      | (84)                                                                   |                                   |      |              |                                                                                                                                                                                                                                                                                                                                                                                                                                                                     |                                  |                                                                                                                                                                                      |                              |                                                                                                                                                                                                                                                                                                                                                                                                                                                                                                                                                                                                                    |                                                                                                                                                                                                 |                                                            |                                      |                       |                                            |
| 168. | Measure of Experienced Continuity of Care (MECC)                       | King, M. <sup>130</sup>           | 2008 | UK           | To measure patients' experience of care continuity                                                                                                                                                                                                                                                                                                                                                                                                                  | patients                         |                                                                                                                                                                                      | English**                    | 18 items                                                                                                                                                                                                                                                                                                                                                                                                                                                                                                                                                                                                           | rating scale                                                                                                                                                                                    | care continuity                                            | care continuity / comprehensive care | clinical integration  |                                            |
|      | (85)                                                                   |                                   |      |              |                                                                                                                                                                                                                                                                                                                                                                                                                                                                     |                                  |                                                                                                                                                                                      |                              |                                                                                                                                                                                                                                                                                                                                                                                                                                                                                                                                                                                                                    |                                                                                                                                                                                                 |                                                            |                                      |                       |                                            |
| 169. | Measure of Patient-Centered Communication (MPCC)                       | Clayton, M. F. <sup>88</sup>      | 2011 | USA          | To capture three dimensions of patient-centered communication: (a) exploration of illness and symptoms, including medical information and provider attempts to understand the patients' illness experience, (b) exploration of the whole person, by exploring contextual facets of the patients' family, work, and culture, and (c) achieving a mutual definition of the problem by establishing goals of treatment and identifying the patient and provider roles. | Others: student coders           | student coders conducting the verbal coding; sample of patient-provider videotapes                                                                                                   | English                      | Not reported; the MPCC describes interactions using a Yes/No format indicating the presence or absence of provider behaviors, such as validating patient concerns that indicate a patient-centered approach                                                                                                                                                                                                                                                                                                                                                                                                        | dichotomous scale<br>Yes/No                                                                                                                                                                     | patient-centered care                                      | patient-centered care                | clinical integration  |                                            |
|      | (86)                                                                   |                                   |      |              |                                                                                                                                                                                                                                                                                                                                                                                                                                                                     |                                  |                                                                                                                                                                                      |                              |                                                                                                                                                                                                                                                                                                                                                                                                                                                                                                                                                                                                                    |                                                                                                                                                                                                 |                                                            |                                      |                       |                                            |
| 170. | Measure of Processes of Care (MPOC)                                    | Bjerre, I. M. <sup>131</sup>      | 2004 | Sweden       | To measure the parent's perception of the habilitation process in Sweden; for evaluation of the processes of habilitation in Sweden on the five scales: (1) enabling and partnership; (2) providing general information; (3) providing specific information about the child; (4) coordinated and comprehensive care; and (5) respectful and supportive care                                                                                                         | patients and informal caregivers | parents (to distinguish from other informal caregivers) parents in families with disabled children receiving habilitation in one of four habilitation centers                        | Swedish                      | 56 questions with five scales                                                                                                                                                                                                                                                                                                                                                                                                                                                                                                                                                                                      | rating scale<br>7- point scale, from 'to a great extent' (7) to 'never' (1), with an additional alternative of 'not applicable' (0)                                                             | patient-centered care                                      | care integration                     | clinical integration  |                                            |
| 171. |                                                                        | Himuro, N. <sup>132</sup>         | 2013 | Japan        | To assess parents' self-reported experiences of family-centered behaviors of rehabilitation services providers                                                                                                                                                                                                                                                                                                                                                      | informal caregivers              | caregivers of children with various diagnoses was recruited through seven children's rehabilitation centers in Hokkaido                                                              | Japanese                     | 56 items                                                                                                                                                                                                                                                                                                                                                                                                                                                                                                                                                                                                           | rating scale<br>Response options range from one (Not at all) to seven (To a very great extent). A 'Not applicable' category is also included.                                                   | patient-centered care (i.e., family-centeredness)          | care integration                     | clinical integration  | different number of items (item reduction) |
| 172. |                                                                        | Himuro, N. <sup>132</sup>         | 2013 | Japan        | To assess parents' self-reported experiences of family-centered behaviors of rehabilitation services providers                                                                                                                                                                                                                                                                                                                                                      | informal caregivers              | caregivers of children with various diagnoses was recruited through seven children's rehabilitation centres in Hokkaido                                                              | Japanese                     | 20 items                                                                                                                                                                                                                                                                                                                                                                                                                                                                                                                                                                                                           | rating scale<br>Response options range from one (Not at all) to seven (To a very great extent). A 'Not applicable' category is also included.                                                   | patient-centered care (i.e., family-centeredness)          | care integration                     | clinical integration  | different number of items (item reduction) |
| 173. |                                                                        | Klassen, A. F. <sup>133</sup>     | 2009 | Canada       | To measure parental perception of the extent to which specific behaviors of healthcare professionals occur                                                                                                                                                                                                                                                                                                                                                          | informal caregivers              |                                                                                                                                                                                      | English**                    | 20 items                                                                                                                                                                                                                                                                                                                                                                                                                                                                                                                                                                                                           | rating scale                                                                                                                                                                                    | patient-centered care                                      | care integration                     | clinical integration  | different study                            |
| 174. |                                                                        | Saloojee, G. M. <sup>134</sup>    | 2009 | South Africa | To assess the level of processes in care delivery                                                                                                                                                                                                                                                                                                                                                                                                                   | informal caregivers              | caregivers of children aged 1-18 with cerebral palsy living in poorly resourced peri-urban, urban and/or rural areas who received rehabilitation therapy services at public hospital | local South African language | 22 items                                                                                                                                                                                                                                                                                                                                                                                                                                                                                                                                                                                                           | rating scale                                                                                                                                                                                    | patient-centered care                                      | care integration                     | clinical integration  | different study                            |
| 175. |                                                                        | Tang, H. N. <sup>135</sup>        | 2012 | Singapore    | To measure the extent to which service providers perceived that FCSS were implemented in the program                                                                                                                                                                                                                                                                                                                                                                | healthcare providers             | teachers, therapists, psychologist and social workers                                                                                                                                | English**                    | 27 items; interpersonal sensitivity (SIS), providing general information (PGI), communicating specific information (CSI) and treating people respectfully (TPR)                                                                                                                                                                                                                                                                                                                                                                                                                                                    | rating scale                                                                                                                                                                                    | patient-centered care                                      | care integration                     | clinical integration  | different study                            |
| 176. |                                                                        | King <sup>136</sup>               | 2004 | Canada       | To measure of parents' perceptions of the extent to which specific behaviors of                                                                                                                                                                                                                                                                                                                                                                                     | informal caregivers              | parents of children with chronic health conditions                                                                                                                                   | English                      | 20 items                                                                                                                                                                                                                                                                                                                                                                                                                                                                                                                                                                                                           | rating scale<br>A random selection of 25% of the sample completed                                                                                                                               | care continuity (i.e., comprehensive care)                 | care integration                     | clinical integration  | different study and number of items        |

|      | Index Instrument<br>(209 index instruments;<br>379 validation studies) | Reference Study<br>(300 articles) | Year | Country     | Purpose of instrument                                                                                                                                       | Type of<br>respondent             | Sample population                                                                               | Language | Description of version, items, and<br>subscales                                                                                                                                                                                                                                                                                                                                                                                                | Response options                                                                                                                                                                                                                                                                                                            | Construct purported to measure                                                                                                                                                          | Construct classification | Domain<br>classification   | Remarks                             |
|------|------------------------------------------------------------------------|-----------------------------------|------|-------------|-------------------------------------------------------------------------------------------------------------------------------------------------------------|-----------------------------------|-------------------------------------------------------------------------------------------------|----------|------------------------------------------------------------------------------------------------------------------------------------------------------------------------------------------------------------------------------------------------------------------------------------------------------------------------------------------------------------------------------------------------------------------------------------------------|-----------------------------------------------------------------------------------------------------------------------------------------------------------------------------------------------------------------------------------------------------------------------------------------------------------------------------|-----------------------------------------------------------------------------------------------------------------------------------------------------------------------------------------|--------------------------|----------------------------|-------------------------------------|
|      |                                                                        |                                   |      |             | health care professionals occur                                                                                                                             |                                   |                                                                                                 |          |                                                                                                                                                                                                                                                                                                                                                                                                                                                | MPOC-20 using the original response scaling (i.e., with only the endpoints and midpoint having a descriptive phrase). The remaining 75% of the sample received the revised MPOC-20 with the new response options. Each of the seven response options were labeled rather than just the two extreme points and the midpoint. |                                                                                                                                                                                         |                          |                            |                                     |
| 177. |                                                                        | King <sup>137</sup>               | 1996 | Canada      | To assess parents' experiences and perceptions of specific behaviors of healthcare professionals                                                            | informal caregivers               |                                                                                                 | English  | 59 items                                                                                                                                                                                                                                                                                                                                                                                                                                       | rating scale                                                                                                                                                                                                                                                                                                                | patient-centered care                                                                                                                                                                   | care integration         | clinical integration       | different study and number of items |
| 178. |                                                                        | McConachie <sup>138</sup>         | 2003 | UK          | To reflect parents' perceptions of the quality of services received.                                                                                        | informal caregivers               |                                                                                                 | English  | 55 items                                                                                                                                                                                                                                                                                                                                                                                                                                       | rating scale                                                                                                                                                                                                                                                                                                                | patient-centered care                                                                                                                                                                   | care integration         | clinical integration       |                                     |
| 179. |                                                                        | McConachie <sup>138</sup>         | 2003 | UK          | To reflect parents' perceptions of the quality of services received.                                                                                        | informal caregivers               |                                                                                                 | English  | 55 items                                                                                                                                                                                                                                                                                                                                                                                                                                       | rating scale                                                                                                                                                                                                                                                                                                                | patient-centered care                                                                                                                                                                   | care integration         | clinical integration       | different samples in the same study |
| 180. |                                                                        | McConachie <sup>138</sup>         | 2003 | UK          | To reflect parents' perceptions of the quality of services received.                                                                                        | informal caregivers               |                                                                                                 | English  | 55 items                                                                                                                                                                                                                                                                                                                                                                                                                                       | rating scale                                                                                                                                                                                                                                                                                                                | patient-centered care                                                                                                                                                                   | care integration         | clinical integration       | different samples in the same study |
| 181. |                                                                        | McConachie <sup>138</sup>         | 2003 | UK          | To reflect parents' perceptions of the quality of services received.                                                                                        | informal caregivers               |                                                                                                 | English  | 55 items                                                                                                                                                                                                                                                                                                                                                                                                                                       | rating scale                                                                                                                                                                                                                                                                                                                | patient-centered care                                                                                                                                                                   | care integration         | clinical integration       | different samples in the same study |
| 182. |                                                                        | McConachie <sup>138</sup>         | 2003 | UK          | To reflect parents' perceptions of the quality of services received.                                                                                        | informal caregivers               |                                                                                                 | English  | 55 items                                                                                                                                                                                                                                                                                                                                                                                                                                       | rating scale                                                                                                                                                                                                                                                                                                                | patient-centered care                                                                                                                                                                   | care integration         | clinical integration       | different samples in the same study |
| 183. |                                                                        | Siebes <sup>139</sup>             | 2007 | Netherlands | To assess the quality of care processes                                                                                                                     | informal caregivers               |                                                                                                 | Dutch    | 20 items                                                                                                                                                                                                                                                                                                                                                                                                                                       | rating scale                                                                                                                                                                                                                                                                                                                | patient-centered care                                                                                                                                                                   | care integration         | clinical integration       | different study and number of items |
| 184. |                                                                        | Woodside <sup>140</sup>           | 2001 | Canada      | To measure the family-centered behaviors of health professionals working with children with chronic health or development problems                          | healthcare providers              | health professionals working with children with chronic health problems                         | English  | 38 items                                                                                                                                                                                                                                                                                                                                                                                                                                       | rating scale indicated that family-centered behaviors were displayed to a very great extent; 6 bore the response option to a great extent; 5, to a fairly great extent; 4, to a moderate extent; 3, to a small extent; 2, to a very small extent; 1, not at all; and 0 indicated that the item Was not applicable           | patient-centered care (i.e., family-centeredness)                                                                                                                                       | patient-centered care    | clinical integration       | different study and number of items |
|      | (87)                                                                   |                                   |      |             |                                                                                                                                                             |                                   |                                                                                                 |          |                                                                                                                                                                                                                                                                                                                                                                                                                                                |                                                                                                                                                                                                                                                                                                                             |                                                                                                                                                                                         |                          |                            |                                     |
| 185. | Measure of Trust in Insurers                                           | Goold <sup>141</sup>              | 2006 | USA         | A comprehensive measure of insurer trust that is well grounded in the theoretical and empirical literature on trust in organizations and healthcare context | patients                          | respondents older than 18 with any type of health insurance, including Medicare and/or Medicaid | English  | 117 items (includes insurer trust, satisfaction with care, and doctor trust scales)                                                                                                                                                                                                                                                                                                                                                            | rating scale<br>5-point Likert scale                                                                                                                                                                                                                                                                                        | other: trust, satisfaction with care                                                                                                                                                    | patient-centered care    | clinical integration       |                                     |
|      | (88)                                                                   |                                   |      |             |                                                                                                                                                             |                                   |                                                                                                 |          |                                                                                                                                                                                                                                                                                                                                                                                                                                                |                                                                                                                                                                                                                                                                                                                             |                                                                                                                                                                                         |                          |                            |                                     |
| 186. | Measuring instrument for individualized care                           | Chappell <sup>142</sup>           | 2007 | Canada      | To assess individualized care                                                                                                                               | healthcare providers              | care aides                                                                                      | English  | 47 items (3 domains of individualized care: knowing the person/resident; resident autonomy and choice; and communication [staff-to-staff and staff-to-resident])                                                                                                                                                                                                                                                                               | rating scale<br>4/5-point Likert scale                                                                                                                                                                                                                                                                                      | patient-centered care (i.e., individualized care)                                                                                                                                       | patient-centered care    | clinical integration       |                                     |
|      | (89)                                                                   |                                   |      |             |                                                                                                                                                             |                                   |                                                                                                 |          |                                                                                                                                                                                                                                                                                                                                                                                                                                                |                                                                                                                                                                                                                                                                                                                             |                                                                                                                                                                                         |                          |                            |                                     |
| 187. | Medical Care Questionnaire (MCQ)                                       | Harley, C. <sup>143</sup>         | 2009 | UK          | To measure oncology patients' perceptions of the continuity and coordination of their medical care and communication with their doctors                     | patients                          | cancer patients                                                                                 | English  | 15 items (from a preliminary 21-item pool)                                                                                                                                                                                                                                                                                                                                                                                                     | rating scale<br>5-point Likert scale<br>response format anchored by strongly agree and strongly disagree                                                                                                                                                                                                                    | multiple constructs: coordination subscale reflects care continuity experience; 2 other subscales measure communication and preferences, which may be relevant to patient-centered care | care integration         | clinical integration       |                                     |
|      | (90)                                                                   |                                   |      |             |                                                                                                                                                             |                                   |                                                                                                 |          |                                                                                                                                                                                                                                                                                                                                                                                                                                                |                                                                                                                                                                                                                                                                                                                             |                                                                                                                                                                                         |                          |                            |                                     |
| 188. | Medical Communication Competence Scale                                 | Cegala <sup>144</sup>             | 1998 | USA         | To measure perceptions of self- and other-communication during medical consultations                                                                        | patients and healthcare providers |                                                                                                 | English  | physician and patient versions; Stage 1 = 56 items, physician version consisted of 33 self-competence items and 23 other-competence (i.e., patient-competence) Stage 2 = 25 self-competence items and 13 other-competence items (38 items for physician); 16 self-competence and 25 other-competence items (41 items for patients); Except for the 3 additional items on the patient MCCS, the items comprising the two versions were parallel | rating scale<br>5-point scale                                                                                                                                                                                                                                                                                               | patient-centered care                                                                                                                                                                   | patient-centered care    | clinical integration       |                                     |
|      | (91)                                                                   |                                   |      |             |                                                                                                                                                             |                                   |                                                                                                 |          |                                                                                                                                                                                                                                                                                                                                                                                                                                                |                                                                                                                                                                                                                                                                                                                             |                                                                                                                                                                                         |                          |                            |                                     |
| 189. | Medical Home Index (MHI)                                               | Cooley, W. C. <sup>145</sup>      | 2003 | USA         | To assess their implementation of the medical home concept                                                                                                  | healthcare providers              | pediatric primary care offices                                                                  | English  | 25 themes                                                                                                                                                                                                                                                                                                                                                                                                                                      | other<br>index score: Each domain                                                                                                                                                                                                                                                                                           | care coordination (i.e., organizational capacity, chronic condition management, care coordination,                                                                                      | care integration         | organizational integration |                                     |

|      | Index Instrument<br>(209 index instruments;<br>379 validation studies) | Reference Study<br>(300 articles) | Year | Country               | Purpose of instrument                                                                                                                                                                                                                                                    | Type of<br>respondent            | Sample population                                                                                                      | Language                                              | Description of version, items, and<br>subscales                                                                                                                                                 | Response options                                                                                                                                                                                                                                                                                                       | Construct purported to measure                                                                                      | Construct classification                | Domain<br>classification                                        | Remarks                                             |
|------|------------------------------------------------------------------------|-----------------------------------|------|-----------------------|--------------------------------------------------------------------------------------------------------------------------------------------------------------------------------------------------------------------------------------------------------------------------|----------------------------------|------------------------------------------------------------------------------------------------------------------------|-------------------------------------------------------|-------------------------------------------------------------------------------------------------------------------------------------------------------------------------------------------------|------------------------------------------------------------------------------------------------------------------------------------------------------------------------------------------------------------------------------------------------------------------------------------------------------------------------|---------------------------------------------------------------------------------------------------------------------|-----------------------------------------|-----------------------------------------------------------------|-----------------------------------------------------|
|      |                                                                        |                                   |      |                       |                                                                                                                                                                                                                                                                          |                                  |                                                                                                                        |                                                       |                                                                                                                                                                                                 | has anywhere from 2 -7<br>themes, these themes are<br>represented with<br>progressively<br>comprehensive care<br>processes and are expressed<br>as a continuum from Level<br>1 through Level 4                                                                                                                         | community outreach, data management, and<br>quality improvement)                                                    |                                         |                                                                 |                                                     |
|      | (92)                                                                   |                                   |      |                       |                                                                                                                                                                                                                                                                          |                                  |                                                                                                                        |                                                       |                                                                                                                                                                                                 |                                                                                                                                                                                                                                                                                                                        |                                                                                                                     |                                         |                                                                 |                                                     |
| 190. | Mental Health Statistics<br>Improvement Program<br>(MHSIP)             | Eisen <sup>52</sup>               | 2001 | USA                   | To assess quality of mental<br>health treatment provided<br>within statewide public mental<br>health systems                                                                                                                                                             | patients                         | adults enrolled in a behavioral<br>health plan                                                                         | English                                               | 40 items                                                                                                                                                                                        | rating scale<br>a 5-point "strongly agree to<br>strongly disagree" rating<br>scale with "I am neutral" as<br>the midpoint of the scale                                                                                                                                                                                 | patient satisfaction (i.e., access,<br>quality/appropriateness of care, outcome, and<br>general satisfaction)       | care integration                        | clinical integration                                            |                                                     |
|      | (93)                                                                   |                                   |      |                       |                                                                                                                                                                                                                                                                          |                                  |                                                                                                                        |                                                       |                                                                                                                                                                                                 |                                                                                                                                                                                                                                                                                                                        |                                                                                                                     |                                         |                                                                 |                                                     |
| 191. | Multi-country Survey<br>Study Responsiveness<br>Questionnaire          | Valentine, N. B. <sup>146</sup>   | 2007 | Multiple<br>Countries | To assess the non-clinical and<br>non-financial aspects of quality<br>of healthcare                                                                                                                                                                                      | patients                         | inpatients and outpatients<br>from hospitals in 41 countries                                                           | Multiple<br>based on<br>country where<br>administered | 33 (performance (judgments of<br>experiences), importance questions and<br>expectations)                                                                                                        | rating scale<br>polytomous                                                                                                                                                                                                                                                                                             | patient-centered care                                                                                               | patient-centered care                   | clinical integration                                            |                                                     |
|      | (94)                                                                   |                                   |      |                       |                                                                                                                                                                                                                                                                          |                                  |                                                                                                                        |                                                       |                                                                                                                                                                                                 |                                                                                                                                                                                                                                                                                                                        |                                                                                                                     |                                         |                                                                 |                                                     |
| 192. | Multidimensional Trust in<br>Health Care Systems Scale<br>(MTHCSS)     | Egede, L. E. <sup>147</sup>       | 2008 | USA                   | To examine the multiple<br>objects of trust in the health<br>care system                                                                                                                                                                                                 | patients                         | patients (final sample)<br>attending a primary care clinic<br>at an academic medical center                            | English                                               | 17-item scale: 10 items measuring trust in<br>health care providers, 4 items measuring<br>trust in health care payers, and 3 items<br>measuring trust in health care institutions               | rating scale<br>5-point Likert scale with<br>scores ranging from 5<br>(strongly agree) to 1<br>(strongly disagree)                                                                                                                                                                                                     | other: trust in healthcare system                                                                                   | patient-centered care                   | combination (i.e.,<br>organizational and<br>system integration) |                                                     |
|      | (95)                                                                   |                                   |      |                       |                                                                                                                                                                                                                                                                          |                                  |                                                                                                                        |                                                       |                                                                                                                                                                                                 |                                                                                                                                                                                                                                                                                                                        |                                                                                                                     |                                         |                                                                 |                                                     |
| 193. | National health and health<br>services use questionnaire               | Bentler, S. E. <sup>148</sup>     | 2014 | USA                   | To identify factors affecting<br>enrollment in Medicare<br>managed care plans; collected<br>self-reported data on usual<br>primary provider and place of<br>care, as well as data on the<br>quality and duration of the<br>patients' relationship with their<br>provider | patients                         | community-residing Medicare<br>beneficiaries 65 years old or<br>older                                                  | English                                               | only considered items used in the CFA<br>models (13 items)                                                                                                                                      | rating scale                                                                                                                                                                                                                                                                                                           | care continuity                                                                                                     | care continuity /<br>comprehensive care | clinical integration                                            |                                                     |
|      | (96)                                                                   |                                   |      |                       |                                                                                                                                                                                                                                                                          |                                  |                                                                                                                        |                                                       |                                                                                                                                                                                                 |                                                                                                                                                                                                                                                                                                                        |                                                                                                                     |                                         |                                                                 |                                                     |
| 194. | Nijmegen Continuity<br>Questionnaire (NCQ)                             | Uijen, A. A. <sup>149</sup>       | 2011 | Netherlands           | To measure continuity of care<br>from the patient's perspective<br>as a multidimensional concept<br>and across multiple care<br>settings                                                                                                                                 | patients                         | patients with one or more<br>chronic conditions                                                                        | Dutch                                                 | 16 items about the patient provider<br>relationship to be answered for five<br>different care providers and 14 items each<br>on the collaboration between four groups<br>of care providers      | rating scale                                                                                                                                                                                                                                                                                                           | care continuity                                                                                                     | care continuity /<br>comprehensive care | clinical integration                                            | different study<br>and number of<br>items           |
| 195. |                                                                        | Uijen, A. A. <sup>150</sup>       | 2012 | Netherlands           | To measure patients'<br>perceptions of personal, team,<br>and cross boundary continuity,<br>regardless of morbidity and<br>care setting, was developed                                                                                                                   | patients                         | patients with chronic<br>conditions                                                                                    | Dutch                                                 | 28 items                                                                                                                                                                                        | rating scale                                                                                                                                                                                                                                                                                                           | care continuity                                                                                                     | care continuity /<br>comprehensive care | clinical integration                                            | different study<br>and number of<br>items           |
|      | (97)                                                                   |                                   |      |                       |                                                                                                                                                                                                                                                                          |                                  |                                                                                                                        |                                                       |                                                                                                                                                                                                 |                                                                                                                                                                                                                                                                                                                        |                                                                                                                     |                                         |                                                                 |                                                     |
| 196. | Nursing Practice Models<br>Questionnaire                               | Mueller, C. <sup>151</sup>        | 2010 | USA                   | To evaluate the nursing<br>practice model in long term<br>care facilities                                                                                                                                                                                                | healthcare<br>providers          |                                                                                                                        | English**                                             | 37 items                                                                                                                                                                                        | rating scale                                                                                                                                                                                                                                                                                                           | multiple constructs: care continuity, patient-<br>centered care, long-term care                                     | care integration                        | clinical integration                                            |                                                     |
|      | (98)                                                                   |                                   |      |                       |                                                                                                                                                                                                                                                                          |                                  |                                                                                                                        |                                                       |                                                                                                                                                                                                 |                                                                                                                                                                                                                                                                                                                        |                                                                                                                     |                                         |                                                                 |                                                     |
| 197. | Observing patient<br>involvement scale<br>(OPTION)                     | Elwyn, G. <sup>152</sup>          | 2003 | UK                    | To assess the extent to which<br>practitioners involve patients in<br>decision making processes                                                                                                                                                                          | others:<br>independent<br>raters | independent raters (assess a<br>sample of audiotaped<br>consultations collected from<br>the routine clinics of 21 GPs) | English                                               | 16-item scale (reduced from 18 items)                                                                                                                                                           | rating scale<br>6 point scale: strongly<br>agree, agree, neutral,<br>disagree, strongly disagree<br>(in the pilot study: 5-point<br>scale, anchored at both ends<br>with the words "strongly<br>agree" and "strongly<br>disagree", was used to<br>avoid the loss of scoring<br>efficiency in dichotomized<br>measures. | patient-centered care (i.e., shared decision making)                                                                | patient-centered care                   | clinical integration                                            |                                                     |
|      | (99)                                                                   |                                   |      |                       |                                                                                                                                                                                                                                                                          |                                  |                                                                                                                        |                                                       |                                                                                                                                                                                                 |                                                                                                                                                                                                                                                                                                                        |                                                                                                                     |                                         |                                                                 |                                                     |
| 198. | Oncology Patients'<br>Perception of the Quality<br>of Nursing Care     | Radwin, L. <sup>153</sup>         | 2003 | USA                   | To assess the quality of care<br>experience by oncology<br>department                                                                                                                                                                                                    | patients                         | patients with cancer                                                                                                   | English**                                             | 59 items ( professional knowledge,<br>continuity, attentiveness, coordination,<br>partnership, individualization, rapport and<br>caring) 2 open-ended questions and 11<br>demographic questions | rating scale                                                                                                                                                                                                                                                                                                           | patient-centered care                                                                                               | patient-centered care                   | clinical integration                                            |                                                     |
|      | (100)                                                                  |                                   |      |                       |                                                                                                                                                                                                                                                                          |                                  |                                                                                                                        |                                                       |                                                                                                                                                                                                 |                                                                                                                                                                                                                                                                                                                        |                                                                                                                     |                                         |                                                                 |                                                     |
| 199. | OutPatient Experiences<br>Questionnaire (OPEQ)                         | Garratt <sup>154</sup>            | 2005 | Norway                | To measure patient experiences<br>in hospitals throughout Norway                                                                                                                                                                                                         | patients                         |                                                                                                                        | Norwegian**                                           | 26 items                                                                                                                                                                                        | rating scale<br>10-point scale                                                                                                                                                                                                                                                                                         | patient-centered care (i.e., clinic access,<br>communication, and organization, hospital<br>standards, information) | patient-centered care                   | clinical integration                                            |                                                     |
|      | (101)                                                                  |                                   |      |                       |                                                                                                                                                                                                                                                                          |                                  |                                                                                                                        |                                                       |                                                                                                                                                                                                 |                                                                                                                                                                                                                                                                                                                        |                                                                                                                     |                                         |                                                                 |                                                     |
| 200. | Pain Care Quality<br>(PainCQ)                                          | Pett, M. A. <sup>155</sup>        | 2013 | USA                   | To assess the quality of<br>interdisciplinary care related to<br>pain management                                                                                                                                                                                         | patients                         | cancer patients                                                                                                        | English**                                             | 11 items                                                                                                                                                                                        | rating scale                                                                                                                                                                                                                                                                                                           | patient-centered care                                                                                               | care integration                        | clinical integration                                            | different<br>number of<br>items (item<br>reduction) |
| 201. |                                                                        | Pett, M. A. <sup>155</sup>        | 2013 | USA                   | To assess the quality of nursing<br>care                                                                                                                                                                                                                                 | patients                         | cancer patients                                                                                                        | English**                                             | 22 items                                                                                                                                                                                        | rating scale                                                                                                                                                                                                                                                                                                           | patient-centered care                                                                                               | care integration                        | clinical integration                                            | different<br>number of                              |

|      | Index Instrument<br>(209 index instruments;<br>379 validation studies) | Reference Study<br>(300 articles) | Year | Country     | Purpose of instrument                                                                                                                                                                                                                                                                          | Type of<br>respondent           | Sample population                                                                                                                                                                                                     | Language                               | Description of version, items, and<br>subscales                                                                                                                                                           | Response options                                                                                                                                                               | Construct purported to measure                                                                                                                                               | Construct classification             | Domain<br>classification                                  | Remarks                                    |
|------|------------------------------------------------------------------------|-----------------------------------|------|-------------|------------------------------------------------------------------------------------------------------------------------------------------------------------------------------------------------------------------------------------------------------------------------------------------------|---------------------------------|-----------------------------------------------------------------------------------------------------------------------------------------------------------------------------------------------------------------------|----------------------------------------|-----------------------------------------------------------------------------------------------------------------------------------------------------------------------------------------------------------|--------------------------------------------------------------------------------------------------------------------------------------------------------------------------------|------------------------------------------------------------------------------------------------------------------------------------------------------------------------------|--------------------------------------|-----------------------------------------------------------|--------------------------------------------|
|      |                                                                        |                                   |      |             |                                                                                                                                                                                                                                                                                                |                                 |                                                                                                                                                                                                                       |                                        |                                                                                                                                                                                                           |                                                                                                                                                                                |                                                                                                                                                                              |                                      |                                                           | items (item<br>reduction)                  |
| 202. |                                                                        | Beck <sup>156</sup>               | 2010 | USA         | To measure both the nursing and the interdisciplinary aspects of care related to pain management                                                                                                                                                                                               | patients                        |                                                                                                                                                                                                                       | English                                | 44 items (final)                                                                                                                                                                                          | rating scale<br>6-point Likert type                                                                                                                                            | patient-centered care i.e., being treated right (13 items), safety net (9 items), efficacy of pain management (8 items), and partnership with the healthcare team (14 items) | patient-centered care                | clinical integration                                      | different studies and samples              |
| 203. |                                                                        | Beck <sup>157</sup>               | 2010 | USA         | To measure the quality of nursing and interdisciplinary care related to pain management                                                                                                                                                                                                        | patients                        |                                                                                                                                                                                                                       | English                                | 44 items                                                                                                                                                                                                  | rating scale<br>6-point Likert type                                                                                                                                            | patient-centered care i.e., being treated right (13 items), safety net (9 items), efficacy of pain management (8 items), and partnership with the healthcare team (14 items) | patient-centered care                | clinical integration                                      | different studies and samples              |
|      | (102)                                                                  |                                   |      |             |                                                                                                                                                                                                                                                                                                |                                 |                                                                                                                                                                                                                       |                                        |                                                                                                                                                                                                           |                                                                                                                                                                                |                                                                                                                                                                              |                                      |                                                           |                                            |
| 204. | Parent's Perceptions of Primary Care measure (P3C)                     | Seid <sup>158</sup>               | 2001 | USA         | To measure the quality of primary care received, rather than the quality of a particular provider of primary care.                                                                                                                                                                             | informal caregivers             |                                                                                                                                                                                                                       | English/<br>Spanish/Vietnamese/Tagalog | 23 items                                                                                                                                                                                                  | rating scale                                                                                                                                                                   | multiple constructs: continuity, access, communication, comprehensiveness, coordination                                                                                      | care integration                     | clinical integration                                      |                                            |
|      | (103)                                                                  |                                   |      |             |                                                                                                                                                                                                                                                                                                |                                 |                                                                                                                                                                                                                       |                                        |                                                                                                                                                                                                           |                                                                                                                                                                                |                                                                                                                                                                              |                                      |                                                           |                                            |
| 205. | Parents' Perceptions of Continuity Scale (PPCS)                        | Epstein, E. G. <sup>159</sup>     | 2013 | USA         | To measure relational continuity of care as perceived by parents whose children are hospitalized in intensive care                                                                                                                                                                             | others: parents of NICU infants | parents (to distinguish from other informal caregivers); parents of infants who had been in the NICU for 7 days or longer were invited to participate in the study if they spoke English and were older than 15 years | English                                | modified version of the Perception of Continuity Scale; 24 items                                                                                                                                          | rating scale<br>5-point Likert scale                                                                                                                                           | multiple constructs (i.e., care continuity (main) and family-centeredness)                                                                                                   | care continuity / comprehensive care | clinical integration                                      |                                            |
|      | (104)                                                                  |                                   |      |             |                                                                                                                                                                                                                                                                                                |                                 |                                                                                                                                                                                                                       |                                        |                                                                                                                                                                                                           |                                                                                                                                                                                |                                                                                                                                                                              |                                      |                                                           |                                            |
| 206. | Patient Activation Measure (PAM)                                       | Fowles, J. B. <sup>160</sup>      | 2009 | USA         | To measure the skills, knowledge, beliefs and behaviors that combine to create an activated patient                                                                                                                                                                                            | Others: patients and employees  | patients and employees                                                                                                                                                                                                | English                                | 13 items that assess patient knowledge, skill and confidence for self-management                                                                                                                          | rating scale<br>5-point Likert scale                                                                                                                                           | patient-centered care                                                                                                                                                        | patient-centered care                | clinical integration                                      | different study                            |
| 207. |                                                                        | Skolasky, R. L. <sup>161</sup>    | 2011 | USA         | To measure patient activation                                                                                                                                                                                                                                                                  | patients                        |                                                                                                                                                                                                                       | English                                | 13 items                                                                                                                                                                                                  | rating scale                                                                                                                                                                   | other: patient activation                                                                                                                                                    | patient-centered care                | clinical integration                                      | different study                            |
| 208. |                                                                        | Hibbard <sup>162</sup>            | 2005 | USA         | To assess patient knowledge, skill, and confidence for self-management                                                                                                                                                                                                                         | patients                        |                                                                                                                                                                                                                       | English                                | 13 items (short form (22 items original))                                                                                                                                                                 | rating scale<br>theoretical 0-100 point scale                                                                                                                                  | patient-centered care                                                                                                                                                        | patient-centered care                | clinical integration                                      | different number of items (item reduction) |
| 209. |                                                                        | Hibbard <sup>163</sup>            | 2004 | USA         | A measure of activation                                                                                                                                                                                                                                                                        | patients                        |                                                                                                                                                                                                                       | English                                | 22 items                                                                                                                                                                                                  | rating scale<br>theoretical 0-100 point scale                                                                                                                                  | patient-centered care                                                                                                                                                        | patient-centered care                | clinical integration                                      | different number of items (item reduction) |
|      | (105)                                                                  |                                   |      |             |                                                                                                                                                                                                                                                                                                |                                 |                                                                                                                                                                                                                       |                                        |                                                                                                                                                                                                           |                                                                                                                                                                                |                                                                                                                                                                              |                                      |                                                           |                                            |
| 210. | Patient Acuity Case management Evaluation (PACE tool)                  | Balstad, A. <sup>164</sup>        | 2006 | USA         | To capture the workload acuity of case management nursing services; workload is defined by the degree of difficulty and time requirement associated with case management interventions                                                                                                         | healthcare providers            | case managers - the CRM sample population used throughout this study included the 15 inpatient case managers at Saint Alphonsus Regional Medical Center who perform case management functions                         | English                                | throughout the phases, six key areas were collapsed into four, and within those four key areas the 34 patient need categories were reduced to 26 by combining similar themes to create broader categories | rating scale<br>structured into an acuity tool using a five-point scale (1-5)                                                                                                  | case management i.e., workload in case management (based on patient needs)                                                                                                   | care coordination / case management  | clinical integration                                      |                                            |
|      | (106)                                                                  |                                   |      |             |                                                                                                                                                                                                                                                                                                |                                 |                                                                                                                                                                                                                       |                                        |                                                                                                                                                                                                           |                                                                                                                                                                                |                                                                                                                                                                              |                                      |                                                           |                                            |
| 211. | Patient Assessment of Chronic Illness Care (PACIC)                     | Cramm, J. M. <sup>165</sup>       | 2012 | Netherlands | To evaluate the delivery of the chronic care model                                                                                                                                                                                                                                             | patients                        | all CVD patients participating within the DMPs                                                                                                                                                                        | Dutch                                  | 20 items                                                                                                                                                                                                  | rating scale<br>5 point scale                                                                                                                                                  | chronic care (i.e., related to patient centered care and coordination)                                                                                                       | care integration                     | clinical integration                                      | different number of items (item reduction) |
| 212. |                                                                        | Cramm, J. M. <sup>165</sup>       | 2012 | Netherlands | To evaluate the delivery of the chronic care model                                                                                                                                                                                                                                             | patients                        | all CVD patients participating within the DMPs                                                                                                                                                                        | Dutch                                  | 11 items                                                                                                                                                                                                  | rating scale<br>5 point scale                                                                                                                                                  | chronic care (i.e., related to patient centered care and coordination)                                                                                                       | care integration                     | clinical integration                                      | different number of items (item reduction) |
| 213. |                                                                        | Glasgow, R. E. <sup>166</sup>     | 2005 | USA         | To complement the assessment of chronic illness care (ACIC) by providing a patient perspective on receipt of chronic illness care                                                                                                                                                              | patients                        | enrollees age 50 or older receiving care from 7 primary care clinics within Group Health Cooperative                                                                                                                  | English                                | 20 items                                                                                                                                                                                                  | rating scale<br>Each item was scored on a 5-point scale ranging from 1 (no or never) to 5 (yes or always)                                                                      | chronic care                                                                                                                                                                 | care integration                     | combination (i.e., organizational and system integration) | different study                            |
| 214. |                                                                        | Gugiu, P. C. <sup>167</sup>       | 2009 | USA         | To provide a patient perspective on receipt of chronic illness care                                                                                                                                                                                                                            | patients                        | type 2 diabetic patients                                                                                                                                                                                              | English                                | 20 items                                                                                                                                                                                                  | rating scale<br>11-point percentage scale ranging from 0% to 100% by units of 10%; two end points, 0% and 100%, were anchored by the labels 'Never' and 'Always', respectively | chronic care                                                                                                                                                                 | care integration                     | clinical integration                                      | different study                            |
| 215. |                                                                        | Rosemann, T. <sup>168</sup>       | 2007 | Germany     | To measure the behavior of professionals and practice teams from a patients' perspective                                                                                                                                                                                                       | patients                        | patients with osteoarthritis                                                                                                                                                                                          | German                                 | Note reported; assumed to be 26 items (present behavior, patient counselling, agreement with the patient about realistic goals, assisting patient during his/her lifestyle changes, frequent follow up)   | rating scale                                                                                                                                                                   | chronic care (i.e., chronic care management)                                                                                                                                 | care integration                     | clinical integration                                      | different study                            |
| 216. |                                                                        | Aragones <sup>169</sup>           | 2008 | USA         | To assess care delivered according to the chronic care model in a heterogeneous Spanish-speaking population; provide a patient-centered assessment of the quality of chronic illness care, helping health care teams better understand the level of integration of CCM care in their practices | patients                        |                                                                                                                                                                                                                       | Spanish                                | 20 items                                                                                                                                                                                                  | rating scale<br>5-point Likert scale (none of the time to always)                                                                                                              | chronic care (i.e., level of integration of the chronic care model; chronic care management)                                                                                 | care integration                     | clinical integration                                      | different study                            |

|      | Index Instrument<br>(209 index instruments;<br>379 validation studies) | Reference Study<br>(300 articles)    | Year | Country     | Purpose of instrument                                                                                                                                 | Type of<br>respondent            | Sample population                                                                                                                                                                                                                                                                                                                                                                                                   | Language                   | Description of version, items, and<br>subscales                                                                                                                                                                                                                                                                           | Response options                                                                                                                                                 | Construct purported to measure                                                                                                                                                                                               | Construct classification             | Domain<br>classification                                  | Remarks                                    |
|------|------------------------------------------------------------------------|--------------------------------------|------|-------------|-------------------------------------------------------------------------------------------------------------------------------------------------------|----------------------------------|---------------------------------------------------------------------------------------------------------------------------------------------------------------------------------------------------------------------------------------------------------------------------------------------------------------------------------------------------------------------------------------------------------------------|----------------------------|---------------------------------------------------------------------------------------------------------------------------------------------------------------------------------------------------------------------------------------------------------------------------------------------------------------------------|------------------------------------------------------------------------------------------------------------------------------------------------------------------|------------------------------------------------------------------------------------------------------------------------------------------------------------------------------------------------------------------------------|--------------------------------------|-----------------------------------------------------------|--------------------------------------------|
| 217. |                                                                        | Gugiu <sup>170</sup>                 | 2010 | USA         | A self-report instrument designed to measure the extent to which patients with chronic illness receive care congruent with the chronic care model     | patients                         |                                                                                                                                                                                                                                                                                                                                                                                                                     | English                    | 20 items                                                                                                                                                                                                                                                                                                                  | rating scale changed to an 11-point scale ranging from 0% to 100% by units of 10%, with 0% anchored by the label 'Never' and 100% anchored by the label 'Always' | care coordination                                                                                                                                                                                                            | care integration                     | clinical integration                                      | different study                            |
| 218. |                                                                        | Wensing <sup>171</sup>               | 2008 | Netherlands | To measure patient-reported structured chronic care                                                                                                   | patients                         | patients with diabetes or COPD                                                                                                                                                                                                                                                                                                                                                                                      | Dutch                      | Dutch version; 20 items: five pre-defined domains: patient activation (3 items), delivery system/practice design (3 items), goal setting/tailoring (5 items), problem solving/contextual (4 items), follow-up/coordination (5 items)                                                                                      | rating scale five point response scale (ranging from 1 = 'almost never' to 5 = 'almost always')                                                                  | care integration<br>5 pre-defined domains: patient activation (3 items), delivery system/practice design (3 items), goal setting/tailoring (5 items), problem solving/contextual (4 items), follow-up/coordination (5 items) | care integration                     | clinical integration                                      | different study                            |
|      | (107)                                                                  |                                      |      |             |                                                                                                                                                       |                                  |                                                                                                                                                                                                                                                                                                                                                                                                                     |                            |                                                                                                                                                                                                                                                                                                                           |                                                                                                                                                                  |                                                                                                                                                                                                                              |                                      |                                                           |                                            |
| 219. | Patient Career Diary                                                   | Baker <sup>172</sup>                 | 1999 | UK          | To measure patients' attitudes to care across the interface                                                                                           | patients                         |                                                                                                                                                                                                                                                                                                                                                                                                                     | English                    | 109 items                                                                                                                                                                                                                                                                                                                 | rating scale 5-point scale                                                                                                                                       | care continuity (i.e., attitudes toward care across the interface between primary and secondary care)                                                                                                                        | care integration                     | clinical integration                                      |                                            |
|      | (108)                                                                  |                                      |      |             |                                                                                                                                                       |                                  |                                                                                                                                                                                                                                                                                                                                                                                                                     |                            |                                                                                                                                                                                                                                                                                                                           |                                                                                                                                                                  |                                                                                                                                                                                                                              |                                      |                                                           |                                            |
| 220. | Patient Continuity of Care Questionnaire (PCCQ)                        | Hadjistavropoulos, H. <sup>173</sup> | 2008 | Canada      | To measure continuity of care                                                                                                                         | patients                         | patients discharged from either an Orthopedics unit at one hospital or a Family Medicine unit at a second hospital (Orthopedic inpatients, who had multiple disciplines involved in their care, and Family Medicine inpatients, who were older, suffered from multiple comorbidities and experienced longer lengths of stay due in part to difficulties in discharging patients to the care of community providers) | English                    | 41 items; 27 items prior discharge and 14 items post discharge                                                                                                                                                                                                                                                            | rating scale 5-point Likert scale response format anchored by strongly agree and strongly disagree                                                               | care continuity                                                                                                                                                                                                              | care continuity / comprehensive care | clinical integration                                      |                                            |
|      | (109)                                                                  |                                      |      |             |                                                                                                                                                       |                                  |                                                                                                                                                                                                                                                                                                                                                                                                                     |                            |                                                                                                                                                                                                                                                                                                                           |                                                                                                                                                                  |                                                                                                                                                                                                                              |                                      |                                                           |                                            |
| 221. | Patient Experiences Questionnaire (PEQ)                                | Pettersen <sup>174</sup>             | 2004 | Norway      | To assess patients' care experiences                                                                                                                  | patients                         |                                                                                                                                                                                                                                                                                                                                                                                                                     | not reported               | 35 items                                                                                                                                                                                                                                                                                                                  | rating scale                                                                                                                                                     | patient-centered care                                                                                                                                                                                                        | care integration                     | clinical integration                                      | different study                            |
| 222. |                                                                        | Steine <sup>175</sup>                | 2001 | Norway      | To understand complex process that takes place in a consultation and indicate specific areas for improvement                                          | patients                         |                                                                                                                                                                                                                                                                                                                                                                                                                     | English/<br>Norwegian**    | 25 items                                                                                                                                                                                                                                                                                                                  | rating scale                                                                                                                                                     | other: quality of care                                                                                                                                                                                                       | care integration                     | clinical integration                                      | different study                            |
|      | (110)                                                                  |                                      |      |             |                                                                                                                                                       |                                  |                                                                                                                                                                                                                                                                                                                                                                                                                     |                            |                                                                                                                                                                                                                                                                                                                           |                                                                                                                                                                  |                                                                                                                                                                                                                              |                                      |                                                           |                                            |
| 223. | Patient Perception of Patient-Centeredness Questionnaire (PPPCQ)       | Constand, M. K. <sup>176</sup>       | 2014 | Canada      | To measure patient perspectives on how patient-centered their care is; a valid self-report questionnaire developed for measurement in family practice | patients                         | patients with a distal radius fracture and being able to participate in the study within 10 days of fracture                                                                                                                                                                                                                                                                                                        | English                    | 14 items total; Subscale 1 (items 1-4) relates to how patient illness experiences have been explored; Subscale 2 (items 5-13) relates to how well clinicians and patients were able to find common ground; item 14, relates to patient perceptions of how the clinician attempted to understand him/her as a whole person | rating scale 1 - completely to 4 - not at all                                                                                                                    | patient-centered care                                                                                                                                                                                                        | patient-centered care                | clinical integration                                      |                                            |
|      | (111)                                                                  |                                      |      |             |                                                                                                                                                       |                                  |                                                                                                                                                                                                                                                                                                                                                                                                                     |                            |                                                                                                                                                                                                                                                                                                                           |                                                                                                                                                                  |                                                                                                                                                                                                                              |                                      |                                                           |                                            |
| 224. | Patient Perceptions of Integrated Care Survey                          | Singer, S. J. <sup>177</sup>         | 2013 | USA         | To measure level of integration from patients' perspective                                                                                            | patients                         | patients with multiple chronic conditions                                                                                                                                                                                                                                                                                                                                                                           | English/Spanish/Portuguese | 29 items                                                                                                                                                                                                                                                                                                                  | other dichotomous and Likert scale                                                                                                                               | care integration                                                                                                                                                                                                             | care integration                     | combination (i.e., clinical and professional integration) |                                            |
|      | (112)                                                                  |                                      |      |             |                                                                                                                                                       |                                  |                                                                                                                                                                                                                                                                                                                                                                                                                     |                            |                                                                                                                                                                                                                                                                                                                           |                                                                                                                                                                  |                                                                                                                                                                                                                              |                                      |                                                           |                                            |
| 225. | Patient Reactions Assessment                                           | Galassi <sup>178</sup>               | 1992 | USA         | A visit-specific measure of the perceived quality of the patient-provider relationship that is completed by the patient                               | patients                         | cancer patients                                                                                                                                                                                                                                                                                                                                                                                                     | English                    | 15 items (3 subscales)                                                                                                                                                                                                                                                                                                    | rating scale 7-point Likert scale                                                                                                                                | patient-centered care (i.e., quality of patient-provider relationship)                                                                                                                                                       | patient-centered care                | clinical integration                                      |                                            |
|      | (113)                                                                  |                                      |      |             |                                                                                                                                                       |                                  |                                                                                                                                                                                                                                                                                                                                                                                                                     |                            |                                                                                                                                                                                                                                                                                                                           |                                                                                                                                                                  |                                                                                                                                                                                                                              |                                      |                                                           |                                            |
| 226. | Patient Responses to Nursing Behaviors (PRNB)                          | Kemppainen, J. K. <sup>179</sup>     | 1999 | USA         | To measure cultural competency in African American within the health system                                                                           | patients                         | in-patients with AIDS/HIV                                                                                                                                                                                                                                                                                                                                                                                           | not reported               | 36 items                                                                                                                                                                                                                                                                                                                  | rating scale                                                                                                                                                     | other: patient engagement                                                                                                                                                                                                    | patient-centered care                | clinical integration                                      |                                            |
|      | (114)                                                                  |                                      |      |             |                                                                                                                                                       |                                  |                                                                                                                                                                                                                                                                                                                                                                                                                     |                            |                                                                                                                                                                                                                                                                                                                           |                                                                                                                                                                  |                                                                                                                                                                                                                              |                                      |                                                           |                                            |
| 227. | Patient trust in community pharmacists (TRUST-Ph)                      | Ngorsuraches <sup>180</sup>          | 2008 | Thailand    | To assess patients' trust on community pharmacists                                                                                                    | patients                         |                                                                                                                                                                                                                                                                                                                                                                                                                     | Thai                       | 40 items                                                                                                                                                                                                                                                                                                                  | dichotomous scale                                                                                                                                                | other: trust                                                                                                                                                                                                                 | patient-centered care                | clinical integration                                      | different number of items (item reduction) |
| 228. |                                                                        | Ngorsuraches <sup>180</sup>          | 2008 | Thailand    | To assess patients' trust on community pharmacists                                                                                                    | patients                         |                                                                                                                                                                                                                                                                                                                                                                                                                     | Thai                       | 47 items                                                                                                                                                                                                                                                                                                                  | dichotomous scale                                                                                                                                                | other                                                                                                                                                                                                                        | patient-centered care                | clinical integration                                      | different number of items (item reduction) |
|      | (115)                                                                  |                                      |      |             |                                                                                                                                                       |                                  |                                                                                                                                                                                                                                                                                                                                                                                                                     |                            |                                                                                                                                                                                                                                                                                                                           |                                                                                                                                                                  |                                                                                                                                                                                                                              |                                      |                                                           |                                            |
| 229. | Patient-centered family-focused care (PCFFC)                           | Hannum Rose, J. <sup>181</sup>       | 2007 | USA         | To measure patient-centered, family-focused care                                                                                                      | patients and informal caregivers | patient and caregiver dyad                                                                                                                                                                                                                                                                                                                                                                                          | English                    | 8-item PCFFC scale                                                                                                                                                                                                                                                                                                        | rating scale 4 or 5-point scale                                                                                                                                  | patient-centered care (i.e., patient satisfaction, patient- and family-centeredness)                                                                                                                                         | patient-centered care                | clinical integration                                      |                                            |
|      | (116)                                                                  |                                      |      |             |                                                                                                                                                       |                                  |                                                                                                                                                                                                                                                                                                                                                                                                                     |                            |                                                                                                                                                                                                                                                                                                                           |                                                                                                                                                                  |                                                                                                                                                                                                                              |                                      |                                                           |                                            |



|      | Index Instrument<br>(209 index instruments;<br>379 validation studies)      | Reference Study<br>(300 articles)     | Year | Country     | Purpose of instrument                                                                                                                                                                             | Type of<br>respondent             | Sample population                                                                                              | Language         | Description of version, items, and<br>subscales                                                         | Response options                                                                                                                                                                                                                                                     | Construct purported to measure                               | Construct classification | Domain<br>classification | Remarks         |
|------|-----------------------------------------------------------------------------|---------------------------------------|------|-------------|---------------------------------------------------------------------------------------------------------------------------------------------------------------------------------------------------|-----------------------------------|----------------------------------------------------------------------------------------------------------------|------------------|---------------------------------------------------------------------------------------------------------|----------------------------------------------------------------------------------------------------------------------------------------------------------------------------------------------------------------------------------------------------------------------|--------------------------------------------------------------|--------------------------|--------------------------|-----------------|
| 230. | Patient-Centered Medical Home tool (PCMH)                                   | Alexander, J. A. <sup>182</sup>       | 2013 | USA         | A measure of PCMH implementation suitable for designation, practice improvement, and research purposes                                                                                            | healthcare providers              | self-assessment of primary care practices (as an institution)                                                  | English          | 13 domains (with 128 capabilities/items)                                                                | dichotomous scale capabilities reported as "fully in place" were assigned a value of 1, while capabilities reported as "not in place" were assigned a value of 0; for multiple gradients, we calculated the capability score as a proportion of the maximum gradient | patient-centered care                                        | care integration         | clinical integration     |                 |
|      | (117)                                                                       |                                       |      |             |                                                                                                                                                                                                   |                                   |                                                                                                                |                  |                                                                                                         |                                                                                                                                                                                                                                                                      |                                                              |                          |                          |                 |
| 231. | Patient-Centered Observation Form (PCOF)                                    | Chesser, A. <sup>183</sup>            | 2013 | USA         | An educational assessment tool to improve resident physician-patient communication                                                                                                                | others: observers                 | direct observers: Four independent observers (two faculty clinicians and two social scientists)                | English          | 6 items                                                                                                 | graphic scale rate according to number of elements that apply, i.e., 1 to 3 points indicating provider centered biomedical focus (1) to Patient centered biopsychosocial focus (3)                                                                                   | patient-centered care                                        | patient-centered care    | clinical integration     |                 |
|      | (118)                                                                       |                                       |      |             |                                                                                                                                                                                                   |                                   |                                                                                                                |                  |                                                                                                         |                                                                                                                                                                                                                                                                      |                                                              |                          |                          |                 |
| 232. | Patient-centered questionnaire (PCQ)                                        | Pedro, J. <sup>184</sup>              | 2013 | Portugal    | To assess the patient centered care received by individuals seeking treatment for infertility                                                                                                     | patients                          |                                                                                                                | Portuguese       | 46 items                                                                                                | rating scale                                                                                                                                                                                                                                                         | patient-centered care                                        | patient-centered care    | clinical integration     | different study |
| 233. |                                                                             | van der Eijk, M. <sup>185</sup>       | 2012 | Netherlands | To measure patient experience in PD care                                                                                                                                                          | patients                          | patients with Parkinson's' disease                                                                             | Dutch            | 82 items                                                                                                | rating scale                                                                                                                                                                                                                                                         | patient-centered care                                        | patient-centered care    | clinical integration     | different study |
| 234. |                                                                             | van Empel, I. W. <sup>186</sup>       | 2010 | Netherlands | To measure patient-centeredness in fertility care                                                                                                                                                 | patients                          | infertile couples                                                                                              | Dutch            | 46 items (7 subscales)                                                                                  | other a mix of dichotomous and Likert scale                                                                                                                                                                                                                          | patient-centered care                                        | patient-centered care    | clinical integration     | different study |
|      | (119)                                                                       |                                       |      |             |                                                                                                                                                                                                   |                                   |                                                                                                                |                  |                                                                                                         |                                                                                                                                                                                                                                                                      |                                                              |                          |                          |                 |
| 235. | Patient-centered score sheet                                                | Henbest <sup>187</sup>                | 1989 | Canada      | To measure patient-centered care and was based on the doctor's response to the patient's offer which allowed assessment of the response in the context of the preceding statements by the patient | healthcare providers              | reviewer of doctor-patient interactions                                                                        | English          | none - score sheet depends on a list of items the patient offers the doctor during consultation         | rating scale 4-point scale 0-3 ranging from ignored, open-response, closed-response, and specific facilitation                                                                                                                                                       | patient-centered care                                        | patient-centered care    | clinical integration     |                 |
|      | (120)                                                                       |                                       |      |             |                                                                                                                                                                                                   |                                   |                                                                                                                |                  |                                                                                                         |                                                                                                                                                                                                                                                                      |                                                              |                          |                          |                 |
| 236. | Patient-centered care competency (PCC)                                      | Hwang, J. I. <sup>188</sup>           | 2013 | South Korea | To measure patient-centered care competency (PCC) among hospital nurses in a reliable and economical way (hospital setting)                                                                       | healthcare providers              | nurses in 2 teaching hospitals                                                                                 | English**        | 25 items initially; 17 items, final version                                                             | rating scale 5-point Likert                                                                                                                                                                                                                                          | patient-centered care                                        | patient-centered care    | clinical integration     |                 |
|      | (121)                                                                       |                                       |      |             |                                                                                                                                                                                                   |                                   |                                                                                                                |                  |                                                                                                         |                                                                                                                                                                                                                                                                      |                                                              |                          |                          |                 |
| 237. | Patient-centered instrument for assessment of quality of breast cancer care | de Kok, M. <sup>189</sup>             | 2010 | Netherlands | To combine experiences and needs of breast cancer patients into outcome measures, and offers specific information about the quality of breast cancer care and the need for improvement            | patients                          | breast cancer patients operated on in the previous 3e15 months in five participating hospitals                 | Dutch            | 33 items (after piloting)                                                                               | Other: mixed scales: Four-point Likert-type (1=never; 2=sometimes; 3=usually; 4=always) scales were used for most questions and for a set of items binary (yes, no) answering categories were applied                                                                | patient-centered care                                        | patient-centered care    | clinical integration     |                 |
|      | (122)                                                                       |                                       |      |             |                                                                                                                                                                                                   |                                   |                                                                                                                |                  |                                                                                                         |                                                                                                                                                                                                                                                                      |                                                              |                          |                          |                 |
| 238. | Patient-Centeredness Multi-Choice Questionnaire x (PMQX)                    | Rolfe <sup>190</sup>                  | 1993 | UK          | To assess patient centeredness                                                                                                                                                                    | healthcare providers              |                                                                                                                | English          | 10 items                                                                                                | rating scale                                                                                                                                                                                                                                                         | patient-centered care                                        | patient-centered care    | clinical integration     |                 |
|      | (123)                                                                       |                                       |      |             |                                                                                                                                                                                                   |                                   |                                                                                                                |                  |                                                                                                         |                                                                                                                                                                                                                                                                      |                                                              |                          |                          |                 |
| 239. | Patient-Doctor Depth of Relationship Scale                                  | Ridd <sup>191</sup>                   | 2011 | UK          | To specifically measure patient-doctor depth of relationship.                                                                                                                                     | patients                          |                                                                                                                | English          | 8 items                                                                                                 | rating scale                                                                                                                                                                                                                                                         | patient-centered care (i.e., physician patient relationship) | patient-centered care    | clinical integration     |                 |
|      | (124)                                                                       |                                       |      |             |                                                                                                                                                                                                   |                                   |                                                                                                                |                  |                                                                                                         |                                                                                                                                                                                                                                                                      |                                                              |                          |                          |                 |
| 240. | Patient-Doctor Relationship Questionnaire                                   | Mingote Adan, J. <sup>192</sup>       | 2009 | Spain       | To assess the quality of patient-doctor relationship                                                                                                                                              | patients                          |                                                                                                                | Spanish          | 15 items                                                                                                | rating scale                                                                                                                                                                                                                                                         | patient-centered care (doctor-patient relationship)          | patient-centered care    | clinical integration     |                 |
| 241. |                                                                             | Van der Feltz-Cornelis <sup>193</sup> | 2004 | Netherlands | A brief measure of the therapeutic aspects of the patient-doctor relationship in the primary care setting                                                                                         | patients                          |                                                                                                                | Dutch            | initial 15-item questionnaire reduced to 9 items                                                        | rating scale 5-point response scale                                                                                                                                                                                                                                  | patient-centered care (doctor-patient relationship)          | patient-centered care    | clinical integration     |                 |
|      | (125)                                                                       |                                       |      |             |                                                                                                                                                                                                   |                                   |                                                                                                                |                  |                                                                                                         |                                                                                                                                                                                                                                                                      |                                                              |                          |                          |                 |
| 242. | Patient-relevant hierarchy of needs                                         | Juhnke, C. <sup>194</sup>             | 2013 | Germany     | To identify characteristics, which determine utility, motivation and quality of care from the patient perspective                                                                                 | patients and healthcare providers | based on inclusion and exclusion criteria (age, language skills, cognitive ability, and health status)         | German**         | 84 items                                                                                                | rating scale 5-point response scale: The scale ranged from 'very important', 'important', 'so-so', 'less important' to 'not important'                                                                                                                               | patient-centered care                                        | patient-centered care    | clinical integration     |                 |
|      | (126)                                                                       |                                       |      |             |                                                                                                                                                                                                   |                                   |                                                                                                                |                  |                                                                                                         |                                                                                                                                                                                                                                                                      |                                                              |                          |                          |                 |
| 243. | Patient-reported Interpersonal Processes of Care                            | Stewart, A. L. <sup>195</sup>         | 2007 | USA         | To assess the quality of patient care                                                                                                                                                             | patients                          | adult patients with at least one visit in the prior 12 months sampled from a patient database of adult general | English/ Spanish | started with 85 - 59 - 25 and finally 18 items (communication, decision making and interpersonal style) | rating scale                                                                                                                                                                                                                                                         | patient-centered care                                        | patient-centered care    | clinical integration     |                 |

|      | Index Instrument<br>(209 index instruments;<br>379 validation studies)                        | Reference Study<br>(300 articles) | Year | Country               | Purpose of instrument                                                                                                       | Type of<br>respondent                                   | Sample population                                                                                                                                          | Language            | Description of version, items, and<br>subscales                                                                                                                                                                            | Response options                                                                                                                                                                                                                                                                                                                                                | Construct purported to measure                      | Construct classification                | Domain<br>classification | Remarks                                                                                                         |
|------|-----------------------------------------------------------------------------------------------|-----------------------------------|------|-----------------------|-----------------------------------------------------------------------------------------------------------------------------|---------------------------------------------------------|------------------------------------------------------------------------------------------------------------------------------------------------------------|---------------------|----------------------------------------------------------------------------------------------------------------------------------------------------------------------------------------------------------------------------|-----------------------------------------------------------------------------------------------------------------------------------------------------------------------------------------------------------------------------------------------------------------------------------------------------------------------------------------------------------------|-----------------------------------------------------|-----------------------------------------|--------------------------|-----------------------------------------------------------------------------------------------------------------|
|      |                                                                                               |                                   |      |                       |                                                                                                                             |                                                         | medicine practices at an<br>academic health center                                                                                                         |                     |                                                                                                                                                                                                                            |                                                                                                                                                                                                                                                                                                                                                                 |                                                     |                                         |                          |                                                                                                                 |
|      | (127)                                                                                         |                                   |      |                       |                                                                                                                             |                                                         |                                                                                                                                                            |                     |                                                                                                                                                                                                                            |                                                                                                                                                                                                                                                                                                                                                                 |                                                     |                                         |                          |                                                                                                                 |
| 244. | Patient's Perception of<br>Continuity (PC)                                                    | Chao, J. <sup>196</sup>           | 1988 | USA                   | To describe various aspects of<br>the patient-physician<br>relationship                                                     | patients                                                | patients in the practice<br>database (at least 18 years old,<br>with initial visit in the past 2<br>years; had a more recent visit<br>in the past 2 years) | English             | 23 items                                                                                                                                                                                                                   | rating scale<br>5-point (agree strongly to<br>disagree strongly; definitely<br>true to definitely false)                                                                                                                                                                                                                                                        | care continuity                                     | care continuity /<br>comprehensive care | clinical integration     |                                                                                                                 |
|      | (128)                                                                                         |                                   |      |                       |                                                                                                                             |                                                         |                                                                                                                                                            |                     |                                                                                                                                                                                                                            |                                                                                                                                                                                                                                                                                                                                                                 |                                                     |                                         |                          |                                                                                                                 |
| 245. | Pediatric Patient-Family-<br>Centered Care<br>Benchmarking Survey                             | Carmen, S. <sup>197</sup>         | 2008 | Multiple<br>Countries | To evaluate level of pediatric<br>Patient-Family-Centered Care<br>(PFCC)                                                    | Others: families,<br>institutional<br>leaders and staff | institutional leadership and<br>staff, and families                                                                                                        | English             | Staff version includes 17 subscales with<br>107 items; Families version includes only<br>10 subscales with 58 items because<br>questions related to internal policies that<br>families could not answer were<br>eliminated | rating scale<br>Each item was rated on a 4-<br>point Likert scale ranging<br>from 1 (strongly disagree)<br>(the respondent did not<br>perceive that the PFCC<br>concept was being practiced<br>in the hospital at all) to 4<br>(strongly agree) (the<br>respondent strongly<br>perceived that the PFCC<br>concept was being fully<br>practiced in the hospital) | patient-centered care                               | patient-centered care                   | clinical integration     |                                                                                                                 |
|      | (129)                                                                                         |                                   |      |                       |                                                                                                                             |                                                         |                                                                                                                                                            |                     |                                                                                                                                                                                                                            |                                                                                                                                                                                                                                                                                                                                                                 |                                                     |                                         |                          |                                                                                                                 |
| 246. | Pediatric Trust in Physician<br>Scale (Pedi-TiPS)                                             | Moseley <sup>198</sup>            | 2006 | USA                   | To assess caregivers' trust on<br>their children's doctors                                                                  | informal<br>caregivers                                  |                                                                                                                                                            | English             | 11 items                                                                                                                                                                                                                   | rating scale                                                                                                                                                                                                                                                                                                                                                    | patient-centered care                               | patient-centered care                   | clinical integration     |                                                                                                                 |
|      | (130)                                                                                         |                                   |      |                       |                                                                                                                             |                                                         |                                                                                                                                                            |                     |                                                                                                                                                                                                                            |                                                                                                                                                                                                                                                                                                                                                                 |                                                     |                                         |                          |                                                                                                                 |
| 247. | Perceived Involvement in<br>Care Scale                                                        | Smith <sup>199</sup>              | 2006 | USA                   | To assess pain patients'<br>perceptions of patient health<br>care provider communication<br>during the medical consultation | patients                                                |                                                                                                                                                            | English/<br>Spanish | 20 items                                                                                                                                                                                                                   | rating scale                                                                                                                                                                                                                                                                                                                                                    | patient-centered care (doctor-patient relationship) | patient-centered care                   | clinical integration     |                                                                                                                 |
|      | (131)                                                                                         |                                   |      |                       |                                                                                                                             |                                                         |                                                                                                                                                            |                     |                                                                                                                                                                                                                            |                                                                                                                                                                                                                                                                                                                                                                 |                                                     |                                         |                          |                                                                                                                 |
| 248. | Perceptions of Involvement<br>in Care Scale                                                   | Lerman <sup>200</sup>             | 1990 | USA                   | Assessed patients' perceptions<br>of doctor and patient behaviors<br>that occur during a routine<br>medical visit.          | patients                                                |                                                                                                                                                            | English             | 13 items                                                                                                                                                                                                                   | dichotomous scale                                                                                                                                                                                                                                                                                                                                               | other: perceived involvement                        | patient-centered care                   | clinical integration     |                                                                                                                 |
|      | (132)                                                                                         |                                   |      |                       |                                                                                                                             |                                                         |                                                                                                                                                            |                     |                                                                                                                                                                                                                            |                                                                                                                                                                                                                                                                                                                                                                 |                                                     |                                         |                          |                                                                                                                 |
| 249. | Person-centered Care<br>Assessment Tool (P-CAT)                                               | Rokstad, A. M. <sup>201</sup>     | 2012 | Norway                | To rate to what extent care is<br>person centered (by care staff)                                                           | healthcare<br>providers                                 | care staff working with elderly<br>people in municipalities from<br>every part of Norway                                                                   | Norwegian           | 13 items; personalizing care,<br>organizational support and environmental<br>accessibility                                                                                                                                 | rating scale                                                                                                                                                                                                                                                                                                                                                    | patient-centered care                               | patient-centered care                   | clinical integration     | different study                                                                                                 |
| 250. |                                                                                               | Sjogren, K. <sup>202</sup>        | 2012 | Sweden                | To measure the extent to which<br>staff members rate the care<br>provided as being person-<br>centered                      | healthcare<br>providers                                 | staff at residential unit for<br>older people                                                                                                              | Swedish             | 13 items                                                                                                                                                                                                                   | rating scale                                                                                                                                                                                                                                                                                                                                                    | patient-centered care                               | patient-centered care                   | clinical integration     | different study                                                                                                 |
| 251. |                                                                                               | Edvardsson <sup>203</sup>         | 2010 | Australia             | To measure the extent to which<br>long-term aged care staff rate<br>their settings to be person-<br>centered                | healthcare<br>providers                                 | staff employed in long-term<br>care facilities                                                                                                             | English             | 13 items (final); 39-items (initial)                                                                                                                                                                                       | rating scale<br>5-point Likert-type scale<br>was used for scoring<br>purposes (ranging from 1 =<br>"Disagree completely" to 5<br>= "Agree completely")                                                                                                                                                                                                          | patient-centered care                               | patient-centered care                   | clinical integration     | different study                                                                                                 |
|      | (133)                                                                                         |                                   |      |                       |                                                                                                                             |                                                         |                                                                                                                                                            |                     |                                                                                                                                                                                                                            |                                                                                                                                                                                                                                                                                                                                                                 |                                                     |                                         |                          |                                                                                                                 |
| 252. | Person-centered care of<br>Older People with<br>Cognitive Impairment in<br>Acute Care (POPAC) | Nilsson, A. <sup>204</sup>        | 2013 | Sweden                | To assess the perceived levels<br>of person-centeredness in acute<br>setting                                                | healthcare<br>providers                                 | staff in acute hospitals<br>involved in patient -related<br>work (assistant nurses,<br>registered nurses and<br>physicians)                                | Swedish             | 15 items                                                                                                                                                                                                                   | rating scale                                                                                                                                                                                                                                                                                                                                                    | patient-centered care                               | patient-centered care                   | clinical integration     |                                                                                                                 |
| 253. |                                                                                               | Edvardsson, D. <sup>205</sup>     | 2013 | Australia             | To measure the extent to which<br>acute nursing staff report using<br>best practice care processes                          | healthcare<br>providers                                 | acute care nursing staff                                                                                                                                   | English             | 15 items (from a preliminary 21-item<br>pool)                                                                                                                                                                              | rating scale<br>a six-point Likert type scale<br>with the following response<br>options rated as 1-6: never,<br>very rarely, rarely,<br>frequently, very frequently<br>and always                                                                                                                                                                               | patient-centered care                               | patient-centered care                   | clinical integration     | different study                                                                                                 |
|      | (134)                                                                                         |                                   |      |                       |                                                                                                                             |                                                         |                                                                                                                                                            |                     |                                                                                                                                                                                                                            |                                                                                                                                                                                                                                                                                                                                                                 |                                                     |                                         |                          |                                                                                                                 |
| 254. | Processes Index (measure<br>of person-centered<br>planning) <sup>^^</sup>                     | Holburn, S. <sup>206</sup>        | 2000 | USA                   | To measure processes of<br>person-centered planning                                                                         | healthcare<br>providers                                 | planning teams (person-<br>centered and traditional<br>interdisciplinary)                                                                                  | English             | 20 items                                                                                                                                                                                                                   | rating scale<br>response options were<br>presented in the order of<br>most to least desirable                                                                                                                                                                                                                                                                   | patient-centered care                               | care integration                        | clinical integration     | analysis was<br>performed<br>using the<br>combined<br>items in the<br>Process and<br>Outcome<br>indicators only |
|      | (135)                                                                                         |                                   |      |                       |                                                                                                                             |                                                         |                                                                                                                                                            |                     |                                                                                                                                                                                                                            |                                                                                                                                                                                                                                                                                                                                                                 |                                                     |                                         |                          |                                                                                                                 |
| 255. | Outcomes index<br>(measure of person-<br>centered planning) <sup>^^</sup>                     | Holburn, S. <sup>206</sup>        | 2000 | USA                   | To measure experiences of<br>person-centered planning                                                                       | healthcare<br>providers                                 | planning teams (person-<br>centered and traditional<br>interdisciplinary)                                                                                  | English             | 51 items                                                                                                                                                                                                                   | rating scale<br>response options were<br>presented in the order of<br>most to least desirable                                                                                                                                                                                                                                                                   | patient-centered care                               | care integration                        | clinical integration     | analysis was<br>performed<br>using the<br>combined<br>items in the<br>Process and<br>Outcome<br>indicators only |

|      | Index Instrument<br>(209 index instruments;<br>379 validation studies)                                                                                          | Reference Study<br>(300 articles) | Year | Country            | Purpose of instrument                                                                                                                                                                                                                                   | Type of respondent               | Sample population                                                                                                                                                                     | Language                                    | Description of version, items, and subscales                                                                                    | Response options                                                                                                                                                                   | Construct purported to measure                                                                       | Construct classification             | Domain classification | Remarks         |
|------|-----------------------------------------------------------------------------------------------------------------------------------------------------------------|-----------------------------------|------|--------------------|---------------------------------------------------------------------------------------------------------------------------------------------------------------------------------------------------------------------------------------------------------|----------------------------------|---------------------------------------------------------------------------------------------------------------------------------------------------------------------------------------|---------------------------------------------|---------------------------------------------------------------------------------------------------------------------------------|------------------------------------------------------------------------------------------------------------------------------------------------------------------------------------|------------------------------------------------------------------------------------------------------|--------------------------------------|-----------------------|-----------------|
|      | (136)                                                                                                                                                           |                                   |      |                    |                                                                                                                                                                                                                                                         |                                  |                                                                                                                                                                                       |                                             |                                                                                                                                 |                                                                                                                                                                                    |                                                                                                      |                                      |                       |                 |
| 256. | Person-centered Climate Questionnaire (PCCQ)                                                                                                                    | Bergland, A. <sup>207</sup>       | 2012 | Norway             | To measure the extent to which staff perceive the nursing home climate to be person-centered (i.e., climate, holistic experience of the environment)                                                                                                    | healthcare providers             | healthcare and support                                                                                                                                                                | Norwegian (originally developed in Swedish) | 14 items; three subscales (safety, everydayness, and community)                                                                 | rating scale<br>6-point Likert scale (1 = no, I disagree completely, to 6 = yes, I agree completely)                                                                               | patient-centered care                                                                                | patient-centered care                | clinical integration  | different study |
| 257. |                                                                                                                                                                 | Edvardsson, D. <sup>208</sup>     | 2009 | Australia          | A self-report instrument designed for use for evaluating to what extent the climate of health care settings are perceived as being person centered                                                                                                      | patients                         | hospital patients                                                                                                                                                                     | English                                     | 17 items (climate of the unit being indicative of the climate in the setting)                                                   | rating scale<br>7-step Likert scale (ranging between 1 = no, I disagree completely to 7 = yes, I agree completely)                                                                 | patient-centered care                                                                                | patient-centered care                | clinical integration  | different study |
| 258. |                                                                                                                                                                 | Edvardsson, D. <sup>209</sup>     | 2010 | Australia          | To evaluate to what extent the climates of health care settings are perceived as being person centered by staff                                                                                                                                         | healthcare providers             | health care and support staff working at an Australian hospital facility providing short-stay elective surgery, diagnostic procedures and other planned services for public hospitals | English                                     | 14 items                                                                                                                        | rating scale<br>Likert scale (ranging from 1 = No, I very strongly disagree to 6 = Yes, I very strongly agree)                                                                     | patient-centered care                                                                                | patient-centered care                | clinical integration  | different study |
| 259. |                                                                                                                                                                 | Edvardsson, D. <sup>210</sup>     | 2008 | Sweden             | To measure the extent to which the climate (physical and psychosocial environment) of acute to sub-acute hospital care settings is person-centered, i.e., supports the patient as person and places their needs and expectations at the center of care. | patients                         | hospital patients (medical, surgical and psychiatric inpatient)                                                                                                                       | Swedish                                     | 17 items (initially 45 items) with three factors                                                                                | rating scale<br>7-point Likert scale was used for response options (ranging 1 = No, I disagree completely to 7 = Yes, I agree completely)                                          | patient-centered care                                                                                | patient-centered care                | clinical integration  | different study |
| 260. |                                                                                                                                                                 | Edvardsson, D. <sup>211</sup>     | 2009 | Sweden             | To measure to what extent the climate of health care settings is experienced as person centered by staff                                                                                                                                                | healthcare providers             | all healthcare staff in a sample of 25 hospital wards                                                                                                                                 | Swedish                                     | 14 items (initially 45)                                                                                                         | rating scale<br>6-point scale (1 = No, I disagree completely, to 6 = Yes, I agree completely)                                                                                      | patient-centered care                                                                                | patient-centered care                | clinical integration  | different study |
|      | (137)                                                                                                                                                           |                                   |      |                    |                                                                                                                                                                                                                                                         |                                  |                                                                                                                                                                                       |                                             |                                                                                                                                 |                                                                                                                                                                                    |                                                                                                      |                                      |                       |                 |
| 261. | Person-Centered Health Care for Older Adults Survey                                                                                                             | Dow, B. <sup>212</sup>            | 2013 | Australia          | To measure current practice in person-centered care in the inpatient hospital setting from the point of view of healthcare staff                                                                                                                        | healthcare providers             |                                                                                                                                                                                       | English                                     | 31 items following item reduction (initially 48 items)                                                                          | rating scale<br>5-point scale ranging from 1 (strongly disagree) to 5 (strongly agree) for the attitude and belief questions or 1 (never) to 5 (always) for the practice questions | patient-centered care                                                                                | patient-centered care                | clinical integration  |                 |
|      | (138)                                                                                                                                                           |                                   |      |                    |                                                                                                                                                                                                                                                         |                                  |                                                                                                                                                                                       |                                             |                                                                                                                                 |                                                                                                                                                                                    |                                                                                                      |                                      |                       |                 |
| 262. | Person-directed Care (PDC)                                                                                                                                      | White, D. L. <sup>213</sup>       | 2008 | USA                | To assess the person directed practices in long term care                                                                                                                                                                                               | healthcare providers             | Direct Care Workers (DCWs), nurses, administrators, housekeeping, therapists, social services                                                                                         | English                                     | 64 items                                                                                                                        | rating scale                                                                                                                                                                       | patient-centered care                                                                                | patient-centered care                | clinical integration  |                 |
|      | (139)                                                                                                                                                           |                                   |      |                    |                                                                                                                                                                                                                                                         |                                  |                                                                                                                                                                                       |                                             |                                                                                                                                 |                                                                                                                                                                                    |                                                                                                      |                                      |                       |                 |
| 263. | Pharmacy Service Orientation Measure                                                                                                                            | Clark, B. E. <sup>214</sup>       | 2006 | USA                | To assess pharmacists' impressions of pharmacy practice sites                                                                                                                                                                                           | healthcare providers             | pharmacy graduates                                                                                                                                                                    | English                                     | 3 items                                                                                                                         | semantic differential<br>semantic differential scale evaluations of a pharmacy worksite by a person working at that site                                                           | patient-centered care                                                                                | patient-centered care                | clinical integration  |                 |
|      | (140)                                                                                                                                                           |                                   |      |                    |                                                                                                                                                                                                                                                         |                                  |                                                                                                                                                                                       |                                             |                                                                                                                                 |                                                                                                                                                                                    |                                                                                                      |                                      |                       |                 |
| 264. | Pickier Commonwealth Patient Centered Care Questionnaire                                                                                                        | Ryan, M. E. <sup>215</sup>        | 1995 | USA                | To assess patient and family perception of hospital experience and to further assess the extent to which hospitalized patients experience problems with care                                                                                            | patients                         |                                                                                                                                                                                       | English**                                   | 90-95 items                                                                                                                     | rating scale                                                                                                                                                                       | patient-centered care                                                                                | patient-centered care                | clinical integration  |                 |
|      | (141)                                                                                                                                                           |                                   |      |                    |                                                                                                                                                                                                                                                         |                                  |                                                                                                                                                                                       |                                             |                                                                                                                                 |                                                                                                                                                                                    |                                                                                                      |                                      |                       |                 |
| 265. | Postoperative Handover Assessment Tool (PoHAT)                                                                                                                  | Nagpal, K. <sup>216</sup>         | 2011 | Multiple Countries | To assess the quality of handover                                                                                                                                                                                                                       | others                           | trained researchers                                                                                                                                                                   | English**                                   | 29 items; patient information. Anesthetic information, surgical information. Tasks - equipment tasks and patient specific tasks | not reported                                                                                                                                                                       | care continuity                                                                                      | care continuity / comprehensive care | clinical integration  |                 |
|      | (142)                                                                                                                                                           |                                   |      |                    |                                                                                                                                                                                                                                                         |                                  |                                                                                                                                                                                       |                                             |                                                                                                                                 |                                                                                                                                                                                    |                                                                                                      |                                      |                       |                 |
| 266. | Prescriptions, Ready to reenter the community, Placement, Assurance of Safety, Realistic Expectations, Empowerment, Directed to appropriate services (PREPARED) | Grimmer <sup>217</sup>            | 2001 | Australia          | To gather information on community stakeholder perceptions of the quality of the process and outcome of discharge planning activities                                                                                                                   | patients and informal caregivers | patients, carers (hospital staff interviews for instrument development only)                                                                                                          | English                                     | 16 process and 7 outcome questions (patients); 14 process and 6 outcome questions (carers)                                      | other<br>not reported (searched for the tool, 4-point response scale)                                                                                                              | care coordination (i.e., discharge planning quality, care coordination, care continuity, management) | care coordination / case management  | clinical integration  |                 |
|      | (143)                                                                                                                                                           |                                   |      |                    |                                                                                                                                                                                                                                                         |                                  |                                                                                                                                                                                       |                                             |                                                                                                                                 |                                                                                                                                                                                    |                                                                                                      |                                      |                       |                 |
| 267. | Primary Care Assessment Survey (PCAS)                                                                                                                           | Beaulieu, M. D. <sup>39</sup>     | 2011 | Canada             | To rate aspect of talking with regular doctor (for interpersonal communication subscale); rate the personal aspects of care from regular doctor (for the interpersonal treatment subscale)                                                              | patients                         | healthcare users balanced by English/ French language, rural/urban location, low/high level of education and poor/average/excellent overall PHC experience                            | French/English                              | 11 items (2 subscales) = 6 (interpersonal communication); 5 (interpersonal treatment)                                           | rating scale<br>Likert evaluative; 1=very poor to 6=excellent                                                                                                                      | patient-centered care (i.e., interpersonal communication)                                            | patient-centered care                | clinical integration  | different study |

|      | Index Instrument<br>(209 index instruments;<br>379 validation studies) | Reference Study<br>(300 articles) | Year | Country     | Purpose of instrument                                                                                                                                                                                                                     | Type of<br>respondent            | Sample population                                                                                                                                                                             | Language                                                          | Description of version, items, and<br>subscales                                                                                                                                                                                                                                                 | Response options                                                           | Construct purported to measure                                                                                                                                                                                                                                                                                                                            | Construct classification                | Domain<br>classification                                    | Remarks                                    |
|------|------------------------------------------------------------------------|-----------------------------------|------|-------------|-------------------------------------------------------------------------------------------------------------------------------------------------------------------------------------------------------------------------------------------|----------------------------------|-----------------------------------------------------------------------------------------------------------------------------------------------------------------------------------------------|-------------------------------------------------------------------|-------------------------------------------------------------------------------------------------------------------------------------------------------------------------------------------------------------------------------------------------------------------------------------------------|----------------------------------------------------------------------------|-----------------------------------------------------------------------------------------------------------------------------------------------------------------------------------------------------------------------------------------------------------------------------------------------------------------------------------------------------------|-----------------------------------------|-------------------------------------------------------------|--------------------------------------------|
| 268. |                                                                        | Burge <sup>42</sup>               | 2011 | Canada      | To rate the frequency of seeing the regular doctor (not an assistant or partner) for a check-up or routine care; when sick                                                                                                                | patients                         |                                                                                                                                                                                               | French and English (had to check related article for this detail) | 2 of 24 items                                                                                                                                                                                                                                                                                   | rating scale<br>Likert frequency                                           | care continuity (i.e., relational continuity)                                                                                                                                                                                                                                                                                                             | care continuity /<br>comprehensive care | professional<br>integration                                 | different study                            |
| 269. |                                                                        | Haggerty <sup>43</sup>            | 2011 | Canada      | Mapped attributes: accessibility, relational continuity, interpersonal processes of care, respectfulness, management continuity                                                                                                           | patients                         |                                                                                                                                                                                               | French and English                                                | Item distribution: Accessibility (6), Relational Continuity [Visit-based] (2), Interpersonal comma (14), respectfulness (5), Management continuity [Integration] (6)                                                                                                                            | rating scale<br>1 to 6 scale                                               | multiple constructs: care integration, care continuity, patient-centered care                                                                                                                                                                                                                                                                             | care integration                        | combination (i.e., clinical and organizational integration) | different study                            |
| 270. |                                                                        | Haggerty <sup>44</sup>            | 2011 | Canada      | To assess primary care in terms of the integration subscale                                                                                                                                                                               | patients                         | healthcare users                                                                                                                                                                              | French and English                                                | 6 items                                                                                                                                                                                                                                                                                         | rating scale<br>Likert scale 1 to 6                                        | care integration                                                                                                                                                                                                                                                                                                                                          | care integration                        | organizational<br>integration                               | different study                            |
| 271. |                                                                        | Haggerty <sup>83</sup>            | 2011 | Canada      | To measure organizational access - rate doctor's office for: location, hours, usual wait for an appointment; usual wait at the clinic, ability to get through to the doctor's office or to speak to the doctor by phone                   | patients                         | healthcare users                                                                                                                                                                              | French and English                                                | 6 items                                                                                                                                                                                                                                                                                         | rating scale<br>Likert evaluative (1 to 6)                                 | other: organizational access                                                                                                                                                                                                                                                                                                                              | care continuity /<br>comprehensive care | organizational<br>integration                               | different study                            |
| 272. |                                                                        | Safran <sup>218</sup>             | 1998 | USA         | To measure the primary care performance                                                                                                                                                                                                   | patients                         |                                                                                                                                                                                               | English**                                                         | 49 items                                                                                                                                                                                                                                                                                        | rating scale                                                               | other: financial, organizational access, contextual knowledge of patient, integration, communication, interpersonal treatment, trust                                                                                                                                                                                                                      | patient-centered care                   | combination (i.e., clinical, organization, normative)       | different study                            |
|      | (144)                                                                  |                                   |      |             |                                                                                                                                                                                                                                           |                                  |                                                                                                                                                                                               |                                                                   |                                                                                                                                                                                                                                                                                                 |                                                                            |                                                                                                                                                                                                                                                                                                                                                           |                                         |                                                             |                                            |
| 273. | Primary Care Assessment<br>Tool (PCAT)                                 | Haggerty, J. L. <sup>41</sup>     | 2011 | Canada      | To measure comprehensive services available                                                                                                                                                                                               | patients                         | healthcare users                                                                                                                                                                              | English                                                           | 4 items                                                                                                                                                                                                                                                                                         | rating scale<br>Likert evaluative;<br>1=definitely not to 4=<br>definitely | comprehensive care                                                                                                                                                                                                                                                                                                                                        | care continuity /<br>comprehensive care | clinical integration                                        | different study                            |
| 274. |                                                                        | Haggerty, J. L. <sup>41</sup>     | 2011 | Canada      | To measure first contact utilization                                                                                                                                                                                                      | patients                         | healthcare users                                                                                                                                                                              | English                                                           | 3 items                                                                                                                                                                                                                                                                                         | rating scale<br>Likert evaluative;<br>1=definitely not to 4=<br>definitely | comprehensive care                                                                                                                                                                                                                                                                                                                                        | care continuity /<br>comprehensive care | clinical integration                                        | different study                            |
| 275. |                                                                        | Haggerty, J. L. <sup>41</sup>     | 2011 | Canada      | To measure community orientation                                                                                                                                                                                                          | patients                         | healthcare users                                                                                                                                                                              | English                                                           | 3 items                                                                                                                                                                                                                                                                                         | rating scale<br>Likert evaluative;<br>1=definitely not to 4=<br>definitely | comprehensive care                                                                                                                                                                                                                                                                                                                                        | care continuity /<br>comprehensive care | clinical integration                                        | different study                            |
| 276. |                                                                        | Jeon, K. Y. <sup>219</sup>        | 2011 | South Korea | A primary care assessment tool - short form of the original PCAT                                                                                                                                                                          | patients                         | Patients (consumers or clients) were eligible if they were above 17 years of age and were visitors to various kinds of specialty or general clinics which participated in first-contact care. | Korean                                                            | 37 items                                                                                                                                                                                                                                                                                        | rating scale<br>4-point scale                                              | multiple constructs: first contact utilization, first contact accessibility, ongoing accountable care (ongoing care and coordinated rapport care), integrated care (patient-centered care with integration between primary and specialty care or between different specialties), comprehensive care, community-oriented care and culturally-oriented care | care integration                        | clinical integration                                        | different number of items (item reduction) |
| 277. |                                                                        | Jeon, K. Y. <sup>219</sup>        | 2011 | South Korea | To measure seven characteristic domains of primary care with only minor modifications and covers the original, classic concept of primary care                                                                                            | patients                         | Patients (consumers or clients) were eligible if they were above 17 years of age and were visitors to various kinds of specialty or general clinics which participated in first-contact care. | Korean                                                            | 30 items                                                                                                                                                                                                                                                                                        | rating scale<br>4-point scale                                              | multiple constructs: first contact utilization, first contact accessibility, ongoing accountable care (ongoing care and coordinated rapport care), integrated care (patient-centered care with integration between primary and specialty care or between different specialties), comprehensive care, community-oriented care and culturally-oriented care | care integration                        | clinical integration                                        | different number of items (item reduction) |
| 278. |                                                                        | Burge <sup>42</sup>               | 2011 | Canada      | To measure likelihood of seeing same doctor or nurse each time; ability to phone the doctor or nurse who knows best; known as a person, not only as a medical problem; provider knows what problems are most important for the respondent | patients                         |                                                                                                                                                                                               | French and English (had to check related article for this detail) | 4 of 24 items                                                                                                                                                                                                                                                                                   | rating scale<br>Likert evaluative                                          | care continuity (i.e., relational continuity)                                                                                                                                                                                                                                                                                                             | care continuity /<br>comprehensive care | professional<br>integration                                 | different study                            |
| 279. |                                                                        | Cassady <sup>220</sup>            | 2000 | USA         | To evaluate the attainment of the key characteristics of primary care services for children and youth                                                                                                                                     | informal caregivers              | parents/guardians of offspring 18 years old or less                                                                                                                                           | English                                                           | 33 primary care items in 5 domains                                                                                                                                                                                                                                                              | rating scale<br>Likert scale (1 to 4)                                      | multiple constructs: comprehensive care, care coordination, integration                                                                                                                                                                                                                                                                                   | care integration                        | organizational<br>integration                               | different study                            |
| 280. |                                                                        | Haggerty <sup>43</sup>            | 2011 | Canada      | To measure accessibility/comprehensiveness, relational continuity, whole person care, management continuity                                                                                                                               | patients                         |                                                                                                                                                                                               | French and English                                                | Subscale version: accessibility/comprehensiveness, relational continuity, whole person care, management continuity<br><br>Item distribution: Accessibility (7), Relational Continuity [Visit-based] (4), Comprehensiveness (4), Whole-person care (3), Management Continuity [coordination] (4) | rating scale<br>1 to 4 scale                                               | multiple constructs: care integration, care continuity, patient-centered care, comprehensive care                                                                                                                                                                                                                                                         | care integration                        | combination (i.e., clinical and organizational)             | different versions and subscales           |
| 281. |                                                                        | Haggerty <sup>44</sup>            | 2011 | Canada      | To assess primary care in terms of the coordination subscale                                                                                                                                                                              | patients                         |                                                                                                                                                                                               | French and English                                                | Subscale version: coordination<br><br>4 items                                                                                                                                                                                                                                                   | rating scale<br>4-point scale                                              | care coordination                                                                                                                                                                                                                                                                                                                                         | care integration                        | organizational<br>integration                               | different versions and subscales           |
| 282. |                                                                        | Haggerty <sup>83</sup>            | 2011 | Canada      | To assess primary care in terms of first-contact utilization and access                                                                                                                                                                   | patients                         |                                                                                                                                                                                               | French and English                                                | Subscale version: first-contact utilization and access<br><br>7 items                                                                                                                                                                                                                           | rating scale<br>Likert evaluative (1 to 4)                                 | care coordination                                                                                                                                                                                                                                                                                                                                         | care continuity /<br>comprehensive care | organizational<br>integration                               | different versions and subscales           |
| 283. |                                                                        | Lee <sup>221</sup>                | 2009 | South Korea | To assess the performance of the primary care                                                                                                                                                                                             | patients and informal caregivers |                                                                                                                                                                                               | Korean                                                            | 21 items                                                                                                                                                                                                                                                                                        | rating scale                                                               | care integration                                                                                                                                                                                                                                                                                                                                          | care integration                        | clinical integration                                        | different study                            |

|      | Index Instrument<br>(209 index instruments;<br>379 validation studies) | Reference Study<br>(300 articles) | Year | Country            | Purpose of instrument                                                                                                                                                                                                                                        | Type of<br>respondent            | Sample population                                                                                                                                                                    | Language         | Description of version, items, and<br>subscales                                                                                                                   | Response options                                                                             | Construct purported to measure                                                                                                                                                                                     | Construct classification | Domain<br>classification | Remarks                             |
|------|------------------------------------------------------------------------|-----------------------------------|------|--------------------|--------------------------------------------------------------------------------------------------------------------------------------------------------------------------------------------------------------------------------------------------------------|----------------------------------|--------------------------------------------------------------------------------------------------------------------------------------------------------------------------------------|------------------|-------------------------------------------------------------------------------------------------------------------------------------------------------------------|----------------------------------------------------------------------------------------------|--------------------------------------------------------------------------------------------------------------------------------------------------------------------------------------------------------------------|--------------------------|--------------------------|-------------------------------------|
| 284. |                                                                        | Macinko <sup>222</sup>            | 2007 | Brazil             | To assess the performance of primary care                                                                                                                                                                                                                    | patients                         |                                                                                                                                                                                      | Portuguese       | 100 items                                                                                                                                                         | rating scale                                                                                 | multiple constructs: accessibility, coordination, family focused, community orientation, provider characteristics                                                                                                  | care integration         | clinical integration     | different study                     |
| 285. |                                                                        | Shi <sup>223</sup>                | 2001 | USA                | To measure the extent and quality of primary care services                                                                                                                                                                                                   | patients                         |                                                                                                                                                                                      | English          | 92 items                                                                                                                                                          | rating scale                                                                                 | care integration                                                                                                                                                                                                   | care integration         | clinical integration     | different study                     |
|      | (145)                                                                  |                                   |      |                    |                                                                                                                                                                                                                                                              |                                  |                                                                                                                                                                                      |                  |                                                                                                                                                                   |                                                                                              |                                                                                                                                                                                                                    |                          |                          |                                     |
| 286. | Primary Care Behavioral Health Provider Adherence Questionnaire (PPAQ) | Beehler, G. P. <sup>224</sup>     | 2013 | USA                | A self-report measure of BHP (behavioral health provider) protocol adherence to ccc (co-located collaborative care) models                                                                                                                                   | healthcare providers             | VA BHPs who provided clinical services in primary care for at least 25 % of their duties, had an active VA email account, and with sufficient time to complete a brief online survey | English          | 54 items                                                                                                                                                          | rating scale five-point Likert-type response scale ranging from "never" to "always"          | care integration (note: healthcare integration is measured as "protocol adherence to CCC (co-located collaborative care) models")                                                                                  | care integration         | professional integration |                                     |
|      | (146)                                                                  |                                   |      |                    |                                                                                                                                                                                                                                                              |                                  |                                                                                                                                                                                      |                  |                                                                                                                                                                   |                                                                                              |                                                                                                                                                                                                                    |                          |                          |                                     |
| 287. | Prostate Care Questionnaire for Patients (PCQ-P)                       | Tarrant <sup>225</sup>            | 2009 | UK                 | To measure patient experience of prostate cancer care                                                                                                                                                                                                        | patients                         |                                                                                                                                                                                      | English          | 106 items plus 10 demographic questionnaires                                                                                                                      | rating scale                                                                                 | patient-centered care                                                                                                                                                                                              | care integration         | clinical integration     |                                     |
|      | (147)                                                                  |                                   |      |                    |                                                                                                                                                                                                                                                              |                                  |                                                                                                                                                                                      |                  |                                                                                                                                                                   |                                                                                              |                                                                                                                                                                                                                    |                          |                          |                                     |
| 288. | Quality Care Questionnaire-End of Life (QCQ-EOL)                       | Yun <sup>226</sup>                | 2006 | South Korea        | To measure the quality of EOL care                                                                                                                                                                                                                           | patients                         |                                                                                                                                                                                      | Korean           | 16 items                                                                                                                                                          | rating scale 4-point scale                                                                   | care integration (i.e., multiple constructs of quality of care)                                                                                                                                                    | care integration         | clinical integration     |                                     |
|      | (148)                                                                  |                                   |      |                    |                                                                                                                                                                                                                                                              |                                  |                                                                                                                                                                                      |                  |                                                                                                                                                                   |                                                                                              |                                                                                                                                                                                                                    |                          |                          |                                     |
| 289. | Quality from Patient's Perspective                                     | Wilde <sup>227</sup>              | 1994 | Sweden             | To measure quality of care from a patient perspective                                                                                                                                                                                                        | patients                         | patients with infectious diseases                                                                                                                                                    | Swedish**        | 56 items                                                                                                                                                          | rating scale                                                                                 | patient-centered care                                                                                                                                                                                              | patient-centered care    | clinical integration     | different samples in the same study |
| 290. |                                                                        | Wilde <sup>227</sup>              | 1994 | Sweden             | To measure quality of care from a patient perspective                                                                                                                                                                                                        | patients                         | nursing students (as patient)                                                                                                                                                        | Swedish**        | 56 items and 41 items (short form)                                                                                                                                | rating scale                                                                                 | patient-centered care                                                                                                                                                                                              | patient-centered care    | clinical integration     | different samples in the same study |
|      | (149)                                                                  |                                   |      |                    |                                                                                                                                                                                                                                                              |                                  |                                                                                                                                                                                      |                  |                                                                                                                                                                   |                                                                                              |                                                                                                                                                                                                                    |                          |                          |                                     |
| 291. | Quality of Care Through the Patients' Eyes (QUOTE)                     | van Weert, J. C. <sup>228</sup>   | 2009 | Netherlands        | To assess patients' perception of the extent to which specific aspects of information and communication was considered important at the beginning                                                                                                            | patients                         | patients diagnosed with cancer                                                                                                                                                       | Dutch            | Quality Of Care Through The Patients' Eyes (QUOTE) – Chemo: Importance; 69 items                                                                                  | rating scale                                                                                 | patient-centered care (i.e., patient-centered care communication)                                                                                                                                                  | patient-centered care    | clinical integration     | different response scales           |
| 292. |                                                                        | van Weert, J. C. <sup>228</sup>   | 2009 | Netherlands        | To assess patients opinion on their experience in communication                                                                                                                                                                                              | patients                         | patients diagnosed with cancer                                                                                                                                                       | Dutch            | Quality Of Care Through The Patients' Eyes (QUOTE) – Chemo: Performance; 69 items                                                                                 | dichotomous scale                                                                            | patient-centered care (i.e., patient-centered care communication)                                                                                                                                                  | patient-centered care    | clinical integration     | different response scales           |
| 293. |                                                                        | Nijkamp <sup>229</sup>            | 2002 | Netherlands        | To measure the quality of care from a cataract patient's perspective, which attempts to overcome these problems                                                                                                                                              | patients                         |                                                                                                                                                                                      | Dutch            | Quality Of Care Through The Patients' Eyes (QUOTE) – Cataract; 31 items                                                                                           | rating scale                                                                                 | other: quality of care                                                                                                                                                                                             | care integration         | clinical integration     | different versions                  |
| 294. |                                                                        | Sixma <sup>230</sup>              | 2000 | Netherlands        | To assess the quality of care from the perspective of an elderly person                                                                                                                                                                                      | patients                         |                                                                                                                                                                                      | Dutch            | Quality Of Care Through The Patients' Eyes (QUOTE) – Elderly; 59 items (37 generic and 22 category specific quality aspects)                                      | rating scale                                                                                 | other: quality of care                                                                                                                                                                                             | care integration         | clinical integration     | different versions                  |
| 295. |                                                                        | van Campen <sup>231</sup>         | 1998 | Netherlands        | To measure quality of health care services from the perspective of customers                                                                                                                                                                                 | patients                         | rheumatic patients                                                                                                                                                                   | Dutch            | Quality Of Care Through The Patients' Eyes (QUOTE) – Rheumatic Patient; 32 indicators of quality of health care: 16 generic and 16 rheumatism-specific indicators | rating scale 4-point scale                                                                   | care integration i.e., subscales of structure quality (eight indicators), process quality (eight indicators) for the general part, generic quality (16 indicators) and rheumatism-specific quality (16 indicators) | care integration         | clinical integration     | different versions                  |
| 296. |                                                                        | van der Eijk <sup>232</sup>       | 2001 | Multiple Countries | To measure quality of care through the eyes of patients with IBD                                                                                                                                                                                             | patients                         | validation of the questionnaire were conducted in The Netherlands and involved only Dutch patients                                                                                   | Dutch            | Quality Of Care Through The Patients' Eyes (QUOTE) – Inflammatory Bowel Disease; 23 items                                                                         | rating scale 4-point scale                                                                   | care integration i.e., multiple constructs - accessibility, costs, accommodation, continuity of care, courtesy, information, competence, and autonomy                                                              | care integration         | clinical integration     | different versions                  |
|      | (150)                                                                  |                                   |      |                    |                                                                                                                                                                                                                                                              |                                  |                                                                                                                                                                                      |                  |                                                                                                                                                                   |                                                                                              |                                                                                                                                                                                                                    |                          |                          |                                     |
| 297. | Quality of Dying and Death (QODD)                                      | Curtis, J. R. <sup>233</sup>      | 2002 | USA                | To elicit the families' perspectives of patients' experiences with the goal of measuring the degree to which a person's preferences for dying and the moment of death are consistent with observations of how the person actually died as reported by others | informal caregivers              | decedent's next of kin                                                                                                                                                               | English          | 31 items                                                                                                                                                          | rating scale rated on a scale from 0 (terrible experience) to 10 (almost perfect experience) | chronic care (i.e., Quality of Dying and Death, subscale of "Communication with the Health Care Team, Satisfaction with Care")                                                                                     | care integration         | clinical integration     |                                     |
|      | (151)                                                                  |                                   |      |                    |                                                                                                                                                                                                                                                              |                                  |                                                                                                                                                                                      |                  |                                                                                                                                                                   |                                                                                              |                                                                                                                                                                                                                    |                          |                          |                                     |
| 298. | Quality of End-of-life care and Satisfaction with Treatment (QUEST)    | Sulmasy <sup>234</sup>            | 2002 | USA                | To assess patients and surrogates perception of quality and satisfaction of the health services they received                                                                                                                                                | patients and informal caregivers |                                                                                                                                                                                      | English/ Spanish | 30 items                                                                                                                                                          | rating scale                                                                                 | other: quality of care - patient centered care                                                                                                                                                                     | patient-centered care    | clinical integration     |                                     |
|      | (152)                                                                  |                                   |      |                    |                                                                                                                                                                                                                                                              |                                  |                                                                                                                                                                                      |                  |                                                                                                                                                                   |                                                                                              |                                                                                                                                                                                                                    |                          |                          |                                     |
| 299. | Quality of end-of-life communication (QOC)                             | Engelberg <sup>235</sup>          | 2006 | USA                | A patient-centered, patient-completed questionnaire evaluating satisfaction with the quality of physicians' communication about end-of-life care                                                                                                             | patients and informal caregivers | hospice and COPD patients, and family members                                                                                                                                        | English          | 13 items                                                                                                                                                          | rating scale scale from 0 to 10                                                              | patient-centered care (i.e., communication)                                                                                                                                                                        | patient-centered care    | clinical integration     |                                     |
|      | (153)                                                                  |                                   |      |                    |                                                                                                                                                                                                                                                              |                                  |                                                                                                                                                                                      |                  |                                                                                                                                                                   |                                                                                              |                                                                                                                                                                                                                    |                          |                          |                                     |



|      | Index Instrument<br>(209 index instruments;<br>379 validation studies)           | Reference Study<br>(300 articles) | Year | Country | Purpose of instrument                                                                                                                                                                        | Type of<br>respondent         | Sample population                                                                                                                  | Language  | Description of version, items, and<br>subscales                                                                                                                                                                                                                                                                                                                             | Response options                                                                          | Construct purported to measure                                                                | Construct classification             | Domain<br>classification               | Remarks                       |
|------|----------------------------------------------------------------------------------|-----------------------------------|------|---------|----------------------------------------------------------------------------------------------------------------------------------------------------------------------------------------------|-------------------------------|------------------------------------------------------------------------------------------------------------------------------------|-----------|-----------------------------------------------------------------------------------------------------------------------------------------------------------------------------------------------------------------------------------------------------------------------------------------------------------------------------------------------------------------------------|-------------------------------------------------------------------------------------------|-----------------------------------------------------------------------------------------------|--------------------------------------|----------------------------------------|-------------------------------|
| 300. | Quality of Family Experience (QUAL-E FAM)                                        | Steinhauser, K. E. <sup>236</sup> | 2014 | USA     | To measure the quality of family experience                                                                                                                                                  | informal caregivers           | family members of terminally ill patients admitted to general medicine service                                                     | English** | The resulting version of the QUAL-E (Fam) included 25 items: eight causal indicators for symptoms and preparation (assessing financial strain, level of preparedness, level of peace, and level of peace about care), 15 effect indicators, and two individual items representing quality of experience (overall experience) and quality of life (you overall)              | rating scale                                                                              | other: quality of care                                                                        | patient-centered care                | clinical integration                   |                               |
|      | (154)                                                                            |                                   |      |         |                                                                                                                                                                                              |                               |                                                                                                                                    |           |                                                                                                                                                                                                                                                                                                                                                                             |                                                                                           |                                                                                               |                                      |                                        |                               |
| 301. | Quality of Psychiatric Care                                                      | Schroder, A. <sup>237</sup>       | 2010 | Sweden  | To assess the quality of high quality psychiatric care                                                                                                                                       | patients                      | inpatient admitted to general psychiatric ward                                                                                     | Swedish** | 69 items; dignity, security, participation, recovery, environment                                                                                                                                                                                                                                                                                                           | rating scale                                                                              | patient-centered care                                                                         | care integration                     | clinical integration                   |                               |
|      | (155)                                                                            |                                   |      |         |                                                                                                                                                                                              |                               |                                                                                                                                    |           |                                                                                                                                                                                                                                                                                                                                                                             |                                                                                           |                                                                                               |                                      |                                        |                               |
| 302. | Race-based Medical Mistrust                                                      | Shelton <sup>238</sup>            | 2010 | USA     | To measure race-based medical mistrust: the suspicion of mainstream health care systems and professionals and the treatment provided to individuals of the respondent's ethnic/ racial group | others: general public        | members of the public                                                                                                              | English   | 12 items                                                                                                                                                                                                                                                                                                                                                                    | rating scale                                                                              | Other: mistrust                                                                               | patient-centered care                | clinical integration                   |                               |
|      | (156)                                                                            |                                   |      |         |                                                                                                                                                                                              |                               |                                                                                                                                    |           |                                                                                                                                                                                                                                                                                                                                                                             |                                                                                           |                                                                                               |                                      |                                        |                               |
| 303. | Relational and management continuity of care Questionnaire                       | Gulliford, M. <sup>239</sup>      | 2011 | UK      | To measure continuity of care in long-term illness                                                                                                                                           | patients                      | people aged 60 years and older from 15 general practices (with 0-more than 4 long-term conditions)                                 | English   | 7 items on management continuity, 10 items on relational continuity, 4 items on access and flexibility = 21 total for continuity and access items; 13 items on Self-Administered Comorbidity Questionnaire                                                                                                                                                                  | rating scale<br>4-point Likert                                                            | care continuity                                                                               | care continuity / comprehensive care | clinical integration                   |                               |
|      | (157)                                                                            |                                   |      |         |                                                                                                                                                                                              |                               |                                                                                                                                    |           |                                                                                                                                                                                                                                                                                                                                                                             |                                                                                           |                                                                                               |                                      |                                        |                               |
| 304. | Relational Communication Scale                                                   | Gallagher <sup>240</sup>          | 2001 | USA     | An observational instrument to rate doctor patient interaction                                                                                                                               | others: observers             | doctor-patient interactions; medical students and standardized patients were rated                                                 | English   | 34 items                                                                                                                                                                                                                                                                                                                                                                    | other<br>direct observation                                                               | patient-centered care (i.e., doctor-patient relationship)                                     | patient-centered care                | clinical integration                   | different versions            |
| 305. | Relational communication scale for observational measurement (RCS-O)             | Gallagher, T. J. <sup>241</sup>   | 2005 | USA     | To measure the nonverbal communication of physicians interacting with patients                                                                                                               | others: observers             | trained observers                                                                                                                  | English   | 34 items                                                                                                                                                                                                                                                                                                                                                                    | rating scale<br>7-point Likert scale ranging from "strongly disagree" to "strongly agree" | patient-centered care (i.e., doctor-patient communication)                                    | patient-centered care                | clinical integration                   | different versions            |
|      | (158)                                                                            |                                   |      |         |                                                                                                                                                                                              |                               |                                                                                                                                    |           |                                                                                                                                                                                                                                                                                                                                                                             |                                                                                           |                                                                                               |                                      |                                        |                               |
| 306. | Revised Health Care System Distrust Scale                                        | Shea <sup>242</sup>               | 2008 | USA     | To measure distrust on the health system from patients' perspective                                                                                                                          | patients                      |                                                                                                                                    | English   | 26 items                                                                                                                                                                                                                                                                                                                                                                    | rating scale                                                                              | patient-centered care                                                                         | patient-centered care                | clinical integration                   |                               |
|      | (159)                                                                            |                                   |      |         |                                                                                                                                                                                              |                               |                                                                                                                                    |           |                                                                                                                                                                                                                                                                                                                                                                             |                                                                                           |                                                                                               |                                      |                                        |                               |
| 307. | Rochester Participatory Decision-Making Scale (RPAD)                             | Shields <sup>243</sup>            | 2005 | USA     | To assess objective measure of physician behaviors that encourage participatory decision making                                                                                              | others:<br>independent raters | independent raters                                                                                                                 | English   | 9 items                                                                                                                                                                                                                                                                                                                                                                     | rating scale                                                                              | patient-centered care (i.e., physician-patient collaboration in decision making)              | patient-centered care                | clinical integration                   |                               |
|      | (160)                                                                            |                                   |      |         |                                                                                                                                                                                              |                               |                                                                                                                                    |           |                                                                                                                                                                                                                                                                                                                                                                             |                                                                                           |                                                                                               |                                      |                                        |                               |
| 308. | Safety Net Medical Home Scale (SNMHS)                                            | Birnberg, J. M. <sup>244</sup>    | 2011 | USA     | To evaluate PCMH interventions in safety-net clinics; to describe PCMH adoption in safety-net clinics beginning a PCMH intervention                                                          | healthcare providers          | single respondent per organization                                                                                                 | English   | 52 items: with 16 core items, that were organized into six domains: Access and Communication (12 items, 4 core items), Patient Tracking and Registry (7 items, 3 core items), Care Management (8 items, 2 core items), Test and Referral Tracking (4 items, 2 core items), Quality Improvement (10 items, 2 core items), and External Coordination (11 items, 3 core items) | dichotomous scale<br>40 items (dichotomous)                                               | patient-centered care (i.e., adoption of patient-centered medical home, measure PCMH domains) | care integration                     | clinical integration                   |                               |
|      | (161)                                                                            |                                   |      |         |                                                                                                                                                                                              |                               |                                                                                                                                    |           |                                                                                                                                                                                                                                                                                                                                                                             |                                                                                           |                                                                                               |                                      |                                        |                               |
| 309. | Scale of Functional Integration                                                  | Ahgren, B. <sup>245</sup>         | 2005 | Sweden  | To evaluate the degree of integration in local health care and similar arrangements of integrated care                                                                                       | healthcare providers          | integration ranks were reported per healthcare unit based on consensus                                                             | English   | one scale is used to derive integration ranks for specific health care units identified (28 health care units)                                                                                                                                                                                                                                                              | graphic scale<br>integration rank                                                         | care integration (i.e., degree of integration)                                                | care integration                     | other: functional clinical integration |                               |
|      | (162)                                                                            |                                   |      |         |                                                                                                                                                                                              |                               |                                                                                                                                    |           |                                                                                                                                                                                                                                                                                                                                                                             |                                                                                           |                                                                                               |                                      |                                        |                               |
| 310. | Scale To Assess Therapeutic Relationships in Community Mental Health Care (STAR) | McGuire-Snieckus <sup>246</sup>   | 2007 | Sweden  | To measure the therapeutic relationships in community mental health care                                                                                                                     | patients                      |                                                                                                                                    | Swedish   | 12 items                                                                                                                                                                                                                                                                                                                                                                    | rating scale                                                                              | other: therapeutic relationship between patients and clinicians                               | patient-centered care                | clinical integration                   | different type of respondents |
| 311. |                                                                                  | McGuire-Snieckus <sup>246</sup>   | 2007 | Sweden  | To assess therapeutic relationships in community mental health care from clinicians perspectives                                                                                             | healthcare providers          | community psychiatric nurses (68%), social workers (17%), occupational therapists (8%), psychologists (3%), and psychiatrists (1%) | Swedish   | 12 items                                                                                                                                                                                                                                                                                                                                                                    | rating scale                                                                              | other: therapeutic relationship between patients and clinicians                               | patient-centered care                | clinical integration                   | different type of respondents |
|      | (163)                                                                            |                                   |      |         |                                                                                                                                                                                              |                               |                                                                                                                                    |           |                                                                                                                                                                                                                                                                                                                                                                             |                                                                                           |                                                                                               |                                      |                                        |                               |
| 312. | Service Quality Questionnaire                                                    | Tomes <sup>247</sup>              | 1995 | UK      | To assess service quality in inpatient setting                                                                                                                                               | patients                      |                                                                                                                                    | English   | 49 items                                                                                                                                                                                                                                                                                                                                                                    | rating scale                                                                              | patient-centered care                                                                         | care integration                     | clinical integration                   |                               |
|      | (164)                                                                            |                                   |      |         |                                                                                                                                                                                              |                               |                                                                                                                                    |           |                                                                                                                                                                                                                                                                                                                                                                             |                                                                                           |                                                                                               |                                      |                                        |                               |
| 313. | SERVQUAL                                                                         | Babakus, E. <sup>248</sup>        | 1992 | USA     | To measure service quality that would apply across a broad range of services with minor modifications in the scale                                                                           | patients                      |                                                                                                                                    | English   | 22 pairs (expectations and perceptions)                                                                                                                                                                                                                                                                                                                                     | rating scale<br>7-point Likert scale (later modified to 5-point scale)                    | patient satisfaction (i.e., service quality)                                                  | care integration                     | clinical integration                   | different study               |

|      | Index Instrument<br>(209 index instruments;<br>379 validation studies) | Reference Study<br>(300 articles) | Year | Country     | Purpose of instrument                                                                                                                                                                                                                                                                        | Type of respondent                   | Sample population                                                                                                                                                                                                                                  | Language  | Description of version, items, and subscales                                                                                                                                                                                                                             | Response options                                                                                                                                                                                                                                                                                                                                                                                                                                                                                                                                            | Construct purported to measure                                                                                                                                                                                                             | Construct classification             | Domain classification                                                | Remarks                                    |
|------|------------------------------------------------------------------------|-----------------------------------|------|-------------|----------------------------------------------------------------------------------------------------------------------------------------------------------------------------------------------------------------------------------------------------------------------------------------------|--------------------------------------|----------------------------------------------------------------------------------------------------------------------------------------------------------------------------------------------------------------------------------------------------|-----------|--------------------------------------------------------------------------------------------------------------------------------------------------------------------------------------------------------------------------------------------------------------------------|-------------------------------------------------------------------------------------------------------------------------------------------------------------------------------------------------------------------------------------------------------------------------------------------------------------------------------------------------------------------------------------------------------------------------------------------------------------------------------------------------------------------------------------------------------------|--------------------------------------------------------------------------------------------------------------------------------------------------------------------------------------------------------------------------------------------|--------------------------------------|----------------------------------------------------------------------|--------------------------------------------|
| 314. |                                                                        | Vandamme <sup>249</sup>           | 1993 | Belgium     | A multiple item scale for measuring consumer perception of service quality (applied in the healthcare sector)                                                                                                                                                                                | patients                             | volunteer patients                                                                                                                                                                                                                                 | English** | 28 items (quality related: tangibles, reliability, responsiveness, assurance, empathy)                                                                                                                                                                                   | rating scale<br>7point Likert scale                                                                                                                                                                                                                                                                                                                                                                                                                                                                                                                         | care integration (i.e., multiple constructs related to integrated care)                                                                                                                                                                    | care integration                     | clinical integration                                                 | different study                            |
|      | (165)                                                                  |                                   |      |             |                                                                                                                                                                                                                                                                                              |                                      |                                                                                                                                                                                                                                                    |           |                                                                                                                                                                                                                                                                          |                                                                                                                                                                                                                                                                                                                                                                                                                                                                                                                                                             |                                                                                                                                                                                                                                            |                                      |                                                                      |                                            |
| 315. | Survivor Unmet Needs Survey (SUNS)                                     | Campbell, H. S. <sup>250</sup>    | 2014 | Canada      | A standardized measure of unmet needs for cancer survivors; developed and psychometrically evaluated with a population-based sample of cancer survivors                                                                                                                                      | patients                             | sample of cancer survivors from 3 cancer registries; 19 years of age and over at diagnosis, alive, with a histologically confirmed cancer diagnosis in the preceding 12 to 60 months                                                               | English   | 89 original SUNS; item reduction resulted in a total of 30 items for the final shortened version                                                                                                                                                                         | rating scale<br>response options range from 0 to 4, with 0 representing 'no unmet need' and 4 representing a 'very high unmet need'                                                                                                                                                                                                                                                                                                                                                                                                                         | multiple constructs: unmet needs based on 5 main domains: information; financial concerns; access and continuity of care; relationships; emotional health (most relevant constructs would be patient-centered care and continuity of care) | patient-centered care                | clinical integration                                                 | different study                            |
| 316. |                                                                        | Campbell, H. S. <sup>251</sup>    | 2010 | Canada      | To measure unmet needs in six domains: information (15 items), job and financial needs (14 items); daily living needs (four items); medical care (55 items); relationship needs (26 items) and emotional and mental health (38 needs). an open-ended question allowed additional unmet needs | patients                             | cancer survivors                                                                                                                                                                                                                                   | English   | 89 items across five subscales                                                                                                                                                                                                                                           | rating scale<br>five-point Likert type scale ranging from zero (no unmet need) to four (very high unmet need) was adopted since consumer feedback indicated that this was easiest to understand                                                                                                                                                                                                                                                                                                                                                             | multiple constructs                                                                                                                                                                                                                        | patient-centered care                | clinical integration                                                 | different study                            |
| 317. |                                                                        | Hodgkinson, K. <sup>252</sup>     | 2007 | Australia   | To help address the gap in the literature regarding the supportive care needs of partners of long term cancer survivors                                                                                                                                                                      | others: partners of cancer survivors | partners who were recruited through survivors participating in one of three separate studies                                                                                                                                                       | English   | 47 items                                                                                                                                                                                                                                                                 | rating scale<br>Frequency of need; The response format was based upon the format in the CaSUN. Partners are asked to indicate whether they have (a) 'no need, or need is not applicable', or (b) 'have need, but need is being met' or, (c) if they do experience a need, how strong the need is ('weak'/'moderate'/'strong'). Positive change items offer four response options ('yes, but I have always been like this', 'yes, this has been a positive outcome', 'no, and I would like help to achieve this', or 'no, and this is not important to me'). | patient-centered care                                                                                                                                                                                                                      | patient-centered care                | clinical integration                                                 | different number of items (item reduction) |
| 318. |                                                                        | Hodgkinson, K. <sup>253</sup>     | 2007 | Australia   | A self-report measure of cancer survivors' supportive care needs                                                                                                                                                                                                                             | patients                             | Eligibility criteria included receiving a cancer diagnosis one or more years earlier, disease-free, over 18 years of age at the time of diagnosis, able to communicate in English, and the absence of major psychiatric or intellectual impairment | English   | after modification: 35 unmet need items, 6 positive change items and an open-ended question                                                                                                                                                                              | rating scale<br>Responses were therefore scored in respect to no need =0; met need =1; and unmet need =2                                                                                                                                                                                                                                                                                                                                                                                                                                                    | patient-centered care                                                                                                                                                                                                                      | patient-centered care                | clinical integration                                                 | different number of items (item reduction) |
|      | (166)                                                                  |                                   |      |             |                                                                                                                                                                                                                                                                                              |                                      |                                                                                                                                                                                                                                                    |           |                                                                                                                                                                                                                                                                          |                                                                                                                                                                                                                                                                                                                                                                                                                                                                                                                                                             |                                                                                                                                                                                                                                            |                                      |                                                                      |                                            |
| 319. | Systematic Culture Inquiry On Patient safety in primary care (SCOPE)   | Zwart, D. L. <sup>254</sup>       | 2011 | Netherlands | To measure patient safety culture in GP                                                                                                                                                                                                                                                      | healthcare providers                 | GP, medical administrative assistant, practice nurse                                                                                                                                                                                               | Dutch     | 46 items (dimension: teamwork, adequate shift changes, frequency of event reporting, non-punitive response to error, communication openness, feedback and communication about error, supervisor expectations and action promoting patient safety, hospital mgmt., staff, | rating scale                                                                                                                                                                                                                                                                                                                                                                                                                                                                                                                                                | Other: patient safety                                                                                                                                                                                                                      | patient-centered care                | clinical integration                                                 |                                            |
|      | (167)                                                                  |                                   |      |             |                                                                                                                                                                                                                                                                                              |                                      |                                                                                                                                                                                                                                                    |           |                                                                                                                                                                                                                                                                          |                                                                                                                                                                                                                                                                                                                                                                                                                                                                                                                                                             |                                                                                                                                                                                                                                            |                                      |                                                                      |                                            |
| 320. | Systematic Monitoring of Male Circumcision Scale-Up                    | Omondi Aduda <sup>255</sup>       | 2014 | Kenya       | A service quality assessment tool to assess availability of guidelines, supplies and equipment, infection control, and continuity of care services                                                                                                                                           | others: observers                    | direct observation                                                                                                                                                                                                                                 | English   | 54 item measures                                                                                                                                                                                                                                                         | other<br>direct observation                                                                                                                                                                                                                                                                                                                                                                                                                                                                                                                                 | care continuity (i.e., quality of care including care continuity)                                                                                                                                                                          | care continuity / comprehensive care | clinical integration                                                 |                                            |
|      | (168)                                                                  |                                   |      |             |                                                                                                                                                                                                                                                                                              |                                      |                                                                                                                                                                                                                                                    |           |                                                                                                                                                                                                                                                                          |                                                                                                                                                                                                                                                                                                                                                                                                                                                                                                                                                             |                                                                                                                                                                                                                                            |                                      |                                                                      |                                            |
| 321. | Team Emergency Assessment Measure (TEAM)                               | Cooper <sup>256</sup>             | 2010 | Australia   | Teamwork assessment measure for emergency resuscitation team performance                                                                                                                                                                                                                     | healthcare providers                 | expert assessors (resuscitation trainers/clinicians)                                                                                                                                                                                               | English   | 12 items                                                                                                                                                                                                                                                                 | rating scale<br>5-point scale (0-4, never to always)                                                                                                                                                                                                                                                                                                                                                                                                                                                                                                        | other: teamwork                                                                                                                                                                                                                            | care coordination / case management  | professional integration                                             |                                            |
|      | (169)                                                                  |                                   |      |             |                                                                                                                                                                                                                                                                                              |                                      |                                                                                                                                                                                                                                                    |           |                                                                                                                                                                                                                                                                          |                                                                                                                                                                                                                                                                                                                                                                                                                                                                                                                                                             |                                                                                                                                                                                                                                            |                                      |                                                                      |                                            |
| 322. | Team Evaluation and Assessment Measure (TEAM)                          | Taylor, C. <sup>257</sup>         | 2012 | UK          | To measure the performance of multidisciplinary care team                                                                                                                                                                                                                                    | healthcare providers                 | team members of cancer multidisciplinary care teams                                                                                                                                                                                                | English** | 47 items covered all 17 subdomains of team working with particular emphasis on Leadership and Chairing; Team working and Culture; Patient-centered care; Clinical decision-making process; and Organization and administration during meeting                            | rating scale                                                                                                                                                                                                                                                                                                                                                                                                                                                                                                                                                | care coordination (i.e., team based care)                                                                                                                                                                                                  | care coordination / case management  | combination (i.e., clinical, professional and normative integration) |                                            |
|      | (170)                                                                  |                                   |      |             |                                                                                                                                                                                                                                                                                              |                                      |                                                                                                                                                                                                                                                    |           |                                                                                                                                                                                                                                                                          |                                                                                                                                                                                                                                                                                                                                                                                                                                                                                                                                                             |                                                                                                                                                                                                                                            |                                      |                                                                      |                                            |

|      | Index Instrument<br>(209 index instruments;<br>379 validation studies) | Reference Study<br>(300 articles) | Year | Country     | Purpose of instrument                                                                                                                                                                                                                                          | Type of<br>respondent                   | Sample population                                                                                                                                                                                                                               | Language        | Description of version, items, and<br>subscales                                                                                                                    | Response options                                                                                                                                                                                            | Construct purported to measure                                      | Construct classification                | Domain<br>classification | Remarks                                       |
|------|------------------------------------------------------------------------|-----------------------------------|------|-------------|----------------------------------------------------------------------------------------------------------------------------------------------------------------------------------------------------------------------------------------------------------------|-----------------------------------------|-------------------------------------------------------------------------------------------------------------------------------------------------------------------------------------------------------------------------------------------------|-----------------|--------------------------------------------------------------------------------------------------------------------------------------------------------------------|-------------------------------------------------------------------------------------------------------------------------------------------------------------------------------------------------------------|---------------------------------------------------------------------|-----------------------------------------|--------------------------|-----------------------------------------------|
| 323. | The Human Connection<br>Scale                                          | Mack <sup>258</sup>               | 2009 | USA         | To measure the extent to which<br>patients felt a sense of mutual<br>understanding, caring, and trust<br>with their physicians.                                                                                                                                | patients                                |                                                                                                                                                                                                                                                 | English/Spanish | 16 items                                                                                                                                                           | rating scale                                                                                                                                                                                                | other: therapeutic alliance - physician and patients<br>interaction | patient-centered care                   | clinical integration     |                                               |
|      | (171)                                                                  |                                   |      |             |                                                                                                                                                                                                                                                                |                                         |                                                                                                                                                                                                                                                 |                 |                                                                                                                                                                    |                                                                                                                                                                                                             |                                                                     |                                         |                          |                                               |
| 324. | Therapy Alliance Scale                                                 | Pinsof, W. M. <sup>259</sup>      | 2008 | USA         | To assess the quality of care<br>received by clients during<br>couple therapy                                                                                                                                                                                  | patients                                | clients seeking help for couple                                                                                                                                                                                                                 | not reported    | 40 items                                                                                                                                                           | rating scale                                                                                                                                                                                                | patient-centered care                                               | patient-centered care                   | clinical integration     | different<br>sample and<br>number of<br>items |
| 325. |                                                                        | Pinsof, W. M. <sup>259</sup>      | 2008 | USA         | To assess the quality of care<br>(relationship) with therapies<br>during family therapy                                                                                                                                                                        | patients                                | clients seeking help for family                                                                                                                                                                                                                 | not reported    | 40 items                                                                                                                                                           | rating scale                                                                                                                                                                                                | patient-centered care                                               | patient-centered care                   | clinical integration     | different<br>sample and<br>number of<br>items |
| 326. |                                                                        | Pinsof, W. M. <sup>259</sup>      | 2008 | USA         | To assess team work between<br>therapies and patients during<br>treatment                                                                                                                                                                                      | patients                                | clients seeking help for<br>individual                                                                                                                                                                                                          | not reported    | 36 items                                                                                                                                                           | rating scale                                                                                                                                                                                                | patient-centered care                                               | patient-centered care                   | clinical integration     | different<br>sample and<br>number of<br>items |
|      | (172)                                                                  |                                   |      |             |                                                                                                                                                                                                                                                                |                                         |                                                                                                                                                                                                                                                 |                 |                                                                                                                                                                    |                                                                                                                                                                                                             |                                                                     |                                         |                          |                                               |
| 327. | Trust in Nurses Scale                                                  | Radwin <sup>260</sup>             | 2010 | USA         | To assess patients trust on<br>nurses services received                                                                                                                                                                                                        | patients                                |                                                                                                                                                                                                                                                 | English**       | 5 items                                                                                                                                                            | rating scale                                                                                                                                                                                                | other: trust                                                        | patient-centered care                   | clinical integration     | different<br>number of<br>items               |
| 328. |                                                                        | Radwin <sup>260</sup>             | 2010 | USA         | To assess patients trust on<br>nurses services received                                                                                                                                                                                                        | patients                                |                                                                                                                                                                                                                                                 | English**       | 4 items                                                                                                                                                            | rating scale                                                                                                                                                                                                | other: trust                                                        | patient-centered care                   | clinical integration     | different<br>number of<br>items               |
| 329. |                                                                        | Radwin <sup>261</sup>             | 2005 | USA         | To measure the level of trust of<br>patients towards nurses                                                                                                                                                                                                    | patients                                |                                                                                                                                                                                                                                                 | English         | 5 items                                                                                                                                                            | rating scale                                                                                                                                                                                                | other: trust                                                        | patient-centered care                   | clinical integration     | different study                               |
|      | (173)                                                                  |                                   |      |             |                                                                                                                                                                                                                                                                |                                         |                                                                                                                                                                                                                                                 |                 |                                                                                                                                                                    |                                                                                                                                                                                                             |                                                                     |                                         |                          |                                               |
| 330. | Trust in Oncologist Scale<br>(TiOS)                                    | Hillen <sup>262</sup>             | 2012 | Netherlands | To measure cancer patients'<br>trust in their oncologist                                                                                                                                                                                                       | patients                                |                                                                                                                                                                                                                                                 | Dutch           | 33 items initially; 18 items following<br>item reduction                                                                                                           | rating scale<br>5-point Likert scale<br>( 'strongly disagree'=1 to<br>'strongly agree'=5)                                                                                                                   | other: trust                                                        | patient-centered care                   | clinical integration     |                                               |
|      | (174)                                                                  |                                   |      |             |                                                                                                                                                                                                                                                                |                                         |                                                                                                                                                                                                                                                 |                 |                                                                                                                                                                    |                                                                                                                                                                                                             |                                                                     |                                         |                          |                                               |
| 331. | Trust in Physicians Scale                                              | Anderson <sup>263</sup>           | 1990 | USA         | To assess each patient's<br>interpersonal trust in his<br>primary care physician within<br>the context of the management<br>of chronic disease                                                                                                                 | patients                                | outpatients                                                                                                                                                                                                                                     | English         | 11 items                                                                                                                                                           | rating scale<br>five-point Likert format,<br>with response options<br>ranging from "strongly<br>agree" to "strongly<br>disagree"                                                                            | other: trust                                                        | patient-centered care                   | clinical integration     | different study                               |
| 332. |                                                                        | Freburger <sup>264</sup>          | 2003 | USA         | Focuses on the process of care<br>and includes questions on the<br>patient's trust in the<br>physician's advice, opinions,<br>and choice of medical<br>treatment. it does not examine<br>beliefs about the physician's<br>ability to affect health<br>outcomes | patients                                | rheumatology clinic patients                                                                                                                                                                                                                    | English         | 11 items                                                                                                                                                           | rating scale<br>5-point Likert scale ranging<br>from 1 (strongly disagree)<br>to 5 (strongly agree)                                                                                                         | other: trust                                                        | patient-centered care                   | clinical integration     | different study                               |
| 333. |                                                                        | Thom <sup>265</sup>               | 1999 | USA         | To assess the trust towards<br>physicians                                                                                                                                                                                                                      | patients                                |                                                                                                                                                                                                                                                 | English         | 11 items                                                                                                                                                           | rating scale                                                                                                                                                                                                | patient-centered care                                               | patient-centered care                   | clinical integration     | different study                               |
|      | (175)                                                                  |                                   |      |             |                                                                                                                                                                                                                                                                |                                         |                                                                                                                                                                                                                                                 |                 |                                                                                                                                                                    |                                                                                                                                                                                                             |                                                                     |                                         |                          |                                               |
| 334. | Trust in the Medical<br>Profession                                     | Hall <sup>266</sup>               | 2002 | USA         | A multi-item measure for<br>general trust in physicians                                                                                                                                                                                                        | patients                                | with regular physician and<br>source of payment                                                                                                                                                                                                 | English         | 11 items (resulting scale)                                                                                                                                         | rating scale<br>5-point scale                                                                                                                                                                               | other: trust                                                        | patient-centered care                   | clinical integration     |                                               |
|      | (176)                                                                  |                                   |      |             |                                                                                                                                                                                                                                                                |                                         |                                                                                                                                                                                                                                                 |                 |                                                                                                                                                                    |                                                                                                                                                                                                             |                                                                     |                                         |                          |                                               |
| 335. | Tucker Culturally Sensitive<br>Healthcare Inventory (T-<br>CUSHCI)     | Mirsu-Paun, A. <sup>267</sup>     | 2010 | USA         | To measure the behaviors and<br>attitudes that mostly low<br>income racially/ethnically<br>diverse primary care patients<br>have indicated to be important<br>for promoting trust with their<br>provider                                                       | healthcare<br>providers                 | medical students (in<br>healthcare provider role)                                                                                                                                                                                               | English**       | 141 items                                                                                                                                                          | rating scale                                                                                                                                                                                                | other: cultural competency                                          | patient-centered care                   | clinical integration     | different study                               |
| 336. |                                                                        | Tucker, C. M. <sup>268</sup>      | 2007 | USA         | To assess cultural competency<br>of the health system                                                                                                                                                                                                          | patients                                | primary care patients                                                                                                                                                                                                                           | English**       | T-CUSHCI African American; 125 items                                                                                                                               | rating scale                                                                                                                                                                                                | patient-centered care                                               | patient-centered care                   | clinical integration     | different<br>versions in the<br>same study    |
| 337. |                                                                        | Tucker, C. M. <sup>268</sup>      | 2007 | USA         | To measure culturally<br>competency provided to non-<br>Hispanic white American<br>patient                                                                                                                                                                     | patients                                | primary care patients                                                                                                                                                                                                                           | English         | T-CUSHCI-non-Hispanic White<br>American; 134 (provider trust, provider<br>comfort, provider respect, office staff,<br>center policies and physical environment)    | rating scale                                                                                                                                                                                                | patient-centered care                                               | patient-centered care                   | clinical integration     | different<br>versions in the<br>same study    |
|      | (177)                                                                  |                                   |      |             |                                                                                                                                                                                                                                                                |                                         |                                                                                                                                                                                                                                                 |                 |                                                                                                                                                                    |                                                                                                                                                                                                             |                                                                     |                                         |                          |                                               |
| 338. | Unnamed 1                                                              | Adams, R. <sup>269</sup>          | 2012 | Australia   | To establish demographics and<br>explore three aspects of how<br>individuals perceive the doctor-<br>patient relationship in a<br>population sample                                                                                                            | patients and<br>healthcare<br>providers | chronic disease patients; To<br>qualify for the study, people<br>were only recruited if they<br>currently had a diagnosed<br>chronic condition and had an<br>established relationship in<br>managing this with their<br>primary care physician. | English         | 71 items                                                                                                                                                           | rating scale<br>a five-point scale ranging<br>through strongly agree, to<br>strongly disagree, were<br>used in addition to "don't<br>know" and "refused"; with<br>categorical response type of<br>questions | patient-centered care                                               | patient-centered care                   | clinical integration     |                                               |
|      | (178)                                                                  |                                   |      |             |                                                                                                                                                                                                                                                                |                                         |                                                                                                                                                                                                                                                 |                 |                                                                                                                                                                    |                                                                                                                                                                                                             |                                                                     |                                         |                          |                                               |
| 339. | Unnamed 12                                                             | McLaughlin, S. E. <sup>270</sup>  | 2008 | USA         | To assess transition process                                                                                                                                                                                                                                   | healthcare<br>providers                 | center directors, nurse<br>coordinators, care directors,<br>nurses, nutritionists,<br>respiratory therapists,                                                                                                                                   | English**       | 105 questions (3 close ended items on<br>demographics, 96 close ended grouped<br>within domains of transition services, 3<br>closed ended questions for subjective | rating scale                                                                                                                                                                                                | care continuity                                                     | care continuity /<br>comprehensive care | clinical integration     |                                               |

|      | Index Instrument<br>(209 index instruments;<br>379 validation studies) | Reference Study<br>(300 articles) | Year | Country            | Purpose of instrument                                                                                                                                              | Type of<br>respondent                 | Sample population                                                                                                                                                                     | Language          | Description of version, items, and<br>subscales                                                                                                                                                                                                                                                                                                                                                                     | Response options                  | Construct purported to measure                                                             | Construct classification            | Domain<br>classification                                             | Remarks                                |
|------|------------------------------------------------------------------------|-----------------------------------|------|--------------------|--------------------------------------------------------------------------------------------------------------------------------------------------------------------|---------------------------------------|---------------------------------------------------------------------------------------------------------------------------------------------------------------------------------------|-------------------|---------------------------------------------------------------------------------------------------------------------------------------------------------------------------------------------------------------------------------------------------------------------------------------------------------------------------------------------------------------------------------------------------------------------|-----------------------------------|--------------------------------------------------------------------------------------------|-------------------------------------|----------------------------------------------------------------------|----------------------------------------|
|      | (179)                                                                  |                                   |      |                    |                                                                                                                                                                    |                                       | clinicians and social workers                                                                                                                                                         |                   | reporting under mandate and financial impact of transition and 3 open-ended questioned for add info)                                                                                                                                                                                                                                                                                                                |                                   |                                                                                            |                                     |                                                                      |                                        |
| 340. | Unnamed 14                                                             | Nuno-Solinis, R. <sup>271</sup>   | 2013 | Spain              | To assess collaboration between clinical professionals from two different care levels (primary and specialized care), according to the clinicians' own perceptions | healthcare providers                  | primary care nurses, 31% primary care doctors (GP or pediatrician), 18.5% hospital specialists and 6% hospital nurses                                                                 | Spanish           | 10 items                                                                                                                                                                                                                                                                                                                                                                                                            | rating scale                      | care coordination (i.e., inter-professional collaboration between 2 different care levels) | care integration                    | professional integration                                             |                                        |
|      | (180)                                                                  |                                   |      |                    |                                                                                                                                                                    |                                       |                                                                                                                                                                                       |                   |                                                                                                                                                                                                                                                                                                                                                                                                                     |                                   |                                                                                            |                                     |                                                                      |                                        |
| 341. | Unnamed 15                                                             | Ouwens, M. <sup>272</sup>         | 2010 | Netherlands        | To assess the quality of patient-centered care                                                                                                                     | patients                              |                                                                                                                                                                                       | English**         | 56 indicators                                                                                                                                                                                                                                                                                                                                                                                                       | rating scale                      | patient-centered care                                                                      | patient-centered care               | clinical integration                                                 |                                        |
|      | (181)                                                                  |                                   |      |                    |                                                                                                                                                                    |                                       |                                                                                                                                                                                       |                   |                                                                                                                                                                                                                                                                                                                                                                                                                     |                                   |                                                                                            |                                     |                                                                      |                                        |
| 342. | Unnamed 16                                                             | Samele, C. <sup>273</sup>         | 2002 | UK                 | To assess patients' perceptions of their case managers                                                                                                             | patients                              | patients with severe psychosis                                                                                                                                                        | English           | 9 items                                                                                                                                                                                                                                                                                                                                                                                                             | rating scale                      | case management                                                                            | care coordination / case management | clinical integration                                                 |                                        |
|      | (182)                                                                  |                                   |      |                    |                                                                                                                                                                    |                                       |                                                                                                                                                                                       |                   |                                                                                                                                                                                                                                                                                                                                                                                                                     |                                   |                                                                                            |                                     |                                                                      |                                        |
| 343. | Unnamed 17                                                             | Shields, L. <sup>274</sup>        | 2004 | Australia          | To assess family centered care in various pediatric settings                                                                                                       | others: informal caregivers and staff | informal caregivers and staff                                                                                                                                                         | English           | 20 items (respect, collaboration, support)                                                                                                                                                                                                                                                                                                                                                                          | rating scale                      | patient-centered care                                                                      | patient-centered care               | clinical integration                                                 |                                        |
|      | (183)                                                                  |                                   |      |                    |                                                                                                                                                                    |                                       |                                                                                                                                                                                       |                   |                                                                                                                                                                                                                                                                                                                                                                                                                     |                                   |                                                                                            |                                     |                                                                      |                                        |
| 344. | Unnamed 18                                                             | Sidani, S. <sup>275</sup>         | 2008 | Canada             | To assess the extent to which ACNP encourage patients participation in care                                                                                        | patients                              | patients admitted into the acute care hospitals and assigned to the care of ACNPs                                                                                                     | English           | 5 items                                                                                                                                                                                                                                                                                                                                                                                                             | rating scale                      | patient-centered care                                                                      | patient-centered care               | clinical integration                                                 | different number of items and subscale |
|      | (184)                                                                  |                                   |      |                    |                                                                                                                                                                    |                                       |                                                                                                                                                                                       |                   |                                                                                                                                                                                                                                                                                                                                                                                                                     |                                   |                                                                                            |                                     |                                                                      |                                        |
| 345. | Unnamed 19                                                             | Sidani, S. <sup>275</sup>         | 2008 | Canada             | To assess the extent in which ACNPs attended to patients' needs and resolved their problems                                                                        | patients                              | patients admitted into the acute care hospitals and assigned to the care of ACNPs                                                                                                     | English           | 7 items (4 captured attendance to patients' physical and psychosocial needs and 3 items reflected resolution of the patients' health related problems during hospitalization and discharge)                                                                                                                                                                                                                         | rating scale                      | patient-centered care                                                                      | patient-centered care               | clinical integration                                                 | different number of items and subscale |
|      | (185)                                                                  |                                   |      |                    |                                                                                                                                                                    |                                       |                                                                                                                                                                                       |                   |                                                                                                                                                                                                                                                                                                                                                                                                                     |                                   |                                                                                            |                                     |                                                                      |                                        |
| 346. | Unnamed 20                                                             | Straten, G. F. <sup>276</sup>     | 2002 | Netherlands        | To measure the dimension of public trust in health care in Netherlands                                                                                             | others: members of the consumer panel | members of the consumer panel                                                                                                                                                         | Dutch             | Trust in the patient-focus of health care providers'. 'Trust in the expertise of health care providers' 'trust that policies at the macro-level will be without consequences for the patient', trust in the quality of care', trust in information supply and communication by care providers', 'trust in the quality of cooperation', trust in the availability of care, and trust in the time spent on patients'. | rating scale                      | other: public trust                                                                        | patient-centered care               | clinical integration                                                 |                                        |
|      | (186)                                                                  |                                   |      |                    |                                                                                                                                                                    |                                       |                                                                                                                                                                                       |                   |                                                                                                                                                                                                                                                                                                                                                                                                                     |                                   |                                                                                            |                                     |                                                                      |                                        |
| 347. | Unnamed 21                                                             | Uyei, J. <sup>277</sup>           | 2014 | South Africa       | To assess the delivery of TB, pre-art and art services in the clinic                                                                                               | healthcare providers                  | clinicians (doctors and nurses)                                                                                                                                                       | English           | 35 items                                                                                                                                                                                                                                                                                                                                                                                                            | rating scale                      | care integration                                                                           | care integration                    | combination (i.e., functional, organizational, clinical integration) |                                        |
|      | (187)                                                                  |                                   |      |                    |                                                                                                                                                                    |                                       |                                                                                                                                                                                       |                   |                                                                                                                                                                                                                                                                                                                                                                                                                     |                                   |                                                                                            |                                     |                                                                      |                                        |
| 348. | Unnamed 22                                                             | Van den Broeck, U. <sup>278</sup> | 2012 | Belgium            | To assess the quality of infertility care                                                                                                                          | patients                              | Patients who completed infertility diagnosis and at least one embryo transfer as a result of an assisted reproduction treatment or one intrauterine insemination (IUI) were eligible. | not reported      | 48 items; access, cost, humaneness or emotional support, competence, amount of information, communication between patients and doctors, waiting times, facilities and continuity and outcome of care                                                                                                                                                                                                                | rating scale                      | patient-centered care                                                                      | patient-centered care               | clinical integration                                                 |                                        |
|      | (188)                                                                  |                                   |      |                    |                                                                                                                                                                    |                                       |                                                                                                                                                                                       |                   |                                                                                                                                                                                                                                                                                                                                                                                                                     |                                   |                                                                                            |                                     |                                                                      |                                        |
| 349. | Unnamed 23                                                             | Wei, X. <sup>279</sup>            | 2008 | China              | To measure continuity of care in a community based diabetes control program in china                                                                               | patients                              | patients with diabetes                                                                                                                                                                | Chinese           | 36 items                                                                                                                                                                                                                                                                                                                                                                                                            | rating scale                      | care continuity                                                                            | care integration                    | clinical integration                                                 |                                        |
|      | (189)                                                                  |                                   |      |                    |                                                                                                                                                                    |                                       |                                                                                                                                                                                       |                   |                                                                                                                                                                                                                                                                                                                                                                                                                     |                                   |                                                                                            |                                     |                                                                      |                                        |
| 350. | Unnamed 24                                                             | Zineldin, M. <sup>280</sup>       | 2011 | Kazakhstan         | To measure the quality of care in the healthcare system in Kazakhstan                                                                                              | patients                              | inpatients in the hospitals                                                                                                                                                           | not reported      | 39 items                                                                                                                                                                                                                                                                                                                                                                                                            | not reported                      | other: quality of care                                                                     | care integration                    | combination (i.e., clinical, functional, system, integration)        |                                        |
|      | (190)                                                                  |                                   |      |                    |                                                                                                                                                                    |                                       |                                                                                                                                                                                       |                   |                                                                                                                                                                                                                                                                                                                                                                                                                     |                                   |                                                                                            |                                     |                                                                      |                                        |
| 351. | Unnamed 25                                                             | de Kok <sup>281</sup>             | 2007 | Netherlands        | To assess quality of care by patients operated on with breast cancer                                                                                               | patients                              | breast cancer patients                                                                                                                                                                | Dutch             | 55 items in 6 clusters                                                                                                                                                                                                                                                                                                                                                                                              | other concept mapping             | multiple constructs: patient centeredness and continuity of care                           | care integration                    | clinical integration                                                 |                                        |
|      | (191)                                                                  |                                   |      |                    |                                                                                                                                                                    |                                       |                                                                                                                                                                                       |                   |                                                                                                                                                                                                                                                                                                                                                                                                                     |                                   |                                                                                            |                                     |                                                                      |                                        |
| 352. | Unnamed 27                                                             | Grol <sup>282</sup>               | 1990 | Multiple Countries | To determine whether attitudes of physicians are patient-centered                                                                                                  | healthcare providers                  | validation study done in Dutch general practitioners [Note: details of comparative study not included]                                                                                | Dutch and English | not specified                                                                                                                                                                                                                                                                                                                                                                                                       | rating scale 5-point Likert scale | patient-centered care                                                                      | patient-centered care               | clinical integration                                                 |                                        |
|      | (192)                                                                  |                                   |      |                    |                                                                                                                                                                    |                                       |                                                                                                                                                                                       |                   |                                                                                                                                                                                                                                                                                                                                                                                                                     |                                   |                                                                                            |                                     |                                                                      |                                        |
| 353. | Unnamed 29                                                             | Kelly <sup>283</sup>              | 2005 | USA                | To measure patient trust in an emergency department                                                                                                                | patients                              | emergency department patients                                                                                                                                                         | English           | 18 of 42 potential items                                                                                                                                                                                                                                                                                                                                                                                            | rating scale 5-point scale        | other: trust                                                                               | patient-centered care               | clinical integration                                                 |                                        |

|      | Index Instrument<br>(209 index instruments;<br>379 validation studies) | Reference Study<br>(300 articles) | Year | Country                           | Purpose of instrument                                                                                                                                                                                          | Type of respondent                | Sample population                                                                                                                                                                                                    | Language  | Description of version, items, and subscales                                                                                                                                                                 | Response options                                                                                                                                                           | Construct purported to measure                                                                                                                                   | Construct classification             | Domain classification                                         | Remarks                       |
|------|------------------------------------------------------------------------|-----------------------------------|------|-----------------------------------|----------------------------------------------------------------------------------------------------------------------------------------------------------------------------------------------------------------|-----------------------------------|----------------------------------------------------------------------------------------------------------------------------------------------------------------------------------------------------------------------|-----------|--------------------------------------------------------------------------------------------------------------------------------------------------------------------------------------------------------------|----------------------------------------------------------------------------------------------------------------------------------------------------------------------------|------------------------------------------------------------------------------------------------------------------------------------------------------------------|--------------------------------------|---------------------------------------------------------------|-------------------------------|
|      | (193)                                                                  |                                   |      |                                   |                                                                                                                                                                                                                |                                   |                                                                                                                                                                                                                      |           |                                                                                                                                                                                                              |                                                                                                                                                                            |                                                                                                                                                                  |                                      |                                                               |                               |
| 354. | Unnamed 31                                                             | Leisen <sup>284</sup>             | 2001 | USA                               | To assess trust between physician and patients                                                                                                                                                                 | patients                          |                                                                                                                                                                                                                      | English   | 51 items                                                                                                                                                                                                     | rating scale                                                                                                                                                               | other: trust                                                                                                                                                     | patient-centered care                | clinical integration                                          |                               |
|      | (194)                                                                  |                                   |      |                                   |                                                                                                                                                                                                                |                                   |                                                                                                                                                                                                                      |           |                                                                                                                                                                                                              |                                                                                                                                                                            |                                                                                                                                                                  |                                      |                                                               |                               |
| 355. | Unnamed 32                                                             | Temkin-Greener <sup>285</sup>     | 2004 | USA                               | To measure interdisciplinary team processes and perceived effectiveness in a long term care setting                                                                                                            | healthcare providers              |                                                                                                                                                                                                                      | English   | 59 items                                                                                                                                                                                                     | rating scale                                                                                                                                                               | care coordination                                                                                                                                                | care coordination / case management  | professional integration                                      |                               |
|      | (195)                                                                  |                                   |      |                                   |                                                                                                                                                                                                                |                                   |                                                                                                                                                                                                                      |           |                                                                                                                                                                                                              |                                                                                                                                                                            |                                                                                                                                                                  |                                      |                                                               |                               |
| 356. | Unnamed 33                                                             | Little <sup>286</sup>             | 2001 | UK                                | To assess patients' perspectives of patient centered care                                                                                                                                                      | patients                          |                                                                                                                                                                                                                      | English   | 23 items                                                                                                                                                                                                     | rating scale                                                                                                                                                               | patient-centered care                                                                                                                                            | patient-centered care                | clinical integration                                          |                               |
|      | (196)                                                                  |                                   |      |                                   |                                                                                                                                                                                                                |                                   |                                                                                                                                                                                                                      |           |                                                                                                                                                                                                              |                                                                                                                                                                            |                                                                                                                                                                  |                                      |                                                               |                               |
| 357. | Unnamed 34                                                             | Thom <sup>287</sup>               | 2011 | USA                               | To measure physician trust in patients                                                                                                                                                                         | patients                          |                                                                                                                                                                                                                      | English   | 18 items                                                                                                                                                                                                     | rating scale                                                                                                                                                               | patient-centered care                                                                                                                                            | patient-centered care                | clinical integration                                          |                               |
|      | (197)                                                                  |                                   |      |                                   |                                                                                                                                                                                                                |                                   |                                                                                                                                                                                                                      |           |                                                                                                                                                                                                              |                                                                                                                                                                            |                                                                                                                                                                  |                                      |                                                               |                               |
| 358. | Unnamed 35                                                             | Wressle <sup>288</sup>            | 2008 | Sweden                            | A questionnaire for use in telephone interviews with relatives of patients discharged from geriatric wards to measure their perceptions of the quality of care                                                 | informal caregivers               | relatives of patients discharged from geriatric wards                                                                                                                                                                | Swedish** | 49 items (26 items final form)                                                                                                                                                                               | rating scale<br>5-point scale                                                                                                                                              | care integration (i.e., multiple constructs of quality of care)                                                                                                  | care integration                     | clinical integration                                          |                               |
|      | (198)                                                                  |                                   |      |                                   |                                                                                                                                                                                                                |                                   |                                                                                                                                                                                                                      |           |                                                                                                                                                                                                              |                                                                                                                                                                            |                                                                                                                                                                  |                                      |                                                               |                               |
| 359. | Unnamed 36                                                             | Young <sup>289</sup>              | 2011 | Australia                         | To measure patients' experience of cancer care coordination                                                                                                                                                    | patients                          | sample 1 - patients with a range of cancer types, treatment modalities and geographical location; sample 2 - patients with a newly diagnosed colorectal cancer who were participating in an ongoing randomized trial | English   | 40 items                                                                                                                                                                                                     | rating scale<br>5-point scale                                                                                                                                              | care coordination                                                                                                                                                | care coordination / case management  | clinical integration                                          |                               |
|      | (199)                                                                  |                                   |      |                                   |                                                                                                                                                                                                                |                                   |                                                                                                                                                                                                                      |           |                                                                                                                                                                                                              |                                                                                                                                                                            |                                                                                                                                                                  |                                      |                                                               |                               |
| 360. | Unnamed 37                                                             | Zhang <sup>290</sup>              | 2009 | Singapore                         | To measure patients' trust in pharmacists                                                                                                                                                                      | patients                          | English-speaking Singaporeans                                                                                                                                                                                        | English   | 18 items (reduced to 12 items): factors (benevolence, technical competence, global trust)                                                                                                                    | rating scale<br>5-point scale                                                                                                                                              | patient-centered care (i.e., trust in pharmacists)                                                                                                               | patient-centered care                | clinical integration                                          |                               |
|      | (200)                                                                  |                                   |      |                                   |                                                                                                                                                                                                                |                                   |                                                                                                                                                                                                                      |           |                                                                                                                                                                                                              |                                                                                                                                                                            |                                                                                                                                                                  |                                      |                                                               |                               |
| 361. | Unnamed 39                                                             | Saturno <sup>291</sup>            | 2015 | Spain                             | A quality monitoring tool                                                                                                                                                                                      | others: observers                 | observed cases Lot Quality Acceptance Sampling (LQAS) method and estimates of compliance                                                                                                                             | Spanish   | 22 indicators                                                                                                                                                                                                | other<br>direct observation                                                                                                                                                | patient-centered care                                                                                                                                            | patient-centered care                | clinical integration                                          |                               |
|      | (201)                                                                  |                                   |      |                                   |                                                                                                                                                                                                                |                                   |                                                                                                                                                                                                                      |           |                                                                                                                                                                                                              |                                                                                                                                                                            |                                                                                                                                                                  |                                      |                                                               |                               |
| 362. | Unnamed 4                                                              | Hiidenhovi, H. <sup>292</sup>     | 2001 | Finland                           | To assess service quality improvement needs in individual units and for making cross-departmental comparisons                                                                                                  | patients and healthcare providers | staff survey was included in the second stage to assess the second draft version of the questionnaire                                                                                                                | English   | Version 1 = 47 items (to ascertain the clarity and comprehensibility of the instrument's questions, to select a rating scale and to determine the best point in time for the survey)<br>Version 2 = 43 items | rating scale<br>pilot survey used 4 and 5-point scale and eventually changed to 6-point scale with 'cannot say' and 'irrelevant/no need at current visit' options included | patient-centered care (i.e., patient-oriented services)                                                                                                          | patient-centered care                | clinical integration                                          |                               |
|      | (202)                                                                  |                                   |      |                                   |                                                                                                                                                                                                                |                                   |                                                                                                                                                                                                                      |           |                                                                                                                                                                                                              |                                                                                                                                                                            |                                                                                                                                                                  |                                      |                                                               |                               |
| 363. | Unnamed 40                                                             | Haddad <sup>293</sup>             | 2000 | Canada                            | A scale for measuring patient perception of quality of care following a visit to a doctor                                                                                                                      | patients                          |                                                                                                                                                                                                                      | French    | 22 item validated scale                                                                                                                                                                                      | rating scale<br>5-point Likert scale                                                                                                                                       | patient-centered care<br>i.e., patient-physician relationship (five items); the technical aspects of care (12 items); and the outcomes of the visit (five items) | care integration                     | clinical integration                                          |                               |
|      | (203)                                                                  |                                   |      |                                   |                                                                                                                                                                                                                |                                   |                                                                                                                                                                                                                      |           |                                                                                                                                                                                                              |                                                                                                                                                                            |                                                                                                                                                                  |                                      |                                                               |                               |
| 364. | Unnamed 7                                                              | Lukas, C. V. <sup>294</sup>       | 2002 | USA                               | To measure the level of integration                                                                                                                                                                            | healthcare providers              |                                                                                                                                                                                                                      | English** | Not reported;11 domains                                                                                                                                                                                      | rating scale                                                                                                                                                               | care integration                                                                                                                                                 | care integration                     | combination (i.e., clinical, professional, system, normative) |                               |
|      | (204)                                                                  |                                   |      |                                   |                                                                                                                                                                                                                |                                   |                                                                                                                                                                                                                      |           |                                                                                                                                                                                                              |                                                                                                                                                                            |                                                                                                                                                                  |                                      |                                                               |                               |
| 365. | Unnamed 8                                                              | Masters, S. <sup>295</sup>        | 2010 | Australia                         | To measure patient experience of transition care                                                                                                                                                               | patients or patients (proxy)      | patients and proxy                                                                                                                                                                                                   | English** | 11 items                                                                                                                                                                                                     | rating scale                                                                                                                                                               | care continuity                                                                                                                                                  | care continuity / comprehensive care | clinical integration                                          |                               |
|      | (205)                                                                  |                                   |      |                                   |                                                                                                                                                                                                                |                                   |                                                                                                                                                                                                                      |           |                                                                                                                                                                                                              |                                                                                                                                                                            |                                                                                                                                                                  |                                      |                                                               |                               |
| 366. | Vanderbilt Therapeutic Alliance Scale (VTAS-R)                         | Shelef <sup>296</sup>             | 2008 | Israel                            | To assess physician and patient interaction                                                                                                                                                                    | patients                          |                                                                                                                                                                                                                      | English** | 5 items                                                                                                                                                                                                      | rating scale                                                                                                                                                               | other: therapeutic alliance                                                                                                                                      | patient-centered care                | clinical integration                                          | different type of respondents |
| 367. |                                                                        | Shelef <sup>296</sup>             | 2008 | Israel                            | To assess physician and patient interaction                                                                                                                                                                    | informal caregivers               |                                                                                                                                                                                                                      | English** | 5 items                                                                                                                                                                                                      | rating scale                                                                                                                                                               | other: therapeutic alliance                                                                                                                                      | patient-centered care                | clinical integration                                          | different type of respondents |
|      | (206)                                                                  |                                   |      |                                   |                                                                                                                                                                                                                |                                   |                                                                                                                                                                                                                      |           |                                                                                                                                                                                                              |                                                                                                                                                                            |                                                                                                                                                                  |                                      |                                                               |                               |
| 368. | Verona medical interview classification system (VR-MICS)               | Del Piccolo, L. <sup>297</sup>    | 2005 | Multiple Countries (UK and Italy) | To study interactions between general practitioners (GPs) and patients presenting with medical problems who may also be emotionally distressed, with the aim of helping GPs improve detection of such patients | others: observers                 | trained observers                                                                                                                                                                                                    | English   | Original version; 22-category coding system                                                                                                                                                                  | rating scale                                                                                                                                                               | patient-centered care                                                                                                                                            | patient-centered care                | clinical integration                                          | different versions            |



|      | Index Instrument (209 index instruments; 379 validation studies) | Reference Study (300 articles) | Year | Country                           | Purpose of instrument                                                                                                                                                                                          | Type of respondent | Sample population                                                                                                   | Language           | Description of version, items, and subscales     | Response options                                                                                                             | Construct purported to measure                          | Construct classification | Domain classification                               | Remarks                              |
|------|------------------------------------------------------------------|--------------------------------|------|-----------------------------------|----------------------------------------------------------------------------------------------------------------------------------------------------------------------------------------------------------------|--------------------|---------------------------------------------------------------------------------------------------------------------|--------------------|--------------------------------------------------|------------------------------------------------------------------------------------------------------------------------------|---------------------------------------------------------|--------------------------|-----------------------------------------------------|--------------------------------------|
| 369. |                                                                  | Del Piccolo, L. <sup>297</sup> | 2005 | Multiple Countries (UK and Italy) | To study interactions between general practitioners (GPS) and patients presenting with medical problems who may also be emotionally distressed, with the aim of helping GPS improve detection of such patients | others: observers  | trained observers                                                                                                   | English            | Patient version; 22-category coding system       | rating scale                                                                                                                 | patient-centered care                                   | patient-centered care    | clinical integration                                | different versions                   |
| 370. |                                                                  | Del Piccolo, L. <sup>297</sup> | 2005 | Multiple Countries (UK and Italy) | To study interactions between general practitioners (GPS) and patients presenting with medical problems who may also be emotionally distressed, with the aim of helping GPS improve detection of such patients | others: observers  | trained observers                                                                                                   | English            | Doctor version; 22-category coding system        | rating scale                                                                                                                 | patient-centered care                                   | patient-centered care    | clinical integration                                | different versions                   |
|      | (207)                                                            |                                |      |                                   |                                                                                                                                                                                                                |                    |                                                                                                                     |                    |                                                  |                                                                                                                              |                                                         |                          |                                                     |                                      |
| 371. | Veterans Affairs Outpatient Community Services                   | Haggerty <sup>70</sup>         | 2011 | Canada                            | Mapped attributes: overall coordination of care, specialty provider access                                                                                                                                     | patients           |                                                                                                                     | French and English | 10 items on management continuity [coordination] | rating scale 0 to 6 scale                                                                                                    | multiple constructs: care continuity, care coordination | care integration         | combination (i.e., professional and organizational) | different response scales            |
| 372. |                                                                  | Haggerty <sup>44</sup>         | 2011 | Canada                            | To measure overall coordination and specialty access subscales                                                                                                                                                 | patients           | healthcare users                                                                                                    | French and English | 4 items                                          | dichotomous scale Likert-type with dichotomous ratings                                                                       | care coordination                                       | care integration         | organizational integration                          | different response scales            |
|      | (208)                                                            |                                |      |                                   |                                                                                                                                                                                                                |                    |                                                                                                                     |                    |                                                  |                                                                                                                              |                                                         |                          |                                                     |                                      |
| 373. | Wake Forest Physician Trust Scale                                | Bachinger <sup>298</sup>       | 2009 | Netherlands                       | To measure patients' trust in their physician                                                                                                                                                                  | patients           | outpatients                                                                                                         | Dutch              | 10 items                                         | rating scale 5-point-Likert scale ('totally agree' = 1, to 'totally disagree' = 5)                                           | other: trust                                            | patient-centered care    | clinical integration                                | different study                      |
| 374. |                                                                  | Hall <sup>299</sup>            | 2002 | USA                               | To measure trust in physicians                                                                                                                                                                                 | patients           | health insurance pays for medical costs seen by doctor or health professional; random national sample               | English            | 10 item unidimensional scale                     | rating scale Likert-type categories: strongly agree (SA), agree (A), neutral (N), disagree (DA), and strongly disagree (SDA) | other: trust                                            | patient-centered care    | clinical integration                                | different samples in the same study  |
| 375. |                                                                  | Hall <sup>299</sup>            | 2002 | USA                               | To measure trust in physicians                                                                                                                                                                                 | patients           | health insurance pays for medical costs seen by doctor or health professional; random regional sample (from an HMO) | English            | 10 item unidimensional scale                     | rating scale Likert-type categories: strongly agree (SA), agree (A), neutral (N), disagree (DA), and strongly disagree (SDA) | other: trust                                            | patient-centered care    | clinical integration                                | different samples in the same study  |
|      | (209)                                                            |                                |      |                                   |                                                                                                                                                                                                                |                    |                                                                                                                     |                    |                                                  |                                                                                                                              |                                                         |                          |                                                     |                                      |
| 376. | Working Alliance Inventory (WAI)                                 | Bale <sup>111</sup>            | 2006 | UK                                | To measure the therapeutic alliance mostly within the context of psychotherapy                                                                                                                                 | patients           | patients who had been cared for by the team for more than three months                                              | English            | 36 items                                         | rating scale 7-point Likert scale                                                                                            | care coordination (i.e., therapeutic alliance)          | patient-centered care    | professional integration                            | different study                      |
| 377. |                                                                  | Hatcher <sup>300</sup>         | 2006 | USA                               | To assess the alliance in psychotherapy                                                                                                                                                                        | patients           | outpatient facilities and psychotherapy clinic                                                                      | English            | 36 items                                         | rating scale 7-point scale                                                                                                   | patient-centered care                                   | patient-centered care    | clinical integration                                | different sample and number of items |
| 378. |                                                                  | Hatcher <sup>300</sup>         | 2006 | USA                               | To assess the alliance in psychotherapy                                                                                                                                                                        | patients           | outpatient facilities and psychotherapy clinic                                                                      | English            | 12 items                                         | rating scale 7-point scale                                                                                                   | patient-centered care                                   | patient-centered care    | clinical integration                                | different sample and number of items |
| 379. |                                                                  | Hatcher <sup>300</sup>         | 2006 | USA                               | To assess the alliance in psychotherapy                                                                                                                                                                        | patients           | outpatient facilities and psychotherapy clinic                                                                      | English            | 12 items (alternative)                           | rating scale 7-point scale                                                                                                   | patient-centered care                                   | patient-centered care    | clinical integration                                | different sample and number of items |

\* Index instruments are the main instruments validated in studies included in the review; other instruments used as gold standard for criterion validity or comparators to test convergent/divergent validity are not presented in the summary

\*\* Assumed when not specified in the paper

^ described other instruments but only tested for the main instrument measuring inter-organizational linkages in general practice (GCP-LI); no psychometric properties for the other 3 tools (which were used to validate the GCP-LI)

^^ described other instruments but analysis was only performed using the combined items in the Process and Outcome index tools

Boldface: Example of different studies measuring different constructs using the same instrument

## References

- Misdrahi D, Verdoux H, Lancon C, Bayle F. The 4-Point ordinal Alliance Self-report: a self-report questionnaire for assessing therapeutic relationships in routine mental health. *Comprehensive psychiatry*. Mar-Apr 2009;50(2):181-185.
- Agnew-Davies R, Stiles WB, Hardy GE, Barkham M, Shapiro DA. Alliance structure assessed by the Agnew Relationship Measure (ARM). *The British journal of clinical psychology / the British Psychological Society*. May 1998;37 ( Pt 2):155-172.
- Stiles WB, Agnew-Davies R, Barkham M, et al. Convergent validity of the Agnew Relationship Measure and the Working Alliance Inventory. *Psychological assessment*. Jun 2002;14(2):209-220.
- Durbin J, Goering P, Streiner DL, Pink G. Continuity of care: validation of a new self-report measure for individuals using mental health services. *The journal of behavioral health services & research*. Jul-Sep 2004;31(3):279-296.
- Joyce AS, Adair CE, Wild TC, et al. Continuity of care: validation of a self-report measure to assess client perceptions of mental health service delivery. *Community mental health journal*. Apr 2010;46(2):192-208.
- Safran DG, Karp M, Coltin K, et al. Measuring patients' experiences with individual primary care physicians. Results of a statewide demonstration project. *Journal of general internal medicine*. Jan 2006;21(1):13-21.
- Wholey DR, Zhu X, Knoke D, Shah P, Zellmer-Bruhn M, Witheridge TF. The teamwork in assertive community treatment (TACT) scale: development and validation. *Psychiatric services (Washington, D.C.)*. Nov 2012;63(11):1108-1117.
- Bonomi AE, Wagner EH, Glasgow RE, VonKorff M. Assessment of chronic illness care (ACIC): a practical tool to measure quality improvement. *Health services research*. Jun 2002;37(3):791-820.
- Cramm JM, Strating MM, Tsiachristas A, Nieboer AP. Development and validation of a short version of the Assessment of Chronic Illness Care (ACIC) in Dutch disease management programs. *Health and quality of life outcomes*. 2011;9:49.
- Sullivan JL, Meterko M, Baker E, et al. Reliability and validity of a person-centered care staff survey in veterans health administration community living centers. *The Gerontologist*. Aug 2013;53(4):596-607.
- Barkham M, Agnew RM, Culverwell A. The California Psychotherapy Alliance Scales: a pilot study of dimensions and elements. *The British journal of medical psychology*. Jun 1993;66 ( Pt 2):157-165.
- Gaston L. Reliability and criterion-related validity of the California Psychotherapy Alliance Scales—patient version. *Psychological Assessment: A Journal of Consulting and Clinical Psychology*. 1991;3(1):68-74.
- Dobrow MJ, Paszat L, Golden B, et al. Measuring Integration of Cancer Services to Support Performance Improvement: The CSI Survey. *Healthcare policy = Politiques de sante*. Aug 2009;5(1):35-53.
- Bull MJ, Luo D, Maruyama GM. Measuring continuity of elders' posthospital care. *Journal of nursing measurement*. Summer 2000;8(1):41-60.
- Seys D, Deneckere S, Sermeus W, et al. The Care Process Self-Evaluation Tool: a valid and reliable instrument for measuring care process organization of health care teams. *BMC health services research*. 2013;13:325.



16. Vanhaecht K, De Witte K, Depreitere R, et al. Development and validation of a care process self-evaluation tool. *Health services management research : an official journal of the Association of University Programs in Health Administration / HSMC, AUPHA*. Aug 2007;20(3):189-202.
17. Bakshi AB, Wee SL, Tay C, et al. Validation of the care transition measure in multi-ethnic South-East Asia in Singapore. *BMC health services research*. 2012;12:256.
18. Parry C, Mahoney E, Chalmers SA, Coleman EA. Assessing the quality of transitional care: further applications of the care transitions measure. *Medical care*. Mar 2008;46(3):317-322.
19. Coleman EA, Mahoney E, Parry C. Assessing the quality of preparation for posthospital care from the patient's perspective: the care transitions measure. *Medical care*. Mar 2005;43(3):246-255.
20. Coleman EA, Smith JD, Frank JC, Eilertsen TB, Thiare JN, Kramer AM. Development and testing of a measure designed to assess the quality of care transitions. *International journal of integrated care*. 2002;2:e02.
21. Shadmi E, Zisberg A, Coleman EA. Translation and validation of the Care Transition Measure into Hebrew and Arabic. *International journal for quality in health care : journal of the International Society for Quality in Health Care / ISQua*. Apr 2009;21(2):97-102.
22. Cramm JM, Strating MM, Nieboer AP. Validation of the caregivers' satisfaction with Stroke Care Questionnaire: C-SASC hospital scale. *Journal of neurology*. Jun 2011;258(6):1008-1012.
23. Gaugler JE, Hobday JV, Savik K. The CARES((R)) Observational Tool: a valid and reliable instrument to assess person-centered dementia care. *Geriatric nursing (New York, N.Y.)*. May-Jun 2013;34(3):194-198.
24. Bakker FC, Persoon A, Schoon Y, Marcel G, Rikkert O. The carewell in hospital questionnaire: A measure of frail elderly inpatient experiences with individualized and integrated hospital care. *Journal of hospital medicine : an official publication of the Society of Hospital Medicine*. May 2014;9(5):324-329.
25. Duffy JR, Brewer BB, Weaver MT. Revision and psychometric properties of the caring assessment tool. *Clinical nursing research*. Feb 2014;23(1):80-93.
26. Duffy JR, Hoskins L, Seifert RF. Dimensions of caring: psychometric evaluation of the caring assessment tool. *ANS. Advances in nursing science*. Jul-Sep 2007;30(3):235-245.
27. Hadjistavropoulos HD, Sagan M, Bierlein C, Lawson K. Development of a case management quality questionnaire. *Care management journals : Journal of case management ; The journal of long term home health care*. Spring 2003;4(1):8-17.
28. McGuiness C, Sibthorpe B. Development and initial validation of a measure of coordination of health care. *International journal for quality in health care : journal of the International Society for Quality in Health Care / ISQua*. Aug 2003;15(4):309-318.
29. de Witte L, Schoot T, Proot I. Development of the client-centred care questionnaire. *Journal of advanced nursing*. Oct 2006;56(1):62-68.
30. Cott CA, Teare G, McGilton KS, Lineker S. Reliability and construct validity of the client-centred rehabilitation questionnaire. *Disability and rehabilitation*. Nov 30 2006;28(22):1387-1397.
31. Briner M, Kessler O, Pfeiffer Y, Wehner T, Manser T. Assessing hospitals' clinical risk management: Development of a monitoring instrument. *BMC health services research*. 2010;10:337.
32. Hibbard JH, Collins PA, Mahoney E, Baker LH. The development and testing of a measure assessing clinician beliefs about patient self-management. *Health expectations : an international journal of public participation in health care and health policy*. Mar 2010;13(1):65-72.
33. Barr PJ, Thompson R, Walsh T, Grande SW, Ozanne EM, Elwyn G. The psychometric properties of CollaboRATE: a fast and frugal patient-reported measure of the shared decision-making process. *Journal of medical Internet research*. 2014;16(1):e2.
34. Elwyn G, Barr PJ, Grande SW, Thompson R, Walsh T, Ozanne EM. Developing CollaboRATE: a fast and frugal patient-reported measure of shared decision making in clinical encounters. *Patient education and counseling*. Oct 2013;93(1):102-107.
35. Baggs JG. Development of an instrument to measure collaboration and satisfaction about care decisions. *Journal of advanced nursing*. Jul 1994;20(1):176-182.
36. Winning TA, Kinnell A, Wener ME, Mazurat N, D JS. Validity of scores from communication skills instruments for patients and their dental student-clinicians. *European journal of dental education : official journal of the Association for Dental Education in Europe*. May 2013;17(2):93-100.
37. Schonwetter DJ, Wener ME, Mazurat N. Determining the validity and reliability of clinical communication assessment tools for dental patients and students. *Journal of dental education*. Oct 2012;76(10):1276-1290.
38. Wener ME, Schonwetter DJ, Mazurat N. Developing new dental communication skills assessment tools by including patients and other stakeholders. *Journal of dental education*. Dec 2011;75(12):1527-1541.
39. Beaulieu MD, Haggerty JL, Beaulieu C, et al. Interpersonal communication from the patient perspective: comparison of primary healthcare evaluation instruments. *Healthcare policy = Politiques de sante*. Dec 2011;7(Spec Issue):108-123.
40. Flocke SA. Measuring attributes of primary care: development of a new instrument. *The Journal of family practice*. Jul 1997;45(1):64-74.
41. Haggerty JL, Beaulieu MD, Pineault R, et al. Comprehensiveness of care from the patient perspective: comparison of primary healthcare evaluation instruments. *Healthcare policy = Politiques de sante*. Dec 2011;7(Spec Issue):154-166.
42. Burge F, Haggerty JL, Pineault R, et al. Relational continuity from the patient perspective: comparison of primary healthcare evaluation instruments. *Healthcare policy = Politiques de sante*. Dec 2011;7(Spec Issue):124-138.
43. Haggerty JL, Burge F, Beaulieu MD, et al. Validation of instruments to evaluate primary healthcare from the patient perspective: overview of the method. *Healthcare policy = Politiques de sante*. Dec 2011;7(Spec Issue):31-46.
44. Haggerty JL, Burge F, Pineault R, et al. Management continuity from the patient perspective: comparison of primary healthcare evaluation instruments. *Healthcare policy = Politiques de sante*. Dec 2011;7(Spec Issue):139-153.
45. Chavez LM, Canino G, Shrout PE, Barrio C, Ware NC. Psychometric evaluation of the Spanish version of CONNECT: a measure of continuity of care in mental health services. *International journal of methods in psychiatric research*. 2007;16(1):23-33.
46. Ware NC, Dickey B, Tugenberg T, McHorney CA. CONNECT: a measure of continuity of care in mental health services. *Mental health services research*. Dec 2003;5(4):209-221.
47. Fung CS, Hua A, Tam L, Mercer SW. Reliability and validity of the Chinese version of the CARE Measure in a primary care setting in Hong Kong. *Family practice*. Oct 2009;26(5):398-406.
48. Mercer SW, Maxwell M, Heaney D, Watt GC. The consultation and relational empathy (CARE) measure: development and preliminary validation and reliability of an empathy-based consultation process measure. *Family practice*. Dec 2004;21(6):699-705.
49. Mercer SW, Murphy DJ. Validity and reliability of the CARE Measure in secondary care. *Clinical Governance: An International Journal*. 2008;13(4):269-283.
50. Mercer SW, Neumann M, Wirtz M, Fitzpatrick B, Vojt G. General practitioner empathy, patient enablement, and patient-reported outcomes in primary care in an area of high socio-economic deprivation in Scotland--a pilot prospective study using structural equation modeling. *Patient education and counseling*. Nov 2008;73(2):240-245.
51. Mercer SW HD, Murray A, Murphy DJ, Eva HW. . Capturing patients' views on communication with anaesthetists: the CARE Measure. . *Clin Gov Int J*. 2008;13:128-137.
52. Eisen SV, Shaul JA, Leff HS, Stringfellow V, Clarridge BR, Cleary PD. Toward a national consumer survey: evaluation of the CABHS and MHSIP instruments. *The journal of behavioral health services & research*. Aug 2001;28(3):347-369.
53. Scholle SH, Vuong O, Ding L, et al. Development of and field test results for the CAHPS PCMH Survey. *Medical care*. Nov 2012;50 Suppl:S2-10.
54. Arah OA, ten Asbroek AH, Delnoij DM, et al. Psychometric properties of the Dutch version of the Hospital-level Consumer Assessment of Health Plans Survey instrument. *Health services research*. Feb 2006;41(1):284-301.
55. Gallagher P, Ding L, Ham HP, Schor EL, Hays RD, Cleary PD. Development of a new patient-based measure of pediatric ambulatory care. *Pediatrics*. Nov 2009;124(5):1348-1354.
56. Hargraves JL, Hays RD, Cleary PD. Psychometric properties of the Consumer Assessment of Health Plans Study (CAHPS) 2.0 adult core survey. *Health services research*. Dec 2003;38(6 Pt 1):1509-1527.
57. Hays RD, Shaul JA, Williams VS, et al. Psychometric properties of the CAHPS 1.0 survey measures. Consumer Assessment of Health Plans Study. *Medical care*. Mar 1999;37(3 Suppl):Ms22-31.
58. Solomon LS, Hays RD, Zaslavsky AM, Ding L, Cleary PD. Psychometric properties of a group-level Consumer Assessment of Health Plans Study (CAHPS) instrument. *Medical care*. Jan 2005;43(1):53-60.
59. Clark C, Young MS, Jackson E, et al. Consumer perceptions of integrated trauma-informed services among women with co-occurring disorders. *The journal of behavioral health services & research*. Jan 2008;35(1):71-90.
60. Berendsen AJ, Groenier KH, de Jong GM, et al. Assessment of patient's experiences across the interface between primary and secondary care: Consumer Quality Index Continuum of care. *Patient education and counseling*. Oct 2009;77(1):123-127.
61. Booi JC, Zegers M, Evers PM, Hendriks M, Delnoij DM, Rademakers JJ. Improving cancer patient care: development of a generic cancer consumer quality index questionnaire for cancer patients. *BMC cancer*. 2013;13:203.
62. Damman OC, Hendriks M, Sixma HJ. Towards more patient centred healthcare: A new Consumer Quality Index instrument to assess patients' experiences with breast care. *European journal of cancer (Oxford, England : 1990)*. Jun 2009;45(9):1569-1577.
63. Howie JG, Heaney DJ, Maxwell M, Walker JJ, Freeman GK. Developing a 'consultation quality index' (CQI) for use in general practice. *Family practice*. Dec 2000;17(6):455-461.
64. Stubbe JH, Brouwer W, Delnoij DM. Patients' experiences with quality of hospital care: the Consumer Quality Index Cataract Questionnaire. *BMC ophthalmology*. 2007;7:14.
65. Stubbe JH, Gelsema T, Delnoij DM. The Consumer Quality Index Hip Knee Questionnaire measuring patients' experiences with quality of care after a total hip or knee arthroplasty. *BMC health services research*. 2007;7:60.
66. Triemstra M, Winters S, Kool RB, Wiegers TA. Measuring client experiences in long-term care in the Netherlands: a pilot study with the Consumer Quality Index Long-term Care. *BMC health services research*. 2010;10:95.
67. Rose D, Sweeney A, Leese M, et al. Developing a user-generated measure of continuity of care: brief report. *Acta psychiatrica Scandinavica*. Apr 2009;119(4):320-324.
68. Sweeney A, Rose D, Clement S, et al. Understanding service user-defined continuity of care and its relationship to health and social measures: a cross-sectional study. *BMC health services research*. 2012;12:145.
69. Tobon JI, Reid GJ, Goffin RD. Continuity of Care in Children's Mental Health: Development of a Measure. *Administration and policy in mental health*. Sep 28 2013.
70. Haggerty JL, Roberge D, Freeman GK, Beaulieu C, Breton M. Validation of a generic measure of continuity of care: when patients encounter several clinicians. *Annals of family medicine*. Sep-Oct 2012;10(5):443-451.
71. Schaefer JA, Cronkite R, Ingudomnukul E. Assessing continuity of care practices in substance use disorder treatment programs. *Journal of studies on alcohol*. Jul 2004;65(4):513-520.
72. Block M, Ehrenworth JF, Cuce VM, et al. Measuring handoff quality in labor and delivery: development, validation, and application of the Coordination of Handoff Effectiveness Questionnaire (CHEQ). *Joint Commission journal on quality and patient safety / Joint Commission Resources*. May 2013;39(5):213-220.
73. Wenghofer EF, Williams AP, Klass DJ, Faulkner D. Physician-patient encounters: the structure of performance in family and general office practice. *The Journal of continuing education in the health professions*. Fall 2006;26(4):285-293.
74. Aller MB, Vargas I, Garcia-Subirats I, et al. A tool for assessing continuity of care across care levels: an extended psychometric validation of the CCAENA questionnaire. *International journal of integrated care*. 2013;13:e050.
75. Doorenbos AZ, Schim SM, Benkert R, Borse NN. Psychometric evaluation of the cultural competence assessment instrument among healthcare providers. *Nursing research*. Sep-Oct 2005;54(5):324-331.
76. Ahgren B, Axelsson SB, Axelsson R. Evaluating intersectoral collaboration: a model for assessment by service users. *International journal of integrated care*. 2009;9:e03.
77. Dolovich LR, Nair KM, Ciliska DK, et al. The Diabetes Continuity of Care Scale: the development and initial evaluation of a questionnaire that measures continuity of care from the patient perspective. *Health & social care in the community*. Nov 2004;12(6):475-487.
78. Katapodi MC, Pierce PF, Facione NC. Distrust, predisposition to use health services and breast cancer screening: results from a multicultural community-based survey. *International journal of nursing studies*. Aug 2010;47(8):975-983.
79. de Monchy C, Richardson R, Brown RA, Harden RM. Measuring attitudes of doctors: the doctor-patient (DP) rating. *Medical education*. May 1988;22(3):231-239.
80. McGovern MP, Urada D, Lambert-Harris C, Sullivan ST, Mazade NA. Development and initial feasibility of an organizational measure of behavioral health integration in medical care settings. *Journal of substance abuse treatment*. Dec 2012;43(4):402-409.

81. Wilkerson L, Fung CC, May W, Elliott D. Assessing patient-centered care: one approach to health disparities education. *Journal of general internal medicine*. May 2010;25 Suppl 2:S86-90.
82. Dancet EA, Ameye L, Sermeus W, et al. The ENDOCARE questionnaire (ECQ): a valid and reliable instrument to measure the patient-centeredness of endometriosis care in Europe. *Human reproduction (Oxford, England)*. Nov 2011;26(11):2988-2999.
83. Haggerty JL, Levesque JF, Santor DA, et al. Accessibility from the patient perspective: comparison of primary healthcare evaluation instruments. *Healthcare policy = Politiques de sante*. Dec 2011;7(Spec Issue):94-107.
84. Gulliford MC, Naithani S, Morgan M. Measuring continuity of care in diabetes mellitus: an experience-based measure. *Annals of family medicine*. Nov-Dec 2006;4(6):548-555.
85. Martin LR, DiMatteo MR, Lepper HS. Facilitation of patient involvement in care: development and validation of a scale. *Behavioral medicine (Washington, D.C.)*. Fall 2001;27(3):111-120.
86. Casarett D, Pickard A, Bailey FA, et al. A nationwide VA palliative care quality measure: the family assessment of treatment at the end of life. *Journal of palliative medicine*. Jan-Feb 2008;11(1):68-75.
87. Reid RC, Chappell NL, Gish JA. Measuring family perceived involvement in individualized long-term care. *Dementia*. February 1, 2007 2007;6(1):89-104.
88. Clayton MF, Latimer S, Dunn TW, Haas L. Assessing patient-centered communication in a family practice setting: how do we measure it, and whose opinion matters? *Patient education and counseling*. Sep 2011;84(3):294-302.
89. Krupat E, Frankel R, Stein T, Irish J. The Four Habits Coding Scheme: validation of an instrument to assess clinicians' communication behavior. *Patient education and counseling*. Jul 2006;62(1):38-45.
90. Jaturapatporn D, Hathirat S, Manataweewat B, et al. Reliability and validity of a Thai version of the General Practice Assessment Questionnaire (GPAQ). *Journal of the Medical Association of Thailand = Chotmaihet thangphaet*. Sep 2006;89(9):1491-1496.
91. Mead N, Bower P, Roland M. The General Practice Assessment Questionnaire (GPAQ) - development and psychometric characteristics. *BMC family practice*. 2008;9:13.
92. Zwier G. A standardised and validated patient survey in primary care: introducing the New Zealand General Practice Assessment Questionnaire (NZGPAQ). *The New Zealand medical journal*. Apr 5 2013;126(1372):47-54.
93. Jayasinghe UW, Proudfoot J, Holton C, et al. Chronically ill Australians' satisfaction with accessibility and patient-centredness. *International journal for quality in health care : journal of the International Society for Quality in Health Care / ISQua*. Apr 2008;20(2):105-114.
94. Ramsay J, Campbell JL, Schroter S, Green J, Roland M. The General Practice Assessment Survey (GPAS): tests of data quality and measurement properties. *Family practice*. Oct 2000;17(5):372-379.
95. Bower P, Mead N, Roland M. What dimensions underlie patient responses to the General Practice Assessment Survey? A factor analytic study. *Family practice*. Oct 2002;19(5):489-495.
96. Amoroso C, Proudfoot J, Bubner T, et al. Validation of an instrument to measure inter-organisational linkages in general practice. *International journal of integrated care*. 2007;7:e46.
97. Lyratzopoulos G, Elliott MN, Barbiere JM, et al. How can health care organizations be reliably compared?: Lessons from a national survey of patient experience. *Medical care*. Aug 2011;49(8):724-733.
98. Kim H, Capezuti E, Boltz M, Fairchild S, Fulmer T, Mezey M. Factor structure of the geriatric care environment scale. *Nursing research*. Sep-Oct 2007;56(5):339-347.
99. Paulo de Almeida Tavares J, Leite da Silva A, Sa-Couto P, Boltz M, Capezuti E. Validation of geriatric care environment scale in portuguese nurses. *Current gerontology and geriatrics research*. 2013;2013:426596.
100. Gan C, Campbell KA, Snider A, Cohen S, Hubbard J. Giving Youth a Voice (GYV): a measure of youths' perceptions of the client-centredness of rehabilitation services. *Canadian journal of occupational therapy. Revue canadienne d'ergotherapie*. Apr 2008;75(2):96-104.
101. Thompson HS, Valdimarsdottir HB, Winkel G, Jandorf L, Redd W. The Group-Based Medical Mistrust Scale: psychometric properties and association with breast cancer screening. *Preventive medicine*. Feb 2004;38(2):209-218.
102. Horwitz LI, Dombroski J, Murphy TE, Farnan JM, Johnson JK, Arora VM. Validation of a handoff assessment tool: the Handoff CEX. *Journal of clinical nursing*. May 2013;22(9-10):1477-1486.
103. Horwitz LI, Rand D, Staisiunas P, et al. Development of a handoff evaluation tool for shift-to-shift physician handoffs: the Handoff CEX. *Journal of hospital medicine : an official publication of the Society of Hospital Medicine*. Apr 2013;8(4):191-200.
104. Pezzolesi C, Manser T, Schifano F, et al. Human factors in clinical handover: development and testing of a 'handover performance tool' for doctors' shift handovers. *International journal for quality in health care : journal of the International Society for Quality in Health Care / ISQua*. Feb 2013;25(1):58-65.
105. Fiscella K, Franks P, Srinivasan M, Kravitz RL, Epstein R. Ratings of physician communication by real and standardized patients. *Annals of family medicine*. Mar-Apr 2007;5(2):151-158.
106. Gremigni P, Sommaruga M, Peltenburg M. Validation of the Health Care Communication Questionnaire (HCCQ) to measure outpatients' experience of communication with hospital staff. *Patient education and counseling*. Apr 2008;71(1):57-64.
107. Bova C, Fennie KP, Watrous E, Dieckhaus K, Williams AB. The health care relationship (HCR) trust scale: development and psychometric evaluation. *Research in nursing & health*. Oct 2006;29(5):477-488.
108. Rose A, Peters N, Shea JA, Armstrong K. Development and testing of the health care system distrust scale. *Journal of general internal medicine*. Jan 2004;19(1):57-63.
109. Hadjistavropoulos HD, Biem HJ, Kowalyk KM. Measurement of continuity of care in cardiac patients: reliability and validity of an in-person questionnaire. *The Canadian journal of cardiology*. Jul 2004;20(9):883-891.
110. Kowalyk KM, Hadjistavropoulos HD, Biem HJ. Measuring continuity of care for cardiac patients: development of a patient self-report questionnaire. *The Canadian journal of cardiology*. Feb 2004;20(2):205-212.
111. Bale R, Catty J, Watt H, Greenwood N, Burns T. Measures of the therapeutic relationship in severe psychotic illness: a comparison of two scales. *The International journal of social psychiatry*. May 2006;52(3):256-266.
112. De Weert-Van Oene GH, De Jong CA, Jorg F, Schrijvers GJ. The Helping Alliance Questionnaire: psychometric properties in patients with substance dependence. *Substance use & misuse*. Sep 1999;34(11):1549-1569.
113. Nie Y, Mao X, Cui H, He S, Li J, Zhang M. Hospital survey on patient safety culture in China. *BMC health services research*. 2013;13:228.
114. Browne G, Roberts J, Gafni A, Byrne C, Kertyzia J, Loney P. Conceptualizing and validating the human services integration measure. *International journal of integrated care*. 2004;4:e03.
115. Burns T, Catty J, White S, et al. Continuity of care in mental health: understanding and measuring a complex phenomenon. *Psychological medicine*. Feb 2009;39(2):313-323.
116. Batterham R, Southern D, Appleby N, et al. Construction of a GP integration model. *Social science & medicine (1982)*. Apr 2002;54(8):1225-1241.
117. Charalambous A, Chappell NL, Katajisto J, Suhonen R. The conceptualization and measurement of individualized care. *Geriatric nursing (New York, N.Y.)*. Jan-Feb 2012;33(1):17-27.
118. O'Rourke N, Chappell NL, Caspar S. Measurement and analysis of individualized care inventory responses comparing long-term care nurses and care aides. *The Gerontologist*. Dec 2009;49(6):839-846.
119. Petroz U, Kennedy D, Webster F, Nowak A. Patients' perceptions of individualized care: evaluating psychometric properties and results of the individualized care scale. *The Canadian journal of nursing research = Revue canadienne de recherche en sciences infirmieres*. Jun 2011;43(2):80-100.
120. Suhonen R, Gustafsson ML, Katajisto J, Valimaki M, Leino-Kilpi H. Individualized care scale - nurse version: a Finnish validation study. *Journal of evaluation in clinical practice*. Feb 2010;16(1):145-154.
121. Suhonen R, Valimaki M, Katajisto J. Developing and testing an instrument for the measurement of individual care. *Journal of advanced nursing*. Nov 2000;32(5):1253-1263.
122. Suhonen R, Berg A, Idvall E, et al. Adapting the Individualized Care Scale for cross-cultural comparison. *Scandinavian journal of caring sciences*. Jun 2010;24(2):392-403.
123. Blais MA. Development of an inpatient treatment alliance scale. *The Journal of nervous and mental disease*. Jul 2004;192(7):487-493.
124. Korner M, Wirtz MA. Development and psychometric properties of a scale for measuring internal participation from a patient and health care professional perspective. *BMC health services research*. 2013;13:374.
125. Hojat M, Mangione S, Nasca T, Cohen M, Gonnella J, Erdmann J. The Jefferson Scale of Physician Empathy: development and preliminary psychometric data. *Educational Psychology Measurement*. 2001;61:349-365.
126. Jones J, Barry MM. Developing a scale to measure synergy in health promotion partnerships. *Global health promotion*. Jun 2011;18(2):36-44.
127. Kim SC, Boren D, Solem SL. The Kim Alliance Scale: development and preliminary testing. *Clinical nursing research*. Aug 2001;10(3):314-331.
128. Byrne JM, Chang BK, Gilman SC, et al. The learners' perceptions survey-primary care: assessing resident perceptions of internal medicine continuity clinics and patient-centered care. *Journal of graduate medical education*. Dec 2013;5(4):587-593.
129. Campbell C, Lockyer J, Laidlaw T, Macleod H. Assessment of a matched-pair instrument to examine doctor-patient communication skills in practising doctors. *Medical education*. Feb 2007;41(2):123-129.
130. King M, Jones L, Richardson A, et al. The relationship between patients' experiences of continuity of cancer care and health outcomes: a mixed methods study. *British journal of cancer*. Feb 12 2008;98(3):529-536.
131. Bjerre IM, Larsson M, Franzon AM, Nilsson MS, Stromberg G, Westbom LM. Measure of Processes of Care (MPOC) applied to measure parent's perception of the habilitation process in Sweden. *Child: care, health and development*. Mar 2004;30(2):123-130.
132. Himuro N, Kozuka N, Mori M. Measurement of family-centred care: translation, adaptation and validation of the Measure of Processes of Care (MPOC-56 and -20) for use in Japan. *Child: care, health and development*. May 2013;39(3):358-365.
133. Klassen AF, Dix D, Cano SJ, Papsdorf M, Sung L, Klaassen RJ. Evaluating family-centred service in paediatric oncology with the measure of processes of care (MPOC-20). *Child: care, health and development*. Jan 2009;35(1):16-22.
134. Saloojee GM, Rosenbaum PR, Westaway MS, Stewart AV. Development of a measure of family-centred care for resource-poor South African settings: the experience of using a modified version of the MPOC-20. *Child: care, health and development*. Jan 2009;35(1):23-32.
135. Tang HN, Chong WH, Goh W, Chan WP, Choo S. Evaluation of family-centred practices in the early intervention programmes for infants and young children in Singapore with Measure of Processes of Care for Service Providers and Measure of Beliefs about Participation in Family-Centred Service. *Child: care, health and development*. Jan 2012;38(1):54-60.
136. King S, King G, Rosenbaum P. Evaluating Health Service Delivery to Children With Chronic Conditions and Their Families: Development of a Refined Measure of Processes of Care (MPOC-20). *Children's Health Care*. 2004/03/01 2004;33(1):35-57.
137. King SM, Rosenbaum PL, King GA. Parents' perceptions of caregiving: development and validation of a measure of processes. *Developmental medicine and child neurology*. Sep 1996;38(9):757-772.
138. McConachie H, Logan S. Validation of the measure of processes of care for use when there is no Child Development Centre. *Child: care, health and development*. Jan 2003;29(1):35-45.
139. Siebes R, Maassen GH, Wijnroks L, et al. Quality of paediatric rehabilitation from the parent perspective: validation of the short Measure of Processes of Care (MPOC-20) in the Netherlands. *Clinical rehabilitation*. Jan 2007;21(1):62-72.
140. Woodside JM, Rosenbaum PL, King SM, King GA. Family-Centered Service: Developing and Validating a Self-Assessment Tool for Pediatric Service Providers. *Children's Health Care*. 2001/09/01 2001;30(3):237-252.
141. Goold SD, Fessler D, Moyer CA. A measure of trust in insurers. *Health services research*. Feb 2006;41(1):58-78.
142. Chappell NL, Reid RC, Gish JA. Staff-based measures of individualized care for persons with dementia in long-term care facilities. *Dementia*. November 1, 2007 2007;6(4):527-547.
143. Harley C, Adams J, Booth L, Selby P, Brown J, Velikova G. Patient experiences of continuity of cancer care: development of a new medical care questionnaire (MCQ) for oncology outpatients. *Value in health : the journal of the International Society for Pharmacoeconomics and Outcomes Research*. Nov-Dec 2009;12(8):1180-1186.
144. Cegala DJ, Coleman MT, Turner JW. The development and partial assessment of the medical communication competence scale. *Health communication*. 1998;10(3):261-288.
145. Cooley WC, McAllister JW, Sherrieb K, Clark RE. The Medical Home Index: development and validation of a new practice-level measure of implementation of the Medical Home model. *Ambulatory pediatrics : the official journal of the Ambulatory Pediatric Association*. Jul-Aug 2003;3(4):173-180.

146. Valentine NB, Bonsel GJ, Murray CJ. Measuring quality of health care from the user's perspective in 41 countries: psychometric properties of WHO's questions on health systems responsiveness. *Quality of life research : an international journal of quality of life aspects of treatment, care and rehabilitation*. Sep 2007;16(7):1107-1125.
147. Egede LE, Ellis C. Development and testing of the Multidimensional Trust in Health Care Systems Scale. *Journal of general internal medicine*. Jun 2008;23(6):808-815.
148. Bentler SE, Morgan RO, Virnig BA, Wolinsky FD. Evaluation of a patient-reported continuity of care model for older adults. *Quality of life research : an international journal of quality of life aspects of treatment, care and rehabilitation*. Feb 2014;23(1):185-193.
149. Uijen AA, Schellevis FG, van den Bosch WJ, Mokkink HG, van Weel C, Schers HJ. Nijmegen Continuity Questionnaire: development and testing of a questionnaire that measures continuity of care. *Journal of clinical epidemiology*. Dec 2011;64(12):1391-1399.
150. Uijen AA, Heinst CW, Schellevis FG, et al. Measurement properties of questionnaires measuring continuity of care: a systematic review. *PLoS one*. 2012;7(7):e42256.
151. Mueller C, Savik K. Identifying and validating the components of nursing practice models for long-term care facilities. *Research in gerontological nursing*. Oct 2010;3(4):270-281.
152. Elwyn G, Edwards A, Wensing M, Hood K, Atwell C, Grol R. Shared decision making: developing the OPTION scale for measuring patient involvement. *Quality & safety in health care*. Apr 2003;12(2):93-99.
153. Radwin L, Alster K, Rubin KM. Development and testing of the Oncology Patients' Perceptions of the Quality of Nursing Care Scale. *Oncology nursing forum*. Mar-Apr 2003;30(2):283-290.
154. Garratt AM, Bjaertnes OA, Krogstad U, Gulbrandsen P. The OutPatient Experiences Questionnaire (OPEQ): data quality, reliability, and validity in patients attending 52 Norwegian hospitals. *Quality & safety in health care*. Dec 2005;14(6):433-437.
155. Pett MA, Beck SL, Guo JW, et al. Confirmatory factor analysis of the pain care quality surveys (PainCQ(c)). *Health services research*. Jun 2013;48(3):1018-1038.
156. Beck SL, Towsley GL, Berry PH, Brant JM, Smith EM. Measuring the quality of care related to pain management: a multiple-method approach to instrument development. *Nursing research*. Mar-Apr 2010;59(2):85-92.
157. Beck SL, Towsley GL, Pett MA, et al. Initial Psychometric Properties of the Pain Care Quality Survey (PainCQ). *The journal of pain : official journal of the American Pain Society*. Dec 2010;11(12):1311-1319.
158. Seid M, Varni JW, Bermudez LO, et al. Parents' Perceptions of Primary Care: measuring parents' experiences of pediatric primary care quality. *Pediatrics*. Aug 2001;108(2):264-270.
159. Epstein EG, Miles A, Rovnyak V, Baernholdt M. Parents' perceptions of continuity of care in the neonatal intensive care unit: pilot testing an instrument and implications for the nurse-parent relationship. *The Journal of perinatal & neonatal nursing*. Apr-Jun 2013;27(2):168-175.
160. Fowles JB, Terry P, Xi M, Hibbard J, Bloom CT, Harvey L. Measuring self-management of patients' and employees' health: further validation of the Patient Activation Measure (PAM) based on its relation to employee characteristics. *Patient education and counseling*. Oct 2009;77(1):116-122.
161. Skolasky RL, Green AF, Scharfstein D, Boulton C, Reider L, Wegener ST. Psychometric properties of the patient activation measure among multimorbid older adults. *Health services research*. Apr 2011;46(2):457-478.
162. Hibbard JH, Mahoney ER, Stockard J, Tusler M. Development and testing of a short form of the patient activation measure. *Health services research*. Dec 2005;40(6 Pt 1):1918-1930.
163. Hibbard JH, Stockard J, Mahoney ER, Tusler M. Development of the Patient Activation Measure (PAM): conceptualizing and measuring activation in patients and consumers. *Health services research*. Aug 2004;39(4 Pt 1):1005-1026.
164. Balstad A, Springer P. Quantifying case management workloads: Development of the PACE tool. *Lippincott's case management : managing the process of patient care*. Nov-Dec 2006;11(6):291-302; quiz 303-294.
165. Cramm JM, Nieboer AP. Factorial validation of the Patient Assessment of Chronic Illness Care (PACIC) and PACIC short version (PACIC-S) among cardiovascular disease patients in the Netherlands. *Health and quality of life outcomes*. 2012;10:104.
166. Glasgow RE, Wagner EH, Schaefer J, Mahoney LD, Reid RJ, Greene SM. Development and validation of the Patient Assessment of Chronic Illness Care (PACIC). *Medical care*. May 2005;43(5):436-444.
167. Gugiu PC, Coryn C, Clark R, Kuehn A. Development and evaluation of the short version of the Patient Assessment of Chronic Illness Care instrument. *Chronic illness*. Dec 2009;5(4):268-276.
168. Rosemann T, Laux G, Droeemeyer S, Gensichen J, Szecsenyi J. Evaluation of a culturally adapted German version of the Patient Assessment of Chronic Illness Care (PACIC 5A) questionnaire in a sample of osteoarthritis patients. *Journal of evaluation in clinical practice*. Oct 2007;13(5):806-813.
169. Aragones A, Schaefer EW, Stevens D, Gourevitch MN, Glasgow RE, Shah NR. Validation of the Spanish translation of the Patient Assessment of Chronic Illness Care (PACIC) survey. *Preventing chronic disease*. Oct 2008;5(4):A113.
170. Cramm J, Coryn C, Applegate B. Structure and measurement properties of the Patient Assessment of Chronic Illness Care instrument. *Journal of evaluation in clinical practice*. Jun 2010;16(3):509-516.
171. Wensing M, van Lieshout J, Jung HP, Hermsen J, Rosemann T. The Patients Assessment Chronic Illness Care (PACIC) questionnaire in The Netherlands: a validation study in rural general practice. *BMC health services research*. 2008;8:182.
172. Baker R, Preston C, Cheater F, Hearnshaw H. Measuring patients' attitudes to care across the primary/secondary interface: the development of the patient career diary. *Quality in health care : QHC*. Sep 1999;8(3):154-160.
173. Hadjistavropoulos H, Biem H, Sharpe D, Bourgault-Fagnou M, Janzen J. Patient perceptions of hospital discharge: reliability and validity of a Patient Continuity of Care Questionnaire. *International journal for quality in health care : journal of the International Society for Quality in Health Care / ISQua*. Oct 2008;20(5):314-323.
174. Pettersen KI, Veenstra M, Guldvog B, Kolstad A. The Patient Experiences Questionnaire: development, validity and reliability. *International journal for quality in health care : journal of the International Society for Quality in Health Care / ISQua*. Dec 2004;16(6):453-463.
175. Steine S, Finset A, Laerum E. A new, brief questionnaire (PEQ) developed in primary health care for measuring patients' experience of interaction, emotion and consultation outcome. *Family practice*. Aug 2001;18(4):410-418.
176. Constand MK, MacDermid JC, Law M, Dal Bello-Haas V. Patient-centered care and distal radius fracture outcomes: A prospective cohort study analysis. *Journal of hand therapy : official journal of the American Society of Hand Therapists*. Apr 23 2014.
177. Singer SJ, Friedberg MW, Kiang MV, Dunn T, Kuhn DM. Development and preliminary validation of the Patient Perceptions of Integrated Care survey. *Medical care research and review : MCRR*. Apr 2013;70(2):143-164.
178. Galassi JP, Schanberg R, Ware WB. The Patient Reactions Assessment: A brief measure of the quality of the patient-provider medical relationship. *Psychological Assessment*. 1992;4(3):346-351.
179. Kempainen JK, O'Brien L, Williams H, Evans L, Weiner KN, Holzemer WL. Quantifying patient engagement with nurses: validation of a scale with AIDS patients. *Outcomes management for nursing practice*. Oct-Dec 1999;3(4):167-174.
180. Ngorsuraches S, Lerkiatbundit S, Li SC, Treesak C, Sirithorn R, Korwiwattanakarn M. Development and validation of the patient trust in community pharmacists (TRUST-Ph) scale: results from a study conducted in Thailand. *Research in social & administrative pharmacy : RSAP*. Sep 2008;4(3):272-283.
181. Hannum Rose J, Bowman KF, O'Toole EE, et al. Caregiver objective burden and assessments of patient-centered, family-focused care for frail elderly veterans. *The Gerontologist*. Feb 2007;47(1):21-33.
182. Alexander JA, Paustian M, Wise CG, et al. Assessment and measurement of patient-centered medical home implementation: the BCBSM experience. *Annals of family medicine*. May-Jun 2013;11 Suppl 1:S74-81.
183. Chesser A, Reyes J, Woods NK, Williams K, Kraft R. Reliability in patient-centered observations of family physicians. *Family medicine*. Jun 2013;45(6):428-432.
184. Pedro J, Canavarró MC, Boivin J, Gameiro S. Positive experiences of patient-centred care are associated with intentions to comply with fertility treatment: findings from the validation of the Portuguese version of the PCQ-Infertility tool. *Human reproduction (Oxford, England)*. Sep 2013;28(9):2462-2472.
185. van der Eijk M, Faber MJ, Ummels I, Aarts JW, Munneke M, Bloem BR. Patient-centeredness in PD care: development and validation of a patient experience questionnaire. *Parkinsonism & related disorders*. Nov 2012;18(9):1011-1016.
186. van Empel IW, Aarts JW, Cohlen BJ, et al. Measuring patient-centredness, the neglected outcome in fertility care: a random multicentre validation study. *Human reproduction (Oxford, England)*. Oct 2010;25(10):2516-2526.
187. Henbest RJ, Stewart MA. Patient-centredness in the consultation. 1: A method for measurement. *Family practice*. Dec 1989;6(4):249-253.
188. Hwang JI. Development and testing of a patient-centred care competency scale for hospital nurses. *International journal of nursing practice*. Nov 13 2013.
189. de Kok M, Sixma HJ, van der Weijden T, et al. A patient-centred instrument for assessment of quality of breast cancer care: results of a pilot questionnaire. *Quality & safety in health care*. Dec 2010;19(6):e40.
190. Rolfe G. The Patient-Centredness Multi-Choice Questionnaire: developing an instrument for the measurement of patient-centredness in student nurses. *Journal of advanced nursing*. Jan 1993;18(1):120-126.
191. Ridd MJ, Lewis G, Peters TJ, Salisbury C. Patient-doctor depth-of-relationship scale: development and validation. *Annals of family medicine*. Nov-Dec 2011;9(6):538-545.
192. Mingote Adan J, Moreno Jimenez B, Rodriguez Carvajal R, Galvez Herrer M, Ruiz Lopez P. Psychometric validation of the Spanish version of the Patient-Doctor Relationship Questionnaire (PDRQ). *Actas espanolas de psiquiatria*. Mar-Apr 2009;37(2):94-100.
193. Van der Feltz-Cornelis CM, Van Oppen P, Van Marwijk HW, De Beurs E, Van Dyck R. A patient-doctor relationship questionnaire (PDRQ-9) in primary care: development and psychometric evaluation. *General hospital psychiatry*. Mar-Apr 2004;26(2):115-120.
194. Juhnke C, Muhlbacher AC. Patient-centredness in integrated healthcare delivery systems - needs, expectations and priorities for organised healthcare systems. *International journal of integrated care*. 2013;13:e051.
195. Stewart AL, Napoles-Springer AM, Gregorich SE, Santoyo-Olsson J. Interpersonal processes of care survey: patient-reported measures for diverse groups. *Health services research*. Jun 2007;42(3 Pt 1):1235-1256.
196. Chao J. Continuity of care: incorporating patient perceptions. *Family medicine*. Sep-Oct 1988;20(5):333-337.
197. Carmen S, Teal S, Guzzetta CE. Development, testing, and national evaluation of a pediatric Patient-Family-Centered Care benchmarking survey. *Holistic nursing practice*. Mar-Apr 2008;22(2):61-74; quiz 75-66.
198. Moseley KL, Clark SJ, Gebremariam A, Sternthal MJ, Kemper AR. Parents' trust in their child's physician: using an adapted Trust in Physician Scale. *Ambulatory pediatrics : the official journal of the Ambulatory Pediatric Association*. Jan-Feb 2006;6(1):58-61.
199. Smith MY, Winkel G, Egert J, Diaz-Wionczek M, DuHamel KN. Patient-physician communication in the context of persistent pain: validation of a modified version of the patients' Perceived Involvement in Care Scale. *Journal of pain and symptom management*. Jul 2006;32(1):71-81.
200. Lerman CE, Brody DS, Caputo GC, Smith DG, Lazaro CG, Wolfson HG. Patients' Perceived Involvement in Care Scale: relationship to attitudes about illness and medical care. *Journal of general internal medicine*. Jan-Feb 1990;5(1):29-33.
201. Rokstad AM, Engedal K, Edvardsson D, Selbaek G. Psychometric evaluation of the Norwegian version of the Person-centred Care Assessment Tool. *International journal of nursing practice*. Feb 2012;18(1):99-105.
202. Sjogren K, Lindkvist M, Sandman PO, Zingmark K, Edvardsson D. Psychometric evaluation of the Swedish version of the Person-Centered Care Assessment Tool (P-CAT). *International psychogeriatrics / IPA*. Mar 2012;24(3):406-415.
203. Edvardsson D, Fetherstonhaugh D, Nay R, Gibson S. Development and initial testing of the Person-centered Care Assessment Tool (P-CAT). *International psychogeriatrics / IPA*. Feb 2010;22(1):101-108.
204. Nilsson A, Lindkvist M, Rasmussen BH, Edvardsson D. Measuring levels of person-centeredness in acute care of older people with cognitive impairment: evaluation of the POPAC scale. *BMC health services research*. 2013;13:327.
205. Edvardsson D, Nilsson A, Fetherstonhaugh D, Nay R, Crowe S. The person-centred care of older people with cognitive impairment in acute care scale (POPAC). *Journal of nursing management*. Jan 2013;21(1):79-86.
206. Holburn S, Jacobson JW, Vietze PM, Schwartz AA, Sersen E. Quantifying the process and outcomes of person-centered planning. *American journal of mental retardation : AJMR*. Sep 2000;105(5):402-416.
207. Bergland A, Kirkevold M, Edvardsson D. Psychometric properties of the Norwegian Person-centred Climate Questionnaire from a nursing home context. *Scandinavian journal of caring sciences*. Dec 2012;26(4):820-828.
208. Edvardsson D, Koch S, Nay R. Psychometric evaluation of the English Language Person-Centered Climate Questionnaire--Patient version. *Western journal of nursing research*. Mar 2009;31(2):235-244.
209. Edvardsson D, Koch S, Nay R. Psychometric evaluation of the English language Person-centred Climate Questionnaire--staff version. *Journal of nursing management*. Jan 2010;18(1):54-60.

210. Edvardsson D, Sandman PO, Rasmussen B. Swedish language Person-centred Climate Questionnaire - patient version: construction and psychometric evaluation. *Journal of advanced nursing*. Aug 2008;63(3):302-309.
211. Edvardsson D, Sandman PO, Rasmussen B. Construction and psychometric evaluation of the Swedish language Person-centred Climate Questionnaire - staff version. *Journal of nursing management*. Nov 2009;17(7):790-795.
212. Dow B, Fearn M, Haralambous B, Tinney J, Hill K, Gibson S. Development and initial testing of the Person-Centred Health Care for Older Adults Survey. *International psychogeriatrics / IPA*. Jul 2013;25(7):1065-1076.
213. White DL, Newton-Curtis L, Lyons KS. Development and initial testing of a measure of person-directed care. *The Gerontologist*. Jul 2008;48 Spec No 1:114-123.
214. Clark BE, Mount JK. Pharmacy Service Orientation: a measure of organizational culture in pharmacy practice sites. *Research in social & administrative pharmacy : RSAP*. Mar 2006;2(1):110-128.
215. Ryan ME, Collins FJ, Dowd JB, Pierce PK. Measuring patient satisfaction: a case study. *Journal of nursing care quality*. Jan 1995;9(2):44-53.
216. Nagpal K, Abboudi M, Fischler L, et al. Evaluation of postoperative handover using a tool to assess information transfer and teamwork. *Annals of surgery*. Apr 2011;253(4):831-837.
217. Grimmer K, Moss J. The development, validity and application of a new instrument to assess the quality of discharge planning activities from the community perspective. *International journal for quality in health care : journal of the International Society for Quality in Health Care / ISQua*. Apr 2001;13(2):109-116.
218. Safran DG, Kosinski M, Tarlov AR, et al. The Primary Care Assessment Survey: tests of data quality and measurement performance. *Medical care*. May 1998;36(5):728-739.
219. Jeon KY. Cross-cultural adaptation of the US consumer form of the short Primary Care Assessment Tool (PCAT): the Korean consumer form of the short PCAT (KC PCAT) and the Korean standard form of the short PCAT (KS PCAT). *Quality in primary care*. 2011;19(2):85-103.
220. Cassady CE, Starfield B, Hurtado MP, Berk RA, Nanda JP, Friedenber LA. Measuring consumer experiences with primary care. *Pediatrics*. Apr 2000;105(4 Pt 2):998-1003.
221. Lee JH, Choi YJ, Sung NJ, et al. Development of the Korean primary care assessment tool--measuring user experience: tests of data quality and measurement performance. *International journal for quality in health care : journal of the International Society for Quality in Health Care / ISQua*. Apr 2009;21(2):103-111.
222. Macinko J, Almeida C, de Sa PK. A rapid assessment methodology for the evaluation of primary care organization and performance in Brazil. *Health policy and planning*. May 2007;22(3):167-177.
223. Shi L, Starfield B, Xu J. Validating the adult primary care assessment tool. *J Fam Pract*. 2001;50(2):161-175.
224. Beehler GP, Funderburk JS, Possemato K, Dollar KM. Psychometric assessment of the Primary Care Behavioral Health Provider Adherence Questionnaire (PPAQ). *Translational behavioral medicine*. Dec 2013;3(4):379-391.
225. Tarrant C, Baker R, Colman AM, et al. The prostate care questionnaire for patients (PCQ-P): reliability, validity and acceptability. *BMC health services research*. 2009;9:199.
226. Yun YH, Kim SH, Lee KM, et al. Patient-reported assessment of quality care at end of life: development and validation of Quality Care Questionnaire-End of Life (QCQ-EOL). *European journal of cancer (Oxford, England : 1990)*. Sep 2006;42(14):2310-2317.
227. Wilde B, Larsson G, Larsson M, Starrin B. Quality of care. Development of a patient-centred questionnaire based on a grounded theory model. *Scandinavian journal of caring sciences*. 1994;8(1):39-48.
228. van Weert JC, Jansen J, de Bruijn GJ, Noordman J, van Dulmen S, Bensing JM. QUOTEchemo: a patient-centred instrument to measure quality of communication preceding chemotherapy treatment through the patient's eyes. *European journal of cancer (Oxford, England : 1990)*. Nov 2009;45(17):2967-2976.
229. Nijkamp MD, Sixma HJ, Afman H, et al. Quality of care from the perspective of the cataract patient: the reliability and validity of the QUOTE-cataract. *The British journal of ophthalmology*. Aug 2002;86(8):840-842.
230. Sixma HJ, van Campen C, Keressens JJ, Peters L. Quality of care from the perspective of elderly people: the QUOTE-elderly instrument. *Age and ageing*. Mar 2000;29(2):173-178.
231. van Campen C, Sixma HJ, Keressens JJ, Peters L, Rasker JJ. Assessing patients' priorities and perceptions of the quality of health care: the development of the QUOTE-Rheumatic-Patients instrument. *British journal of rheumatology*. Apr 1998;37(4):362-368.
232. van der Eijk I, Sixma H, Smeets T, et al. Quality of health care in inflammatory bowel disease: development of a reliable questionnaire (QUOTE-IBD) and first results. *The American journal of gastroenterology*. Dec 2001;96(12):3329-3336.
233. Curtis JR, Patrick DL, Engelberg RA, Norris K, Asp C, Byock I. A measure of the quality of dying and death. Initial validation using after-death interviews with family members. *Journal of pain and symptom management*. Jul 2002;24(1):17-31.
234. Sulmasy DP, McIlvane JM, Pasley PM, Rahn M. A scale for measuring patient perceptions of the quality of end-of-life care and satisfaction with treatment: the reliability and validity of QUEST. *Journal of pain and symptom management*. Jun 2002;23(6):458-470.
235. Engelberg R, Downey L, Curtis JR. Psychometric characteristics of a quality of communication questionnaire assessing communication about end-of-life care. *Journal of palliative medicine*. Oct 2006;9(5):1086-1098.
236. Steinhauer KE, Voils CI, Bosworth H, Tulsy JA. Validation of a Measure of Family Experience of Patients With Serious Illness: The QUAL-E (Fam). *Journal of pain and symptom management*. May 22 2014.
237. Schroder A, Larsson BW, Ahlstrom G, Lundqvist LO. Psychometric properties of the instrument quality in psychiatric care and descriptions of quality of care among in-patients. *International journal of health care quality assurance*. 2010;23(6):554-570.
238. Shelton RC, Winkel G, Davis SN, et al. Validation of the group-based medical mistrust scale among urban black men. *Journal of general internal medicine*. Jun 2010;25(6):549-555.
239. Gulliford M, Cowie L, Morgan M. Relational and management continuity survey in patients with multiple long-term conditions. *Journal of health services research & policy*. Apr 2011;16(2):67-74.
240. Gallagher TJ, Hartung PJ, Gregory SW. Assessment of a measure of relational communication for doctor-patient interactions. *Patient education and counseling*. Dec 1 2001;45(3):211-218.
241. Gallagher TJ, Hartung PJ, Gerzina H, Gregory SW, Jr., Merolla D. Further analysis of a doctor-patient nonverbal communication instrument. *Patient education and counseling*. Jun 2005;57(3):262-271.
242. Shea JA, Micco E, Dean LT, McMurphy S, Schwartz JS, Armstrong K. Development of a revised Health Care System Distrust scale. *Journal of general internal medicine*. Jun 2008;23(6):727-732.
243. Shields CG, Franks P, Fiscella K, Meldrum S, Epstein RM. Rochester Participatory Decision-Making Scale (RPAD): reliability and validity. *Annals of family medicine*. Sep-Oct 2005;3(5):436-442.
244. Birnberg JM, Drum ML, Huang ES, et al. Development of a safety net medical home scale for clinics. *Journal of general internal medicine*. Dec 2011;26(12):1418-1425.
245. Ahgren B, Axelsson R. Evaluating integrated health care: a model for measurement. *International journal of integrated care*. 2005;5:e01; discussion e03, e09.
246. McGuire-Snieckus R, McCabe R, Catty J, Hansson L, Priebe S. A new scale to assess the therapeutic relationship in community mental health care: STAR. *Psychological medicine*. Jan 2007;37(1):85-95.
247. Tomes AE, Chee Peng Ng S. Service quality in hospital care: the development of an in-patient questionnaire. *International journal of health care quality assurance*. 1995;8(3):25-33.
248. Babakus E, Mangold WG. Adapting the SERVQUAL scale to hospital services: an empirical investigation. *Health services research*. Feb 1992;26(6):767-786.
249. Vandamme R, Leunis J. Development of a Multiple-item Scale for Measuring Hospital Service Quality. *International Journal of Service Industry Management*. 1993;4(3):30-49.
250. Campbell HS, Hall AE, Sanson-Fisher RW, Barker D, Turner D, Taylor-Brown J. Development and validation of the Short-Form Survivor Unmet Needs Survey (SF-SUNS). *Supportive care in cancer : official journal of the Multinational Association of Supportive Care in Cancer*. Apr 2014;22(4):1071-1079.
251. Campbell HS, Sanson-Fisher R, Turner D, Hayward L, Wang XS, Taylor-Brown J. Psychometric properties of cancer survivors' unmet needs survey. *Supportive care in cancer : official journal of the Multinational Association of Supportive Care in Cancer*. Feb 2010;19(2):221-230.
252. Hodgkinson K, Butow P, Hobbs KM, Hunt GE, Lo SK, Wain G. Assessing unmet supportive care needs in partners of cancer survivors: the development and evaluation of the Cancer Survivors' Partners Unmet Needs measure (CaSPUN). *Psycho-oncology*. Sep 2007;16(9):805-813.
253. Hodgkinson K, Butow P, Hunt GE, et al. The development and evaluation of a measure to assess cancer survivors' unmet supportive care needs: the CaSUN (Cancer Survivors' Unmet Needs measure). *Psycho-oncology*. Sep 2007;16(9):796-804.
254. Zwart DL, Langelaan M, van de Vooren RC, et al. Patient safety culture measurement in general practice. Clinimetric properties of 'SCOPE'. *BMC family practice*. 2011;12:117.
255. Omondi Aduda DS, Ouma C, Onyango R, Onyango M, Bertrand J. Systematic monitoring of male circumcision scale-up in Nyanza, Kenya: exploratory factor analysis of service quality instrument and performance ranking. *PloS one*. 2014;9(7):e101235.
256. Cooper S, Cant R, Porter J, et al. Rating medical emergency teamwork performance: development of the Team Emergency Assessment Measure (TEAM). *Resuscitation*. Apr 2010;81(4):446-452.
257. Taylor C, Brown K, Lamb B, Harris J, Sevdalis N, Green JS. Developing and testing TEAM (Team Evaluation and Assessment Measure), a self-assessment tool to improve cancer multidisciplinary teamwork. *Annals of surgical oncology*. Dec 2012;19(13):4019-4027.
258. Mack JW, Block SD, Nilsson M, et al. Measuring therapeutic alliance between oncologists and patients with advanced cancer: the Human Connection Scale. *Cancer*. Jul 15 2009;115(14):3302-3311.
259. Pinsof WM, Zinbarg R, Knobloch-Fedders LM. Factorial and construct validity of the revised short form integrative psychotherapy alliance scales for family, couple, and individual therapy. *Family process*. Sep 2008;47(3):281-301.
260. Radwin LE, Cabral HJ. Trust in Nurses Scale: construct validity and internal reliability evaluation. *Journal of advanced nursing*. Mar 2010;66(3):683-689.
261. Radwin LE, Washko M, Suchy KA, Tyman K. Development and pilot testing of four desired health outcomes scales. *Oncology nursing forum*. Jan 2005;32(1):92-96.
262. Hillen MA, Koning CC, Wilink JW, et al. Assessing cancer patients' trust in their oncologist: development and validation of the Trust in Oncologist Scale (TiOS). *Supportive care in cancer : official journal of the Multinational Association of Supportive Care in Cancer*. Aug 2012;20(8):1787-1795.
263. Anderson LA, Dedrick RF. Development of the Trust in Physician scale: a measure to assess interpersonal trust in patient-physician relationships. *Psychological reports*. Dec 1990;67(3 Pt 2):1091-1100.
264. Freburger JK, Callahan LF, Currey SS, Anderson LA. Use of the Trust in Physician Scale in patients with rheumatic disease: psychometric properties and correlates of trust in the rheumatologist. *Arthritis and rheumatism*. Feb 15 2003;49(1):51-58.
265. Thom DH, Ribisl KM, Stewart AL, Luke DA. Further validation and reliability testing of the Trust in Physician Scale. The Stanford Trust Study Physicians. *Medical care*. May 1999;37(5):510-517.
266. Hall MA, Camacho F, Dugan E, Balkrishnan R. Trust in the medical profession: conceptual and measurement issues. *Health services research*. Oct 2002;37(5):1419-1439.
267. Mirsu-Paun A, Tucker CM, Herman KC, Hernandez CA. Validation of a provider self-report inventory for measuring patient-centered cultural sensitivity in health care using a sample of medical students. *Journal of community health*. Apr 2010;35(2):198-207.
268. Tucker CM, Mirsu-Paun A, Van den Berg JJ, et al. Assessments for measuring patient-centered cultural sensitivity in community-based primary care clinics. *Journal of the National Medical Association*. Jun 2007;99(6):609-619.
269. Adams R, Price K, Tucker G, Nguyen AM, Wilson D. The doctor and the patient--how is a clinical encounter perceived? *Patient education and counseling*. Jan 2012;86(1):127-133.
270. McLaughlin SE, Diener-West M, Indurkha A, Rubin H, Heckmann R, Boyle MP. Improving transition from pediatric to adult cystic fibrosis care: lessons from a national survey of current practices. *Pediatrics*. May 2008;121(5):e1160-1166.
271. Nuno-Solinis R, Berraondo Zabalegui I, Sauto Arce R, San Martin Rodriguez L, Toro Polanco N. Development of a questionnaire to assess interprofessional collaboration between two different care levels. *International journal of integrated care*. Apr 2013;13:e015.
272. Ouwens M, Hermens R, Hulscher M, et al. Development of indicators for patient-centred cancer care. *Supportive care in cancer : official journal of the Multinational Association of Supportive Care in Cancer*. Jan 2010;18(1):121-130.
273. Samele C, Gilvarry C, Walsh E, Manley C, van Os J, Murray R. Patients' perceptions of intensive case management. *Psychiatric services (Washington, D.C.)*. Nov 2002;53(11):1432-1437.

274. Shields L, Tanner A. Pilot study of a tool to investigate perceptions of family-centered care in different care settings. *Pediatric nursing*. May-Jun 2004;30(3):189-197.
275. Sidani S. Effects of patient-centered care on patient outcomes: an evaluation. *Research and theory for nursing practice*. 2008;22(1):24-37.
276. Straten GF, Friele RD, Groenewegen PP. Public trust in Dutch health care. *Social science & medicine (1982)*. Jul 2002;55(2):227-234.
277. Uyei J, Coetzee D, Macinko J, Weinberg SL, Guttmacher S. Measuring the degree of integrated tuberculosis and HIV service delivery in Cape Town, South Africa. *Health policy and planning*. Jan 2014;29(1):42-55.
278. Van den Broeck U, Spiessens C, Dancet E, et al. Patient evaluation of infertility management in an ISO 9001:2008-certified centre for reproductive medicine. *Reproductive biomedicine online*. Mar 2012;24(3):293-300.
279. Wei X, Barnsley J, Zakus D, Cockerill R, Glazier R, Sun X. Assessing continuity of care in a community diabetes program: initial questionnaire development and validation. *Journal of clinical epidemiology*. Sep 2008;61(9):925-931.
280. Zineldin M, Camgoz-Akdag H, Vasicheva V. Measuring, evaluating and improving hospital quality parameters/dimensions--an integrated healthcare quality approach. *International journal of health care quality assurance*. 2011;24(8):654-662.
281. de Kok M, Scholte RW, Sixma HJ, et al. The patient's perspective of the quality of breast cancer care. The development of an instrument to measure quality of care through focus groups and concept mapping with breast cancer patients. *European journal of cancer (Oxford, England : 1990)*. May 2007;43(8):1257-1264.
282. Grol R, de Maeseneer J, Whitfield M, Mokkink H. Disease-centred versus patient-centred attitudes: comparison of general practitioners in Belgium, Britain and The Netherlands. *Family practice*. Jun 1990;7(2):100-103.
283. Kelly JJ, Njuki F, Lane PL, McKinley RK. Design of a questionnaire to measure trust in an emergency department. *Academic emergency medicine : official journal of the Society for Academic Emergency Medicine*. Feb 2005;12(2):147-151.
284. Leisen B, Hyman MR. An improved scale for assessing patients' trust in their physician. *Health marketing quarterly*. 2001;19(1):23-42.
285. Temkin-Greener H, Gross D, Kunitz SJ, Mukamel D. Measuring interdisciplinary team performance in a long-term care setting. *Medical care*. May 2004;42(5):472-481.
286. Little P, Everitt H, Williamson I, et al. Observational study of effect of patient centredness and positive approach on outcomes of general practice consultations. *BMJ (Clinical research ed.)*. Oct 20 2001;323(7318):908-911.
287. Thom DH, Wong ST, Guzman D, et al. Physician trust in the patient: development and validation of a new measure. *Annals of family medicine*. Mar-Apr 2011;9(2):148-154.
288. Wressle E, Eriksson L, Fahlander A, et al. Relatives' perspective on the quality of geriatric care and rehabilitation--development and testing of a questionnaire. *Scandinavian journal of caring sciences*. Dec 2008;22(4):590-595.
289. Young JM, Walsh J, Butow PN, Solomon MJ, Shaw J. Measuring cancer care coordination: development and validation of a questionnaire for patients. *BMC cancer*. 2011;11:298.
290. Zhang XH, Jin J, Ngorsuraches S, Li SC. Development and validation of a scale to measure patients' trust in pharmacists in Singapore. *Patient preference and adherence*. 2009;3:1-7.
291. Saturno PJ, Martinez-Nicolas I, Robles-Garcia IS, Lopez-Soriano F, Angel-Garcia D. Development and pilot test of a new set of good practice indicators for chronic cancer pain management. *European journal of pain (London, England)*. Jan 2015;19(1):28-38.
292. Hiidenhovi H, Laippala P, Nojonen K. Development of a patient-orientated instrument to measure service quality in outpatient departments. *Journal of advanced nursing*. Jun 2001;34(5):696-705.
293. Haddad S, Potvin L, Roberge D, Pineault R, Remondin M. Patient perception of quality following a visit to a doctor in a primary care unit. *Family practice*. Feb 2000;17(1):21-29.
294. Lukas CV, Meterko M, Lowcock S, et al. Monitoring the progress of system integration. *Quality management in health care*. Winter 2002;10(2):1-11.
295. Masters S, Giles L, Halbert J, Crotty M. Development and testing of a questionnaire to measure older people's experience of the Transition Care Program in Australia. *Australasian journal on ageing*. Dec 2010;29(4):172-178.
296. Shelef K, Diamond GM. Short form of the revised Vanderbilt therapeutic alliance scale: development, reliability, and validity. *Psychotherapy research : journal of the Society for Psychotherapy Research*. Jul 2008;18(4):433-443.
297. Del Piccolo L, Mead N, Gask L, et al. The English version of the Verona medical interview classification system (VR-MICS). An assessment of its reliability and a comparative cross-cultural test of its validity. *Patient education and counseling*. Sep 2005;58(3):252-264.
298. Bachinger SM, Kolk AM, Smets EM. Patients' trust in their physician--psychometric properties of the Dutch version of the "Wake Forest Physician Trust Scale". *Patient education and counseling*. Jul 2009;76(1):126-131.
299. Hall MA, Zheng B, Dugan E, et al. Measuring patients' trust in their primary care providers. *Medical care research and review : MCRR*. Sep 2002;59(3):293-318.
300. Hatcher RL, Gillaspay JA. Development and validation of a revised short version of the Working Alliance Inventory. *Psychotherapy Research*. 2006;16(1):12-25.
