# Supplementary material
Source: PubMed Central journal article supplement (PMC5192798)
Supplement: MILQ-94-862-s004.pdf [file MILQ-94-862-s004.pdf]

Appendix D

Methodological quality of studies per measurement property

|     | Index Instrument<br>(209 index instruments)                     | Instrument Name and Version<br>(379 validations studies)                       | Reference Study<br>(300 articles) | Study<br>Code | Internal consistency<br>score | Reliability score | Measurement error<br>score | Content validity<br>score | Structural validity<br>score | Construct validity<br>score | Cross-cultural<br>validity score | Criterion validity<br>score | Responsiveness<br>score |
|-----|-----------------------------------------------------------------|--------------------------------------------------------------------------------|-----------------------------------|---------------|-------------------------------|-------------------|----------------------------|---------------------------|------------------------------|-----------------------------|----------------------------------|-----------------------------|-------------------------|
| 1.  | 4-point Ordinal Alliance Scale (4PAS)                           | 4-Point ordinal Alliance Scale (4PAS)                                          | Misdrahi <sup>1</sup>             | 554           | fair                          | not assessed      | not assessed               | not assessed              | fair                         | fair                        | not assessed                     | not assessed                | not assessed            |
| 2.  | Agnew Relationship Measure                                      | Agnew Relationship Measure                                                     | Agnew-Davies <sup>2</sup>         | 407           | fair                          | not assessed      | poor                       | excellent                 | fair                         | not assessed                | not assessed                     | not assessed                | not assessed            |
| 3.  |                                                                 | Agnew Relationship Measure                                                     | Stiles <sup>3</sup>               | 598           | fair                          | not assessed      | not assessed               | excellent                 | not assessed                 | poor                        | not assessed                     | not assessed                | not assessed            |
| 4.  |                                                                 | Agnew Relationship Measure                                                     | Stiles <sup>3</sup>               | 599           | fair                          | not assessed      | not assessed               | excellent                 | not assessed                 | poor                        | not assessed                     | not assessed                | not assessed            |
| 5.  | Alberta Continuity of Services Scale-Mental Health              | Alberta Continuity of Services Scale Mental Health                             | Durbin, J. <sup>4</sup>           | 110           | excellent                     | not assessed      | not assessed               | excellent                 | excellent                    | poor                        | not assessed                     | not assessed                | not assessed            |
| 6.  |                                                                 | Alberta Continuity of Services Scale-Mental Health                             | Joyce, A. S. <sup>5</sup>         | 206           | excellent                     | not assessed      | poor                       | not assessed              | excellent                    | good                        | not assessed                     | not assessed                | not assessed            |
| 7.  | Ambulatory Care Experiences Survey                              | Ambulatory Care Experiences Survey                                             | Safran <sup>6</sup>               | 576           | poor                          | not assessed      | not assessed               | not assessed              | not assessed                 | not assessed                | not assessed                     | not assessed                | not assessed            |
| 8.  | Assertive Community Treatment (TACT) Scale                      | Assertive Community Treatment (TACT) Scale                                     | Wholey, D. R. <sup>7</sup>        | 390           | fair                          | fair              | not assessed               | good                      | fair                         | fair                        | not assessed                     | not assessed                | not assessed            |
| 9.  | Assessment of Chronic Illness Care (ACIC)                       | Assessment of Chronic Illness Care (ACIC)                                      | Bonomi, A. E. <sup>8</sup>        | 55            | poor                          | not assessed      | not assessed               | fair                      | poor                         | poor                        | not assessed                     | not assessed                | poor                    |
| 10. |                                                                 | Assessment of Chronic Illness Care (ACIC)                                      | Cramm <sup>9</sup>                | 444           | not assessed                  | not assessed      | not assessed               | not assessed              | excellent                    | not assessed                | fair                             | not assessed                | poor                    |
| 11. |                                                                 | Assessment of Chronic Illness Care (ACIC) - Short Form                         | Cramm <sup>9</sup>                | 445           | good                          | not assessed      | not assessed               | not assessed              | excellent                    | not assessed                | fair                             | not assessed                | poor                    |
| 12. | Better Jobs Better Care PCC instrument                          | Better Jobs Better Care (BJBC) PCC Instrument                                  | Sullivan, J. L. <sup>10</sup>     | 351           | fair                          | not assessed      | not assessed               | good                      | not assessed                 | good                        | not assessed                     | not assessed                | not assessed            |
| 13. | California Psychotherapy Alliance Scales (CALPAS)               | California Psychotherapy Alliance Scales (CALPAS-P)                            | Barkham <sup>11</sup>             | 467           | good                          | not assessed      | not assessed               | excellent                 | good                         | good                        | not assessed                     | not assessed                | not assessed            |
| 14. |                                                                 | California Psychotherapy Alliance Scales (CALPAS-R)                            | Gaston <sup>12</sup>              | 421           | good                          | fair              | not assessed               | not assessed              | good                         | not assessed                | not assessed                     | not assessed                | not assessed            |
| 15. | Cancer services integration                                     | Cancer services integration                                                    | Dobrow, M. J. <sup>13</sup>       | 106           | excellent                     | not assessed      | not assessed               | good                      | excellent                    | fair                        | not assessed                     | not assessed                | not assessed            |
| 16. | Care Continuity Instrument                                      | Care Continuity Instrument (2 weeks and 2 months post-discharge)               | Bull, M. J. <sup>14</sup>         | 64            | fair                          | poor              | not assessed               | fair                      | fair                         | not assessed                | not assessed                     | not assessed                | poor                    |
| 17. |                                                                 | Care Continuity Instrument (2 weeks post-discharge)                            | Bull, M. J. <sup>14</sup>         | 63            | fair                          | poor              | not assessed               | fair                      | fair                         | not assessed                | not assessed                     | not assessed                | poor                    |
| 18. | Care Process Self Evaluation Tool (CPSET)                       | Care Process Self Evaluation Tool (CPSET)                                      | Seys, D. <sup>15</sup>            | 376           | fair                          | fair              | not assessed               | excellent                 | fair                         | fair                        | not assessed                     | fair                        | not assessed            |
| 19. |                                                                 | Care Process Self Evaluation Tool (CPSET)                                      | Vanhaecht, K. <sup>16</sup>       | 319           | fair                          | not assessed      | not assessed               | not assessed              | fair                         | not assessed                | not assessed                     | not assessed                | not assessed            |
| 20. | Care Transition Measure (CTM)                                   | Care Transition Measure (CTM)                                                  | Coleman <sup>17</sup>             | 439           | excellent                     | not assessed      | not assessed               | excellent                 | excellent                    | good                        | not assessed                     | not assessed                | not assessed            |
| 21. |                                                                 |                                                                                | Coleman <sup>18</sup>             | 440           | poor                          | not assessed      | not assessed               | excellent                 | not assessed                 | good                        | not assessed                     | poor                        | not assessed            |
| 22. |                                                                 | Care Transition Measure (CTM) 15 - Arabic version                              | Shadmi <sup>19</sup>              | 584           | excellent                     | not assessed      | not assessed               | not assessed              | excellent                    | good                        | poor                             | not assessed                | not assessed            |
| 23. |                                                                 | Care Transition Measure (CTM) 15 - Hebrew version                              | Shadmi <sup>19</sup>              | 583           | excellent                     | not assessed      | not assessed               | not assessed              | excellent                    | good                        | poor                             | not assessed                | not assessed            |
| 24. |                                                                 | CARE TRANSITION MEASURE (CTM)15                                                | Parry <sup>20</sup>               | 278           | poor                          | not assessed      | not assessed               | not assessed              | poor                         | fair                        | not assessed                     | not assessed                | not assessed            |
| 25. |                                                                 | CTM-15 (Care Transition Measure - 15 items) - Chinese                          | Bakshi <sup>21</sup>              | 27            | fair                          | not assessed      | poor                       | not assessed              | fair                         | fair                        | poor                             | poor                        | not assessed            |
| 26. |                                                                 | CTM-15 (Care Transition Measure - 15 items) - English                          | Bakshi <sup>21</sup>              | 25            | fair                          | not assessed      | poor                       | not assessed              | fair                         | fair                        | not assessed                     | poor                        | not assessed            |
| 27. |                                                                 | CTM-3 (Care Transition Measure - 3 items) - Chinese                            | Bakshi <sup>21</sup>              | 28            | fair                          | not assessed      | poor                       | not assessed              | fair                         | fair                        | poor                             | poor                        | not assessed            |
| 28. |                                                                 | CTM-3 (Care Transition Measure - 3 items) - English                            | Bakshi <sup>21</sup>              | 26            | fair                          | not assessed      | poor                       | not assessed              | fair                         | fair                        | not assessed                     | poor                        | not assessed            |
| 29. | Caregivers' Satisfaction with Stroke Care Questionnaire: C-SASC | Caregivers' Satisfaction with Stroke Care Questionnaire: C-SASC hospital scale | Cramm <sup>22</sup>               | 443           | good                          | not assessed      | not assessed               | not assessed              | good                         | not assessed                | poor                             | not assessed                | not assessed            |
| 30. | CARES observation tool (COT)                                    | CARES observation tool (COT)                                                   | Gaugler, J. E. <sup>23</sup>      | 143           | poor                          | not assessed      | not assessed               | excellent                 | not assessed                 | not assessed                | not assessed                     | not assessed                | not assessed            |
| 31. | CareWell in Hospital Questionnaire                              | CareWell in Hospital Questionnaire                                             | Bakker, F. C. <sup>24</sup>       | 24            | poor                          | fair              | not assessed               | fair                      | not assessed                 | poor                        | not assessed                     | not assessed                | poor                    |

|     | <b>Index Instrument<br/>(209 index instruments)</b>       | <b>Instrument Name and Version<br/>(379 validations studies)</b>                                          | <b>Reference Study<br/>(300 articles)</b> | <b>Study<br/>Code</b> | <b>Internal consistency<br/>score</b> | <b>Reliability score</b> | <b>Measurement error<br/>score</b> | <b>Content validity<br/>score</b> | <b>Structural validity<br/>score</b> | <b>Construct validity<br/>score</b> | <b>Cross-cultural<br/>validity score</b> | <b>Criterion validity<br/>score</b> | <b>Responsiveness<br/>score</b> |
|-----|-----------------------------------------------------------|-----------------------------------------------------------------------------------------------------------|-------------------------------------------|-----------------------|---------------------------------------|--------------------------|------------------------------------|-----------------------------------|--------------------------------------|-------------------------------------|------------------------------------------|-------------------------------------|---------------------------------|
| 32. | Caring Assessment Tool (CAT)                              | Caring Assessment Tool                                                                                    | Duffy, J. R. <sup>25</sup>                | 453                   | excellent                             | not assessed             | not assessed                       | excellent                         | excellent                            | not assessed                        | not assessed                             | not assessed                        | not assessed                    |
| 33. |                                                           | Caring Assessment Tool                                                                                    | Duffy <sup>26</sup>                       | 109                   | fair                                  | poor                     | not assessed                       | not assessed                      | not assessed                         | fair                                | not assessed                             | poor                                | not assessed                    |
| 34. | Case Management Quality Questionnaire (CMQQ)              | Case Management Quality Questionnaire (CMQQ)                                                              | Hadjistavropoulos, H. D. <sup>27</sup>    | 156                   | excellent                             | not assessed             | not assessed                       | excellent                         | excellent                            | not assessed                        | not assessed                             | not assessed                        | not assessed                    |
| 35. | Client Perception of Coordination Questionnaire (CPCQ)    | Client Perceptions Of Coordination Questionnaire (CPCQ)                                                   | McGuiness, C. <sup>28</sup>               | 250                   | good                                  | not assessed             | not assessed                       | good                              | good                                 | good                                | not assessed                             | not assessed                        | not assessed                    |
| 36. | Client-Centered Questionnaire                             | Client-Centred Care Questionnaire                                                                         | de Witte, L. <sup>29</sup>                | 101                   | excellent                             | not assessed             | not assessed                       | excellent                         | excellent                            | not assessed                        | not assessed                             | not assessed                        | not assessed                    |
| 37. | Client-Centered Rehabilitation Questionnaire              | Client-Centred Rehabilitation Questionnaire                                                               | Cott, C. A. <sup>30</sup>                 | 89                    | poor                                  | fair                     | not assessed                       | fair                              | poor                                 | fair                                | not assessed                             | not assessed                        | not assessed                    |
| 38. | Clinical Risk Monitoring Instrument                       | Clinical Risk Monitoring Instrument                                                                       | Briner, M. <sup>31</sup>                  | 59                    | not assessed                          | not assessed             | not assessed                       | excellent                         | not assessed                         | not assessed                        | not assessed                             | not assessed                        | not assessed                    |
| 39. | Clinician Support for Patient Activation Measure (CS-PAM) | Clinician Support for Patient Activation Measure (CS-PAM)                                                 | Hibbard, J. H. <sup>32</sup>              | 171                   | fair                                  | not assessed             | not assessed                       | not assessed                      | fair                                 | not assessed                        | not assessed                             | not assessed                        | not assessed                    |
| 40. | CollaboRATE                                               | CollaboRATE                                                                                               | Barr, P. J. <sup>33</sup>                 | 33                    | not assessed                          | fair                     | not assessed                       | not assessed                      | poor                                 | not assessed                        | not assessed                             | poor                                | poor                            |
| 41. |                                                           |                                                                                                           | Barr, P. J. <sup>33</sup>                 | 34                    | not assessed                          | fair                     | not assessed                       | not assessed                      | poor                                 | not assessed                        | not assessed                             | poor                                | poor                            |
| 42. |                                                           |                                                                                                           | Elwyn <sup>34</sup>                       | 457                   | not assessed                          | not assessed             | not assessed                       | excellent                         | not assessed                         | not assessed                        | not assessed                             | not assessed                        | not assessed                    |
| 43. | Collaboration And Satisfaction About Care Decisions       | Collaboration and Satisfaction About Care Decisions                                                       | Baggs <sup>35</sup>                       | 415                   | fair                                  | not assessed             | not assessed                       | excellent                         | fair                                 | fair                                | not assessed                             | not assessed                        | not assessed                    |
| 44. | Communication Assessment Instrument                       | Patient Communication Assessment Instrument                                                               | Wener <sup>36</sup>                       | 623                   | not assessed                          | not assessed             | not assessed                       | good                              | not assessed                         | not assessed                        | not assessed                             | not assessed                        | not assessed                    |
| 45. |                                                           | Patient Communication Assessment Instrument (PCAI)                                                        | Schonwetter <sup>37</sup>                 | 579                   | fair                                  | not assessed             | not assessed                       | not assessed                      | poor                                 | not assessed                        | not assessed                             | not assessed                        | not assessed                    |
| 46. |                                                           | Patient Communication Assessment Instrument (PCAI) and Student Communication Assessment Instrument (SCAI) | Winning <sup>38</sup>                     | 393                   | fair                                  | not assessed             | not assessed                       | not assessed                      | fair                                 | not assessed                        | not assessed                             | not assessed                        | not assessed                    |
| 47. |                                                           | Student Communication Assessment Instrument                                                               | Wener <sup>36</sup>                       | 622                   | not assessed                          | not assessed             | not assessed                       | good                              | not assessed                         | not assessed                        | not assessed                             | not assessed                        | not assessed                    |
| 48. |                                                           | Student Communication Assessment Instrument (SCAI)                                                        | Schonwetter <sup>37</sup>                 | 580                   | fair                                  | not assessed             | not assessed                       | not assessed                      | poor                                 | not assessed                        | not assessed                             | not assessed                        | not assessed                    |
| 49. | Components of Primary Care Index (CPCI)                   | (CPCI) Components of Primary Care Index                                                                   | Beaulieu, M. D. <sup>39</sup>             | 39                    | fair                                  | not assessed             | poor                               | excellent                         | fair                                 | poor                                | not assessed                             | not assessed                        | not assessed                    |
| 50. |                                                           | Components of Primary Care Index (CPCI)                                                                   | Flocke, S. A. <sup>40</sup>               | 130                   | fair                                  | not assessed             | not assessed                       | fair                              | not assessed                         | fair                                | not assessed                             | fair                                | not assessed                    |
| 51. |                                                           | Components of Primary Care Index (CPCI) Community Context                                                 | Haggerty, J. L. <sup>41</sup>             | 160                   | excellent                             | not assessed             | not assessed                       | excellent                         | excellent                            | not assessed                        | not assessed                             | not assessed                        | not assessed                    |
| 52. |                                                           | Components of Primary Care Index (CPCI) Comprehensive Care                                                | Haggerty, J. L. <sup>41</sup>             | 157                   | excellent                             | not assessed             | not assessed                       | excellent                         | excellent                            | not assessed                        | not assessed                             | not assessed                        | not assessed                    |
| 53. |                                                           | CPCI - Component of Primary Care Instrument                                                               | Haggerty <sup>42</sup>                    | 478                   | excellent                             | not assessed             | not assessed                       | not assessed                      | excellent                            | not assessed                        | not assessed                             | not assessed                        | not assessed                    |
| 54. |                                                           |                                                                                                           | Haggerty <sup>43</sup>                    | 484                   | excellent                             | not assessed             | not assessed                       | not assessed                      | excellent                            | not assessed                        | not assessed                             | not assessed                        | not assessed                    |
| 55. |                                                           | CPCI - Patient preference for regular physician                                                           | Burge <sup>44</sup>                       | 433                   | excellent                             | not assessed             | not assessed                       | excellent                         | excellent                            | good                                | not assessed                             | not assessed                        | not assessed                    |
| 56. | CONNECT                                                   | CONNECT-S (Spanish version of CONNECT)                                                                    | Chavez, L. M. <sup>45</sup>               | 75                    | poor                                  | good                     | not assessed                       | excellent                         | not assessed                         | poor                                | poor                                     | not assessed                        | not assessed                    |
| 57. |                                                           | Measure of continuity of care (CONNECT)                                                                   | Ware, N. C. <sup>46</sup>                 | 382                   | poor                                  | fair                     | not assessed                       | good                              | not assessed                         | fair                                | not assessed                             | not assessed                        | not assessed                    |
| 58. | Consultation and Relational Empathy (CARE) measure        | Consultation and Relational Empathy (CARE) Measure - Chinese                                              | Fung, C. S. <sup>47</sup>                 | 139                   | excellent                             | not assessed             | not assessed                       | excellent                         | excellent                            | good                                | good                                     | not assessed                        | not assessed                    |
| 59. |                                                           | Consultation and relational empathy (CARE) measure                                                        | Mercer <sup>48</sup>                      | 550                   | poor                                  | not assessed             | not assessed                       | excellent                         | not assessed                         | poor                                | not assessed                             | not assessed                        | not assessed                    |
| 60. |                                                           |                                                                                                           | Mercer <sup>49</sup>                      | 551                   | fair                                  | not assessed             | not assessed                       | not assessed                      | fair                                 | fair                                | not assessed                             | not assessed                        | not assessed                    |
| 61. |                                                           |                                                                                                           | Mercer <sup>50</sup>                      | 552                   | poor                                  | not assessed             | not assessed                       | not assessed                      | excellent                            | good                                | not assessed                             | not assessed                        | not assessed                    |
| 62. |                                                           |                                                                                                           | Mercer SW <sup>51</sup>                   | 553                   | poor                                  | good                     | not assessed                       | not assessed                      | good                                 | fair                                | not assessed                             | not assessed                        | not assessed                    |
| 63. | Consumer Assessment of Behavioral Health Survey (CABHS)   | Consumer Assessment of Behavioral Health Survey (CABHS)                                                   | Eisen <sup>52</sup>                       | 455                   | excellent                             | not assessed             | not assessed                       | excellent                         | excellent                            | not assessed                        | not assessed                             | excellent                           | not assessed                    |

|     | <b>Index Instrument<br/>(209 index instruments)</b>            | <b>Instrument Name and Version<br/>(379 validations studies)</b>                       | <b>Reference Study<br/>(300 articles)</b> | <b>Study<br/>Code</b> | <b>Internal consistency<br/>score</b> | <b>Reliability score</b> | <b>Measurement error<br/>score</b> | <b>Content validity<br/>score</b> | <b>Structural validity<br/>score</b> | <b>Construct validity<br/>score</b> | <b>Cross-cultural<br/>validity score</b> | <b>Criterion validity<br/>score</b> | <b>Responsiveness<br/>score</b> |
|-----|----------------------------------------------------------------|----------------------------------------------------------------------------------------|-------------------------------------------|-----------------------|---------------------------------------|--------------------------|------------------------------------|-----------------------------------|--------------------------------------|-------------------------------------|------------------------------------------|-------------------------------------|---------------------------------|
| 64. | Consumer Assessment of Health Plans Survey (CAHPS)             | CAHPS - Dutch Version of the Hospital-Level Consumer Assessment of Health Plans Survey | Arah <sup>53</sup>                        | 412                   | good                                  | not assessed             | not assessed                       | excellent                         | good                                 | not assessed                        | poor                                     | not assessed                        | not assessed                    |
| 65. |                                                                | CAHPS PCMH Survey                                                                      | Scholle, S. H. <sup>54</sup>              | 310                   | fair                                  | poor                     | not assessed                       | good                              | good                                 | not assessed                        | not assessed                             | not assessed                        | not assessed                    |
| 66. |                                                                |                                                                                        | Scholle, S. H. <sup>54</sup>              | 311                   | fair                                  | poor                     | not assessed                       | good                              | good                                 | not assessed                        | not assessed                             | not assessed                        | not assessed                    |
| 67. |                                                                | CAHPS-CG Child Primary Care Version Beta                                               | Gallagher <sup>55</sup>                   | 463                   | poor                                  | not assessed             | not assessed                       | excellent                         | good                                 | not assessed                        | fair                                     | not assessed                        | not assessed                    |
| 68. |                                                                | Consumer Assessment of Health 2.0 Plans Study (Adult Core Survey)                      | Hargraves <sup>56</sup>                   | 492                   | excellent                             | not assessed             | not assessed                       | excellent                         | excellent                            | not assessed                        | not assessed                             | not assessed                        | not assessed                    |
| 69. |                                                                | Consumer Assessment of Health Plans Study CAHPS 1.0                                    | Hays <sup>57</sup>                        | 497                   | fair                                  | not assessed             | not assessed                       | excellent                         | good                                 | not assessed                        | not assessed                             | not assessed                        | not assessed                    |
| 70. |                                                                |                                                                                        | Hays <sup>57</sup>                        | 498                   | fair                                  | not assessed             | not assessed                       | excellent                         | good                                 | not assessed                        | not assessed                             | not assessed                        | not assessed                    |
| 71. |                                                                |                                                                                        | Hays <sup>57</sup>                        | 499                   | fair                                  | not assessed             | not assessed                       | excellent                         | good                                 | not assessed                        | not assessed                             | not assessed                        | not assessed                    |
| 72. |                                                                |                                                                                        | Hays <sup>57</sup>                        | 500                   | fair                                  | not assessed             | not assessed                       | excellent                         | good                                 | not assessed                        | not assessed                             | not assessed                        | not assessed                    |
| 73. |                                                                | Consumer Assessment of Health Plans Study (CAHPS) For Medical Groups - G-CAHPS         | Solomon <sup>58</sup>                     | 594                   | fair                                  | fair                     | not assessed                       | excellent                         | fair                                 | fair                                | not assessed                             | not assessed                        | not assessed                    |
| 74. |                                                                |                                                                                        | Solomon <sup>58</sup>                     | 595                   | fair                                  | fair                     | not assessed                       | excellent                         | fair                                 | fair                                | not assessed                             | not assessed                        | not assessed                    |
| 75. | Consumer Perceptions of Care (CPC)                             | Consumer Perceptions of Care (CPC)                                                     | Clark, C. <sup>59</sup>                   | 79                    | excellent                             | good                     | not assessed                       | excellent                         | excellent                            | not assessed                        | not assessed                             | good                                | not assessed                    |
| 76. | Consumer Quality Index (CQI)                                   | Consumer Quality Index (CQI) – Consultation quality                                    | Howie <sup>60</sup>                       | 509                   | poor                                  | not assessed             | not assessed                       | excellent                         | poor                                 | not assessed                        | not assessed                             | not assessed                        | not assessed                    |
| 77. |                                                                | Consumer Quality Index (CQI) Breast Care instrument                                    | Damman, O. C. <sup>61</sup>               | 97                    | excellent                             | not assessed             | not assessed                       | excellent                         | not assessed                         | not assessed                        | not assessed                             | not assessed                        | not assessed                    |
| 78. |                                                                | Consumer Quality Index (CQI) Continuum of Care                                         | Berendsen, A. J. <sup>62</sup>            | 46                    | excellent                             | not assessed             | not assessed                       | excellent                         | excellent                            | poor                                | not assessed                             | not assessed                        | not assessed                    |
| 79. |                                                                | Consumer Quality Index (CQI) Long-term Care                                            | Triemstra <sup>63</sup>                   | 614                   | fair                                  | not assessed             | not assessed                       | not assessed                      | fair                                 | not assessed                        | not assessed                             | not assessed                        | not assessed                    |
| 80. |                                                                |                                                                                        | Triemstra <sup>63</sup>                   | 615                   | fair                                  | not assessed             | not assessed                       | not assessed                      | fair                                 | not assessed                        | not assessed                             | not assessed                        | not assessed                    |
| 81. |                                                                |                                                                                        | Triemstra <sup>63</sup>                   | 616                   | fair                                  | not assessed             | not assessed                       | not assessed                      | fair                                 | not assessed                        | not assessed                             | not assessed                        | not assessed                    |
| 82. |                                                                | Consumer Quality Index Care (CA)                                                       | Booij, J. C. <sup>64</sup>                | 56                    | fair                                  | not assessed             | not assessed                       | not assessed                      | fair                                 | not assessed                        | not assessed                             | not assessed                        | not assessed                    |
| 83. |                                                                |                                                                                        | Booij, J. C. <sup>64</sup>                | 57                    | poor                                  | not assessed             | not assessed                       | not assessed                      | fair                                 | not assessed                        | not assessed                             | not assessed                        | not assessed                    |
| 84. |                                                                | Consumer Quality Index Cataract Questionnaire (CQI Cataract)                           | Stubbe <sup>65</sup>                      | 600                   | excellent                             | good                     | not assessed                       | not assessed                      | excellent                            | good                                | not assessed                             | not assessed                        | not assessed                    |
| 85. |                                                                | Dutch Consumer Quality Index Hip Knee Questionnaire (CQI Hip Knee)                     | Stubbe <sup>66</sup>                      | 601                   | excellent                             | good                     | not assessed                       | not assessed                      | excellent                            | good                                | not assessed                             | not assessed                        | not assessed                    |
| 86. | Continuity of Care - User Measure (CONTINUUM)                  | CONTINU-UM (CONTINUity of care – User Measure)                                         | Sweeney, A. <sup>67</sup>                 | 352                   | excellent                             | not assessed             | not assessed                       | not assessed                      | excellent                            | good                                | not assessed                             | not assessed                        | not assessed                    |
| 87. |                                                                | CONTINUUM (CONTINUity of Care – User Measure)                                          | Rose, D. <sup>68</sup>                    | 297                   | not assessed                          | fair                     | not assessed                       | fair                              | not assessed                         | poor                                | not assessed                             | not assessed                        | not assessed                    |
| 88. | Continuity of Care in Children's Mental Health (C3MH)          | Continuity of Care in Children's Mental Health (C3MH) - Y                              | Tobon, J. I. <sup>69</sup>                | 358                   | excellent                             | not assessed             | not assessed                       | excellent                         | poor                                 | excellent                           | not assessed                             | good                                | not assessed                    |
| 89. |                                                                | Continuity of Care in Children's Mental Health (C3MH) - P                              | Tobon, J. I. <sup>69</sup>                | 357                   | excellent                             | good                     | not assessed                       | excellent                         | poor                                 | excellent                           | not assessed                             | good                                | not assessed                    |
| 90. | Continuity of Care Measure (CCM)                               | Continuity of Care Measure                                                             | Haggerty, J. L. <sup>70</sup>             | 162                   | poor                                  | not assessed             | not assessed                       | not assessed                      | excellent                            | poor                                | not assessed                             | not assessed                        | poor                            |
| 91. | Continuity of Care Practices Survey                            | Continuity of Care Practices Survey -Individual Level (CCPS-I)                         | Schaefer, J. A. <sup>71</sup>             | 307                   | poor                                  | not assessed             | not assessed                       | good                              | not assessed                         | fair                                | not assessed                             | not assessed                        | not assessed                    |
| 92. |                                                                | Continuity of Care Practices Survey -Program Level (CCPS-P)                            | Schaefer, J. A. <sup>71</sup>             | 308                   | poor                                  | not assessed             | not assessed                       | good                              | not assessed                         | fair                                | not assessed                             | not assessed                        | not assessed                    |
| 93. | Coordination of Handoff Effectiveness Questionnaire (CHEQ)     | Coordination of Handoff Effectiveness Questionnaire (CHEQ)                             | Block, M. <sup>72</sup>                   | 54                    | poor                                  | not assessed             | not assessed                       | excellent                         | not assessed                         | not assessed                        | not assessed                             | not assessed                        | fair                            |
| 94. | CPSO Peer Assessment                                           | CPSO'S Peer Assessment                                                                 | Wenghofer, E. F. <sup>73</sup>            | 386                   | fair                                  | not assessed             | not assessed                       | excellent                         | fair                                 | fair                                | not assessed                             | not assessed                        | not assessed                    |
| 95. | Cuestionario Continuidad Asistencial Entre Niveles de Atención | Cuestionario Continuidad Asistencial Entre Niveles de                                  | Aller, M. B. <sup>74</sup>                | 10                    | excellent                             | not assessed             | not assessed                       | excellent                         | good                                 | good                                | not assessed                             | not assessed                        | not assessed                    |

|      | <b>Index Instrument<br/>(209 index instruments)</b>           | <b>Instrument Name and Version<br/>(379 validations studies)</b>                                    | <b>Reference Study<br/>(300 articles)</b>  | <b>Study<br/>Code</b> | <b>Internal consistency<br/>score</b> | <b>Reliability score</b> | <b>Measurement error<br/>score</b> | <b>Content validity<br/>score</b> | <b>Structural validity<br/>score</b> | <b>Construct validity<br/>score</b> | <b>Cross-cultural<br/>validity score</b> | <b>Criterion validity<br/>score</b> | <b>Responsiveness<br/>score</b> |
|------|---------------------------------------------------------------|-----------------------------------------------------------------------------------------------------|--------------------------------------------|-----------------------|---------------------------------------|--------------------------|------------------------------------|-----------------------------------|--------------------------------------|-------------------------------------|------------------------------------------|-------------------------------------|---------------------------------|
|      | (CCAENA)                                                      | Atención (CCAENA)                                                                                   |                                            |                       |                                       |                          |                                    |                                   |                                      |                                     |                                          |                                     |                                 |
| 96.  | Cultural competence assessment instrument                     | Cultural Competence Assessment Instrument (CCA)                                                     | Doorenbos <sup>75</sup>                    | 452                   | good                                  | good                     | not assessed                       | excellent                         | good                                 | good                                | not assessed                             | not assessed                        | not assessed                    |
| 97.  | DELTA service user assessment                                 | DELTA service user Assessment                                                                       | Ahgren, B. <sup>76</sup>                   | 7                     | poor                                  | not assessed             | not assessed                       | fair                              | poor                                 | not assessed                        | not assessed                             | not assessed                        | not assessed                    |
| 98.  | Diabetes Continuity of Care Scale (DCCS)                      | Diabetes Continuity of Care Scale (DCCS)                                                            | Dolovich, L. R. <sup>77</sup>              | 107                   | poor                                  | fair                     | not assessed                       | excellent                         | poor                                 | fair                                | not assessed                             | not assessed                        | not assessed                    |
| 99.  | Distrust of the healthcare system (DHS)                       | Distrust of the healthcare system (DHS)                                                             | Katapodi <sup>78</sup>                     | 514                   | excellent                             | not assessed             | not assessed                       | not assessed                      | not assessed                         | good                                | not assessed                             | not assessed                        | not assessed                    |
| 100. | Doctor-Patient Scale                                          | Doctor-Centred, Disease-Oriented Attitude/ Patient-Centred, Problem-Oriented Attitude (DP scale)    | de Monchy <sup>79</sup>                    | 449                   | good                                  | not assessed             | not assessed                       | excellent                         | poor                                 | good                                | not assessed                             | not assessed                        | not assessed                    |
| 101. | Dual Diagnosis Capability in Healthcare Settings (DDCHCS)     | Dual Diagnosis Capability In Healthcare Settings (DDCHCS)                                           | McGovern, M. P. <sup>80</sup>              | 249                   | poor                                  | poor                     | not assessed                       | not assessed                      | not assessed                         | not assessed                        | not assessed                             | not assessed                        | not assessed                    |
| 102. | Embedded Patient-Centered Care Scale                          | Embedded Patient-Centered Care Scale                                                                | Wilkerson, L. <sup>81</sup>                | 392                   | poor                                  | not assessed             | not assessed                       | fair                              | not assessed                         | fair                                | not assessed                             | not assessed                        | not assessed                    |
| 103. | ENDOCARE questionnaire (ECQ)                                  | ENDOCARE questionnaire (ECQ)                                                                        | Dancet, E. A. <sup>82</sup>                | 98                    | fair                                  | not assessed             | not assessed                       | fair                              | fair                                 | not assessed                        | fair                                     | not assessed                        | not assessed                    |
| 104. | EUROPEP                                                       | EUROPEP                                                                                             | Haggerty <sup>42</sup>                     | 479                   | excellent                             | not assessed             | not assessed                       | not assessed                      | excellent                            | not assessed                        | not assessed                             | not assessed                        | not assessed                    |
| 105. |                                                               |                                                                                                     | Haggerty <sup>83</sup>                     | 488                   | excellent                             | not assessed             | not assessed                       | not assessed                      | excellent                            | not assessed                        | not assessed                             | not assessed                        | not assessed                    |
| 106. |                                                               | EUROPEP-I clinical behavior                                                                         | Beaulieu, M. D. <sup>39</sup>              | 41                    | fair                                  | not assessed             | poor                               | excellent                         | fair                                 | poor                                | not assessed                             | not assessed                        | not assessed                    |
| 107. | Experienced continuity of care for diabetes mellitus (ECC-DM) | Experienced Continuity Of Care for diabetes mellitus (ECC-DM)                                       | Gulliford, M. C. <sup>84</sup>             | 153                   | excellent                             | good                     | poor                               | not assessed                      | good                                 | not assessed                        | not assessed                             | good                                | not assessed                    |
| 108. | Facilitation of Patient Involvement Scale (FPI)               | Facilitation of Patient Involvement Scale (FPI)                                                     | Martin <sup>85</sup>                       | 534                   | poor                                  | not assessed             | not assessed                       | excellent                         | not assessed                         | fair                                | not assessed                             | not assessed                        | not assessed                    |
| 109. |                                                               |                                                                                                     | Martin <sup>85</sup>                       | 535                   | poor                                  | not assessed             | not assessed                       | excellent                         | not assessed                         | fair                                | not assessed                             | not assessed                        | not assessed                    |
| 110. |                                                               |                                                                                                     | Martin <sup>85</sup>                       | 536                   | poor                                  | poor                     | not assessed                       | excellent                         | not assessed                         | fair                                | not assessed                             | not assessed                        | not assessed                    |
| 111. |                                                               |                                                                                                     | Martin <sup>85</sup>                       | 537                   | poor                                  | poor                     | not assessed                       | excellent                         | not assessed                         | fair                                | not assessed                             | not assessed                        | not assessed                    |
| 112. | Family Assessment of Treatment at End of Life                 | Family Assessment of Treatment at End of Life                                                       | Casarett <sup>86</sup>                     | 435                   | good                                  | not assessed             | not assessed                       | excellent                         | excellent                            | good                                | not assessed                             | good                                | not assessed                    |
| 113. | Family perceived involvement (F-INVOKE)                       | Family Perceived Involvement (F-INVOKE)                                                             | Reid <sup>87</sup>                         | 570                   | fair                                  | fair                     | not assessed                       | good                              | fair                                 | fair                                | not assessed                             | not assessed                        | not assessed                    |
| 114. | Four Habits Coding Scheme (4HCS)                              | Four Habits Coding Scheme (4HCS)                                                                    | Clayton, M. F. <sup>88</sup>               | 82                    | not assessed                          | fair                     | not assessed                       | not assessed                      | poor                                 | not assessed                        | not assessed                             | not assessed                        | not assessed                    |
| 115. |                                                               |                                                                                                     | Krupat <sup>89</sup>                       | 521                   | poor                                  | fair                     | not assessed                       | not assessed                      | not assessed                         | fair                                | not assessed                             | not assessed                        | not assessed                    |
| 116. | General Practice Assessment Questionnaire (GPAQ)              | General Practice Assessment Questionnaire (GPAQ)                                                    | Jaturapatporn, D. <sup>90</sup>            | 200                   | fair                                  | not assessed             | not assessed                       | fair                              | fair                                 | not assessed                        | fair                                     | not assessed                        | not assessed                    |
| 117. |                                                               | General Practice Assessment Questionnaire (GPAQ) - Postal Version                                   | Mead <sup>91</sup>                         | 546                   | good                                  | not assessed             | not assessed                       | excellent                         | excellent                            | not assessed                        | not assessed                             | not assessed                        | not assessed                    |
| 118. |                                                               | General Practice Assessment Questionnaire (GPAQ)- Post Consultation Version                         | Mead <sup>91</sup>                         | 545                   | good                                  | not assessed             | not assessed                       | excellent                         | excellent                            | not assessed                        | not assessed                             | not assessed                        | not assessed                    |
| 119. | New Zealand General Practice Assessment Questionnaire         | New Zealand General Practice Assessment Questionnaire (NZGPAQ)                                      | Zwier, G. <sup>92</sup>                    | 406                   | poor                                  | fair                     | not assessed                       | not assessed                      | not assessed                         | fair                                | not assessed                             | not assessed                        | not assessed                    |
| 120. | General Practice Assessment Survey (GPAS)                     | General Practice Assessment Survey (GPAS)                                                           | Jayasinghe, U. W. <sup>93</sup>            | 202                   | excellent                             | not assessed             | poor                               | excellent                         | excellent                            | not assessed                        | not assessed                             | poor                                | not assessed                    |
| 121. |                                                               |                                                                                                     | Bower <sup>94</sup>                        | 428                   | not assessed                          | not assessed             | not assessed                       | excellent                         | good                                 | good                                | not assessed                             | not assessed                        | not assessed                    |
| 122. |                                                               | General Practice Assessment Survey (GPAS)                                                           | Ramsay, J. <sup>95</sup>                   | 293                   | poor                                  | poor                     | not assessed                       | not assessed                      | not assessed                         | fair                                | not assessed                             | not assessed                        | not assessed                    |
| 123. | General practice clinical linkages interviews (GPC-LI)^       | General practice clinical linkages interviews (GPC-LI)                                              | Amoroso, C. <sup>96</sup>                  | 11                    | fair                                  | poor                     | poor                               | not assessed                      | fair                                 | fair                                | not assessed                             | not assessed                        | not assessed                    |
| 124. | General Practice Patient Survey                               | The General Practice Patient Survey                                                                 | Lyratzopoulos, G. <sup>97</sup>            | 240                   | poor                                  | fair                     | not assessed                       | poor                              | not assessed                         | not assessed                        | not assessed                             | not assessed                        | not assessed                    |
| 125. | Geriatric Care Environment Scale (GCES)                       | Geriatric Care Environment Scale (GCES)/ Avaliacao do Perfil Geriátrico Institucional <sup>98</sup> | Paulo de Almeida Tavares, J. <sup>98</sup> | 282                   | fair                                  | not assessed             | not assessed                       | not assessed                      | fair                                 | fair                                | poor                                     | not assessed                        | not assessed                    |
| 126. |                                                               | Geriatric Care Environment Scale (GCES)                                                             | Kim, H. <sup>99</sup>                      | 214                   | fair                                  | not assessed             | not assessed                       | fair                              | poor                                 | not assessed                        | not assessed                             | not assessed                        | not assessed                    |

|      | <b>Index Instrument<br/>(209 index instruments)</b> | <b>Instrument Name and Version<br/>(379 validations studies)</b>                                                                                                                                                            | <b>Reference Study<br/>(300 articles)</b> | <b>Study<br/>Code</b> | <b>Internal consistency<br/>score</b> | <b>Reliability score</b> | <b>Measurement error<br/>score</b> | <b>Content validity<br/>score</b> | <b>Structural validity<br/>score</b> | <b>Construct validity<br/>score</b> | <b>Cross-cultural<br/>validity score</b> | <b>Criterion validity<br/>score</b> | <b>Responsiveness<br/>score</b> |
|------|-----------------------------------------------------|-----------------------------------------------------------------------------------------------------------------------------------------------------------------------------------------------------------------------------|-------------------------------------------|-----------------------|---------------------------------------|--------------------------|------------------------------------|-----------------------------------|--------------------------------------|-------------------------------------|------------------------------------------|-------------------------------------|---------------------------------|
| 127. | Giving Youth a Voice questionnaire (GYV)            | Giving Youth a Voice (GYV) questionnaire                                                                                                                                                                                    | Gan, C. <sup>100</sup>                    | 142                   | poor                                  | fair                     | not assessed                       | excellent                         | not assessed                         | fair                                | not assessed                             | not assessed                        | not assessed                    |
| 128. | Group-Based Medical Mistrust Scale (GBMMS)          | Group-Based Medical Mistrust Scale (GBMMS)                                                                                                                                                                                  | Thompson <sup>101</sup>                   | 612                   | fair                                  | not assessed             | not assessed                       | not assessed                      | fair                                 | fair                                | not assessed                             | not assessed                        | not assessed                    |
| 129. | Handoff clinical evaluation exercise (CEX)          | Handoff CEX (clinical evaluation exercise) - handoff provider                                                                                                                                                               | Horwitz, L. I. <sup>102</sup>             | 185                   | fair                                  | poor                     | not assessed                       | excellent                         | not assessed                         | not assessed                        | not assessed                             | not assessed                        | not assessed                    |
| 130. |                                                     |                                                                                                                                                                                                                             | Horwitz, L. I. <sup>103</sup>             | 187                   | fair                                  | poor                     | not assessed                       | excellent                         | not assessed                         | not assessed                        | not assessed                             | not assessed                        | not assessed                    |
| 131. |                                                     | Handoff CEX (clinical evaluation exercise) - handoff recipient                                                                                                                                                              | Horwitz, L. I. <sup>102</sup>             | 186                   | fair                                  | poor                     | not assessed                       | excellent                         | not assessed                         | not assessed                        | not assessed                             | not assessed                        | not assessed                    |
| 132. |                                                     |                                                                                                                                                                                                                             | Horwitz, L. I. <sup>103</sup>             | 188                   | fair                                  | poor                     | not assessed                       | excellent                         | not assessed                         | not assessed                        | not assessed                             | not assessed                        | not assessed                    |
| 133. | Handover Performance Tool (HPT)                     | Hand Over Performance Tool (HPT)                                                                                                                                                                                            | Pezzolesi, C. <sup>104</sup>              | 287                   | fair                                  | fair                     | not assessed                       | fair                              | fair                                 | fair                                | not assessed                             | not assessed                        | not assessed                    |
| 134. | Health Care Climate Questionnaire (HCCQ)            | Health Care Climate Questionnaire (HCCQ)                                                                                                                                                                                    | Fiscella <sup>105</sup>                   | 459                   | good                                  | not assessed             | not assessed                       | excellent                         | not assessed                         | good                                | not assessed                             | not assessed                        | not assessed                    |
| 135. | Health Care Communication Questionnaire (HCCQ)      | Health Care Communication Questionnaire (HCCQ)                                                                                                                                                                              | Gremigni, P. <sup>106</sup>               | 150                   | fair                                  | not assessed             | poor                               | excellent                         | fair                                 | fair                                | not assessed                             | not assessed                        | not assessed                    |
| 136. | Health Care relationship (HCR) Trust Scale          | Health Care Relationship (HCR) Trust Scale                                                                                                                                                                                  | Bova <sup>107</sup>                       | 427                   | excellent                             | good                     | not assessed                       | excellent                         | excellent                            | not assessed                        | not assessed                             | not assessed                        | not assessed                    |
| 137. | Health Care System Distrust Scale                   | Health Care System Distrust Scale                                                                                                                                                                                           | Rose <sup>108</sup>                       | 575                   | excellent                             | not assessed             | not assessed                       | excellent                         | excellent                            | good                                | not assessed                             | good                                | not assessed                    |
| 138. | Heart Continuity of Care Questionnaire (HCCQ)       | HCCQ (Heart Continuity Of Care Questionnaire)                                                                                                                                                                               | Kowalyk, K. M. <sup>109</sup>             | 223                   | poor                                  | not assessed             | not assessed                       | poor                              | not assessed                         | fair                                | not assessed                             | fair                                | not assessed                    |
| 139. |                                                     | Heart Continuity of Care Questionnaire                                                                                                                                                                                      | Hadjistavropoulos, H. D. <sup>110</sup>   | 155                   | excellent                             | not assessed             | not assessed                       | not assessed                      | excellent                            | fair                                | not assessed                             | not assessed                        | not assessed                    |
| 140. | Helping Alliance Questionnaire (HAQ)                | Helping Alliance Questionnaire                                                                                                                                                                                              | Bale <sup>111</sup>                       | 420                   | fair                                  | not assessed             | not assessed                       | not assessed                      | poor                                 | good                                | not assessed                             | not assessed                        | not assessed                    |
| 141. |                                                     | Helping Alliance Questionnaire (HAQ)                                                                                                                                                                                        | De Weert-Van Oene <sup>112</sup>          | 450                   | good                                  | not assessed             | not assessed                       | excellent                         | good                                 | good                                | poor                                     | not assessed                        | not assessed                    |
| 142. | Hospital Survey of Patient Safety Culture (HSOPSC)  | Hospital Survey Of Patient Safety Culture (HSOPSC)- Chinese Version                                                                                                                                                         | Nie, Y. <sup>113</sup>                    | 265                   | good                                  | not assessed             | not assessed                       | not assessed                      | good                                 | not assessed                        | poor                                     | not assessed                        | not assessed                    |
| 143. | Human Service integration Measure                   | Human Service integration Measure                                                                                                                                                                                           | Browne, G. <sup>114</sup>                 | 61                    | not assessed                          | not assessed             | not assessed                       | excellent                         | poor                                 | poor                                | not assessed                             | poor                                | not assessed                    |
| 144. | Hybrid tool from 3 questionnaires                   | Combination of items from 3 questionnaires: Camberwell Assessment of Need; Scale to Assess Therapeutic Relationships in Community Mental Health Care – service user version; Continuity of care – User Measure (CONTINU-UM) | Burns, T. <sup>115</sup>                  | 65                    | fair                                  | not assessed             | not assessed                       | good                              | fair                                 | not assessed                        | not assessed                             | not assessed                        | not assessed                    |
| 145. | Index of GP integration (GP questionnaire)          | Index of GP integration (GP questionnaire)                                                                                                                                                                                  | Batterham, R. <sup>116</sup>              | 36                    | excellent                             | not assessed             | not assessed                       | excellent                         | excellent                            | poor                                | not assessed                             | not assessed                        | not assessed                    |
| 146. | Individualized Care Instrument (ICI)                | ICI - Individualized Care Instrument                                                                                                                                                                                        | Charalambous, A. <sup>117</sup>           | 73                    | poor                                  | not assessed             | not assessed                       | not assessed                      | poor                                 | poor                                | poor                                     | not assessed                        | not assessed                    |
| 147. | Individualized Care Inventory                       | Individualized Care Inventory (ICI)                                                                                                                                                                                         | O'Rourke <sup>118</sup>                   | 563                   | fair                                  | not assessed             | not assessed                       | not assessed                      | fair                                 | not assessed                        | not assessed                             | not assessed                        | not assessed                    |
| 148. |                                                     |                                                                                                                                                                                                                             | O'Rourke <sup>118</sup>                   | 564                   | fair                                  | not assessed             | not assessed                       | not assessed                      | fair                                 | not assessed                        | not assessed                             | not assessed                        | not assessed                    |
| 149. | Individualized Care Scale (ICS)                     | ICS - Individualized Care Scale                                                                                                                                                                                             | Charalambous, A. <sup>117</sup>           | 74                    | poor                                  | not assessed             | not assessed                       | not assessed                      | poor                                 | poor                                | not assessed                             | not assessed                        | not assessed                    |
| 150. |                                                     | Individualized Care Scale - Nurse (ICS-Nurse)                                                                                                                                                                               | Suhonen, R. <sup>119</sup>                | 348                   | good                                  | not assessed             | not assessed                       | excellent                         | fair                                 | fair                                | not assessed                             | not assessed                        | not assessed                    |
| 151. |                                                     | Individualized Care Scale (ICS)                                                                                                                                                                                             | Suhonen, R. <sup>120</sup>                | 350                   | fair                                  | fair                     | not assessed                       | excellent                         | fair                                 | fair                                | not assessed                             | not assessed                        | not assessed                    |
| 152. |                                                     |                                                                                                                                                                                                                             | Suhonen <sup>121</sup>                    | 602                   | good                                  | not assessed             | not assessed                       | not assessed                      | good                                 | not assessed                        | poor                                     | not assessed                        | not assessed                    |
| 153. |                                                     |                                                                                                                                                                                                                             | Suhonen <sup>121</sup>                    | 603                   | good                                  | not assessed             | not assessed                       | not assessed                      | good                                 | not assessed                        | poor                                     | not assessed                        | not assessed                    |
| 154. |                                                     |                                                                                                                                                                                                                             | Suhonen <sup>121</sup>                    | 604                   | good                                  | not assessed             | not assessed                       | not assessed                      | good                                 | not assessed                        | poor                                     | not assessed                        | not assessed                    |
| 155. |                                                     |                                                                                                                                                                                                                             | Suhonen <sup>121</sup>                    | 605                   | good                                  | not assessed             | not assessed                       | not assessed                      | good                                 | not assessed                        | poor                                     | not assessed                        | not assessed                    |
| 156. |                                                     |                                                                                                                                                                                                                             | Suhonen <sup>121</sup>                    | 606                   | fair                                  | not assessed             | not assessed                       | not assessed                      | poor                                 | not assessed                        | poor                                     | not assessed                        | not assessed                    |
| 157. |                                                     | Individualized Care Scale (ICS)                                                                                                                                                                                             | Petroz, U. <sup>122</sup>                 | 284                   | fair                                  | not assessed             | not assessed                       | not assessed                      | fair                                 | fair                                | poor                                     | not assessed                        | not assessed                    |

|      | <b>Index Instrument<br/>(209 index instruments)</b>     | <b>Instrument Name and Version<br/>(379 validations studies)</b>       | <b>Reference Study<br/>(300 articles)</b> | <b>Study<br/>Code</b> | <b>Internal consistency<br/>score</b> | <b>Reliability score</b> | <b>Measurement error<br/>score</b> | <b>Content validity<br/>score</b> | <b>Structural validity<br/>score</b> | <b>Construct validity<br/>score</b> | <b>Cross-cultural<br/>validity score</b> | <b>Criterion validity<br/>score</b> | <b>Responsiveness<br/>score</b> |
|------|---------------------------------------------------------|------------------------------------------------------------------------|-------------------------------------------|-----------------------|---------------------------------------|--------------------------|------------------------------------|-----------------------------------|--------------------------------------|-------------------------------------|------------------------------------------|-------------------------------------|---------------------------------|
| 158. | Inpatient-Treatment Alliance Scale (ITAS)               | Inpatient-Treatment Alliance Scale (ITAS)                              | Blais <sup>123</sup>                      | 425                   | fair                                  | fair                     | not assessed                       | excellent                         | fair                                 | not assessed                        | not assessed                             | not assessed                        | not assessed                    |
| 159. | Internal Participation Scale (IPS)                      | Internal Participation Scale                                           | Korner, M. <sup>124</sup>                 | 220                   | poor                                  | not assessed             | not assessed                       | not assessed                      | poor                                 | poor                                | not assessed                             | not assessed                        | not assessed                    |
| 160. |                                                         |                                                                        | Korner, M. <sup>124</sup>                 | 221                   | poor                                  | not assessed             | not assessed                       | not assessed                      | poor                                 | poor                                | not assessed                             | not assessed                        | not assessed                    |
| 161. | Interpersonal Processes of Care version (IPC-II)        | (IPC-II) Interpersonal Processes of Care version                       | Beaulieu, M. D. <sup>39</sup>             | 40                    | fair                                  | not assessed             | poor                               | excellent                         | fair                                 | poor                                | not assessed                             | not assessed                        | not assessed                    |
| 162. |                                                         | IPC-II -Interpersonal processes of Care                                | Haggerty <sup>42</sup>                    | 480                   | excellent                             | not assessed             | not assessed                       | not assessed                      | excellent                            | not assessed                        | not assessed                             | not assessed                        | not assessed                    |
| 163. | Jefferson Scale of Physician Empathy                    | Jefferson Scale of Physician Empathy                                   | Hojat <sup>125</sup>                      | 508                   | good                                  | not assessed             | not assessed                       | excellent                         | good                                 | good                                | not assessed                             | good                                | not assessed                    |
| 164. | Jones Synergy Scale                                     | Jones synergy scale                                                    | Jones, J. <sup>126</sup>                  | 205                   | fair                                  | not assessed             | not assessed                       | fair                              | fair                                 | not assessed                        | not assessed                             | fair                                | not assessed                    |
| 165. | Kim Alliance Scale                                      | Kim Alliance Scale                                                     | Kim <sup>127</sup>                        | 517                   | good                                  | not assessed             | not assessed                       | excellent                         | good                                 | good                                | not assessed                             | not assessed                        | not assessed                    |
| 166. | Learners' Perceptions Survey—Primary Care (LPS-PC)      | Learners' Perceptions Survey—Primary Care (LPS-PC)                     | Byrne, J. M. <sup>128</sup>               | 66                    | not assessed                          | not assessed             | not assessed                       | excellent                         | poor                                 | not assessed                        | not assessed                             | not assessed                        | not assessed                    |
| 167. | Matched-pair instrument                                 | Matched-pair instrument                                                | Campbell <sup>129</sup>                   | 434                   | good                                  | not assessed             | poor                               | excellent                         | good                                 | not assessed                        | not assessed                             | not assessed                        | not assessed                    |
| 168. | Measure of Experienced Continuity of Care (MECC)        | Measure of Experienced Continuity of Care                              | King, M. <sup>130</sup>                   | 216                   | poor                                  | fair                     | not assessed                       | fair                              | not assessed                         | poor                                | not assessed                             | not assessed                        | not assessed                    |
| 169. | Measure of Patient-Centered Communication (MPCC)        | Measure of Patient-Centered Communication (MPCC) coding scheme         | Clayton, M. F. <sup>88</sup>              | 81                    | not assessed                          | fair                     | not assessed                       | not assessed                      | poor                                 | not assessed                        | not assessed                             | not assessed                        | not assessed                    |
| 170. | Measure of Processes of Care (MPOC)                     | Dutch Measure of Processes of Care (MPOC)-20                           | Siebes <sup>131</sup>                     | 591                   | good                                  | good                     | not assessed                       | not assessed                      | good                                 | good                                | poor                                     | not assessed                        | not assessed                    |
| 171. |                                                         | Measure of Process of Care (MPOC)                                      | King <sup>132</sup>                       | 519                   | fair                                  | fair                     | not assessed                       | good                              | fair                                 | good                                | not assessed                             | not assessed                        | not assessed                    |
| 172. |                                                         | Measure of Process of Care for Service Providers (MPOC-SP)             | Tang, H. N. <sup>133</sup>                | 353                   | fair                                  | not assessed             | not assessed                       | not assessed                      | fair                                 | fair                                | not assessed                             | not assessed                        | not assessed                    |
| 173. |                                                         | Measure of Processes of Care (MPOC-20)                                 | Himuro, N. <sup>134</sup>                 | 175                   | good                                  | good                     | not assessed                       | excellent                         | good                                 | not assessed                        | poor                                     | good                                | not assessed                    |
| 174. |                                                         | Measure Of Processes Of Care (MPOC-22) SA                              | Saloojee, G. M. <sup>135</sup>            | 304                   | fair                                  | fair                     | not assessed                       | fair                              | fair                                 | fair                                | poor                                     | not assessed                        | not assessed                    |
| 175. |                                                         | Measure of Processes of Care (MPOC-56)                                 | Himuro, N. <sup>134</sup>                 | 174                   | good                                  | good                     | not assessed                       | excellent                         | good                                 | not assessed                        | poor                                     | good                                | not assessed                    |
| 176. |                                                         | Measure of Processes of Care (MPOC)                                    | Bjerner, I. M. <sup>136</sup>             | 52                    | fair                                  | not assessed             | not assessed                       | not assessed                      | fair                                 | not assessed                        | poor                                     | not assessed                        | not assessed                    |
| 177. |                                                         |                                                                        | McConachie <sup>137</sup>                 | 538                   | fair                                  | not assessed             | not assessed                       | not assessed                      | fair                                 | fair                                | not assessed                             | not assessed                        | not assessed                    |
| 178. |                                                         |                                                                        | McConachie <sup>137</sup>                 | 539                   | fair                                  | not assessed             | not assessed                       | not assessed                      | fair                                 | fair                                | not assessed                             | not assessed                        | not assessed                    |
| 179. |                                                         |                                                                        | McConachie <sup>137</sup>                 | 540                   | fair                                  | not assessed             | not assessed                       | not assessed                      | fair                                 | fair                                | not assessed                             | not assessed                        | not assessed                    |
| 180. |                                                         |                                                                        | McConachie <sup>137</sup>                 | 541                   | fair                                  | not assessed             | not assessed                       | not assessed                      | fair                                 | fair                                | not assessed                             | not assessed                        | not assessed                    |
| 181. |                                                         |                                                                        | McConachie <sup>137</sup>                 | 542                   | fair                                  | not assessed             | not assessed                       | not assessed                      | fair                                 | fair                                | not assessed                             | not assessed                        | not assessed                    |
| 182. |                                                         | Measure of Processes of Care (MPOC)-20                                 | King <sup>138</sup>                       | 518                   | good                                  | good                     | not assessed                       | excellent                         | good                                 | good                                | not assessed                             | good                                | not assessed                    |
| 183. |                                                         | Measure of Processes of Care for Service Providers (MPOC-SP)           | Woodside <sup>139</sup>                   | 629                   | good                                  | good                     | not assessed                       | excellent                         | good                                 | good                                | not assessed                             | not assessed                        | not assessed                    |
| 184. |                                                         | MPOC-20                                                                | Klassen, A. F. <sup>140</sup>             | 217                   | excellent                             | not assessed             | not assessed                       | not assessed                      | excellent                            | good                                | not assessed                             | not assessed                        | not assessed                    |
| 185. | Measure of Trust in Insurers                            | A Measure of Trust in Insurers                                         | Goold <sup>141</sup>                      | 469                   | good                                  | not assessed             | not assessed                       | excellent                         | good                                 | good                                | not assessed                             | not assessed                        | not assessed                    |
| 186. | Measuring instrument for individualized care            | Measuring instrument for individualized care (for completion by staff) | Chappell <sup>142</sup>                   | 438                   | poor                                  | fair                     | not assessed                       | excellent                         | poor                                 | good                                | not assessed                             | not assessed                        | not assessed                    |
| 187. | Medical Care Questionnaire (MCQ)                        | Medical Care Questionnaire (MCQ)                                       | Harley, C. <sup>143</sup>                 | 167                   | excellent                             | not assessed             | not assessed                       | excellent                         | excellent                            | good                                | not assessed                             | not assessed                        | not assessed                    |
| 188. | Medical Communication Competence Scale                  | Medical Communication Competence Scale - MCCS                          | Cegala <sup>144</sup>                     | 437                   | good                                  | not assessed             | not assessed                       | excellent                         | good                                 | not assessed                        | not assessed                             | not assessed                        | not assessed                    |
| 189. | Medical Home Index (MHI)                                | Medical Home Index (MHI)                                               | Cooley, W. C. <sup>145</sup>              | 86                    | poor                                  | fair                     | not assessed                       | excellent                         | poor                                 | fair                                | not assessed                             | not assessed                        | not assessed                    |
| 190. | Mental Health Statistics Improvement Program (MHSIP)    | Mental Health Statistics Improvement Program (MHSIP)                   | Eisen <sup>52</sup>                       | 456                   | excellent                             | not assessed             | not assessed                       | excellent                         | excellent                            | not assessed                        | not assessed                             | excellent                           | not assessed                    |
| 191. | Multi-country Survey Study Responsiveness Questionnaire | Multi-Country Survey Study - Responsiveness Questionnaire              | Valentine, N. B. <sup>146</sup>           | 369                   | excellent                             | good                     | not assessed                       | excellent                         | excellent                            | good                                | poor                                     | not assessed                        | not assessed                    |

|      | <b>Index Instrument<br/>(209 index instruments)</b>              | <b>Instrument Name and Version<br/>(379 validations studies)</b>        | <b>Reference Study<br/>(300 articles)</b> | <b>Study<br/>Code</b> | <b>Internal consistency<br/>score</b> | <b>Reliability score</b> | <b>Measurement error<br/>score</b> | <b>Content validity<br/>score</b> | <b>Structural validity<br/>score</b> | <b>Construct validity<br/>score</b> | <b>Cross-cultural<br/>validity score</b> | <b>Criterion validity<br/>score</b> | <b>Responsiveness<br/>score</b> |
|------|------------------------------------------------------------------|-------------------------------------------------------------------------|-------------------------------------------|-----------------------|---------------------------------------|--------------------------|------------------------------------|-----------------------------------|--------------------------------------|-------------------------------------|------------------------------------------|-------------------------------------|---------------------------------|
| 192. | Multidimensional Trust in Health Care Systems Scale (MTHCSS)     | Multidimensional Trust in Health Care Systems Scale (MTHCSS)            | Egede, L. E. <sup>147</sup>               | 119                   | fair                                  | not assessed             | not assessed                       | excellent                         | fair                                 | fair                                | not assessed                             | not assessed                        | not assessed                    |
| 193. | National health and health services use questionnaire            | National Health And Health Services Use Questionnaire                   | Bentler, S. E. <sup>148</sup>             | 45                    | fair                                  | not assessed             | poor                               | not assessed                      | not assessed                         | fair                                | not assessed                             | fair                                | not assessed                    |
| 194. | Nijmegen Continuity Questionnaire (NCQ)                          | Nijmegen Continuity Questionnaire (NCQ)                                 | Uijen, A. A. <sup>149</sup>               | 366                   | good                                  | not assessed             | not assessed                       | good                              | good                                 | good                                | not assessed                             | not assessed                        | not assessed                    |
| 195. |                                                                  |                                                                         | Uijen, A. A. <sup>150</sup>               | 367                   | good                                  | good                     | not assessed                       | not assessed                      | excellent                            | good                                | not assessed                             | not assessed                        | not assessed                    |
| 196. | Nursing Practice Models Questionnaire                            | Nursing Practice Models Questionnaire (NPMQ)                            | Mueller, C. <sup>151</sup>                | 262                   | fair                                  | not assessed             | not assessed                       | fair                              | fair                                 | not assessed                        | not assessed                             | not assessed                        | not assessed                    |
| 197. | Observing patient involvement scale (OPTION)                     | OPTION (Observing Patient Involvement) scale                            | Elwyn, G. <sup>152</sup>                  | 121                   | good                                  | fair                     | not assessed                       | excellent                         | good                                 | good                                | not assessed                             | not assessed                        | not assessed                    |
| 198. | Oncology Patients' Perception of the Quality of Nursing Care     | Oncology Patients' Perceptions Of The Quality Of Nursing Care (OOPQNCs) | Radwin, L. <sup>153</sup>                 | 291                   | fair                                  | not assessed             | not assessed                       | poor                              | fair                                 | not assessed                        | not assessed                             | not assessed                        | not assessed                    |
| 199. | OutPatient Experiences Questionnaire (OPEQ)                      | OutPatient Experiences Questionnaire (OPEQ)                             | Garratt <sup>154</sup>                    | 465                   | excellent                             | good                     | not assessed                       | excellent                         | excellent                            | excellent                           | not assessed                             | not assessed                        | not assessed                    |
| 200. | Pain Care Quality (PainCQ)                                       | Pain CQ-I: Interdisciplinary Care Survey                                | Pett, M. A. <sup>155</sup>                | 285                   | fair                                  | not assessed             | not assessed                       | not assessed                      | fair                                 | fair                                | not assessed                             | not assessed                        | not assessed                    |
| 201. |                                                                  | Pain Care Quality (PainCQ)                                              | Beck <sup>156</sup>                       | 423                   | not assessed                          | not assessed             | not assessed                       | excellent                         | not assessed                         | not assessed                        | not assessed                             | not assessed                        | not assessed                    |
| 202. |                                                                  |                                                                         | Beck <sup>157</sup>                       | 424                   | good                                  | not assessed             | poor                               | excellent                         | good                                 | not assessed                        | not assessed                             | not assessed                        | not assessed                    |
| 203. |                                                                  | Pain CQ-N: Nursing Care Survey                                          | Pett, M. A. <sup>155</sup>                | 286                   | fair                                  | not assessed             | not assessed                       | not assessed                      | fair                                 | fair                                | not assessed                             | not assessed                        | not assessed                    |
| 204. | Parent's Perceptions of Primary Care measure (P3C)               | Parents' Perceptions of Primary Care measure (P3C)                      | Seid <sup>158</sup>                       | 581                   | good                                  | not assessed             | not assessed                       | excellent                         | good                                 | good                                | poor                                     | not assessed                        | not assessed                    |
| 205. | Parents' Perceptions of Continuity Scale (PPCS)                  | Parents' Perceptions of Continuity Scale (PPCS)                         | Epstein, E. G. <sup>159</sup>             | 122                   | poor                                  | not assessed             | not assessed                       | excellent                         | not assessed                         | good                                | not assessed                             | not assessed                        | not assessed                    |
| 206. | Patient Activation Measure (PAM)                                 | Patient Activation Measure                                              | Fowles, J. B. <sup>160</sup>              | 134                   | good                                  | poor                     | poor                               | not assessed                      | not assessed                         | fair                                | not assessed                             | not assessed                        | not assessed                    |
| 207. |                                                                  | Patient Activation Measure (13-item Short Form)                         | Hibbard <sup>161</sup>                    | 505                   | good                                  | not assessed             | poor                               | not assessed                      | good                                 | not assessed                        | not assessed                             | poor                                | not assessed                    |
| 208. |                                                                  | Patient Activation Measure (22-item original)                           | Hibbard <sup>162</sup>                    | 506                   | good                                  | not assessed             | good                               | excellent                         | good                                 | good                                | not assessed                             | good                                | not assessed                    |
| 209. |                                                                  | Patient Activation Measure (PAM)                                        | Skolasky, R. L. <sup>163</sup>            | 332                   | poor                                  | not assessed             | not assessed                       | not assessed                      | poor                                 | good                                | not assessed                             | not assessed                        | not assessed                    |
| 210. | Patient Acuity Case management Evaluation (PACE tool)            | PACE measurement tool (Patient Acuity Case management Evaluation)       | Balstad, A. <sup>164</sup>                | 29                    | not assessed                          | poor                     | not assessed                       | excellent                         | poor                                 | poor                                | not assessed                             | not assessed                        | not assessed                    |
| 211. | Patient Assessment of Chronic Illness Care (PACIC)               | Modified Patient Assessment of Chronic Illness Care (PACIC)             | Gugiu <sup>165</sup>                      | 473                   | excellent                             | not assessed             | not assessed                       | excellent                         | excellent                            | good                                | not assessed                             | not assessed                        | not assessed                    |
| 212. |                                                                  | modified version of the original 20-item PACIC                          | Gugiu, P. C. <sup>166</sup>               | 151                   | fair                                  | poor                     | not assessed                       | excellent                         | fair                                 | fair                                | not assessed                             | not assessed                        | not assessed                    |
| 213. |                                                                  | PACIC - Patient Assessment of Chronic Illness Care                      | Cramm, J. M. <sup>167</sup>               | 93                    | excellent                             | not assessed             | not assessed                       | not assessed                      | excellent                            | not assessed                        | not assessed                             | not assessed                        | poor                            |
| 214. |                                                                  | PACIC (Spanish)                                                         | Aragones <sup>168</sup>                   | 411                   | good                                  | good                     | fair                               | excellent                         | good                                 | not assessed                        | poor                                     | not assessed                        | not assessed                    |
| 215. |                                                                  | PACIC-S - Patient Assessment of Chronic Illness Care (short)            | Cramm, J. M. <sup>167</sup>               | 94                    | excellent                             | not assessed             | not assessed                       | not assessed                      | excellent                            | not assessed                        | not assessed                             | not assessed                        | poor                            |
| 216. |                                                                  | Patient Assessment of Chronic Illness Care (PACIC)                      | Glasgow, R. E. <sup>169</sup>             | 149                   | good                                  | good                     | not assessed                       | excellent                         | good                                 | good                                | not assessed                             | not assessed                        | not assessed                    |
| 217. |                                                                  | Patient Assessment Of Chronic Illness Care (PACIC)-5A                   | Rosemann, T. <sup>170</sup>               | 298                   | fair                                  | fair                     | not assessed                       | poor                              | fair                                 | fair                                | poor                                     | not assessed                        | not assessed                    |
| 218. |                                                                  | Patients Assessment Chronic Illness Care (PACIC)                        | Wensing <sup>171</sup>                    | 624                   | excellent                             | poor                     | not assessed                       | excellent                         | excellent                            | good                                | fair                                     | not assessed                        | not assessed                    |
| 219. | Patient Career Diary                                             | Patient Career Diary                                                    | Baker <sup>172</sup>                      | 418                   | good                                  | not assessed             | poor                               | excellent                         | good                                 | not assessed                        | not assessed                             | not assessed                        | not assessed                    |
| 220. | Patient Continuity of Care Questionnaire (PCCQ)                  | Patient Continuity of Care Questionnaire (PCCQ)                         | Hadjistavropoulos, H. <sup>173</sup>      | 154                   | good                                  | not assessed             | not assessed                       | not assessed                      | good                                 | good                                | not assessed                             | not assessed                        | not assessed                    |
| 221. | Patient Experiences Questionnaire (PEQ)                          | Patient experience questionnaire (PEQ)                                  | Steine <sup>174</sup>                     | 597                   | excellent                             | not assessed             | not assessed                       | excellent                         | excellent                            | good                                | not assessed                             | not assessed                        | not assessed                    |
| 222. |                                                                  | Patient Experiences Questionnaire (PEQ)                                 | Pettersen <sup>175</sup>                  | 565                   | excellent                             | good                     | not assessed                       | not assessed                      | excellent                            | good                                | not assessed                             | not assessed                        | not assessed                    |
| 223. | Patient Perception of Patient-Centeredness Questionnaire (PPPCQ) | Patient Perception of Patient-Centeredness Questionnaire                | Constand, M. K. <sup>176</sup>            | 85                    | poor                                  | poor                     | not assessed                       | not assessed                      | fair                                 | fair                                | not assessed                             | fair                                | fair                            |
| 224. | Patient Perceptions of Integrated Care Survey                    | Patient Perceptions of Integrated Care (PPIC) survey                    | Singer, S. J. <sup>177</sup>              | 330                   | fair                                  | not assessed             | not assessed                       | fair                              | fair                                 | fair                                | not assessed                             | not assessed                        | not assessed                    |
| 225. | Patient Reactions Assessment                                     | Patient Reactions Assessment                                            | Galassi <sup>178</sup>                    | 462                   | good                                  | not assessed             | not assessed                       | excellent                         | good                                 | good                                | not assessed                             | not assessed                        | not assessed                    |

|      | <b>Index Instrument<br/>(209 index instruments)</b>                                  | <b>Instrument Name and Version<br/>(379 validations studies)</b>                             | <b>Reference Study<br/>(300 articles)</b> | <b>Study<br/>Code</b> | <b>Internal consistency<br/>score</b> | <b>Reliability score</b> | <b>Measurement error<br/>score</b> | <b>Content validity<br/>score</b> | <b>Structural validity<br/>score</b> | <b>Construct validity<br/>score</b> | <b>Cross-cultural<br/>validity score</b> | <b>Criterion validity<br/>score</b> | <b>Responsiveness<br/>score</b> |
|------|--------------------------------------------------------------------------------------|----------------------------------------------------------------------------------------------|-------------------------------------------|-----------------------|---------------------------------------|--------------------------|------------------------------------|-----------------------------------|--------------------------------------|-------------------------------------|------------------------------------------|-------------------------------------|---------------------------------|
| 226. | Patient Responses to Nursing Behaviors (PRNB)                                        | Patient Responses To Nursing Behaviours (PRNB)                                               | Kemppainen, J. K. <sup>179</sup>          | 212                   | good                                  | not assessed             | not assessed                       | excellent                         | fair                                 | fair                                | not assessed                             | not assessed                        | not assessed                    |
| 227. | Patient trust in community pharmacists (TRUST-Ph)                                    | Patient Trust In Community Pharmacists (TRUST-Ph) scale                                      | Ngorsuraches <sup>180</sup>               | 559                   | good                                  | not assessed             | not assessed                       | excellent                         | good                                 | not assessed                        | not assessed                             | not assessed                        | not assessed                    |
| 228. |                                                                                      |                                                                                              | Ngorsuraches <sup>180</sup>               | 560                   | good                                  | not assessed             | not assessed                       | excellent                         | good                                 | good                                | not assessed                             | not assessed                        | not assessed                    |
| 229. | Patient-centered family-focused care (PCFFC)                                         | Patient-centered, family-focused care (PCFFC) measure                                        | Hannum Rose, J. <sup>181</sup>            | 164                   | excellent                             | not assessed             | poor                               | excellent                         | excellent                            | not assessed                        | not assessed                             | not assessed                        | not assessed                    |
| 230. | Patient-Centered Medical Home tool (PCMH)                                            | Patient-Centered Medical Home tool (PCMH)                                                    | Alexander, J. A. <sup>182</sup>           | 9                     | not assessed                          | not assessed             | not assessed                       | not assessed                      | poor                                 | not assessed                        | not assessed                             | not assessed                        | poor                            |
| 231. | Patient-Centered Observation Form (PCOF)                                             | Patient-Centered Observation Form (PCOF)                                                     | Chesser, A. <sup>183</sup>                | 76                    | poor                                  | not assessed             | not assessed                       | not assessed                      | not assessed                         | not assessed                        | not assessed                             | not assessed                        | not assessed                    |
| 232. | Patient-centered questionnaire (PCQ)                                                 | Patient Centred Questionnaire - Infertility (PCQ)-Infertility                                | Pedro, J. <sup>184</sup>                  | 283                   | excellent                             | not assessed             | not assessed                       | not assessed                      | good                                 | good                                | poor                                     | not assessed                        | not assessed                    |
| 233. |                                                                                      | Patient-Centered Questionnaire for PD (PCQ-PD)                                               | van der Eijk, M. <sup>185</sup>           | 371                   | fair                                  | not assessed             | not assessed                       | excellent                         | fair                                 | not assessed                        | not assessed                             | not assessed                        | not assessed                    |
| 234. |                                                                                      | Patient-Centered Questionnaire-infertility (PCQ-infertility)                                 | van Empel, I. W. <sup>186</sup>           | 372                   | poor                                  | fair                     | not assessed                       | excellent                         | not assessed                         | fair                                | not assessed                             | not assessed                        | not assessed                    |
| 235. | Patient-centered score sheet                                                         | Patient-centered score sheet                                                                 | Henbest <sup>187</sup>                    | 502                   | not assessed                          | poor                     | not assessed                       | not assessed                      | not assessed                         | not assessed                        | not assessed                             | good                                | good                            |
| 236. | Patient-centered care competency (PCC)                                               | Patient-centred care competency (PCC) scale                                                  | Hwang, J. I. <sup>188</sup>               | 198                   | excellent                             | poor                     | not assessed                       | fair                              | excellent                            | not assessed                        | not assessed                             | not assessed                        | not assessed                    |
| 237. | Patient-centered instrument for assessment of quality of breast cancer care          | Pilot instrument: patient-centred instrument for Assessment of quality of breast cancer care | de Kok, M. <sup>189</sup>                 | 99                    | fair                                  | not assessed             | not assessed                       | fair                              | fair                                 | not assessed                        | not assessed                             | not assessed                        | not assessed                    |
| 238. | Patient-Centeredness Multi-Choice Questionnaire x (PMQX)                             | Patient-Centredness Multi-Choice Questionnaire x (PMQX)                                      | Rolfe <sup>190</sup>                      | 574                   | not assessed                          | fair                     | not assessed                       | not assessed                      | not assessed                         | fair                                | not assessed                             | not assessed                        | not assessed                    |
| 239. | Patient-Doctor Depth of Relationship Scale                                           | Patient-Doctor Depth Of Relationship Scale                                                   | Ridd <sup>191</sup>                       | 571                   | fair                                  | fair                     | not assessed                       | good                              | fair                                 | fair                                | not assessed                             | not assessed                        | not assessed                    |
| 240. | Patient-Doctor Relationship Questionnaire                                            | Patient-doctor relationship questionnaire (PDRQ-9)                                           | Van der Feltz-Cornelis <sup>192</sup>     | 620                   | good                                  | good                     | not assessed                       | excellent                         | good                                 | not assessed                        | not assessed                             | not assessed                        | not assessed                    |
| 241. |                                                                                      | Patient-Doctor Relationship Questionnaire (PDRQ)                                             | Mingote Adan, J. <sup>193</sup>           | 257                   | poor                                  | not assessed             | not assessed                       | not assessed                      | fair                                 | not assessed                        | poor                                     | fair                                | not assessed                    |
| 242. | Patient-relevant hierarchy of needs                                                  | Patient-relevant hierarchy of needs (Juhnke 2013)                                            | Juhnke, C. <sup>194</sup>                 | 207                   | poor                                  | not assessed             | not assessed                       | fair                              | fair                                 | not assessed                        | not assessed                             | not assessed                        | not assessed                    |
| 243. | Patient-reported Interpersonal Processes of Care                                     | patient reported interpersonal processes of care (IPC)                                       | Stewart, A. L. <sup>195</sup>             | 342                   | excellent                             | not assessed             | not assessed                       | good                              | excellent                            | good                                | not assessed                             | not assessed                        | not assessed                    |
| 244. | Patient's Perception of Continuity (PC)                                              | Patient's Perception of Continuity (PC)                                                      | Chao, J. <sup>196</sup>                   | 71                    | fair                                  | not assessed             | not assessed                       | fair                              | fair                                 | not assessed                        | not assessed                             | poor                                | not assessed                    |
| 245. | Pediatric Patient-Family-Centered Care Benchmarking Survey                           | Pediatric Patient-Family-Centered Care Benchmarking Survey                                   | Carmen, S. <sup>197</sup>                 | 70                    | fair                                  | not assessed             | not assessed                       | excellent                         | fair                                 | not assessed                        | not assessed                             | not assessed                        | not assessed                    |
| 246. | Pediatric Trust in Physician Scale (Pedi-TiPS)                                       | Pediatric Trust in Physician Scale (Pedi-TiPS)                                               | Moseley <sup>198</sup>                    | 556                   | poor                                  | not assessed             | not assessed                       | not assessed                      | not assessed                         | good                                | not assessed                             | not assessed                        | not assessed                    |
| 247. | Perceived Involvement in Care Scale                                                  | modified version of the Perceived Involvement in Care Scale (M-PICS)                         | Smith <sup>199</sup>                      | 593                   | fair                                  | not assessed             | not assessed                       | not assessed                      | fair                                 | fair                                | not assessed                             | not assessed                        | not assessed                    |
| 248. | Perceptions of Involvement in Care Scale                                             | Perceptions of Involvement in Care Scale (PICS)                                              | Lerman <sup>200</sup>                     | 527                   | fair                                  | not assessed             | not assessed                       | not assessed                      | fair                                 | fair                                | not assessed                             | not assessed                        | not assessed                    |
| 249. | Person-centered Care Assessment Tool (P-CAT)                                         | Person-centered Care Assessment Tool (P-CAT)                                                 | Edvardsson <sup>201</sup>                 | 454                   | excellent                             | good                     | not assessed                       | excellent                         | excellent                            | not assessed                        | not assessed                             | not assessed                        | not assessed                    |
| 250. |                                                                                      | Person-Centered Care Assessment Tool (P-CAT)                                                 | Sjogren, K. <sup>202</sup>                | 331                   | poor                                  | good                     | not assessed                       | good                              | good                                 | not assessed                        | good                                     | not assessed                        | not assessed                    |
| 251. |                                                                                      | Person-Centred Care Assessment Tool (P-CAT)                                                  | Rokstad, A. M. <sup>203</sup>             | 296                   | fair                                  | fair                     | not assessed                       | not assessed                      | fair                                 | fair                                | poor                                     | not assessed                        | not assessed                    |
| 252. | Person-centered care of Older People with Cognitive Impairment in Acute Care (POPAC) | Person-Centred Care Of Older People With Cognitive Impairment In Acute Care (POPAC)Scale     | Nilsson, A. <sup>204</sup>                | 266                   | fair                                  | fair                     | not assessed                       | fair                              | fair                                 | not assessed                        | fair                                     | not assessed                        | not assessed                    |
| 253. |                                                                                      | Person-centred care of Older People with cognitive impairment in Acute Care (POPAC)          | Edvardsson, D. <sup>205</sup>             | 115                   | fair                                  | poor                     | not assessed                       | fair                              | fair                                 | not assessed                        | not assessed                             | not assessed                        | not assessed                    |
| 254. | Processes Index (measure of person-centered planning)^^^                             | Processes Index (measure of person-centered planning)^^^                                     | Holburn, S. <sup>206</sup>                | 181                   | poor                                  | poor                     | not assessed                       | excellent                         | poor                                 | not assessed                        | not assessed                             | not assessed                        | not assessed                    |
| 255. | Outcomes index (measure of person-centered planning)^^^                              | Outcomes index (measure of person-centered planning)^^^                                      | Holburn, S. <sup>206</sup>                | 182                   | poor                                  | poor                     | not assessed                       | excellent                         | poor                                 | not assessed                        | not assessed                             | not assessed                        | not assessed                    |
| 256. | Person-centered Climate Questionnaire (PCCQ)                                         | Person-Centered Climate Questionnaire - patient version (English)                            | Edvardsson, D. <sup>207</sup>             | 113                   | fair                                  | fair                     | not assessed                       | excellent                         | fair                                 | not assessed                        | poor                                     | not assessed                        | not assessed                    |



|      | Index Instrument<br>(209 index instruments)                                                                                                                     | Instrument Name and Version<br>(379 validations studies)                                                                                                                      | Reference Study<br>(300 articles) | Study<br>Code | Internal consistency<br>score | Reliability score | Measurement error<br>score | Content validity<br>score | Structural validity<br>score | Construct validity<br>score | Cross-cultural<br>validity score | Criterion validity<br>score | Responsiveness<br>score |
|------|-----------------------------------------------------------------------------------------------------------------------------------------------------------------|-------------------------------------------------------------------------------------------------------------------------------------------------------------------------------|-----------------------------------|---------------|-------------------------------|-------------------|----------------------------|---------------------------|------------------------------|-----------------------------|----------------------------------|-----------------------------|-------------------------|
| 257. |                                                                                                                                                                 | Person-Centered Climate Questionnaire - staff version (English)                                                                                                               | Edvardsson, D. <sup>208</sup>     | 114           | fair                          | fair              | not assessed               | excellent                 | fair                         | not assessed                | poor                             | not assessed                | not assessed            |
| 258. |                                                                                                                                                                 | Person-centred Climate Questionnaire - patient version (Swedish)                                                                                                              | Edvardsson <sup>209</sup>         | 116           | good                          | fair              | not assessed               | excellent                 | good                         | not assessed                | not assessed                     | not assessed                | not assessed            |
| 259. |                                                                                                                                                                 | Person-centred Climate Questionnaire-Staff version (PCQ-S), Norwegian                                                                                                         | Bergland, A. <sup>210</sup>       | 47            | good                          | good              | not assessed               | excellent                 | good                         | not assessed                | poor                             | not assessed                | not assessed            |
| 260. |                                                                                                                                                                 | Person-centred Climate Questionnaire - staff version (Swedish)                                                                                                                | Edvardsson <sup>211</sup>         | 117           | good                          | fair              | not assessed               | excellent                 | good                         | not assessed                | not assessed                     | not assessed                | not assessed            |
| 261. | Person-Centered Health Care for Older Adults Survey                                                                                                             | Person-Centred Health Care for Older Adults Survey                                                                                                                            | Dow, B. <sup>212</sup>            | 108           | excellent                     | not assessed      | not assessed               | excellent                 | excellent                    | not assessed                | not assessed                     | not assessed                | not assessed            |
| 262. | Person-directed Care (PDC)                                                                                                                                      | Person-directed care (PDC)                                                                                                                                                    | White, D. L. <sup>213</sup>       | 389           | good                          | not assessed      | not assessed               | excellent                 | good                         | good                        | not assessed                     | not assessed                | not assessed            |
| 263. | Pharmacy Service Orientation Measure                                                                                                                            | Pharmacy Service Orientation Measure                                                                                                                                          | Clark, B. E. <sup>214</sup>       | 78            | poor                          | not assessed      | not assessed               | not assessed              | not assessed                 | not assessed                | not assessed                     | not assessed                | not assessed            |
| 264. | Picker Commonwealth Patient Centered Care Questionnaire                                                                                                         | Picker-Commonwealth Patient Centred Care Questionnaire                                                                                                                        | Ryan, M. E. <sup>215</sup>        | 301           | not assessed                  | poor              | not assessed               | fair                      | not assessed                 | not assessed                | not assessed                     | not assessed                | not assessed            |
| 265. | Postoperative Handover Assessment Tool (PoHAT)                                                                                                                  | Postoperative Handover Assessment Tool (PoHAT)                                                                                                                                | Nagpal, K. <sup>216</sup>         | 264           | not assessed                  | fair              | not assessed               | fair                      | not assessed                 | fair                        | not assessed                     | not assessed                | not assessed            |
| 266. | Prescriptions, Ready to reenter the community, Placement, Assurance of Safety, Realistic Expectations, Empowerment, Directed to appropriate services (PREPARED) | PREPARED - Prescriptions, Ready to re-enter the community, Placement, Assurance of Safety, Realistic Expectations, Empowerment, Directed to appropriate services              | Grimmer <sup>217</sup>            | 470           | not assessed                  | not assessed      | not assessed               | excellent                 | good                         | good                        | not assessed                     | good                        | not assessed            |
| 267. | Primary Care Assessment Survey (PCAS)                                                                                                                           | (PCAS) Primary Care Assessment Survey                                                                                                                                         | Beaulieu, M. D. <sup>39</sup>     | 38            | fair                          | not assessed      | poor                       | excellent                 | fair                         | poor                        | not assessed                     | not assessed                | not assessed            |
| 268. |                                                                                                                                                                 | PCAS - Primary Care Assessment Survey                                                                                                                                         | Haggerty <sup>42</sup>            | 476           | excellent                     | not assessed      | not assessed               | not assessed              | excellent                    | not assessed                | not assessed                     | not assessed                | not assessed            |
| 269. |                                                                                                                                                                 |                                                                                                                                                                               | Haggerty <sup>43</sup>            | 482           | excellent                     | not assessed      | not assessed               | not assessed              | excellent                    | not assessed                | not assessed                     | not assessed                | not assessed            |
| 270. |                                                                                                                                                                 |                                                                                                                                                                               | Haggerty <sup>83</sup>            | 486           | excellent                     | not assessed      | not assessed               | not assessed              | excellent                    | not assessed                | not assessed                     | not assessed                | not assessed            |
| 271. |                                                                                                                                                                 | PCAS (Visit-based continuity)                                                                                                                                                 | Burge <sup>44</sup>               | 431           | excellent                     | not assessed      | not assessed               | excellent                 | excellent                    | good                        | not assessed                     | not assessed                | not assessed            |
| 272. |                                                                                                                                                                 | Primary Care Assessment Survey (PCAS)                                                                                                                                         | Safran <sup>218</sup>             | 577           | poor                          | fair              | not assessed               | not assessed              | not assessed                 | not assessed                | not assessed                     | not assessed                | not assessed            |
| 273. | Primary Care Assessment Tool (PCAT)                                                                                                                             | Consumer/Client Primary Care Assessment Tool Adult Edition (PCAT-AE)                                                                                                          | Shi <sup>219</sup>                | 589           | good                          | not assessed      | not assessed               | excellent                 | good                         | not assessed                | not assessed                     | not assessed                | not assessed            |
| 274. |                                                                                                                                                                 | Korean consumer form of the short Primary Care Assessment Tool (KC-PCAT); IMPORTANT NOTE: Psychometric testing was carried out on 37 items of the KC PCAT to make the KS PCAT | Jeon, K. Y. <sup>220</sup>        | 203           | excellent                     | fair              | poor                       | not assessed              | poor                         | good                        | fair                             | excellent                   | not assessed            |
| 275. |                                                                                                                                                                 | Korean standard form of the short Primary Care Assessment Tool (KS-PCAT)                                                                                                      | Jeon, K. Y. <sup>220</sup>        | 204           | excellent                     | fair              | poor                       | not assessed              | poor                         | good                        | fair                             | excellent                   | not assessed            |
| 276. |                                                                                                                                                                 | KPCAT, V1 ( Korean Primary Care Assessment Tool Version 1)                                                                                                                    | Lee <sup>221</sup>                | 525           | excellent                     | not assessed      | not assessed               | excellent                 | excellent                    | good                        | not assessed                     | not assessed                | not assessed            |
| 277. |                                                                                                                                                                 | PCAT - Primary Care Assessment Tool                                                                                                                                           | Haggerty <sup>42</sup>            | 477           | excellent                     | not assessed      | not assessed               | not assessed              | excellent                    | not assessed                | not assessed                     | not assessed                | not assessed            |
| 278. |                                                                                                                                                                 |                                                                                                                                                                               | Haggerty <sup>43</sup>            | 483           | excellent                     | not assessed      | not assessed               | not assessed              | excellent                    | not assessed                | not assessed                     | not assessed                | not assessed            |
| 279. |                                                                                                                                                                 |                                                                                                                                                                               | Haggerty <sup>83</sup>            | 487           | excellent                     | not assessed      | not assessed               | not assessed              | excellent                    | not assessed                | not assessed                     | not assessed                | not assessed            |
| 280. |                                                                                                                                                                 | PCAT-Child Edition                                                                                                                                                            | Cassady <sup>222</sup>            | 436           | good                          | fair              | not assessed               | excellent                 | good                         | good                        | not assessed                     | not assessed                | not assessed            |
| 281. |                                                                                                                                                                 | PCAT-S Ongoing Care                                                                                                                                                           | Burge <sup>44</sup>               | 432           | excellent                     | not assessed      | not assessed               | excellent                 | excellent                    | good                        | not assessed                     | not assessed                | not assessed            |
| 282. |                                                                                                                                                                 | Primary Care Assessment Tool – Short Form (PCAT-S) Community Orientation                                                                                                      | Haggerty <sup>41</sup>            | 161           | excellent                     | not assessed      | not assessed               | excellent                 | excellent                    | not assessed                | not assessed                     | not assessed                | not assessed            |
| 283. |                                                                                                                                                                 | Primary Care Assessment Tool – Short Form (PCAT-S) Comprehensiveness – Services Available                                                                                     | Haggerty <sup>41</sup>            | 158           | excellent                     | not assessed      | not assessed               | excellent                 | excellent                    | not assessed                | not assessed                     | not assessed                | not assessed            |

|      | <b>Index Instrument<br/>(209 index instruments)</b>                              | <b>Instrument Name and Version<br/>(379 validations studies)</b>                                            | <b>Reference Study<br/>(300 articles)</b> | <b>Study<br/>Code</b> | <b>Internal consistency<br/>score</b> | <b>Reliability score</b> | <b>Measurement error<br/>score</b> | <b>Content validity<br/>score</b> | <b>Structural validity<br/>score</b> | <b>Construct validity<br/>score</b> | <b>Cross-cultural<br/>validity score</b> | <b>Criterion validity<br/>score</b> | <b>Responsiveness<br/>score</b> |
|------|----------------------------------------------------------------------------------|-------------------------------------------------------------------------------------------------------------|-------------------------------------------|-----------------------|---------------------------------------|--------------------------|------------------------------------|-----------------------------------|--------------------------------------|-------------------------------------|------------------------------------------|-------------------------------------|---------------------------------|
| 284. |                                                                                  | Primary Care Assessment Tool – Short Form (PCAT-S) First-Contact Utilization                                | Haggerty <sup>41</sup>                    | 159                   | excellent                             | not assessed             | not assessed                       | excellent                         | excellent                            | not assessed                        | not assessed                             | not assessed                        | not assessed                    |
| 285. |                                                                                  | Primary Care Assessment Tool (PCAT)- Brazillian                                                             | Macinko <sup>223</sup>                    | 531                   | excellent                             | not assessed             | not assessed                       | not assessed                      | good                                 | good                                | poor                                     | not assessed                        | not assessed                    |
| 286. | Primary Care Behavioral Health Provider Adherence Questionnaire (PPAQ)           | Primary Care Behavioral Health Provider Adherence Questionnaire (PPAQ)                                      | Beehler, G. P. <sup>224</sup>             | 42                    | poor                                  | not assessed             | not assessed                       | excellent                         | poor                                 | fair                                | not assessed                             | fair                                | not assessed                    |
| 287. | Prostate Care Questionnaire for Patients (PCQ-P)                                 | Prostate Care Questionnaire for Patients (PCQ-P)                                                            | Tarrant <sup>225</sup>                    | 608                   | good                                  | good                     | not assessed                       | excellent                         | good                                 | good                                | not assessed                             | not assessed                        | not assessed                    |
| 288. | Quality Care Questionnaire–End of Life (QCQ–EOL)                                 | Quality Care Questionnaire–End of Life (QCQ–EOL)                                                            | Yun <sup>226</sup>                        | 632                   | good                                  | not assessed             | not assessed                       | excellent                         | good                                 | not assessed                        | not assessed                             | not assessed                        | not assessed                    |
| 289. | Quality from Patient's Perspective                                               | Quality from Patient's Perspective                                                                          | Wilde <sup>227</sup>                      | 625                   | good                                  | not assessed             | not assessed                       | excellent                         | good                                 | not assessed                        | not assessed                             | not assessed                        | not assessed                    |
| 290. |                                                                                  |                                                                                                             | Wilde <sup>227</sup>                      | 626                   | good                                  | not assessed             | not assessed                       | excellent                         | good                                 | not assessed                        | not assessed                             | not assessed                        | not assessed                    |
| 291. | Quality of Care Through the Patients' Eyes (QUOTE)                               | Quality of care from the perspective of elderly people: the QUOTE Elderly                                   | Sixma <sup>228</sup>                      | 592                   | fair                                  | not assessed             | not assessed                       | excellent                         | fair                                 | not assessed                        | not assessed                             | not assessed                        | not assessed                    |
| 292. |                                                                                  | Quality of care from the perspective of non-institutionalized rheumatic patients (QUOTE-Rheumatic-Patients) | van Campen <sup>229</sup>                 | 618                   | good                                  | not assessed             | not assessed                       | excellent                         | good                                 | not assessed                        | not assessed                             | not assessed                        | not assessed                    |
| 293. |                                                                                  | Quality Of Care Through The Patients' Eyes (QUOTE) -Chemo : Importance                                      | van Weert, J. C. <sup>230</sup>           | 374                   | excellent                             | not assessed             | not assessed                       | fair                              | good                                 | good                                | not assessed                             | not assessed                        | not assessed                    |
| 294. |                                                                                  | Quality Of Care Through The Patients' Eyes (QUOTE) -Chemo :Performance                                      | van Weert, J. C. <sup>230</sup>           | 375                   | excellent                             | not assessed             | not assessed                       | fair                              | good                                 | good                                | not assessed                             | not assessed                        | not assessed                    |
| 295. |                                                                                  | Quality of Health Care in Inflammatory Bowel Disease (QUOTE-IBD)                                            | van der Eijk <sup>231</sup>               | 619                   | good                                  | fair                     | not assessed                       | excellent                         | not assessed                         | not assessed                        | not assessed                             | good                                | not assessed                    |
| 296. |                                                                                  | QUOTE-cataract questionnaire (Quality Of care Through the patient's Eyes)                                   | Nijkamp <sup>232</sup>                    | 562                   | good                                  | good                     | not assessed                       | not assessed                      | good                                 | not assessed                        | not assessed                             | not assessed                        | not assessed                    |
| 297. | Quality of Dying and Death (QODD)                                                | Quality of Dying and Death (QODD)                                                                           | Curtis, J. R. <sup>233</sup>              | 96                    | excellent                             | not assessed             | not assessed                       | not assessed                      | excellent                            | poor                                | not assessed                             | not assessed                        | not assessed                    |
| 298. | Quality of End-of-life care and Satisfaction with Treatment (QUEST)              | Quality of End-of-life care and Satisfaction with Treatment (QUEST)                                         | Sulmasy <sup>234</sup>                    | 607                   | poor                                  | fair                     | not assessed                       | good                              | not assessed                         | fair                                | poor                                     | not assessed                        | not assessed                    |
| 299. | Quality of end-of-life communication (QOC)                                       | quality of end-of-life communication (QOC)                                                                  | Engelberg <sup>235</sup>                  | 458                   | excellent                             | not assessed             | not assessed                       | excellent                         | excellent                            | good                                | not assessed                             | not assessed                        | not assessed                    |
| 300. | Quality of Family Experience (QUAL-E FAM)                                        | Quality of Family Experience (QUAL-E (FAM))                                                                 | Steinhauser, K. E. <sup>236</sup>         | 339                   | fair                                  | fair                     | not assessed                       | excellent                         | fair                                 | poor                                | not assessed                             | not assessed                        | not assessed                    |
| 301. | Quality of Psychiatric Care                                                      | Quality of Psychiatric Care (QPC)                                                                           | Schroder, A. <sup>237</sup>               | 313                   | good                                  | not assessed             | not assessed                       | not assessed                      | good                                 | good                                | not assessed                             | not assessed                        | not assessed                    |
| 302. | Race-based Medical Mistrust                                                      | Race-based Medical Mistrust. The GBMMS                                                                      | Shelton <sup>238</sup>                    | 588                   | good                                  | not assessed             | not assessed                       | not assessed                      | good                                 | good                                | not assessed                             | not assessed                        | not assessed                    |
| 303. | Relational and management continuity of care Questionnaire                       | Relational and management continuity of care Questionnaire                                                  | Gulliford, M. <sup>239</sup>              | 152                   | fair                                  | not assessed             | not assessed                       | fair                              | fair                                 | not assessed                        | not assessed                             | not assessed                        | not assessed                    |
| 304. | Relational Communication Scale                                                   | Relational communication scale                                                                              | Gallagher <sup>240</sup>                  | 464                   | poor                                  | not assessed             | not assessed                       | not assessed                      | poor                                 | poor                                | not assessed                             | not assessed                        | not assessed                    |
| 305. | Relational communication scale for observational measurement (RCS-O)             | Relational communication scale for observational measurement (RCS-O)                                        | Gallagher, T. J. <sup>241</sup>           | 140                   | fair                                  | fair                     | not assessed                       | not assessed                      | fair                                 | poor                                | not assessed                             | not assessed                        | not assessed                    |
| 306. | Revised Health Care System Distrust Scale                                        | Revised Health Care System Distrust Scale                                                                   | Shea <sup>242</sup>                       | 585                   | fair                                  | not assessed             | not assessed                       | excellent                         | fair                                 | fair                                | not assessed                             | not assessed                        | not assessed                    |
| 307. | Rochester Participatory Decision-Making Scale (RPAD)                             | Rochester Participatory Decision-Making Scale (RPAD).                                                       | Shields <sup>243</sup>                    | 590                   | not assessed                          | good                     | not assessed                       | not assessed                      | not assessed                         | good                                | not assessed                             | not assessed                        | not assessed                    |
| 308. | Safety Net Medical Home Scale (SNMHS)                                            | Safety Net Medical Home Scale (SNMHS)                                                                       | Birnberg, J. M. <sup>244</sup>            | 50                    | poor                                  | not assessed             | not assessed                       | excellent                         | poor                                 | not assessed                        | not assessed                             | not assessed                        | not assessed                    |
| 309. | Scale of Functional Integration                                                  | Scale of Functional Integration                                                                             | Ahgren, B. <sup>245</sup>                 | 6                     | poor                                  | not assessed             | not assessed                       | fair                              | poor                                 | poor                                | not assessed                             | not assessed                        | not assessed                    |
| 310. | Scale To Assess Therapeutic Relationships in Community Mental Health Care (STAR) | Scale To Assess Therapeutic Relationships in Community Mental Health Care (STAR)-C                          | McGuire-Snieckus <sup>246</sup>           | 544                   | not assessed                          | not assessed             | not assessed                       | not assessed                      | fair                                 | fair                                | fair                                     | not assessed                        | not assessed                    |
| 311. |                                                                                  | Scale To Assess Therapeutic Relationships in Community Mental Health Care (STAR)-P                          | McGuire-Snieckus <sup>246</sup>           | 543                   | not assessed                          | not assessed             | not assessed                       | not assessed                      | fair                                 | fair                                | fair                                     | not assessed                        | not assessed                    |
| 312. | Service Quality Questionnaire                                                    | Service Quality Questionnaire - Perception                                                                  | Tomes <sup>247</sup>                      | 613                   | fair                                  | not assessed             | not assessed                       | excellent                         | fair                                 | not assessed                        | not assessed                             | not assessed                        | not assessed                    |

|      | <b>Index Instrument<br/>(209 index instruments)</b>                  | <b>Instrument Name and Version<br/>(379 validations studies)</b>                | <b>Reference Study<br/>(300 articles)</b>                     | <b>Study<br/>Code</b> | <b>Internal consistency<br/>score</b> | <b>Reliability score</b> | <b>Measurement error<br/>score</b> | <b>Content validity<br/>score</b> | <b>Structural validity<br/>score</b> | <b>Construct validity<br/>score</b> | <b>Cross-cultural<br/>validity score</b> | <b>Criterion validity<br/>score</b> | <b>Responsiveness<br/>score</b> |
|------|----------------------------------------------------------------------|---------------------------------------------------------------------------------|---------------------------------------------------------------|-----------------------|---------------------------------------|--------------------------|------------------------------------|-----------------------------------|--------------------------------------|-------------------------------------|------------------------------------------|-------------------------------------|---------------------------------|
| 313. | SERVQUAL                                                             | SERVQUAL                                                                        | Vandamme <sup>248</sup>                                       | 621                   | fair                                  | not assessed             | not assessed                       | good                              | excellent                            | good                                | not assessed                             | not assessed                        | not assessed                    |
| 314. |                                                                      | SERVQUAL (modified for hospital environment)                                    | Babakus, E. <sup>249</sup>                                    | 20                    | fair                                  | poor                     | poor                               | fair                              | fair                                 | fair                                | not assessed                             | not assessed                        | not assessed                    |
| 315. | Survivor Unmet Needs Survey (SUNS)                                   | Cancer Survivors' Partners Unmet Needs measure (CaSPUN)                         | Hodgkinson, K. <sup>250</sup>                                 | 176                   | fair                                  | fair                     | not assessed                       | fair                              | fair                                 | fair                                | not assessed                             | not assessed                        | not assessed                    |
| 316. |                                                                      | Cancer Survivors' Unmet Needs measure (CaSUN)                                   | Hodgkinson, K. <sup>251</sup>                                 | 177                   | fair                                  | fair                     | not assessed                       | fair                              | fair                                 | fair                                | not assessed                             | not assessed                        | not assessed                    |
| 317. |                                                                      | Survivor Unmet Needs Survey (SUNS)                                              | Campbell, H. S. <sup>252</sup>                                | 68                    | good                                  | not assessed             | not assessed                       | not assessed                      | excellent                            | not assessed                        | not assessed                             | excellent                           | not assessed                    |
| 318. |                                                                      | Survivors Unmet Needs Survey (SUNS)                                             | Campbell, H. S. <sup>253</sup>                                | 69                    | good                                  | good                     | not assessed                       | excellent                         | good                                 | not assessed                        | not assessed                             | not assessed                        | not assessed                    |
| 319. | Systematic Culture Inquiry On Patient safety in primary care (SCOPE) | SCOPE                                                                           | Zwart, D. L. <sup>254</sup>                                   | 405                   | excellent                             | not assessed             | not assessed                       | excellent                         | excellent                            | good                                | not assessed                             | not assessed                        | not assessed                    |
| 320. | Systematic Monitoring of Male Circumcision Scale-Up                  | Systematic Monitoring of Male Circumcision Scale-Up                             | Omondi Aduda <sup>255</sup>                                   | 639                   | not assessed                          | not assessed             | not assessed                       | not assessed                      | good                                 | not assessed                        | not assessed                             | not assessed                        | not assessed                    |
| 321. | Team Emergency Assessment Measure (TEAM)                             | Team Emergency Assessment Measure - TEAM                                        | Cooper <sup>256</sup>                                         | 442                   | fair                                  | fair                     | not assessed                       | excellent                         | fair                                 | not assessed                        | not assessed                             | not assessed                        | not assessed                    |
| 322. | Team Evaluation and Assessment Measure (TEAM)                        | TEAM (Team Evaluation and Assessment Measure)                                   | Taylor, C. <sup>257</sup>                                     | 354                   | poor                                  | not assessed             | not assessed                       | good                              | not assessed                         | fair                                | not assessed                             | not assessed                        | not assessed                    |
| 323. | The Human Connection Scale                                           | The Human Connection (THC) scale                                                | Mack <sup>258</sup>                                           | 532                   | fair                                  | not assessed             | not assessed                       | not assessed                      | fair                                 | fair                                | not assessed                             | not assessed                        | not assessed                    |
| 324. | Therapy Alliance Scale                                               | Couple Therapy Alliance Scale (CTAS) -Revised                                   | Pinsof, W. M. <sup>259</sup>                                  | 289                   | good                                  | not assessed             | not assessed                       | not assessed                      | good                                 | good                                | not assessed                             | not assessed                        | not assessed                    |
| 325. |                                                                      | Family Therapy Alliance Scale (FTAS) -Revised                                   | Pinsof, W. M. <sup>259</sup>                                  | 290                   | good                                  | not assessed             | not assessed                       | not assessed                      | good                                 | good                                | not assessed                             | not assessed                        | not assessed                    |
| 326. |                                                                      | Individual Therapy Alliance Scale (ITAS) -Revised                               | Pinsof, W. M. <sup>259</sup>                                  | 288                   | fair                                  | not assessed             | not assessed                       | not assessed                      | good                                 | good                                | not assessed                             | not assessed                        | not assessed                    |
| 327. | Trust in Nurses Scale                                                | Trust In Nurses Scale                                                           | Radwin <sup>260</sup>                                         | 567                   | fair                                  | not assessed             | not assessed                       | not assessed                      | fair                                 | not assessed                        | not assessed                             | not assessed                        | not assessed                    |
| 328. |                                                                      |                                                                                 | Radwin <sup>260</sup>                                         | 568                   | fair                                  | not assessed             | not assessed                       | not assessed                      | fair                                 | not assessed                        | not assessed                             | not assessed                        | not assessed                    |
| 329. |                                                                      |                                                                                 | Radwin <sup>261</sup>                                         | 569                   | fair                                  | not assessed             | not assessed                       | good                              | not assessed                         | fair                                | not assessed                             | not assessed                        | not assessed                    |
| 330. | Trust in Oncologist Scale (TiOS)                                     | Trust in Oncologist Scale (TiOS)                                                | Hillen <sup>262</sup>                                         | 507                   | excellent                             | good                     | not assessed                       | excellent                         | excellent                            | not assessed                        | not assessed                             | not assessed                        | not assessed                    |
| 331. | Trust in Physicians Scale                                            | Trust in Physician Scale                                                        | Freburger <sup>263</sup>                                      | 461                   | excellent                             | not assessed             | not assessed                       | excellent                         | excellent                            | good                                | not assessed                             | not assessed                        | not assessed                    |
| 332. |                                                                      |                                                                                 | Thom <sup>264</sup>                                           | 610                   | poor                                  | fair                     | not assessed                       | not assessed                      | not assessed                         | fair                                | not assessed                             | not assessed                        | not assessed                    |
| 333. |                                                                      | Trust in Physicians Scale                                                       | Anderson <sup>265</sup>                                       | 409                   | good                                  | not assessed             | not assessed                       | excellent                         | poor                                 | poor                                | not assessed                             | not assessed                        | not assessed                    |
| 334. | Trust in the Medical Profession                                      | Trust in the Medical Profession                                                 | Hall <sup>266</sup>                                           | 489                   | excellent                             | not assessed             | not assessed                       | excellent                         | excellent                            | good                                | not assessed                             | not assessed                        | not assessed                    |
| 335. | Tucker Culturally Sensitive Healthcare Inventory (T-CUSHCI)          | T-CUSHCI African American                                                       | Tucker, C. M. <sup>267</sup>                                  | 361                   | poor                                  | fair                     | not assessed                       | not assessed                      | not assessed                         | not assessed                        | not assessed                             | not assessed                        | not assessed                    |
| 336. |                                                                      | T-CUSHCI Non-Hispanic White American Patient                                    | Tucker, C. M. <sup>267</sup>                                  | 362                   | poor                                  | fair                     | not assessed                       | not assessed                      | not assessed                         | not assessed                        | not assessed                             | not assessed                        | not assessed                    |
| 337. |                                                                      | Tucker -Culturally Sensitive Health Care Inventory (T-CUSHCI)- Provider Form    | Tucker, C. M. <sup>267</sup><br>Mirsu-Paun, A. <sup>268</sup> | 259                   | poor                                  | not assessed             | not assessed                       | fair                              | poor                                 | poor                                | not assessed                             | not assessed                        | not assessed                    |
| 338. | Unnamed 1                                                            | 71-item questionnaire                                                           | Adams, R. <sup>269</sup>                                      | 5                     | not assessed                          | not assessed             | not assessed                       | fair                              | fair                                 | poor                                | not assessed                             | not assessed                        | not assessed                    |
| 339. | Unnamed 12                                                           | Unnamed                                                                         | McLaughlin, S. E. <sup>270</sup>                              | 252                   | poor                                  | fair                     | not assessed                       | good                              | not assessed                         | not assessed                        | not assessed                             | not assessed                        | not assessed                    |
| 340. | Unnamed 14                                                           | Unnamed: a questionnaire to assess collaboration between clinical professionals | Nuno-Solinis, R. <sup>271</sup>                               | 269                   | fair                                  | not assessed             | not assessed                       | fair                              | fair                                 | not assessed                        | not assessed                             | not assessed                        | not assessed                    |
| 341. | Unnamed 15                                                           | Unnamed: indicators for patient-centered care                                   | Ouwens, M. <sup>272</sup>                                     | 275                   | poor                                  | not assessed             | not assessed                       | fair                              | not assessed                         | not assessed                        | not assessed                             | not assessed                        | poor                            |
| 342. | Unnamed 16                                                           | Unnamed                                                                         | Samele, C. <sup>273</sup>                                     | 305                   | not assessed                          | not assessed             | not assessed                       | not assessed                      | poor                                 | poor                                | not assessed                             | not assessed                        | not assessed                    |
| 343. | Unnamed 17                                                           | Unnamed                                                                         | Shields, L. <sup>274</sup>                                    | 325                   | poor                                  | fair                     | not assessed                       | fair                              | poor                                 | not assessed                        | not assessed                             | poor                                | not assessed                    |
| 344. | Unnamed 18                                                           | Unnamed                                                                         | Sidani, S. <sup>275</sup>                                     | 328                   | poor                                  | not assessed             | not assessed                       | not assessed                      | not assessed                         | fair                                | not assessed                             | not assessed                        | not assessed                    |
| 345. | Unnamed 19                                                           | Unnamed                                                                         | Sidani, S. <sup>275</sup>                                     | 329                   | poor                                  | not assessed             | not assessed                       | not assessed                      | not assessed                         | fair                                | not assessed                             | not assessed                        | not assessed                    |
| 346. | Unnamed 20                                                           | Unnamed                                                                         | Straten, G. F. <sup>276</sup>                                 | 345                   | fair                                  | not assessed             | not assessed                       | not assessed                      | fair                                 | fair                                | not assessed                             | not assessed                        | not assessed                    |

|      | <b>Index Instrument<br/>(209 index instruments)</b>      | <b>Instrument Name and Version<br/>(379 validations studies)</b>                                        | <b>Reference Study<br/>(300 articles)</b> | <b>Study<br/>Code</b> | <b>Internal consistency<br/>score</b> | <b>Reliability score</b> | <b>Measurement error<br/>score</b> | <b>Content validity<br/>score</b> | <b>Structural validity<br/>score</b> | <b>Construct validity<br/>score</b> | <b>Cross-cultural<br/>validity score</b> | <b>Criterion validity<br/>score</b> | <b>Responsiveness<br/>score</b> |
|------|----------------------------------------------------------|---------------------------------------------------------------------------------------------------------|-------------------------------------------|-----------------------|---------------------------------------|--------------------------|------------------------------------|-----------------------------------|--------------------------------------|-------------------------------------|------------------------------------------|-------------------------------------|---------------------------------|
| 347. | Unnamed 21                                               | Unnamed                                                                                                 | Uyei, J. <sup>277</sup>                   | 368                   | fair                                  | fair                     | not assessed                       | good                              | fair                                 | fair                                | not assessed                             | not assessed                        | not assessed                    |
| 348. | Unnamed 22                                               | Unnamed                                                                                                 | Van den Broeck, U. <sup>278</sup>         | 370                   | fair                                  | not assessed             | not assessed                       | excellent                         | fair                                 | fair                                | not assessed                             | not assessed                        | not assessed                    |
| 349. | Unnamed 23                                               | Unnamed                                                                                                 | Wei, X. <sup>279</sup>                    | 384                   | excellent                             | not assessed             | not assessed                       | fair                              | good                                 | good                                | not assessed                             | not assessed                        | not assessed                    |
| 350. | Unnamed 24                                               | Unnamed                                                                                                 | Zineldin, M. <sup>280</sup>               | 403                   | poor                                  | not assessed             | not assessed                       | not assessed                      | fair                                 | not assessed                        | not assessed                             | not assessed                        | not assessed                    |
| 351. | Unnamed 25                                               | Unnamed questionnaire on quality of care                                                                | de Kok <sup>281</sup>                     | 448                   | not assessed                          | not assessed             | not assessed                       | excellent                         | not assessed                         | not assessed                        | not assessed                             | not assessed                        | not assessed                    |
| 352. | Unnamed 27                                               | A questionnaire that was developed in the Department of General Practice in Nijmegen in the Netherlands | Grol <sup>282</sup>                       | 472                   | fair                                  | not assessed             | not assessed                       | excellent                         | fair                                 | not assessed                        | poor                                     | not assessed                        | not assessed                    |
| 353. | Unnamed 29                                               | Trust Questionnaire (unnamed)                                                                           | Kelly <sup>283</sup>                      | 515                   | good                                  | good                     | not assessed                       | excellent                         | good                                 | not assessed                        | not assessed                             | not assessed                        | not assessed                    |
| 354. | Unnamed 31                                               | Unnamed                                                                                                 | Leisen <sup>284</sup>                     | 526                   | fair                                  | poor                     | not assessed                       | fair                              | fair                                 | fair                                | not assessed                             | fair                                | not assessed                    |
| 355. | Unnamed 32                                               | Unnamed                                                                                                 | Temkin-Greener <sup>285</sup>             | 609                   | poor                                  | not assessed             | not assessed                       | excellent                         | not assessed                         | good                                | not assessed                             | not assessed                        | not assessed                    |
| 356. | Unnamed 33                                               | No Name                                                                                                 | Little <sup>286</sup>                     | 529                   | fair                                  | not assessed             | not assessed                       | poor                              | fair                                 | fair                                | not assessed                             | not assessed                        | not assessed                    |
| 357. | Unnamed 34                                               | Unnamed                                                                                                 | Thom <sup>287</sup>                       | 611                   | fair                                  | fair                     | not assessed                       | excellent                         | fair                                 | fair                                | not assessed                             | not assessed                        | not assessed                    |
| 358. | Unnamed 35                                               | Unnamed (Likert-type questionnaire was used containing 26 items with five response alternatives)        | Wressle <sup>288</sup>                    | 630                   | good                                  | not assessed             | not assessed                       | excellent                         | good                                 | not assessed                        | not assessed                             | not assessed                        | not assessed                    |
| 359. | Unnamed 36                                               | Unnamed: Measuring cancer care coordination                                                             | Young <sup>289</sup>                      | 631                   | good                                  | good                     | not assessed                       | excellent                         | good                                 | not assessed                        | not assessed                             | not assessed                        | not assessed                    |
| 360. | Unnamed 37                                               | Unnamed: trust in pharmacist scale                                                                      | Zhang <sup>290</sup>                      | 633                   | good                                  | not assessed             | not assessed                       | excellent                         | good                                 | good                                | not assessed                             | not assessed                        | not assessed                    |
| 361. | Unnamed 39                                               | Unnamed: good practice indicators for chronic cancer pain management                                    | Saturno <sup>291</sup>                    | 640                   | not assessed                          | fair                     | not assessed                       | not assessed                      | not assessed                         | not assessed                        | not assessed                             | not assessed                        | not assessed                    |
| 362. | Unnamed 4                                                | Hiidenhovi 2001 - patient-orientated instrument                                                         | Hiidenhovi, H. <sup>292</sup>             | 172                   | poor                                  | poor                     | not assessed                       | excellent                         | poor                                 | not assessed                        | not assessed                             | not assessed                        | not assessed                    |
| 363. | Unnamed 40                                               | unnamed questionnaire on patient perception of quality of care                                          | Haddad <sup>293</sup>                     | 475                   | good                                  | not assessed             | not assessed                       | excellent                         | good                                 | good                                | not assessed                             | good                                | not assessed                    |
| 364. | Unnamed 7                                                | Unnamed: described as an integration survey                                                             | Lukas, C. V. <sup>294</sup>               | 239                   | fair                                  | not assessed             | not assessed                       | fair                              | fair                                 | not assessed                        | fair                                     | poor                                | not assessed                    |
| 365. | Unnamed 8                                                | Unnamed                                                                                                 | Masters, S. <sup>295</sup>                | 243                   | fair                                  | fair                     | not assessed                       | not assessed                      | fair                                 | fair                                | not assessed                             | fair                                | not assessed                    |
| 366. | Vanderbilt Therapeutic Alliance Scale (VTAS-R)           | Vanderbilt Therapeutic Alliance Scale (VTAS-R Short Form)                                               | Shelef <sup>296</sup>                     | 586                   | fair                                  | fair                     | not assessed                       | not assessed                      | not assessed                         | fair                                | not assessed                             | poor                                | not assessed                    |
| 367. |                                                          |                                                                                                         | Shelef <sup>296</sup>                     | 587                   | fair                                  | fair                     | not assessed                       | not assessed                      | not assessed                         | fair                                | not assessed                             | poor                                | not assessed                    |
| 368. | Verona medical interview classification system (VR-MICS) | Verona medical interview classification system - VR-MICS (English)                                      | Del Piccolo, L. <sup>297</sup>            | 103                   | not assessed                          | fair                     | not assessed                       | not assessed                      | poor                                 | not assessed                        | poor                                     | not assessed                        | not assessed                    |
| 369. |                                                          | Verona medical interview classification system - VR-MICS (English) - Doctor                             | Del Piccolo, L. <sup>297</sup>            | 104                   | not assessed                          | fair                     | not assessed                       | not assessed                      | poor                                 | not assessed                        | poor                                     | not assessed                        | not assessed                    |
| 370. |                                                          | Verona medical interview classification system - VR-MICS (English) - Patient                            | Del Piccolo, L. <sup>297</sup>            | 105                   | not assessed                          | fair                     | not assessed                       | not assessed                      | poor                                 | not assessed                        | poor                                     | not assessed                        | not assessed                    |
| 371. | Veterans Affairs Outpatient Community Services           | Veterans Affairs Outpatient Community Services                                                          | Haggerty <sup>70</sup>                    | 481                   | excellent                             | not assessed             | not assessed                       | not assessed                      | excellent                            | not assessed                        | not assessed                             | not assessed                        | not assessed                    |
| 372. |                                                          |                                                                                                         | Haggerty <sup>43</sup>                    | 485                   | excellent                             | not assessed             | not assessed                       | not assessed                      | excellent                            | not assessed                        | not assessed                             | not assessed                        | not assessed                    |
| 373. | Wake Forest Physician Trust Scale                        | Wake Forest Physician Trust Scale                                                                       | Bachinger <sup>298</sup>                  | 414                   | excellent                             | not assessed             | not assessed                       | excellent                         | excellent                            | good                                | fair                                     | not assessed                        | not assessed                    |
| 374. |                                                          |                                                                                                         | Hall <sup>299</sup>                       | 490                   | excellent                             | not assessed             | not assessed                       | excellent                         | excellent                            | not assessed                        | not assessed                             | not assessed                        | not assessed                    |
| 375. |                                                          |                                                                                                         | Hall <sup>299</sup>                       | 491                   | excellent                             | good                     | not assessed                       | excellent                         | excellent                            | not assessed                        | not assessed                             | not assessed                        | not assessed                    |
| 376. | Working Alliance Inventory (WAI)                         | Working Alliance Inventory (WAI)                                                                        | Bale <sup>111</sup>                       | 419                   | fair                                  | not assessed             | not assessed                       | not assessed                      | poor                                 | good                                | not assessed                             | not assessed                        | not assessed                    |
| 377. |                                                          | Working Alliance Inventory-36                                                                           | Hatcher <sup>300</sup>                    | 494                   | not assessed                          | not assessed             | not assessed                       | excellent                         | good                                 | good                                | not assessed                             | not assessed                        | not assessed                    |

|      | Index Instrument<br>(209 index instruments) | Instrument Name and Version<br>(379 validations studies) | Reference Study<br>(300 articles) | Study<br>Code | Internal consistency<br>score | Reliability score | Measurement error<br>score | Content validity<br>score | Structural validity<br>score | Construct validity<br>score | Cross-cultural<br>validity score | Criterion validity<br>score | Responsiveness<br>score |
|------|---------------------------------------------|----------------------------------------------------------|-----------------------------------|---------------|-------------------------------|-------------------|----------------------------|---------------------------|------------------------------|-----------------------------|----------------------------------|-----------------------------|-------------------------|
| 378. |                                             | Working Alliance Inventory-RS                            | Hatcher <sup>300</sup>            | 496           | good                          | poor              | not assessed               | excellent                 | good                         | good                        | not assessed                     | not assessed                | not assessed            |
| 379. |                                             | Working Alliance Inventory-S                             | Hatcher <sup>300</sup>            | 495           | not assessed                  | not assessed      | not assessed               | excellent                 | good                         | good                        | not assessed                     | not assessed                | not assessed            |

\* Index instruments are the main instruments validated in studies included in the review; other instruments used as gold standard for criterion validity or comparators to test convergent/divergent validity are not presented in the summary

\*\* Assumed when not specified in the paper

^ described other instruments but only tested for the main instrument measuring inter-organizational linkages in general practice (GCP-LI); no psychometric properties for the other 3 tools (which were used to validate the GCP-LI)

^^ described other instruments but analysis was only performed using the combined items in the Process and Outcome index tools

## References

- Misrahi D, Verdoux H, Lancon C, Bayle F. The 4-Point ordinal Alliance Self-report: a self-report questionnaire for assessing therapeutic relationships in routine mental health. *Comprehensive psychiatry*. Mar-Apr 2009;50(2):181-185.
- Agnew-Davies R, Stiles WB, Hardy GE, Barkham M, Shapiro DA. Alliance structure assessed by the Agnew Relationship Measure (ARM). *The British journal of clinical psychology / the British Psychological Society*. May 1998;37 ( Pt 2):155-172.
- Stiles WB, Agnew-Davies R, Barkham M, et al. Convergent validity of the Agnew Relationship Measure and the Working Alliance Inventory. *Psychological assessment*. Jun 2002;14(2):209-220.
- Durbin J, Goering P, Streiner DL, Pink G. Continuity of care: validation of a new self-report measure for individuals using mental health services. *The journal of behavioral health services & research*. Jul-Sep 2004;31(3):279-296.
- Joyce AS, Adair CE, Wild TC, et al. Continuity of care: validation of a self-report measure to assess client perceptions of mental health service delivery. *Community mental health journal*. Apr 2010;46(2):192-208.
- Safran DG, Karp M, Coltin K, et al. Measuring patients' experiences with individual primary care physicians. Results of a statewide demonstration project. *Journal of general internal medicine*. Jan 2006;21(1):13-21.
- Wholey DR, Zhu X, Knoke D, Shah P, Zellmer-Bruhn M, Witheridge TF. The teamwork in assertive community treatment (TACT) scale: development and validation. *Psychiatric services (Washington, D.C.)*. Nov 2012;63(11):1108-1117.
- Bonomi AE, Wagner EH, Glasgow RE, VonKorff M. Assessment of chronic illness care (ACIC): a practical tool to measure quality improvement. *Health services research*. Jun 2002;37(3):791-820.
- Cramm JM, Strating MM, Tsiachristas A, Nieboer AP. Development and validation of a short version of the Assessment of Chronic Illness Care (ACIC) in Dutch disease management programs. *Health and quality of life outcomes*. 2011;9:49.
- Sullivan JL, Meterko M, Baker E, et al. Reliability and validity of a person-centered care staff survey in veterans health administration community living centers. *The Gerontologist*. Aug 2013;53(4):596-607.
- Barkham M, Agnew RM, Culverwell A. The California Psychotherapy Alliance Scales: a pilot study of dimensions and elements. *The British journal of medical psychology*. Jun 1993;66 ( Pt 2):157-165.
- Gaston L. Reliability and criterion-related validity of the California Psychotherapy Alliance Scales—patient version. *Psychological Assessment: A Journal of Consulting and Clinical Psychology*. 1991;3(1):68-74.
- Dobrow MJ, Paszat L, Golden B, et al. Measuring Integration of Cancer Services to Support Performance Improvement: The CSI Survey. *Healthcare policy = Politiques de sante*. Aug 2009;5(1):35-53.
- Bull MJ, Luo D, Maruyama GM. Measuring continuity of elders' posthospital care. *Journal of nursing measurement*. Summer 2000;8(1):41-60.
- Seys D, Deneckere S, Sermeus W, et al. The Care Process Self-Evaluation Tool: a valid and reliable instrument for measuring care process organization of health care teams. *BMC health services research*. 2013;13:325.
- Vanhaecht K, De Witte K, Depreitere R, et al. Development and validation of a care process self-evaluation tool. *Health services management research : an official journal of the Association of University Programs in Health Administration / HSMC, AUPHA*. Aug 2007;20(3):189-202.
- Coleman EA, Mahoney E, Parry C. Assessing the quality of preparation for posthospital care from the patient's perspective: the care transitions measure. *Medical care*. Mar 2005;43(3):246-255.
- Coleman EA, Smith JD, Frank JC, Eilertsen TB, Thiare JN, Kramer AM. Development and testing of a measure designed to assess the quality of care transitions. *International journal of integrated care*. 2002;2:e02.
- Shadmi E, Zisberg A, Coleman EA. Translation and validation of the Care Transition Measure into Hebrew and Arabic. *International journal for quality in health care : journal of the International Society for Quality in Health Care / ISQua*. Apr 2009;21(2):97-102.
- Parry C, Mahoney E, Chalmers SA, Coleman EA. Assessing the quality of transitional care: further applications of the care transitions measure. *Medical care*. Mar 2008;46(3):317-322.
- Bakshi AB, Wee SL, Tay C, et al. Validation of the care transition measure in multi-ethnic South-East Asia in Singapore. *BMC health services research*. 2012;12:256.
- Cramm JM, Strating MM, Nieboer AP. Validation of the caregivers' satisfaction with Stroke Care Questionnaire: C-SASC hospital scale. *Journal of neurology*. Jun 2011;258(6):1008-1012.
- Gaugler JE, Hobday JV, Savik K. The CARES((R)) Observational Tool: a valid and reliable instrument to assess person-centered dementia care. *Geriatric nursing (New York, N.Y.)*. May-Jun 2013;34(3):194-198.
- Bakker FC, Persoon A, Schoon Y, Marcel G, Rikkert O. The carewell in hospital questionnaire: A measure of frail elderly inpatient experiences with individualized and integrated hospital care. *Journal of hospital medicine : an official publication of the Society of Hospital Medicine*. May 2014;9(5):324-329.
- Duffy JR, Brewer BB, Weaver MT. Revision and psychometric properties of the caring assessment tool. *Clinical nursing research*. Feb 2014;23(1):80-93.
- Duffy JR, Hoskins L, Seifert RF. Dimensions of caring: psychometric evaluation of the caring assessment tool. *ANS. Advances in nursing science*. Jul-Sep 2007;30(3):235-245.
- Hadjistavropoulos HD, Sagan M, Bierlein C, Lawson K. Development of a case management quality questionnaire. *Care management journals : Journal of case management ; The journal of long term home health care*. Spring 2003;4(1):8-17.
- McGuinness C, Sibthorpe B. Development and initial validation of a measure of coordination of health care. *International journal for quality in health care : journal of the International Society for Quality in Health Care / ISQua*. Aug 2003;15(4):309-318.
- de Witte L, Schoot T, Proot I. Development of the client-centred care questionnaire. *Journal of advanced nursing*. Oct 2006;56(1):62-68.
- Cott CA, Teare G, McGilton KS, Lineker S. Reliability and construct validity of the client-centred rehabilitation questionnaire. *Disability and rehabilitation*. Nov 30 2006;28(22):1387-1397.
- Briner M, Kessler O, Pfeiffer Y, Wehner T, Manser T. Assessing hospitals' clinical risk management: Development of a monitoring instrument. *BMC health services research*. 2010;10:337.
- Hibbard JH, Collins PA, Mahoney E, Baker LH. The development and testing of a measure assessing clinician beliefs about patient self-management. *Health expectations : an international journal of public participation in health care and health policy*. Mar 2010;13(1):65-72.
- Barr PJ, Thompson R, Walsh T, Grande SW, Ozanne EM, Elwyn G. The psychometric properties of CollaboRATE: a fast and frugal patient-reported measure of the shared decision-making process. *Journal of medical Internet research*. 2014;16(1):e2.
- Elwyn G, Barr PJ, Grande SW, Thompson R, Walsh T, Ozanne EM. Developing CollaboRATE: a fast and frugal patient-reported measure of shared decision making in clinical encounters. *Patient education and counseling*. Oct 2013;93(1):102-107.
- Baggs JG. Development of an instrument to measure collaboration and satisfaction about care decisions. *Journal of advanced nursing*. Jul 1994;20(1):176-182.
- Wener ME, Schonwetter DJ, Mazurat N. Developing new dental communication skills assessment tools by including patients and other stakeholders. *Journal of dental education*. Dec 2011;75(12):1527-1541.
- Schonwetter DJ, Wener ME, Mazurat N. Determining the validity and reliability of clinical communication assessment tools for dental patients and students. *Journal of dental education*. Oct 2012;76(10):1276-1290.
- Winning TA, Kinnell A, Wener ME, Mazurat N, D JS. Validity of scores from communication skills instruments for patients and their dental student-clinicians. *European journal of dental education : official journal of the Association for Dental Education in Europe*. May 2013;17(2):93-100.
- Beaulieu MD, Haggerty JL, Beaulieu C, et al. Interpersonal communication from the patient perspective: comparison of primary healthcare evaluation instruments. *Healthcare policy = Politiques de sante*. Dec 2011;7(Spec Issue):108-123.
- Flocke SA. Measuring attributes of primary care: development of a new instrument. *The Journal of family practice*. Jul 1997;45(1):64-74.
- Haggerty JL, Beaulieu MD, Pineault R, et al. Comprehensiveness of care from the patient perspective: comparison of primary healthcare evaluation instruments. *Healthcare policy = Politiques de sante*. Dec 2011;7(Spec Issue):154-166.
- Haggerty JL, Burge F, Beaulieu MD, et al. Validation of instruments to evaluate primary healthcare from the patient perspective: overview of the method. *Healthcare policy = Politiques de sante*. Dec 2011;7(Spec Issue):31-46.
- Haggerty JL, Burge F, Pineault R, et al. Management continuity from the patient perspective: comparison of primary healthcare evaluation instruments. *Healthcare policy = Politiques de sante*. Dec 2011;7(Spec Issue):139-153.
- Burge F, Haggerty JL, Pineault R, et al. Relational continuity from the patient perspective: comparison of primary healthcare evaluation instruments. *Healthcare policy = Politiques de sante*. Dec 2011;7(Spec Issue):124-138.
- Chavez LM, Canino G, Shrout PE, Barrio C, Ware NC. Psychometric evaluation of the Spanish version of CONNECT: a measure of continuity of care in mental health services. *International journal of methods in psychiatric research*. 2007;16(1):23-33.
- Ware NC, Dickey B, Tugenberg T, McHorney CA. CONNECT: a measure of continuity of care in mental health services. *Mental health services research*. Dec 2003;5(4):209-221.
- Fung CS, Hua A, Tam L, Mercer SW. Reliability and validity of the Chinese version of the CARE Measure in a primary care setting in Hong Kong. *Family practice*. Oct 2009;26(5):398-406.
- Mercer SW, Maxwell M, Heaney D, Watt GC. The consultation and relational empathy (CARE) measure: development and preliminary validation and reliability of an empathy-based consultation process measure. *Family practice*. Dec 2004;21(6):699-705.

49. Mercer SW, Murphy DJ. Validity and reliability of the CARE Measure in secondary care. *Clinical Governance: An International Journal*. 2008;13(4):269-283.
50. Mercer SW, Neumann M, Wirtz M, Fitzpatrick B, Vojt G. General practitioner empathy, patient enablement, and patient-reported outcomes in primary care in an area of high socio-economic deprivation in Scotland--a pilot prospective study using structural equation modeling. *Patient education and counseling*. Nov 2008;73(2):240-245.
51. Mercer SW HD, Murray A, Murphy DJ, Eva HW. . Capturing patients' views on communication with anaesthetists: the CARE Measure. . *Clin Gov Int J*. 2008;13:128-137.
52. Eisen SV, Shaul JA, Leff HS, Stringfellow V, Clarridge BR, Cleary PD. Toward a national consumer survey: evaluation of the CABHS and MHSIP instruments. *The journal of behavioral health services & research*. Aug 2001;28(3):347-369.
53. Arah OA, ten Asbroek AH, Delnoij DM, et al. Psychometric properties of the Dutch version of the Hospital-level Consumer Assessment of Health Plans Survey instrument. *Health services research*. Feb 2006;41(1):284-301.
54. Scholle SH, Vuong O, Ding L, et al. Development of and field test results for the CAHPS PCMH Survey. *Medical care*. Nov 2012;50 Suppl:S2-10.
55. Gallagher P, Ding L, Ham HP, Schor EL, Hays RD, Cleary PD. Development of a new patient-based measure of pediatric ambulatory care. *Pediatrics*. Nov 2009;124(5):1348-1354.
56. Hargraves JL, Hays RD, Cleary PD. Psychometric properties of the Consumer Assessment of Health Plans Study (CAHPS) 2.0 adult core survey. *Health services research*. Dec 2003;38(6 Pt 1):1509-1527.
57. Hays RD, Shaul JA, Williams VS, et al. Psychometric properties of the CAHPS 1.0 survey measures. Consumer Assessment of Health Plans Study. *Medical care*. Mar 1999;37(3 Suppl):Ms22-31.
58. Solomon LS, Hays RD, Zaslavsky AM, Ding L, Cleary PD. Psychometric properties of a group-level Consumer Assessment of Health Plans Study (CAHPS) instrument. *Medical care*. Jan 2005;43(1):53-60.
59. Clark C, Young MS, Jackson E, et al. Consumer perceptions of integrated trauma-informed services among women with co-occurring disorders. *The journal of behavioral health services & research*. Jan 2008;35(1):71-90.
60. Howie JG, Heaney DJ, Maxwell M, Walker JJ, Freeman GK. Developing a 'consultation quality index' (CQI) for use in general practice. *Family practice*. Dec 2000;17(6):455-461.
61. Damman OC, Hendriks M, Sixma HJ. Towards more patient centred healthcare: A new Consumer Quality Index instrument to assess patients' experiences with breast care. *European journal of cancer (Oxford, England : 1990)*. Jun 2009;45(9):1569-1577.
62. Berendsen AJ, Groenier KH, de Jong GM, et al. Assessment of patient's experiences across the interface between primary and secondary care: Consumer Quality Index Continuum of care. *Patient education and counseling*. Oct 2009;77(1):123-127.
63. Triemstra M, Winters S, Kool RB, Wieggers TA. Measuring client experiences in long-term care in the Netherlands: a pilot study with the Consumer Quality Index Long-term Care. *BMC health services research*. 2010;10:95.
64. Booij JC, Zegers M, Evers PM, Hendriks M, Delnoij DM, Rademakers JJ. Improving cancer patient care: development of a generic cancer consumer quality index questionnaire for cancer patients. *BMC cancer*. 2013;13:203.
65. Stubbe JH, Brouwer W, Delnoij DM. Patients' experiences with quality of hospital care: the Consumer Quality Index Cataract Questionnaire. *BMC ophthalmology*. 2007;7:14.
66. Stubbe JH, Gelsema T, Delnoij DM. The Consumer Quality Index Hip Knee Questionnaire measuring patients' experiences with quality of care after a total hip or knee arthroplasty. *BMC health services research*. 2007;7:60.
67. Sweeney A, Rose D, Clement S, et al. Understanding service user-defined continuity of care and its relationship to health and social measures: a cross-sectional study. *BMC health services research*. 2012;12:145.
68. Rose D, Sweeney A, Leese M, et al. Developing a user-generated measure of continuity of care: brief report. *Acta psychiatrica Scandinavica*. Apr 2009;119(4):320-324.
69. Tobon JI, Reid GJ, Goffin RD. Continuity of Care in Children's Mental Health: Development of a Measure. *Administration and policy in mental health*. Sep 28 2013.
70. Haggerty JL, Roberge D, Freeman GK, Beaulieu C, Breton M. Validation of a generic measure of continuity of care: when patients encounter several clinicians. *Annals of family medicine*. Sep-Oct 2012;10(5):443-451.
71. Schaefer JA, Cronkite R, Ingdomnukul E. Assessing continuity of care practices in substance use disorder treatment programs. *Journal of studies on alcohol*. Jul 2004;65(4):513-520.
72. Block M, Ehrenworth JF, Cuce VM, et al. Measuring handoff quality in labor and delivery: development, validation, and application of the Coordination of Handoff Effectiveness Questionnaire (CHEQ). *Joint Commission journal on quality and patient safety / Joint Commission Resources*. May 2013;39(5):213-220.
73. Wenghofer EF, Williams AP, Klass DJ, Faulkner D. Physician-patient encounters: the structure of performance in family and general office practice. *The Journal of continuing education in the health professions*. Fall 2006;26(4):285-293.
74. Aller MB, Vargas I, Garcia-Subirats I, et al. A tool for assessing continuity of care across care levels: an extended psychometric validation of the CCAENA questionnaire. *International journal of integrated care*. 2013;13:e050.
75. Doorenbos AZ, Schim SM, Berkert R, Borse NN. Psychometric evaluation of the cultural competence assessment instrument among healthcare providers. *Nursing research*. Sep-Oct 2005;54(5):324-331.
76. Ahgren B, Axelsson SB, Axelsson R. Evaluating intersectoral collaboration: a model for assessment by service users. *International journal of integrated care*. 2009;9:e03.
77. Dolovich LR, Nair KM, Ciliska DK, et al. The Diabetes Continuity of Care Scale: the development and initial evaluation of a questionnaire that measures continuity of care from the patient perspective. *Health & social care in the community*. Nov 2004;12(6):475-487.
78. Katapodi MC, Pierce PF, Facione NC. Distrust, predisposition to use health services and breast cancer screening: results from a multicultural community-based survey. *International journal of nursing studies*. Aug 2010;47(8):975-983.
79. de Monchy C, Richardson R, Brown RA, Harden RM. Measuring attitudes of doctors: the doctor-patient (DP) rating. *Medical education*. May 1988;22(3):231-239.
80. McGovern MP, Urada D, Lambert-Harris C, Sullivan ST, Mazade NA. Development and initial feasibility of an organizational measure of behavioral health integration in medical care settings. *Journal of substance abuse treatment*. Dec 2012;43(4):402-409.
81. Wilkerson L, Fung CC, May W, Elliott D. Assessing patient-centered care: one approach to health disparities education. *Journal of general internal medicine*. May 2010;25 Suppl 2:S86-90.
82. Dancet EA, Ameye L, Sermeus W, et al. The ENDOCARE questionnaire (ECQ): a valid and reliable instrument to measure the patient-centeredness of endometriosis care in Europe. *Human reproduction (Oxford, England)*. Nov 2011;26(11):2988-2999.
83. Haggerty JL, Levesque JF, Santor DA, et al. Accessibility from the patient perspective: comparison of primary healthcare evaluation instruments. *Healthcare policy = Politiques de sante*. Dec 2011;7(Spec Issue):94-107.
84. Gulliford MC, Naithani S, Morgan M. Measuring continuity of care in diabetes mellitus: an experience-based measure. *Annals of family medicine*. Nov-Dec 2006;4(6):548-555.
85. Martin LR, DiMatteo MR, Lepper HS. Facilitation of patient involvement in care: development and validation of a scale. *Behavioral medicine (Washington, D.C.)*. Fall 2001;27(3):111-120.
86. Casarett D, Pickard A, Bailey FA, et al. A nationwide VA palliative care quality measure: the family assessment of treatment at the end of life. *Journal of palliative medicine*. Jan-Feb 2008;11(1):68-75.
87. Reid RC, Chappell NL, Gish JA. Measuring family perceived involvement in individualized long-term care. *Dementia*. February 1, 2007 2007;6(1):89-104.
88. Clayton MF, Latimer S, Dunn TW, Haas L. Assessing patient-centered communication in a family practice setting: how do we measure it, and whose opinion matters? *Patient education and counseling*. Sep 2011;84(3):294-302.
89. Krupat E, Frankel R, Stein T, Irish J. The Four Habits Coding Scheme: validation of an instrument to assess clinicians' communication behavior. *Patient education and counseling*. Jul 2006;62(1):38-45.
90. Jaturapatporn D, Hathirat S, Manataweewat B, et al. Reliability and validity of a Thai version of the General Practice Assessment Questionnaire (GPAQ). *Journal of the Medical Association of Thailand = Chotmaihet thangphaet*. Sep 2006;89(9):1491-1496.
91. Mead N, Bower P, Roland M. The General Practice Assessment Questionnaire (GPAQ) - development and psychometric characteristics. *BMC family practice*. 2008;9:13.
92. Zwier G. A standardised and validated patient survey in primary care: introducing the New Zealand General Practice Assessment Questionnaire (NZGPAQ). *The New Zealand medical journal*. Apr 5 2013;126(1372):47-54.
93. Jayasinghe UW, Proudfoot J, Holton C, et al. Chronically ill Australians' satisfaction with accessibility and patient-centredness. *International journal for quality in health care : journal of the International Society for Quality in Health Care / ISQua*. Apr 2008;20(2):105-114.
94. Bower P, Mead N, Roland M. What dimensions underlie patient responses to the General Practice Assessment Survey? A factor analytic study. *Family practice*. Oct 2002;19(5):489-495.
95. Ramsay J, Campbell JL, Schroter S, Green J, Roland M. The General Practice Assessment Survey (GPAS): tests of data quality and measurement properties. *Family practice*. Oct 2000;17(5):372-379.
96. Amoroso C, Proudfoot J, Bubner T, et al. Validation of an instrument to measure inter-organisational linkages in general practice. *International journal of integrated care*. 2007;7:e46.
97. Lyratzopoulos G, Elliott MN, Barbiere JM, et al. How can health care organizations be reliably compared?: Lessons from a national survey of patient experience. *Medical care*. Aug 2011;49(8):724-733.
98. Paulo de Almeida Tavares J, Leite da Silva A, Sa-Couto P, Boltz M, Capezuti E. Validation of geriatric care environment scale in portuguese nurses. *Current gerontology and geriatrics research*. 2013;2013:426596.
99. Kim H, Capezuti E, Boltz M, Fairchild S, Fulmer T, Mezey M. Factor structure of the geriatric care environment scale. *Nursing research*. Sep-Oct 2007;56(5):339-347.
100. Gan C, Campbell KA, Snider A, Cohen S, Hubbard J. Giving Youth a Voice (GYV): a measure of youths' perceptions of the client-centredness of rehabilitation services. *Canadian journal of occupational therapy. Revue canadienne d'ergotherapie*. Apr 2008;75(2):96-104.
101. Thompson HS, Valdimarsdottir HB, Winkel G, Jandorf L, Redd W. The Group-Based Medical Mistrust Scale: psychometric properties and association with breast cancer screening. *Preventive medicine*. Feb 2004;38(2):209-218.
102. Horwitz LI, Dombroski J, Murphy TE, Farnan JM, Johnson JK, Arora VM. Validation of a handoff assessment tool: the Handoff CEX. *Journal of clinical nursing*. May 2013;22(9-10):1477-1486.
103. Horwitz LI, Rand D, Staisiunas P, et al. Development of a handoff evaluation tool for shift-to-shift physician handoffs: the Handoff CEX. *Journal of hospital medicine : an official publication of the Society of Hospital Medicine*. Apr 2013;8(4):191-200.
104. Pezzolesi C, Manser T, Schifano F, et al. Human factors in clinical handover: development and testing of a 'handover performance tool' for doctors' shift handovers. *International journal for quality in health care : journal of the International Society for Quality in Health Care / ISQua*. Feb 2013;25(1):58-65.

105. Fiscella K, Franks P, Srinivasan M, Kravitz RL, Epstein R. Ratings of physician communication by real and standardized patients. *Annals of family medicine*. Mar-Apr 2007;5(2):151-158.
106. Gremigni P, Sommaruga M, Peltenburg M. Validation of the Health Care Communication Questionnaire (HCCQ) to measure outpatients' experience of communication with hospital staff. *Patient education and counseling*. Apr 2008;71(1):57-64.
107. Bova C, Fennie KP, Watrous E, Dieckhaus K, Williams AB. The health care relationship (HCR) trust scale: development and psychometric evaluation. *Research in nursing & health*. Oct 2006;29(5):477-488.
108. Rose A, Peters N, Shea JA, Armstrong K. Development and testing of the health care system distrust scale. *Journal of general internal medicine*. Jan 2004;19(1):57-63.
109. Kowalyk KM, Hadjistavropoulos HD, Biem HJ. Measuring continuity of care for cardiac patients: development of a patient self-report questionnaire. *The Canadian journal of cardiology*. Feb 2004;20(2):205-212.
110. Hadjistavropoulos HD, Biem HJ, Kowalyk KM. Measurement of continuity of care in cardiac patients: reliability and validity of an in-person questionnaire. *The Canadian journal of cardiology*. Jul 2004;20(9):883-891.
111. Bale R, Catty J, Watt H, Greenwood N, Burns T. Measures of the therapeutic relationship in severe psychotic illness: a comparison of two scales. *The International journal of social psychiatry*. May 2006;52(3):256-266.
112. De Weert-Van Oene GH, De Jong CA, Jorg F, Schrijvers GJ. The Helping Alliance Questionnaire: psychometric properties in patients with substance dependence. *Substance use & misuse*. Sep 1999;34(11):1549-1569.
113. Nie Y, Mao X, Cui H, He S, Li J, Zhang M. Hospital survey on patient safety culture in China. *BMC health services research*. 2013;13:228.
114. Browne G, Roberts J, Gafni A, Byrne C, Kertyzia J, Loney P. Conceptualizing and validating the human services integration measure. *International journal of integrated care*. 2004;4:e03.
115. Burns T, Catty J, White S, et al. Continuity of care in mental health: understanding and measuring a complex phenomenon. *Psychological medicine*. Feb 2009;39(2):313-323.
116. Batterham R, Southern D, Appleby N, et al. Construction of a GP integration model. *Social science & medicine (1982)*. Apr 2002;54(8):1225-1241.
117. Charalambous A, Chappell NL, Katajisto J, Suhonen R. The conceptualization and measurement of individualized care. *Geriatric nursing (New York, N.Y.)*. Jan-Feb 2012;33(1):17-27.
118. O'Rourke N, Chappell NL, Caspar S. Measurement and analysis of individualized care inventory responses comparing long-term care nurses and care aides. *The Gerontologist*. Dec 2009;49(6):839-846.
119. Suhonen R, Gustafsson ML, Katajisto J, Valimaki M, Leino-Kilpi H. Individualized care scale - nurse version: a Finnish validation study. *Journal of evaluation in clinical practice*. Feb 2010;16(1):145-154.
120. Suhonen R, Valimaki M, Katajisto J. Developing and testing an instrument for the measurement of individual care. *Journal of advanced nursing*. Nov 2000;32(5):1253-1263.
121. Suhonen R, Berg A, Idvall E, et al. Adapting the Individualized Care Scale for cross-cultural comparison. *Scandinavian journal of caring sciences*. Jun 2010;24(2):392-403.
122. Petroz U, Kennedy D, Webster F, Nowak A. Patients' perceptions of individualized care: evaluating psychometric properties and results of the individualized care scale. *The Canadian journal of nursing research = Revue canadienne de recherche en sciences infirmieres*. Jun 2011;43(2):80-100.
123. Blais MA. Development of an inpatient treatment alliance scale. *The Journal of nervous and mental disease*. Jul 2004;192(7):487-493.
124. Korner M, Wirtz MA. Development and psychometric properties of a scale for measuring internal participation from a patient and health care professional perspective. *BMC health services research*. 2013;13:374.
125. Hojat M, Mangione S, Nasca T, Cohen M, Gonnella J, Erdmann J. The Jefferson Scale of Physician Empathy: development and preliminary psychometric data. *Educational Psychology Measurement*. 2001;61:349-365.
126. Jones J, Barry MM. Developing a scale to measure synergy in health promotion partnerships. *Global health promotion*. Jun 2011;18(2):36-44.
127. Kim SC, Boren D, Solem SL. The Kim Alliance Scale: development and preliminary testing. *Clinical nursing research*. Aug 2001;10(3):314-331.
128. Byrne JM, Chang BK, Gilman SC, et al. The learners' perceptions survey-primary care: assessing resident perceptions of internal medicine continuity clinics and patient-centered care. *Journal of graduate medical education*. Dec 2013;5(4):587-593.
129. Campbell C, Lockyer J, Laidlaw T, Macleod H. Assessment of a matched-pair instrument to examine doctor-patient communication skills in practising doctors. *Medical education*. Feb 2007;41(2):123-129.
130. King M, Jones L, Richardson A, et al. The relationship between patients' experiences of continuity of cancer care and health outcomes: a mixed methods study. *British journal of cancer*. Feb 12 2008;98(3):529-536.
131. Siebes RC, Maassen GH, Wijnroks L, et al. Quality of paediatric rehabilitation from the parent perspective: validation of the short Measure of Processes of Care (MPOC-20) in the Netherlands. *Clinical rehabilitation*. Jan 2007;21(1):62-72.
132. King SM, Rosenbaum PL, King GA. Parents' perceptions of caregiving: development and validation of a measure of processes. *Developmental medicine and child neurology*. Sep 1996;38(9):757-772.
133. Tang HN, Chong WH, Goh W, Chan WP, Choo S. Evaluation of family-centred practices in the early intervention programmes for infants and young children in Singapore with Measure of Processes of Care for Service Providers and Measure of Beliefs about Participation in Family-Centred Service. *Child: care, health and development*. Jan 2012;38(1):54-60.
134. Himuro N, Kozuka N, Mori M. Measurement of family-centred care: translation, adaptation and validation of the Measure of Processes of Care (MPOC-56 and -20) for use in Japan. *Child: care, health and development*. May 2013;39(3):358-365.
135. Saloojee GM, Rosenbaum PR, Westaway MS, Stewart AV. Development of a measure of family-centred care for resource-poor South African settings: the experience of using a modified version of the MPOC-20. *Child: care, health and development*. Jan 2009;35(1):23-32.
136. Bjerre IM, Larsson M, Franzon AM, Nilsson MS, Stromberg G, Westbom LM. Measure of Processes of Care (MPOC) applied to measure parent's perception of the habilitation process in Sweden. *Child: care, health and development*. Mar 2004;30(2):123-130.
137. McConachie H, Logan S. Validation of the measure of processes of care for use when there is no Child Development Centre. *Child: care, health and development*. Jan 2003;29(1):35-45.
138. King S, King G, Rosenbaum P. Evaluating Health Service Delivery to Children With Chronic Conditions and Their Families: Development of a Refined Measure of Processes of Care (MPOC-20). *Children's Health Care*. 2004/03/01 2004;33(1):35-57.
139. Woodside JM, Rosenbaum PL, King SM, King GA. Family-Centered Service: Developing and Validating a Self-Assessment Tool for Pediatric Service Providers. *Children's Health Care*. 2001/09/01 2001;30(3):237-252.
140. Klassen AF, Dix D, Cano SJ, Papsdorf M, Sung L, Klaassen RJ. Evaluating family-centred service in paediatric oncology with the measure of processes of care (MPOC-20). *Child: care, health and development*. Jan 2009;35(1):16-22.
141. Goold SD, Fessler D, Moyer CA. A measure of trust in insurers. *Health services research*. Feb 2006;41(1):58-78.
142. Chappell NL, Reid RC, Gish JA. Staff-based measures of individualized care for persons with dementia in long-term care facilities. *Dementia*. November 1, 2007 2007;6(4):527-547.
143. Harley C, Adams J, Booth L, Selby P, Brown J, Velikova G. Patient experiences of continuity of cancer care: development of a new medical care questionnaire (MCQ) for oncology outpatients. *Value in health : the journal of the International Society for Pharmacoeconomics and Outcomes Research*. Nov-Dec 2009;12(8):1180-1186.
144. Cegala DJ, Coleman MT, Turner JW. The development and partial assessment of the medical communication competence scale. *Health communication*. 1998;10(3):261-288.
145. Cooley WC, McAllister JW, Sherrieb K, Clark RE. The Medical Home Index: development and validation of a new practice-level measure of implementation of the Medical Home model. *Ambulatory pediatrics : the official journal of the Ambulatory Pediatric Association*. Jul-Aug 2003;3(4):173-180.
146. Valentine NB, Bonsel GJ, Murray CJ. Measuring quality of health care from the user's perspective in 41 countries: psychometric properties of WHO's questions on health systems responsiveness. *Quality of life research : an international journal of quality of life aspects of treatment, care and rehabilitation*. Sep 2007;16(7):1107-1125.
147. Egede LE, Ellis C. Development and testing of the Multidimensional Trust in Health Care Systems Scale. *Journal of general internal medicine*. Jun 2008;23(6):808-815.
148. Bentler SE, Morgan RO, Virnig BA, Wolinsky FD. Evaluation of a patient-reported continuity of care model for older adults. *Quality of life research : an international journal of quality of life aspects of treatment, care and rehabilitation*. Feb 2014;23(1):185-193.
149. Uijen AA, Schellevis FG, van den Bosch WJ, Mokkink HG, van Weel C, Schers HJ. Nijmegen Continuity Questionnaire: development and testing of a questionnaire that measures continuity of care. *Journal of clinical epidemiology*. Dec 2011;64(12):1391-1399.
150. Uijen AA, Heintz CW, Schellevis FG, et al. Measurement properties of questionnaires measuring continuity of care: a systematic review. *PLoS one*. 2012;7(7):e42256.
151. Mueller C, Savik K. Identifying and validating the components of nursing practice models for long-term care facilities. *Research in gerontological nursing*. Oct 2010;3(4):270-281.
152. Elwyn G, Edwards A, Wensing M, Hood K, Atwell C, Grol R. Shared decision making: developing the OPTION scale for measuring patient involvement. *Quality & safety in health care*. Apr 2003;12(2):93-99.
153. Radwin L, Alster K, Rubin KM. Development and testing of the Oncology Patients' Perceptions of the Quality of Nursing Care Scale. *Oncology nursing forum*. Mar-Apr 2003;30(2):283-290.
154. Garratt AM, Bjaertnes OA, Krogstad U, Gulbrandsen P. The OutPatient Experiences Questionnaire (OPEQ): data quality, reliability, and validity in patients attending 52 Norwegian hospitals. *Quality & safety in health care*. Dec 2005;14(6):433-437.
155. Pett MA, Beck SL, Guo JW, et al. Confirmatory factor analysis of the pain care quality surveys (PainCQ(c)). *Health services research*. Jun 2013;48(3):1018-1038.
156. Beck SL, Towsley GL, Berry PH, Brant JM, Smith EM. Measuring the quality of care related to pain management: a multiple-method approach to instrument development. *Nursing research*. Mar-Apr 2010;59(2):85-92.
157. Beck SL, Towsley GL, Pett MA, et al. Initial Psychometric Properties of the Pain Care Quality Survey (PainCQ). *The journal of pain : official journal of the American Pain Society*. Dec 2010;11(12):1311-1319.
158. Seid M, Varni JW, Bermudez LO, et al. Parents' Perceptions of Primary Care: measuring parents' experiences of pediatric primary care quality. *Pediatrics*. Aug 2001;108(2):264-270.



159. Epstein EG, Miles A, Rovnyak V, Baernholdt M. Parents' perceptions of continuity of care in the neonatal intensive care unit: pilot testing an instrument and implications for the nurse-parent relationship. *The Journal of perinatal & neonatal nursing*. Apr-Jun 2013;27(2):168-175.
160. Fowles JB, Terry P, Xi M, Hibbard J, Bloom CT, Harvey L. Measuring self-management of patients' and employees' health: further validation of the Patient Activation Measure (PAM) based on its relation to employee characteristics. *Patient education and counseling*. Oct 2009;77(1):116-122.
161. Hibbard JH, Mahoney ER, Stockard J, Tusler M. Development and testing of a short form of the patient activation measure. *Health services research*. Dec 2005;40(6 Pt 1):1918-1930.
162. Hibbard JH, Stockard J, Mahoney ER, Tusler M. Development of the Patient Activation Measure (PAM): conceptualizing and measuring activation in patients and consumers. *Health services research*. Aug 2004;39(4 Pt 1):1005-1026.
163. Skolasky RL, Green AF, Scharfstein D, Boulton C, Reider L, Wegener ST. Psychometric properties of the patient activation measure among multimorbid older adults. *Health services research*. Apr 2011;46(2):457-478.
164. Balstad A, Springer P. Quantifying case management workloads: Development of the PACE tool. *Lippincott's case management : managing the process of patient care*. Nov-Dec 2006;11(6):291-302; quiz 303-294.
165. Gugiu C, Coryn CL, Applegate B. Structure and measurement properties of the Patient Assessment of Chronic Illness Care instrument. *Journal of evaluation in clinical practice*. Jun 2010;16(3):509-516.
166. Gugiu PC, Coryn C, Clark R, Kuehn A. Development and evaluation of the short version of the Patient Assessment of Chronic Illness Care instrument. *Chronic illness*. Dec 2009;5(4):268-276.
167. Cramm JM, Nieboer AP. Factorial validation of the Patient Assessment of Chronic Illness Care (PACIC) and PACIC short version (PACIC-S) among cardiovascular disease patients in the Netherlands. *Health and quality of life outcomes*. 2012;10:104.
168. Aragonés A, Schaefer EW, Stevens D, Gourevitch MN, Glasgow RE, Shah NR. Validation of the Spanish translation of the Patient Assessment of Chronic Illness Care (PACIC) survey. *Preventing chronic disease*. Oct 2008;5(4):A113.
169. Glasgow RE, Wagner EH, Schaefer J, Mahoney LD, Reid RJ, Greene SM. Development and validation of the Patient Assessment of Chronic Illness Care (PACIC). *Medical care*. May 2005;43(5):436-444.
170. Rosemann T, Laux G, Drossemeyer S, Gensichen J, Szecsenyi J. Evaluation of a culturally adapted German version of the Patient Assessment of Chronic Illness Care (PACIC 5A) questionnaire in a sample of osteoarthritis patients. *Journal of evaluation in clinical practice*. Oct 2007;13(5):806-813.
171. Wensing M, van Lieshout J, Jung HP, Hermsen J, Rosemann T. The Patients Assessment Chronic Illness Care (PACIC) questionnaire in The Netherlands: a validation study in rural general practice. *BMC health services research*. 2008;8:182.
172. Baker R, Preston C, Cheater F, Hearnshaw H. Measuring patients' attitudes to care across the primary/secondary interface: the development of the patient career diary. *Quality in health care : QHC*. Sep 1999;8(3):154-160.
173. Hadjistavropoulos H, Biem H, Sharpe D, Bourgault-Fagnou M, Janzen J. Patient perceptions of hospital discharge: reliability and validity of a Patient Continuity of Care Questionnaire. *International journal for quality in health care : journal of the International Society for Quality in Health Care / ISQua*. Oct 2008;20(5):314-323.
174. Steine S, Finset A, Laerum E. A new, brief questionnaire (PEQ) developed in primary health care for measuring patients' experience of interaction, emotion and consultation outcome. *Family practice*. Aug 2001;18(4):410-418.
175. Pettersen KI, Veenstra M, Guldvog B, Kolstad A. The Patient Experiences Questionnaire: development, validity and reliability. *International journal for quality in health care : journal of the International Society for Quality in Health Care / ISQua*. Dec 2004;16(6):453-463.
176. Constand MK, MacDermid JC, Law M, Dal Bello-Haas V. Patient-centered care and distal radius fracture outcomes: A prospective cohort study analysis. *Journal of hand therapy : official journal of the American Society of Hand Therapists*. Apr 23 2014.
177. Singer SJ, Friedberg MW, Kiang MV, Dunn T, Kuhn DM. Development and preliminary validation of the Patient Perceptions of Integrated Care survey. *Medical care research and review : MCRR*. Apr 2013;70(2):143-164.
178. Galassi JP, Schanberg R, Ware WB. The Patient Reactions Assessment: A brief measure of the quality of the patient-provider medical relationship. *Psychological Assessment*. 1992;4(3):346-351.
179. Kempainen JK, O'Brien L, Williams H, Evans L, Weiner KN, Holzemer WL. Quantifying patient engagement with nurses: validation of a scale with AIDS patients. *Outcomes management for nursing practice*. Oct-Dec 1999;3(4):167-174.
180. Ngorsuraches S, Lerkiatbundit S, Li SC, Treesak C, Sirithorn R, Korwittanakarn M. Development and validation of the patient trust in community pharmacists (TRUST-Ph) scale: results from a study conducted in Thailand. *Research in social & administrative pharmacy : RSAP*. Sep 2008;4(3):272-283.
181. Hannum Rose J, Bowman KF, O'Toole EE, et al. Caregiver objective burden and assessments of patient-centered, family-focused care for frail elderly veterans. *The Gerontologist*. Feb 2007;47(1):21-33.
182. Alexander JA, Paustian M, Wise CG, et al. Assessment and measurement of patient-centered medical home implementation: the BCBSM experience. *Annals of family medicine*. May-Jun 2013;11 Suppl 1:S74-81.
183. Chesser A, Reyes J, Woods NK, Williams K, Kraft R. Reliability in patient-centered observations of family physicians. *Family medicine*. Jun 2013;45(6):428-432.
184. Pedro J, Canavarró MC, Boivin J, Gameiro S. Positive experiences of patient-centred care are associated with intentions to comply with fertility treatment: findings from the validation of the Portuguese version of the PCQ-Infertility tool. *Human reproduction (Oxford, England)*. Sep 2013;28(9):2462-2472.
185. van der Eijk M, Faber MJ, Ummels I, Aarts JW, Munneke M, Bloem BR. Patient-centeredness in PD care: development and validation of a patient experience questionnaire. *Parkinsonism & related disorders*. Nov 2012;18(9):1011-1016.
186. van Empel IW, Aarts JW, Cohlen BJ, et al. Measuring patient-centredness, the neglected outcome in fertility care: a random multicentre validation study. *Human reproduction (Oxford, England)*. Oct 2010;25(10):2516-2526.
187. Henbest RJ, Stewart MA. Patient-centredness in the consultation. 1: A method for measurement. *Family practice*. Dec 1989;6(4):249-253.
188. Hwang JI. Development and testing of a patient-centred care competency scale for hospital nurses. *International journal of nursing practice*. Nov 13 2013.
189. de Kok M, Sixma HJ, van der Weijden T, et al. A patient-centred instrument for assessment of quality of breast cancer care: results of a pilot questionnaire. *Quality & safety in health care*. Dec 2010;19(6):e40.
190. Rolfe G. The Patient-Centredness Multi-Choice Questionnaire: developing an instrument for the measurement of patient-centredness in student nurses. *Journal of advanced nursing*. Jan 1993;18(1):120-126.
191. Ridd MJ, Lewis G, Peters TJ, Salisbury C. Patient-doctor depth-of-relationship scale: development and validation. *Annals of family medicine*. Nov-Dec 2011;9(6):538-545.
192. Van der Feltz-Cornelis CM, Van Oppen P, Van Marwijk HW, De Beurs E, Van Dyck R. A patient-doctor relationship questionnaire (PDRQ-9) in primary care: development and psychometric evaluation. *General hospital psychiatry*. Mar-Apr 2004;26(2):115-120.
193. Mingote Adan J, Moreno Jimenez B, Rodriguez Carvajal R, Galvez Herrero M, Ruiz Lopez P. Psychometric validation of the Spanish version of the Patient-Doctor Relationship Questionnaire (PDRQ). *Actas españolas de psiquiatria*. Mar-Apr 2009;37(2):94-100.
194. Juhnke C, Muhlbacher AC. Patient-centredness in integrated healthcare delivery systems - needs, expectations and priorities for organised healthcare systems. *International journal of integrated care*. 2013;13:e051.
195. Stewart AL, Napoles-Springer AM, Gregorich SE, Santoyo-Olsson J. Interpersonal processes of care survey: patient-reported measures for diverse groups. *Health services research*. Jun 2007;42(3 Pt 1):1235-1256.
196. Chao J. Continuity of care: incorporating patient perceptions. *Family medicine*. Sep-Oct 1988;20(5):333-337.
197. Carmen S, Teal S, Guzzetta CE. Development, testing, and national evaluation of a pediatric Patient-Family-Centered Care benchmarking survey. *Holistic nursing practice*. Mar-Apr 2008;22(2):61-74; quiz 75-66.
198. Moseley KL, Clark SJ, Gebremariam A, Sternthal MJ, Kemper AR. Parents' trust in their child's physician: using an adapted Trust in Physician Scale. *Ambulatory pediatrics : the official journal of the Ambulatory Pediatric Association*. Jan-Feb 2006;6(1):58-61.
199. Smith MY, Winkel G, Egert J, Diaz-Wionczek M, DuHamel KN. Patient-physician communication in the context of persistent pain: validation of a modified version of the patients' Perceived Involvement in Care Scale. *Journal of pain and symptom management*. Jul 2006;32(1):71-81.
200. Lerman CE, Brody DS, Caputo GC, Smith DG, Lazaro CG, Wolfson HG. Patients' Perceived Involvement in Care Scale: relationship to attitudes about illness and medical care. *Journal of general internal medicine*. Jan-Feb 1990;5(1):29-33.
201. Edvardsson D, Fetherstonhaugh D, Nay R, Gibson S. Development and initial testing of the Person-centered Care Assessment Tool (P-CAT). *International psychogeriatrics / IPA*. Feb 2010;22(1):101-108.
202. Sjogren K, Lindkvist M, Sandman PO, Zingmark K, Edvardsson D. Psychometric evaluation of the Swedish version of the Person-Centered Care Assessment Tool (P-CAT). *International psychogeriatrics / IPA*. Mar 2012;24(3):406-415.
203. Rokstad AM, Engedal K, Edvardsson D, Selbaek G. Psychometric evaluation of the Norwegian version of the Person-centred Care Assessment Tool. *International journal of nursing practice*. Feb 2012;18(1):99-105.
204. Nilsson A, Lindkvist M, Rasmussen BH, Edvardsson D. Measuring levels of person-centeredness in acute care of older people with cognitive impairment: evaluation of the POPAC scale. *BMC health services research*. 2013;13:327.
205. Edvardsson D, Nilsson A, Fetherstonhaugh D, Nay R, Crowe S. The person-centred care of older people with cognitive impairment in acute care scale (POPAC). *Journal of nursing management*. Jan 2013;21(1):79-86.
206. Holburn S, Jacobson JW, Vietze PM, Schwartz AA, Sersen E. Quantifying the process and outcomes of person-centered planning. *American journal of mental retardation : AJMR*. Sep 2000;105(5):402-416.
207. Edvardsson D, Koch S, Nay R. Psychometric evaluation of the English Language Person-Centered Climate Questionnaire--Patient version. *Western journal of nursing research*. Mar 2009;31(2):235-244.
208. Edvardsson D, Koch S, Nay R. Psychometric evaluation of the English language Person-centred Climate Questionnaire--staff version. *Journal of nursing management*. Jan 2010;18(1):54-60.
209. Edvardsson D, Sandman PO, Rasmussen B. Swedish language Person-centred Climate Questionnaire - patient version: construction and psychometric evaluation. *Journal of advanced nursing*. Aug 2008;63(3):302-309.
210. Bergland A, Kirkevold M, Edvardsson D. Psychometric properties of the Norwegian Person-centred Climate Questionnaire from a nursing home context. *Scandinavian journal of caring sciences*. Dec 2012;26(4):820-828.
211. Edvardsson D, Sandman PO, Rasmussen B. Construction and psychometric evaluation of the Swedish language Person-centred Climate Questionnaire - staff version. *Journal of nursing management*. Nov 2009;17(7):790-795.
212. Dow B, Fearn M, Haralambous B, Tinney J, Hill K, Gibson S. Development and initial testing of the Person-Centred Health Care for Older Adults Survey. *International psychogeriatrics / IPA*. Jul 2013;25(7):1065-1076.



213. White DL, Newton-Curtis L, Lyons KS. Development and initial testing of a measure of person-directed care. *The Gerontologist*. Jul 2008;48 Spec No 1:114-123.
214. Clark BE, Mount JK. Pharmacy Service Orientation: a measure of organizational culture in pharmacy practice sites. *Research in social & administrative pharmacy : RSAP*. Mar 2006;2(1):110-128.
215. Ryan ME, Collins FJ, Dowd JB, Pierce PK. Measuring patient satisfaction: a case study. *Journal of nursing care quality*. Jan 1995;9(2):44-53.
216. Nagpal K, Abboudi M, Fischler L, et al. Evaluation of postoperative handover using a tool to assess information transfer and teamwork. *Annals of surgery*. Apr 2011;253(4):831-837.
217. Grimmer K, Moss J. The development, validity and application of a new instrument to assess the quality of discharge planning activities from the community perspective. *International journal for quality in health care : journal of the International Society for Quality in Health Care / ISQua*. Apr 2001;13(2):109-116.
218. Safran DG, Kosinski M, Tarlov AR, et al. The Primary Care Assessment Survey: tests of data quality and measurement performance. *Medical care*. May 1998;36(5):728-739.
219. Shi L, Starfield B, Xu J. Validating the adult primary care assessment tool. *J Fam Pract*. 2001;50(2):161-175.
220. Jeon KY. Cross-cultural adaptation of the US consumer form of the short Primary Care Assessment Tool (PCAT): the Korean consumer form of the short PCAT (KC PCAT) and the Korean standard form of the short PCAT (KS PCAT). *Quality in primary care*. 2011;19(2):85-103.
221. Lee JH, Choi YJ, Sung NJ, et al. Development of the Korean primary care assessment tool--measuring user experience: tests of data quality and measurement performance. *International journal for quality in health care : journal of the International Society for Quality in Health Care / ISQua*. Apr 2009;21(2):103-111.
222. Cassady CE, Starfield B, Hurtado MP, Berk RA, Nanda JP, Friedenber LA. Measuring consumer experiences with primary care. *Pediatrics*. Apr 2000;105(4 Pt 2):998-1003.
223. Macinko J, Almeida C, de Sa PK. A rapid assessment methodology for the evaluation of primary care organization and performance in Brazil. *Health policy and planning*. May 2007;22(3):167-177.
224. Beehler GP, Funderburk JS, Possemato K, Dolla KM. Psychometric assessment of the Primary Care Behavioral Health Provider Adherence Questionnaire (PPAQ). *Translational behavioral medicine*. Dec 2013;3(4):379-391.
225. Tarrant C, Baker R, Colman AM, et al. The prostate care questionnaire for patients (PCQ-P): reliability, validity and acceptability. *BMC health services research*. 2009;9:199.
226. Yun YH, Kim SH, Lee KM, et al. Patient-reported assessment of quality care at end of life: development and validation of Quality Care Questionnaire-End of Life (QCQ-EOL). *European journal of cancer (Oxford, England : 1990)*. Sep 2006;42(14):2310-2317.
227. Wilde B, Larsson G, Larsson M, Starrin B. Quality of care. Development of a patient-centred questionnaire based on a grounded theory model. *Scandinavian journal of caring sciences*. 1994;8(1):39-48.
228. Sixma HJ, van Campen C, Kerssens JJ, Peters L. Quality of care from the perspective of elderly people: the QUOTE-elderly instrument. *Age and ageing*. Mar 2000;29(2):173-178.
229. van Campen C, Sixma HJ, Kerssens JJ, Peters L, Rasker JJ. Assessing patients' priorities and perceptions of the quality of health care: the development of the QUOTE-Rheumatic-Patients instrument. *British journal of rheumatology*. Apr 1998;37(4):362-368.
230. van Weert JC, Jansen J, de Bruijn GJ, Noordman J, van Dulmen S, Bensing JM. QUOTEchemo: a patient-centred instrument to measure quality of communication preceding chemotherapy treatment through the patient's eyes. *European journal of cancer (Oxford, England : 1990)*. Nov 2009;45(17):2967-2976.
231. van der Eijk I, Sixma H, Smeets T, et al. Quality of health care in inflammatory bowel disease: development of a reliable questionnaire (QUOTE-IBD) and first results. *The American journal of gastroenterology*. Dec 2001;96(12):3329-3336.
232. Nijkamp MD, Sixma HJ, Afman H, et al. Quality of care from the perspective of the cataract patient: the reliability and validity of the QUOTE-cataract. *The British journal of ophthalmology*. Aug 2002;86(8):840-842.
233. Curtis JR, Patrick DL, Engelberg RA, Norris K, Asp C, Byock I. A measure of the quality of dying and death. Initial validation using after-death interviews with family members. *Journal of pain and symptom management*. Jul 2002;24(1):17-31.
234. Sulmasy DP, McIlvane JM, Pasley PM, Rahn M. A scale for measuring patient perceptions of the quality of end-of-life care and satisfaction with treatment: the reliability and validity of QUEST. *Journal of pain and symptom management*. Jun 2002;23(6):458-470.
235. Engelberg R, Downey L, Curtis JR. Psychometric characteristics of a quality of communication questionnaire assessing communication about end-of-life care. *Journal of palliative medicine*. Oct 2006;9(5):1086-1098.
236. Steinhäuser KE, Voils CI, Bosworth H, Tulsy JA. Validation of a Measure of Family Experience of Patients With Serious Illness: The QUAL-E (Fam). *Journal of pain and symptom management*. May 22 2014.
237. Schroder A, Larsson BW, Ahlstrom G, Lundqvist LO. Psychometric properties of the instrument quality in psychiatric care and descriptions of quality of care among in-patients. *International journal of health care quality assurance*. 2010;23(6):554-570.
238. Shelton RC, Winkel G, Davis SN, et al. Validation of the group-based medical mistrust scale among urban black men. *Journal of general internal medicine*. Jun 2010;25(6):549-555.
239. Gulliford M, Cowie L, Morgan M. Relational and management continuity survey in patients with multiple long-term conditions. *Journal of health services research & policy*. Apr 2011;16(2):67-74.
240. Gallagher TJ, Hartung PJ, Gregory SW. Assessment of a measure of relational communication for doctor-patient interactions. *Patient education and counseling*. Dec 1 2001;45(3):211-218.
241. Gallagher TJ, Hartung PJ, Gerzina H, Gregory SW, Jr., Merolla D. Further analysis of a doctor-patient nonverbal communication instrument. *Patient education and counseling*. Jun 2005;57(3):262-271.
242. Shea JA, Micco E, Dean LT, McMurphy S, Schwartz JS, Armstrong K. Development of a revised Health Care System Distrust scale. *Journal of general internal medicine*. Jun 2008;23(6):727-732.
243. Shields CG, Franks P, Fiscella K, Meldrum S, Epstein RM. Rochester Participatory Decision-Making Scale (RPAD): reliability and validity. *Annals of family medicine*. Sep-Oct 2005;3(5):436-442.
244. Birnberg JM, Drum ML, Huang ES, et al. Development of a safety net medical home scale for clinics. *Journal of general internal medicine*. Dec 2011;26(12):1418-1425.
245. Ahgren B, Axelsson R. Evaluating integrated health care: a model for measurement. *International journal of integrated care*. 2005;5:e01; discussion e03, e09.
246. McGuire-Snieckus R, McCabe R, Catty J, Hansson L, Priebe S. A new scale to assess the therapeutic relationship in community mental health care: STAR. *Psychological medicine*. Jan 2007;37(1):85-95.
247. Tomes AE, Chee Peng Ng S. Service quality in hospital care: the development of an in-patient questionnaire. *International journal of health care quality assurance*. 1995;8(3):25-33.
248. Vandamme R, Leunis J. Development of a Multiple-item Scale for Measuring Hospital Service Quality. *International Journal of Service Industry Management*. 1993;4(3):30-49.
249. Babakus E, Mangold WG. Adapting the SERVQUAL scale to hospital services: an empirical investigation. *Health services research*. Feb 1992;26(6):767-786.
250. Hodgkinson K, Butow P, Hobbs KM, Hunt GE, Lo SK, Wain G. Assessing unmet supportive care needs in partners of cancer survivors: the development and evaluation of the Cancer Survivors' Partners Unmet Needs measure (CaSPUN). *Psycho-oncology*. Sep 2007;16(9):805-813.
251. Hodgkinson K, Butow P, Hunt GE, et al. The development and evaluation of a measure to assess cancer survivors' unmet supportive care needs: the CaSUN (Cancer Survivors' Unmet Needs measure). *Psycho-oncology*. Sep 2007;16(9):796-804.
252. Campbell HS, Hall AE, Sanson-Fisher RW, Barker D, Turner D, Taylor-Brown J. Development and validation of the Short-Form Survivor Unmet Needs Survey (SF-SUNS). *Supportive care in cancer : official journal of the Multinational Association of Supportive Care in Cancer*. Apr 2014;22(4):1071-1079.
253. Campbell HS, Sanson-Fisher R, Turner D, Hayward L, Wang XS, Taylor-Brown J. Psychometric properties of cancer survivors' unmet needs survey. *Supportive care in cancer : official journal of the Multinational Association of Supportive Care in Cancer*. Feb 2010;19(2):221-230.
254. Zwart DL, Langelaan M, van de Vooren RC, et al. Patient safety culture measurement in general practice. Clinimetric properties of 'SCOPE'. *BMC family practice*. 2011;12:117.
255. Omondi Aduda DS, Ouma C, Onyango R, Onyango M, Bertrand J. Systematic monitoring of male circumcision scale-up in Nyanza, Kenya: exploratory factor analysis of service quality instrument and performance ranking. *PloS one*. 2014;9(7):e101235.
256. Cooper S, Cant R, Porter J, et al. Rating medical emergency teamwork performance: development of the Team Emergency Assessment Measure (TEAM). *Resuscitation*. Apr 2010;81(4):446-452.
257. Taylor C, Brown K, Lamb B, Harris J, Sevdalis N, Green JS. Developing and testing TEAM (Team Evaluation and Assessment Measure), a self-assessment tool to improve cancer multidisciplinary teamwork. *Annals of surgical oncology*. Dec 2012;19(13):4019-4027.
258. Mack JW, Block SD, Nilsson M, et al. Measuring therapeutic alliance between oncologists and patients with advanced cancer: the Human Connection Scale. *Cancer*. Jul 15 2009;115(14):3302-3311.
259. Pinosof WM, Zinbarg R, Knobloch-Fedders LM. Factorial and construct validity of the revised short form integrative psychotherapy alliance scales for family, couple, and individual therapy. *Family process*. Sep 2008;47(3):281-301.
260. Radwin LE, Cabral HJ. Trust in Nurses Scale: construct validity and internal reliability evaluation. *Journal of advanced nursing*. Mar 2010;66(3):683-689.
261. Radwin LE, Washko M, Suchy KA, Tyman K. Development and pilot testing of four desired health outcomes scales. *Oncology nursing forum*. Jan 2005;32(1):92-96.
262. Hillen MA, Koning CC, Wilmink JW, et al. Assessing cancer patients' trust in their oncologist: development and validation of the Trust in Oncologist Scale (TiOS). *Supportive care in cancer : official journal of the Multinational Association of Supportive Care in Cancer*. Aug 2012;20(8):1787-1795.
263. Freburger JK, Callahan LF, Currey SS, Anderson LA. Use of the Trust in Physician Scale in patients with rheumatic disease: psychometric properties and correlates of trust in the rheumatologist. *Arthritis and rheumatism*. Feb 15 2003;49(1):51-58.
264. Thom DH, Ribisl KM, Stewart AL, Luke DA. Further validation and reliability testing of the Trust in Physician Scale. The Stanford Trust Study Physicians. *Medical care*. May 1999;37(5):510-517.
265. Anderson LA, Dedrick RF. Development of the Trust in Physician scale: a measure to assess interpersonal trust in patient-physician relationships. *Psychological reports*. Dec 1990;67(3 Pt 2):1091-1100.
266. Hall MA, Camacho F, Dugan E, Balkrishnan R. Trust in the medical profession: conceptual and measurement issues. *Health services research*. Oct 2002;37(5):1419-1439.

267. Tucker CM, Mirsu-Paun A, Van den Berg JJ, et al. Assessments for measuring patient-centered cultural sensitivity in community-based primary care clinics. *Journal of the National Medical Association*. Jun 2007;99(6):609-619.
268. Mirsu-Paun A, Tucker CM, Herman KC, Hernandez CA. Validation of a provider self-report inventory for measuring patient-centered cultural sensitivity in health care using a sample of medical students. *Journal of community health*. Apr 2010;35(2):198-207.
269. Adams R, Price K, Tucker G, Nguyen AM, Wilson D. The doctor and the patient--how is a clinical encounter perceived? *Patient education and counseling*. Jan 2012;86(1):127-133.
270. McLaughlin SE, Diener-West M, Indurkha A, Rubin H, Heckmann R, Boyle MP. Improving transition from pediatric to adult cystic fibrosis care: lessons from a national survey of current practices. *Pediatrics*. May 2008;121(5):e1160-1166.
271. Nuno-Solinis R, Berraondo Zabalegui I, Sauto Arce R, San Martin Rodriguez L, Toro Polanco N. Development of a questionnaire to assess interprofessional collaboration between two different care levels. *International journal of integrated care*. Apr 2013;13:e015.
272. Ouwens M, Hermens R, Hulscher M, et al. Development of indicators for patient-centred cancer care. *Supportive care in cancer : official journal of the Multinational Association of Supportive Care in Cancer*. Jan 2010;18(1):121-130.
273. Samele C, Gilvarry C, Walsh E, Manley C, van Os J, Murray R. Patients' perceptions of intensive case management. *Psychiatric services (Washington, D.C.)*. Nov 2002;53(11):1432-1437.
274. Shields L, Tanner A. Pilot study of a tool to investigate perceptions of family-centered care in different care settings. *Pediatric nursing*. May-Jun 2004;30(3):189-197.
275. Sidani S. Effects of patient-centered care on patient outcomes: an evaluation. *Research and theory for nursing practice*. 2008;22(1):24-37.
276. Straten GF, Friele RD, Groenewegen PP. Public trust in Dutch health care. *Social science & medicine (1982)*. Jul 2002;55(2):227-234.
277. Uyei J, Coetzee D, Macinko J, Weinberg SL, Guttmacher S. Measuring the degree of integrated tuberculosis and HIV service delivery in Cape Town, South Africa. *Health policy and planning*. Jan 2014;29(1):42-55.
278. Van den Broeck U, Spiessens C, Dancet E, et al. Patient evaluation of infertility management in an ISO 9001:2008-certified centre for reproductive medicine. *Reproductive biomedicine online*. Mar 2012;24(3):293-300.
279. Wei X, Barnsley J, Zakus D, Cockerill R, Glazier R, Sun X. Assessing continuity of care in a community diabetes program: initial questionnaire development and validation. *Journal of clinical epidemiology*. Sep 2008;61(9):925-931.
280. Zineldin M, Camgoz-Akdag H, Vasicheva V. Measuring, evaluating and improving hospital quality parameters/dimensions--an integrated healthcare quality approach. *International journal of health care quality assurance*. 2011;24(8):654-662.
281. de Kok M, Scholte RW, Sixma HJ, et al. The patient's perspective of the quality of breast cancer care. The development of an instrument to measure quality of care through focus groups and concept mapping with breast cancer patients. *European journal of cancer (Oxford, England : 1990)*. May 2007;43(8):1257-1264.
282. Grol R, de Maeseneer J, Whitfield M, Mookink H. Disease-centred versus patient-centred attitudes: comparison of general practitioners in Belgium, Britain and The Netherlands. *Family practice*. Jun 1990;7(2):100-103.
283. Kelly JJ, Njuki F, Lane PL, McKinley RK. Design of a questionnaire to measure trust in an emergency department. *Academic emergency medicine : official journal of the Society for Academic Emergency Medicine*. Feb 2005;12(2):147-151.
284. Leisen B, Hyman MR. An improved scale for assessing patients' trust in their physician. *Health marketing quarterly*. 2001;19(1):23-42.
285. Temkin-Greener H, Gross D, Kunitz SJ, Mukamel D. Measuring interdisciplinary team performance in a long-term care setting. *Medical care*. May 2004;42(5):472-481.
286. Little P, Everitt H, Williamson I, et al. Observational study of effect of patient centredness and positive approach on outcomes of general practice consultations. *BMJ (Clinical research ed.)*. Oct 20 2001;323(7318):908-911.
287. Thom DH, Wong ST, Guzman D, et al. Physician trust in the patient: development and validation of a new measure. *Annals of family medicine*. Mar-Apr 2011;9(2):148-154.
288. Wressle E, Eriksson L, Fahlander A, et al. Relatives' perspective on the quality of geriatric care and rehabilitation--development and testing of a questionnaire. *Scandinavian journal of caring sciences*. Dec 2008;22(4):590-595.
289. Young JM, Walsh J, Butow PN, Solomon MJ, Shaw J. Measuring cancer care coordination: development and validation of a questionnaire for patients. *BMC cancer*. 2011;11:298.
290. Zhang XH, Jin J, Ngorsuraches S, Li SC. Development and validation of a scale to measure patients' trust in pharmacists in Singapore. *Patient preference and adherence*. 2009;3:1-7.
291. Saturno PJ, Martinez-Nicolas I, Robles-Garcia IS, Lopez-Soriano F, Angel-Garcia D. Development and pilot test of a new set of good practice indicators for chronic cancer pain management. *European journal of pain (London, England)*. Jan 2015;19(1):28-38.
292. Hiidenhovi H, Laippala P, Nojonen K. Development of a patient-orientated instrument to measure service quality in outpatient departments. *Journal of advanced nursing*. Jun 2001;34(5):696-705.
293. Haddad S, Potvin L, Roberge D, Pineault R, Remondin M. Patient perception of quality following a visit to a doctor in a primary care unit. *Family practice*. Feb 2000;17(1):21-29.
294. Lukas CV, Meterko M, Lowcock S, et al. Monitoring the progress of system integration. *Quality management in health care*. Winter 2002;10(2):1-11.
295. Masters S, Giles L, Halbert J, Crotty M. Development and testing of a questionnaire to measure older people's experience of the Transition Care Program in Australia. *Australasian journal on ageing*. Dec 2010;29(4):172-178.
296. Shelef K, Diamond GM. Short form of the revised Vanderbilt therapeutic alliance scale: development, reliability, and validity. *Psychotherapy research : journal of the Society for Psychotherapy Research*. Jul 2008;18(4):433-443.
297. Del Piccolo L, Mead N, Gask L, et al. The English version of the Verona medical interview classification system (VR-MICS). An assessment of its reliability and a comparative cross-cultural test of its validity. *Patient education and counseling*. Sep 2005;58(3):252-264.
298. Bachinger SM, Kolk AM, Smets EM. Patients' trust in their physician--psychometric properties of the Dutch version of the "Wake Forest Physician Trust Scale". *Patient education and counseling*. Jul 2009;76(1):126-131.
299. Hall MA, Zheng B, Dugan E, et al. Measuring patients' trust in their primary care providers. *Medical care research and review : MCRR*. Sep 2002;59(3):293-318.
300. Hatcher RL, Gillaspay JA. Development and validation of a revised short version of the Working Alliance Inventory. *Psychotherapy Research*. 2006;16(1):12-25.
