# Supplementary material
Source: PubMed Central journal article supplement (PMC5192798)
Supplement: MILQ-94-862-s005.pdf [file MILQ-94-862-s005.pdf]

## Appendix E

### Overall quality of measurement properties per index instrument

| Criteria used |            |                                                                                                                                                           |
|---------------|------------|-----------------------------------------------------------------------------------------------------------------------------------------------------------|
| Level         | Rating     | Criteria                                                                                                                                                  |
| Strong        | +++ or --- | Consistent findings in <b>multiple studies of good</b> methodological quality <b>OR</b> in <b>one study of excellent</b> methodological quality           |
| Moderate      | ++ or --   | Consistent findings in <b>multiple studies of fair</b> methodological quality <b>OR</b> in <b>one study of good</b> methodological quality                |
| Limited       | + or -     | <b>One study of fair</b> methodological quality                                                                                                           |
| Conflicting   | +/-        | Conflicting <b>findings</b>                                                                                                                               |
| Unknown       | ?          | Only studies of poor methodological quality <b>OR</b> only <b>indeterminate</b> results from <b>multiple studies regardless of methodological quality</b> |
| not assessed  | 0          | not assessed                                                                                                                                              |

|     | Index Instrument (n=209)                                        | Internal Consistency | Reliability | Measurement Error | Content Validity | Structural Validity | Construct Validity | Criterion Validity | Responsiveness |
|-----|-----------------------------------------------------------------|----------------------|-------------|-------------------|------------------|---------------------|--------------------|--------------------|----------------|
| 1.  | 4-point Ordinal Alliance Scale (4PAS)                           | +                    | 0           | 0                 | 0                | +                   | +                  | 0                  | 0              |
| 2.  | Agnew Relationship Measure                                      | --                   | 0           | ?                 | ?                | +                   | ?                  | 0                  | 0              |
| 3.  | Alberta Continuity of Services Scale-Mental Health              | +/-                  | 0           | ?                 | +++              | +/-                 | ++                 | 0                  | 0              |
| 4.  | Ambulatory Care Experiences Survey                              | ?                    | 0           | 0                 | 0                | 0                   | 0                  | 0                  | 0              |
| 5.  | Assertive Community Treatment (TACT) Scale                      | +                    | -           | 0                 | ++               | +                   | +                  | 0                  | 0              |
| 6.  | Assessment of Chronic Illness Care (ACIC)                       | +/-                  | 0           | 0                 | ?                | ?                   | ?                  | 0                  | ?              |
| 7.  | Better Jobs Better Care PCC instrument                          | ?                    | 0           | 0                 | ++               | 0                   | ++                 | 0                  | 0              |
| 8.  | California Psychotherapy Alliance Scales (CALPAS)               | +/-                  | ?           | 0                 | ?                | +/-                 | ++                 | 0                  | 0              |
| 9.  | Cancer services integration                                     | +++                  | 0           | 0                 | ++               | +++                 | ?                  | 0                  | 0              |
| 10. | Care Continuity Instrument                                      | ++                   | ?           | 0                 | ?                | +/-                 | 0                  | 0                  | ?              |
| 11. | Care Process Self Evaluation Tool (CPSET)                       | ++                   | -           | 0                 | +++              | +/-                 | ?                  | ?                  | 0              |
| 12. | Care Transition Measure (CTM)                                   | +/-                  | 0           | ?                 | +/-              | +/-                 | +/-                | ?                  | 0              |
| 13. | Caregivers' Satisfaction with Stroke Care Questionnaire: C-SASC | ++                   | 0           | 0                 | 0                | ?                   | 0                  | 0                  | 0              |
| 14. | CARES observation tool (COT)                                    | ?                    | 0           | 0                 | ?                | 0                   | 0                  | 0                  | 0              |
| 15. | CareWell in Hospital Questionnaire                              | ?                    | +           | 0                 | ?                | 0                   | ?                  | 0                  | ?              |
| 16. | Caring Assessment Tool (CAT)                                    | +++                  | ?           | 0                 | ?                | +++                 | -                  | ?                  | 0              |
| 17. | Case Management Quality Questionnaire (CMQQ)                    | +++                  | 0           | 0                 | ?                | ?                   | 0                  | 0                  | 0              |
| 18. | Client Perception of Coordination Questionnaire (CPCQ)          | ++                   | 0           | 0                 | ++               | ?                   | ++                 | 0                  | 0              |
| 19. | Client-Centred Questionnaire                                    | +++                  | 0           | 0                 | +++              | +++                 | 0                  | 0                  | 0              |
| 20. | Client-Centred Rehabilitation Questionnaire                     | ?                    | +           | 0                 | +                | ?                   | +                  | 0                  | 0              |
| 21. | Clinical Risk Monitoring Instrument                             | 0                    | 0           | 0                 | +++              | 0                   | 0                  | 0                  | 0              |
| 22. | Clinician Support for Patient Activation Measure (CS-PAM)       | ?                    | 0           | 0                 | 0                | ?                   | 0                  | 0                  | 0              |
| 23. | CollaboRATE                                                     | 0                    | --          | 0                 | +++              | ?                   | 0                  | ?                  | ?              |
| 24. | Collaboration And Satisfaction About Care Decisions             | +                    | 0           | 0                 | +++              | ?                   | +                  | 0                  | 0              |
| 25. | Communication Assessment Instrument                             | ++                   | 0           | 0                 | +++              | +/-                 | 0                  | 0                  | 0              |
| 26. | Components of Primary Care Index (CPCI)                         | +/-                  | 0           | ?                 | ?                | +/-                 | +/-                | +                  | 0              |
| 27. | CONNECT                                                         | ?                    | --          | 0                 | +/-              | 0                   | -                  | 0                  | 0              |
| 28. | Consultation and Relational Empathy (CARE) measure              | +/-                  | --          | 0                 | +++              | +/-                 | +/-                | 0                  | 0              |

|     | Index Instrument (n=209)                                                | Internal Consistency | Reliability | Measurement Error | Content Validity | Structural Validity | Construct Validity | Criterion Validity | Responsiveness |
|-----|-------------------------------------------------------------------------|----------------------|-------------|-------------------|------------------|---------------------|--------------------|--------------------|----------------|
| 29. | Consumer Assessment of Behavioral Health Survey (CABHS)                 | +++                  | 0           | 0                 | ?                | ?                   | 0                  | +++                | 0              |
| 30. | Consumer Assessment of Health Plans Survey (CAHPS)                      | +/-                  | +/-         | 0                 | +/-              | +/-                 | ++                 | 0                  | 0              |
| 31. | Consumer Perceptions of Care (CPC)                                      | +++                  | --          | 0                 | +++              | ---                 | 0                  | ?                  | 0              |
| 32. | Consumer Quality Index (CQI)                                            | +/-                  | ---         | 0                 | +/-              | +/-                 | +/-                | 0                  | 0              |
| 33. | Continuity of Care - User Measure (CONTINUUM)                           | ---                  | +           | 0                 | ?                | ?                   | ++                 | 0                  | 0              |
| 34. | Continuity of Care in Children's Mental Health (C3MH)                   | +++                  | ++          | 0                 | ?                | ?                   | +/-                | ?                  | 0              |
| 35. | Continuity of Care Measure (CCM)                                        | ?                    | 0           | 0                 | 0                | ?                   | ?                  | 0                  | ?              |
| 36. | Continuity of Care Practices Survey                                     | ?                    | 0           | 0                 | ?                | 0                   | ++                 | 0                  | 0              |
| 37. | Coordination of Handoff Effectiveness Questionnaire (CHEQ)              | ?                    | 0           | 0                 | +++              | 0                   | 0                  | 0                  | ?              |
| 38. | CPSO Peer Assessment                                                    | +                    | 0           | 0                 | +++              | +                   | ?                  | 0                  | 0              |
| 39. | Cuestionario Continuidad Asistencial Entre Niveles de Atención (CCAENA) | +++                  | 0           | 0                 | ?                | ++                  | ++                 | 0                  | 0              |
| 40. | Cultural competence assessment instrument                               | ++                   | ++          | 0                 | ?                | ++                  | ++                 | 0                  | 0              |
| 41. | DELTA service user assessment                                           | ?                    | 0           | 0                 | +                | ?                   | 0                  | 0                  | 0              |
| 42. | Diabetes Continuity of Care Scale (DCCS)                                | ?                    | +           | 0                 | ?                | ?                   | -                  | 0                  | 0              |
| 43. | Distrust of the healthcare system (DHS)                                 | +++                  | 0           | 0                 | 0                | 0                   | ++                 | 0                  | 0              |
| 44. | Doctor-Patient Scale                                                    | --                   | 0           | 0                 | ?                | ?                   | ?                  | 0                  | 0              |
| 45. | Dual Diagnosis Capability in Healthcare Settings (DDCHCS)               | ?                    | ?           | 0                 | 0                | 0                   | 0                  | 0                  | 0              |
| 46. | Embedded Patient-Centered Care Scale                                    | ?                    | 0           | 0                 | +                | 0                   | -                  | 0                  | 0              |
| 47. | ENDOCARE questionnaire (ECQ)                                            | -                    | 0           | 0                 | +                | +                   | 0                  | 0                  | 0              |
| 48. | EUROPEP                                                                 | +/-                  | 0           | ?                 | ?                | ?                   | ?                  | 0                  | 0              |
| 49. | Experienced continuity of care for diabetes mellitus (ECC-DM)           | +++                  | ++          | ?                 | 0                | ?                   | 0                  | ?                  | 0              |
| 50. | Facilitation of Patient Involvement Scale (FPI)                         | ?                    | ?           | 0                 | ?                | 0                   | ?                  | 0                  | 0              |
| 51. | Family Assessment of Treatment at End of Life                           | ++                   | 0           | 0                 | ?                | ?                   | ++                 | ++                 | 0              |
| 52. | Family perceived involvement (F-INVOLVE)                                | +                    | +           | 0                 | ++               | -                   | +                  | 0                  | 0              |
| 53. | Four Habits Coding Scheme (4HCS)                                        | ?                    | +/-         | 0                 | 0                | ?                   | +                  | 0                  | 0              |
| 54. | General Practice Assessment Questionnaire (GPAQ)                        | +/-                  | +           | 0                 | ?                | +/-                 | +                  | 0                  | 0              |
| 55. | General Practice Assessment Survey (GPAS)                               | +/-                  | ?           | ?                 | ?                | +++                 | +/-                | ?                  | 0              |
| 56. | General practice clinical linkages interviews (GPC-LI)                  | +                    | ?           | ?                 | 0                | +                   | ?                  | 0                  | 0              |
| 57. | General Practice Patient Survey                                         | ?                    | -           | 0                 | ?                | 0                   | 0                  | 0                  | 0              |
| 58. | Geriatric Care Environment Scale (GCES)                                 | ++                   | 0           | 0                 | ?                | +                   | -                  | 0                  | 0              |
| 59. | Giving Youth a Voice questionnaire (GYV)                                | ?                    | +           | 0                 | ?                | 0                   | +                  | 0                  | 0              |
| 60. | Group-Based Medical Mistrust Scale (GBMMS)                              | +                    | 0           | 0                 | 0                | +                   | +                  | 0                  | 0              |
| 61. | Handoff clinical evaluation exercise (CEX)                              | ?                    | ?           | 0                 | +++              | 0                   | 0                  | 0                  | 0              |
| 62. | Handover Performance Tool (HPT)                                         | +                    | +           | 0                 | ?                | +                   | ?                  | 0                  | 0              |
| 63. | Health Care Climate Questionnaire (HCCQ)                                | ?                    | 0           | 0                 | ?                | 0                   | --                 | 0                  | 0              |
| 64. | Health Care Communication Questionnaire (HCCQ)                          | +                    | 0           | ?                 | ?                | ?                   | +                  | 0                  | 0              |
| 65. | Health Care relationship (HCR) Trust Scale                              | +++                  | --          | 0                 | ?                | +++                 | 0                  | 0                  | 0              |
| 66. | Health Care System Distrust Scale                                       | +++                  | 0           | 0                 | +++              | ---                 | ++                 | --                 | 0              |
| 67. | Heart Continuity of Care Questionnaire (HCCQ)                           | +/-                  | 0           | 0                 | ?                | ---                 | ++                 | +                  | 0              |

|      | Index Instrument (n=209)                                     | Internal Consistency | Reliability | Measurement Error | Content Validity | Structural Validity | Construct Validity | Criterion Validity | Responsiveness |
|------|--------------------------------------------------------------|----------------------|-------------|-------------------|------------------|---------------------|--------------------|--------------------|----------------|
| 68.  | Helping Alliance Questionnaire (HAQ)                         | +/-                  | 0           | 0                 | ?                | +/-                 | +/-                | 0                  | 0              |
| 69.  | Hospital Survey of Patient Safety Culture (HSOPSC)           | --                   | 0           | 0                 | 0                | ++                  | 0                  | 0                  | 0              |
| 70.  | Human Service integration Measure                            | 0                    | 0           | 0                 | ?                | ?                   | ?                  | ?                  | 0              |
| 71.  | Hybrid tool from 3 questionnaires                            | ?                    | 0           | 0                 | ?                | +                   | 0                  | 0                  | 0              |
| 72.  | Index of GP integration (GP questionnaire)                   | +++                  | 0           | 0                 | ?                | ?                   | ?                  | 0                  | 0              |
| 73.  | Individualized Care Instrument (ICI)                         | ?                    | 0           | 0                 | 0                | ?                   | ?                  | 0                  | 0              |
| 74.  | Individualized Care Inventory                                | +/-                  | 0           | 0                 | 0                | ?                   | 0                  | 0                  | 0              |
| 75.  | Individualized Care Scale (ICS)                              | ++                   | -           | 0                 | ?                | +/-                 | +/-                | 0                  | 0              |
| 76.  | Inpatient-Treatment Alliance Scale (ITAS)                    | +                    | -           | 0                 | ?                | +                   | 0                  | 0                  | 0              |
| 77.  | Internal Participation Scale (IPS)                           | ?                    | 0           | 0                 | 0                | ?                   | ?                  | 0                  | 0              |
| 78.  | Interpersonal Processes of Care version (IPC-II)             | +/-                  | 0           | ?                 | ?                | ?                   | ?                  | 0                  | 0              |
| 79.  | Jefferson Scale of Physician Empathy                         | ++                   | 0           | 0                 | ?                | ++                  | --                 | --                 | 0              |
| 80.  | Jones Synergy Scale                                          | +                    | 0           | 0                 | ?                | +                   | 0                  | +                  | 0              |
| 81.  | Kim Alliance Scale                                           | ++                   | 0           | 0                 | ?                | ?                   | ++                 | 0                  | 0              |
| 82.  | Learners' Perceptions Survey—Primary Care (LPS-PC)           | 0                    | 0           | 0                 | ?                | ?                   | 0                  | 0                  | 0              |
| 83.  | Matched-pair instrument                                      | ++                   | 0           | ?                 | +++              | ++                  | 0                  | 0                  | 0              |
| 84.  | Measure of Experienced Continuity of Care (MECC)             | ?                    | +           | 0                 | ?                | 0                   | ?                  | 0                  | 0              |
| 85.  | Measure of Patient-Centered Communication (MPCC)             | 0                    | -           | 0                 | 0                | ?                   | 0                  | 0                  | 0              |
| 86.  | Measure of Processes of Care (MPOC)                          | +/-                  | +/-         | 0                 | +/-              | +/-                 | +/-                | +/-                | 0              |
| 87.  | Measure of Trust in Insurers                                 | ++                   | 0           | 0                 | ?                | ?                   | ++                 | 0                  | 0              |
| 88.  | Measuring instrument for individualized care                 | ?                    | +           | 0                 | ?                | ?                   | ++                 | 0                  | 0              |
| 89.  | Medical Care Questionnaire (MCQ)                             | +++                  | 0           | 0                 | +++              | ---                 | ++                 | 0                  | 0              |
| 90.  | Medical Communication Competence Scale                       | ++                   | 0           | 0                 | ?                | ?                   | 0                  | 0                  | 0              |
| 91.  | Medical Home Index (MHI)                                     | ?                    | +           | 0                 | +++              | ?                   | ?                  | 0                  | 0              |
| 92.  | Mental Health Statistics Improvement Program (MHSIP)         | +++                  | 0           | 0                 | ?                | ?                   | 0                  | +++                | 0              |
| 93.  | Multicountry Survey Study Responsiveness Questionnaire       | ---                  | --          | 0                 | +++              | +++                 | ++                 | 0                  | 0              |
| 94.  | Multidimensional Trust in Health Care Systems Scale (MTHCSS) | +                    | 0           | 0                 | ?                | +                   | -                  | 0                  | 0              |
| 95.  | National health and health services use questionnaire        | ?                    | 0           | ?                 | 0                | 0                   | ?                  | ?                  | 0              |
| 96.  | Nijmegen Continuity Questionnaire (NCQ)                      | +++                  | ++          | 0                 | ++               | +++                 | +/-                | 0                  | 0              |
| 97.  | Nursing Practice Models Questionnaire                        | -                    | 0           | 0                 | ?                | +                   | 0                  | 0                  | 0              |
| 98.  | Observing patient involvement scale (OPTION)                 | ++                   | -           | 0                 | ?                | --                  | ++                 | 0                  | 0              |
| 99.  | Oncology Patients' Perception of the Quality of Nursing Care | +                    | 0           | 0                 | ?                | +                   | 0                  | 0                  | 0              |
| 100. | Outcomes index (measure of person-centered planning)         | ?                    | ?           | 0                 | ?                | ?                   | 0                  | 0                  | 0              |
| 101. | OutPatient Experiences Questionnaire (OPEQ)                  | +++                  | ++          | 0                 | ?                | ?                   | +++                | 0                  | 0              |
| 102. | Pain Care Quality (PainCQ)                                   | ++                   | 0           | ?                 | +/-              | --                  | --                 | 0                  | 0              |
| 103. | Parent's Perceptions of Primary Care measure (P3C)           | ++                   | 0           | 0                 | +++              | ++                  | ?                  | 0                  | 0              |
| 104. | Parents' Perceptions of Continuity Scale (PPCS)              | ?                    | 0           | 0                 | ?                | 0                   | --                 | 0                  | 0              |
| 105. | Patient Activation Measure (PAM)                             | +/-                  | ?           | ?                 | ?                | ?                   | +++                | ++                 | 0              |
| 106. | Patient Acuity Case management Evaluation (PACE tool)        | 0                    | ?           | 0                 | +++              | ?                   | ?                  | 0                  | 0              |
| 107. | Patient Assessment of Chronic Illness Care (PACIC)           | +/-                  | +/-         | ?                 | +/-              | +/-                 | +++                | 0                  | ?              |

|      | Index Instrument (n=209)                                                                                                                                        | Internal Consistency | Reliability | Measurement Error | Content Validity | Structural Validity | Construct Validity | Criterion Validity | Responsiveness |
|------|-----------------------------------------------------------------------------------------------------------------------------------------------------------------|----------------------|-------------|-------------------|------------------|---------------------|--------------------|--------------------|----------------|
| 108. | Patient Career Diary                                                                                                                                            | --                   | 0           | ?                 | +++              | ?                   | 0                  | 0                  | 0              |
| 109. | Patient Continuity of Care Questionnaire (PCCQ)                                                                                                                 | ++                   | 0           | 0                 | 0                | ++                  | ++                 | 0                  | 0              |
| 110. | Patient Experiences Questionnaire (PEQ)                                                                                                                         | +/-                  | --          | 0                 | +++              | +++                 | +/-                | 0                  | 0              |
| 111. | Patient Perception of Patient-Centeredness Questionnaire (PPPCQ)                                                                                                | ?                    | ?           | 0                 | 0                | +                   | -                  | -                  | ?              |
| 112. | Patient Perceptions of Integrated Care Survey                                                                                                                   | -                    | 0           | 0                 | +                | ?                   | +                  | 0                  | 0              |
| 113. | Patient Reactions Assessment                                                                                                                                    | ++                   | 0           | 0                 | ?                | ?                   | ++                 | 0                  | 0              |
| 114. | Patient Responses to Nursing Behaviours (PRNB)                                                                                                                  | ++                   | 0           | 0                 | +++              | -                   | ?                  | 0                  | 0              |
| 115. | Patient trust in community pharmacists (TRUST-Ph)                                                                                                               | +++                  | 0           | 0                 | +++              | ----                | ++                 | 0                  | 0              |
| 116. | Patient-centered family-focused care (PCFFC)                                                                                                                    | +++                  | 0           | ?                 | ?                | +/-                 | 0                  | 0                  | 0              |
| 117. | Patient-Centered Medical Home tool (PCMH)                                                                                                                       | 0                    | 0           | 0                 | 0                | ?                   | 0                  | 0                  | ?              |
| 118. | Patient-Centered Observation Form (PCOF)                                                                                                                        | ?                    | 0           | 0                 | 0                | 0                   | 0                  | 0                  | 0              |
| 119. | Patient-centered questionnaire (PCQ)                                                                                                                            | +/-                  | ?           | 0                 | +++              | +/-                 | +/-                | 0                  | 0              |
| 120. | Patient-centered score sheet                                                                                                                                    | 0                    | ?           | 0                 | 0                | 0                   | 0                  | --                 | ?              |
| 121. | Patient-centred care competency (PCC)                                                                                                                           | +++                  | ?           | 0                 | ?                | ----                | 0                  | 0                  | 0              |
| 122. | Patient-centred instrument for assessment of quality of breast cancer care                                                                                      | +                    | 0           | 0                 | +                | +                   | 0                  | 0                  | 0              |
| 123. | Patient-Centredness Multi-Choice Questionnaire x (PMQX)                                                                                                         | 0                    | +           | 0                 | 0                | 0                   | ?                  | 0                  | 0              |
| 124. | Patient-Doctor Depth of Relationship Scale                                                                                                                      | ?                    | +           | 0                 | ++               | +                   | +                  | 0                  | 0              |
| 125. | Patient-Doctor Relationship Questionnaire                                                                                                                       | +/-                  | --          | 0                 | ?                | ++                  | 0                  | ?                  | 0              |
| 126. | Patient-relevant hierarchy of needs                                                                                                                             | ?                    | 0           | 0                 | ?                | +                   | 0                  | 0                  | 0              |
| 127. | Patient-reported Interpersonal Processes of Care                                                                                                                | +++                  | 0           | 0                 | ++               | ?                   | ++                 | 0                  | 0              |
| 128. | Patient's Perception of Continuity (PC)                                                                                                                         | +                    | 0           | 0                 | ?                | -                   | 0                  | ?                  | 0              |
| 129. | Pediatric Patient-Family-Centered Care Benchmarking Survey                                                                                                      | +                    | 0           | 0                 | +++              | +                   | 0                  | 0                  | 0              |
| 130. | Pediatric Trust in Physician Scale (Pedi-TiPS)                                                                                                                  | ?                    | 0           | 0                 | 0                | 0                   | ++                 | 0                  | 0              |
| 131. | Perceived Involvement in Care Scale                                                                                                                             | +                    | 0           | 0                 | 0                | +                   | +                  | 0                  | 0              |
| 132. | Perceptions of Involvement in Care Scale                                                                                                                        | -                    | 0           | 0                 | 0                | ?                   | -                  | 0                  | 0              |
| 133. | Person-centered Care Assessment Tool (P-CAT)                                                                                                                    | +++                  | +++         | 0                 | +/-              | +/-                 | +                  | 0                  | 0              |
| 134. | Person-centered care of Older People with Cognitive Impairment in Acute Care (POPAC)                                                                            | ++                   | -           | 0                 | ?                | ++                  | 0                  | 0                  | 0              |
| 135. | Person-centred Climate Questionnaire (PCCQ)                                                                                                                     | +++                  | +/-         | 0                 | +/-              | +++                 | 0                  | 0                  | 0              |
| 136. | Person-Centred Health Care for Older Adults Survey                                                                                                              | +++                  | 0           | 0                 | ?                | +++                 | 0                  | 0                  | 0              |
| 137. | Person-directed Care (PDC)                                                                                                                                      | ++                   | 0           | 0                 | +++              | ++                  | ++                 | 0                  | 0              |
| 138. | Pharmacy Service Orientation Measure                                                                                                                            | ?                    | 0           | 0                 | 0                | 0                   | 0                  | 0                  | 0              |
| 139. | Picker Commonwealth Patient Centered Care Questionnaire                                                                                                         | 0                    | ?           | 0                 | +                | 0                   | 0                  | 0                  | 0              |
| 140. | Postoperative Handover Assessment Tool (PoHAT)                                                                                                                  | 0                    | +           | 0                 | +                | 0                   | ?                  | 0                  | 0              |
| 141. | Prescriptions, Ready to reenter the community, Placement, Assurance of Safety, Realistic Expectations, Empowerment, Directed to appropriate services (PREPARED) | 0                    | 0           | 0                 | ?                | ++                  | ++                 | --                 | 0              |
| 142. | Primary Care Assessment Survey (PCAS)                                                                                                                           | +/-                  | -           | ?                 | ?                | +/-                 | +/-                | 0                  | 0              |
| 143. | Primary Care Assessment Tool (PCAT)                                                                                                                             | +/-                  | +/-         | ?                 | ?                | +/-                 | +/-                | +++                | 0              |
| 144. | Primary Care Behavioral Health Provider Adherence Questionnaire (PPAQ)                                                                                          | ?                    | 0           | 0                 | ?                | ?                   | +                  | +                  | 0              |

|      | Index Instrument (n=209)                                                         | Internal Consistency | Reliability | Measurement Error | Content Validity | Structural Validity | Construct Validity | Criterion Validity | Responsiveness |
|------|----------------------------------------------------------------------------------|----------------------|-------------|-------------------|------------------|---------------------|--------------------|--------------------|----------------|
| 145. | Processes Index (measure of person-centered planning)                            | ?                    | ?           | 0                 | ?                | ?                   | 0                  | 0                  | 0              |
| 146. | Prostate Care Questionnaire for Patients (PCQ-P)                                 | --                   | --          | 0                 | +++              | ?                   | --                 | 0                  | 0              |
| 147. | Quality Care Questionnaire–End of Life (QCQ–EOL)                                 | ++                   | 0           | 0                 | ?                | ++                  | 0                  | 0                  | 0              |
| 148. | Quality from Patient's Perspective                                               | ?                    | 0           | 0                 | ?                | +++                 | 0                  | 0                  | 0              |
| 149. | Quality of Care Through the Patients' Eyes (QUOTE)                               | +++                  | +/-         | 0                 | +/-              | +/-                 | +++                | ++                 | 0              |
| 150. | Quality of Dying and Death (QODD)                                                | +++                  | 0           | 0                 | 0                | ---                 | ?                  | 0                  | 0              |
| 151. | Quality of End-of-life care and Satisfaction with Treatment (QUEST)              | ?                    | -           | 0                 | ++               | 0                   | +                  | 0                  | 0              |
| 152. | Quality of end-of-life communication (QOC)                                       | +++                  | 0           | 0                 | +++              | +++                 | ++                 | 0                  | 0              |
| 153. | Quality of Family Experience (QUAL-E FAM)                                        | -                    | -           | 0                 | +++              | ?                   | ?                  | 0                  | 0              |
| 154. | Quality of Psychiatric Care                                                      | ++                   | 0           | 0                 | 0                | ++                  | ++                 | 0                  | 0              |
| 155. | Race-based Medical Mistrust                                                      | ++                   | 0           | 0                 | 0                | ?                   | ?                  | 0                  | 0              |
| 156. | Relational and management continuity of care Questionnaire                       | +                    | 0           | 0                 | ?                | ?                   | 0                  | 0                  | 0              |
| 157. | Relational Communication Scale                                                   | ?                    | -           | 0                 | 0                | +/-                 | ?                  | 0                  | 0              |
| 158. | Revised Health Care System Distrust Scale                                        | +                    | 0           | 0                 | +++              | ?                   | -                  | 0                  | 0              |
| 159. | Rochester Participatory Decision-Making Scale (RPAD)                             | 0                    | ++          | 0                 | 0                | 0                   | --                 | 0                  | 0              |
| 160. | Safety Net Medical Home Scale (SNMHS)                                            | ?                    | 0           | 0                 | ?                | ?                   | 0                  | 0                  | 0              |
| 161. | Scale of Functional Integration                                                  | ?                    | 0           | 0                 | ?                | ?                   | ?                  | 0                  | 0              |
| 162. | Scale To Assess Therapeutic Relationships in Community Mental Health Care (STAR) | 0                    | 0           | 0                 | 0                | ++                  | --                 | 0                  | 0              |
| 163. | Service Quality Questionnaire                                                    | +                    | 0           | 0                 | +++              | ?                   | 0                  | 0                  | 0              |
| 164. | SERVQUAL                                                                         | +/-                  | ?           | ?                 | ?                | +/-                 | ++                 | 0                  | 0              |
| 165. | Survivor Unmet Needs Survey (SUNS)                                               | +++                  | +/-         | 0                 | +++              | +/-                 | +/-                | +++                | 0              |
| 166. | Systematic Culture Inquiry On Patient safety in primary care (SCOPE)             | ---                  | 0           | 0                 | +++              | +++                 | --                 | 0                  | 0              |
| 167. | Systematic Monitoring of Male Circumcision Scale-Up                              | 0                    | 0           | 0                 | 0                | --                  | 0                  | 0                  | 0              |
| 168. | Team Emergency Assessment Measure (TEAM)                                         | +                    | -           | 0                 | ?                | +                   | 0                  | 0                  | 0              |
| 169. | Team Evaluation and Assessment Measure (TEAM)                                    | ?                    | 0           | 0                 | ++               | 0                   | -                  | 0                  | 0              |
| 170. | The Human Connection Scale                                                       | +                    | 0           | 0                 | 0                | ?                   | -                  | 0                  | 0              |
| 171. | Therapy Alliance Scale                                                           | +/-                  | 0           | 0                 | 0                | ?                   | +++                | 0                  | 0              |
| 172. | Trust in Nurses Scale                                                            | +/-                  | 0           | 0                 | ++               | --                  | +                  | 0                  | 0              |
| 173. | Trust in Oncologist Scale (TiOS)                                                 | +++                  | ++          | 0                 | +++              | +++                 | 0                  | 0                  | 0              |
| 174. | Trust in Physicians Scale                                                        | +/-                  | +           | 0                 | ?                | +/-                 | +/-                | 0                  | 0              |
| 175. | Trust in the Medical Profession                                                  | +++                  | 0           | 0                 | +++              | +++                 | ++                 | 0                  | 0              |
| 176. | Tucker Culturally Sensitive Healthcare Inventory (T-CSHCI)                       | +/-                  | ++          | 0                 | +                | ?                   | ?                  | 0                  | 0              |
| 177. | Unnamed 1                                                                        | 0                    | 0           | 0                 | ?                | ?                   | ?                  | 0                  | 0              |
| 178. | Unnamed 12                                                                       | ?                    | +           | 0                 | ++               | 0                   | 0                  | 0                  | 0              |
| 179. | Unnamed 14                                                                       | +                    | 0           | 0                 | ?                | +                   | 0                  | 0                  | 0              |
| 180. | Unnamed 15                                                                       | ?                    | 0           | 0                 | +                | 0                   | 0                  | 0                  | ?              |
| 181. | Unnamed 16                                                                       | 0                    | 0           | 0                 | 0                | ?                   | ?                  | 0                  | 0              |
| 182. | Unnamed 17                                                                       | ?                    | +           | 0                 | ?                | ?                   | 0                  | ?                  | 0              |
| 183. | Unnamed 18                                                                       | ?                    | 0           | 0                 | 0                | 0                   | +                  | 0                  | 0              |

|      | Index Instrument (n=209)                                 | Internal Consistency | Reliability | Measurement Error | Content Validity | Structural Validity | Construct Validity | Criterion Validity | Responsiveness |
|------|----------------------------------------------------------|----------------------|-------------|-------------------|------------------|---------------------|--------------------|--------------------|----------------|
| 184. | Unnamed 19                                               | ?                    | 0           | 0                 | 0                | 0                   | +                  | 0                  | 0              |
| 185. | Unnamed 20                                               | +                    | 0           | 0                 | 0                | -                   | -                  | 0                  | 0              |
| 186. | Unnamed 21                                               | +                    | -           | 0                 | ?                | ?                   | ?                  | 0                  | 0              |
| 187. | Unnamed 22                                               | +                    | 0           | 0                 | +++              | +                   | +                  | 0                  | 0              |
| 188. | Unnamed 23                                               | +++                  | 0           | 0                 | +                | ++                  | ++                 | 0                  | 0              |
| 189. | Unnamed 24                                               | ?                    | 0           | 0                 | 0                | ?                   | 0                  | 0                  | 0              |
| 190. | Unnamed 25                                               | 0                    | 0           | 0                 | ?                | 0                   | 0                  | 0                  | 0              |
| 191. | Unnamed 27                                               | -                    | 0           | 0                 | ?                | -                   | 0                  | 0                  | 0              |
| 192. | Unnamed 29                                               | ++                   | ++          | 0                 | ?                | ++                  | 0                  | 0                  | 0              |
| 193. | Unnamed 31                                               | +                    | ?           | 0                 | ?                | ?                   | +                  | +                  | 0              |
| 194. | Unnamed 32                                               | ?                    | 0           | 0                 | +++              | 0                   | ?                  | 0                  | 0              |
| 195. | Unnamed 33                                               | +                    | 0           | 0                 | ?                | +                   | -                  | 0                  | 0              |
| 196. | Unnamed 34                                               | +                    | -           | 0                 | +++              | +                   | +                  | 0                  | 0              |
| 197. | Unnamed 35                                               | ++                   | 0           | 0                 | +++              | --                  | 0                  | 0                  | 0              |
| 198. | Unnamed 36                                               | ++                   | --          | 0                 | ?                | ++                  | 0                  | 0                  | 0              |
| 199. | Unnamed 37                                               | ++                   | 0           | 0                 | ?                | ++                  | --                 | 0                  | 0              |
| 200. | Unnamed 39                                               | 0                    | +           | 0                 | 0                | 0                   | 0                  | 0                  | 0              |
| 201. | Unnamed 4                                                | ?                    | ?           | 0                 | ?                | ?                   | 0                  | 0                  | 0              |
| 202. | Unnamed 40                                               | ++                   | 0           | 0                 | ?                | ++                  | ++                 | ++                 | 0              |
| 203. | Unnamed 7                                                | +                    | 0           | 0                 | +                | ?                   | 0                  | ?                  | 0              |
| 204. | Unnamed 8                                                | -                    | +           | 0                 | 0                | +                   | +                  | -                  | 0              |
| 205. | Vanderbilt Therapeutic Alliance Scale (VTAS-R)           | ++                   | ++          | 0                 | 0                | 0                   | ?                  | ?                  | 0              |
| 206. | Verona medical interview classification system (VR-MICS) | 0                    | ++          | 0                 | 0                | ?                   | 0                  | 0                  | 0              |
| 207. | Veterans Affairs Outpatient Community Services           | +/-                  | 0           | 0                 | 0                | +/-                 | 0                  | 0                  | 0              |
| 208. | Wake Forest Physician Trust Scale                        | +++                  | ++          | 0                 | +/-              | +/-                 | ++                 | 0                  | 0              |
| 209. | Working Alliance Inventory (WAI)                         | +/-                  | ?           | 0                 | ?                | +/-                 | +/-                | 0                  | 0              |
