# Supplementary material
Source: PubMed Central journal article supplement (PMC5192798)
Supplement: MILQ-94-862-s006.pdf [file MILQ-94-862-s006.pdf]

**APPENDIX F**

**Instruments with evidence of adequate measurement properties**

| Level    | Rating     | Criteria                                                                                                                                        |
|----------|------------|-------------------------------------------------------------------------------------------------------------------------------------------------|
| Strong   | +++ or --- | Consistent findings in <b>multiple studies of good</b> methodological quality <b>OR</b> in <b>one study of excellent</b> methodological quality |
| Moderate | ++ or --   | Consistent findings in <b>multiple studies of fair</b> methodological quality <b>OR</b> in <b>one study of good</b> methodological quality      |
| Limited  | + or -     | <b>One study of fair</b> methodological quality                                                                                                 |

| Strong Evidence of Positive Findings (+++)                                                                                                                                                                                                                                                                                                                                                                                                                                                                                                                                                                                                                                                                                                                                                                                                                                                                                                                                                                                                                                                                                                                                                                                                                                                                                                                                                    | Moderate Evidence of Positive Findings (++)                                                                                                                                                                                                                                                                                                                                                                                                                                                                                                                                                                                                                                                                                                                                                                                                                                                                                                                                                                                                                                                                                                                         | Limited Evidence of Positive Findings (+)                                                                                                                                                                                                                                                                                                                                                                                                                                                                                                                                                                                                                                                                                                                                                                                                                                                                                                                                                                                                                                                                                                                             |
|-----------------------------------------------------------------------------------------------------------------------------------------------------------------------------------------------------------------------------------------------------------------------------------------------------------------------------------------------------------------------------------------------------------------------------------------------------------------------------------------------------------------------------------------------------------------------------------------------------------------------------------------------------------------------------------------------------------------------------------------------------------------------------------------------------------------------------------------------------------------------------------------------------------------------------------------------------------------------------------------------------------------------------------------------------------------------------------------------------------------------------------------------------------------------------------------------------------------------------------------------------------------------------------------------------------------------------------------------------------------------------------------------|---------------------------------------------------------------------------------------------------------------------------------------------------------------------------------------------------------------------------------------------------------------------------------------------------------------------------------------------------------------------------------------------------------------------------------------------------------------------------------------------------------------------------------------------------------------------------------------------------------------------------------------------------------------------------------------------------------------------------------------------------------------------------------------------------------------------------------------------------------------------------------------------------------------------------------------------------------------------------------------------------------------------------------------------------------------------------------------------------------------------------------------------------------------------|-----------------------------------------------------------------------------------------------------------------------------------------------------------------------------------------------------------------------------------------------------------------------------------------------------------------------------------------------------------------------------------------------------------------------------------------------------------------------------------------------------------------------------------------------------------------------------------------------------------------------------------------------------------------------------------------------------------------------------------------------------------------------------------------------------------------------------------------------------------------------------------------------------------------------------------------------------------------------------------------------------------------------------------------------------------------------------------------------------------------------------------------------------------------------|
| <b>INTERNAL CONSISTENCY</b>                                                                                                                                                                                                                                                                                                                                                                                                                                                                                                                                                                                                                                                                                                                                                                                                                                                                                                                                                                                                                                                                                                                                                                                                                                                                                                                                                                   |                                                                                                                                                                                                                                                                                                                                                                                                                                                                                                                                                                                                                                                                                                                                                                                                                                                                                                                                                                                                                                                                                                                                                                     |                                                                                                                                                                                                                                                                                                                                                                                                                                                                                                                                                                                                                                                                                                                                                                                                                                                                                                                                                                                                                                                                                                                                                                       |
| Cancer services integration<br>Caring Assessment Tool (CAT)<br>Case Management Quality Questionnaire (CMQQ)<br>Client-Centred Questionnaire<br>Consumer Assessment of Behavioral Health Survey (CABHS)<br>Consumer Perceptions of Care (CPC)<br>Continuity of Care in Children’s Mental Health (C3MH)<br>Cuestionario Continuidad Asistencial Entre Niveles de Atención (CCAENA)<br>Distrust of the healthcare system (DHS)<br>Experienced continuity of care for diabetes mellitus (ECC-DM)<br>Health Care relationship (HCR) Trust Scale<br>Health Care System Distrust Scale<br>Index of GP integration (GP questionnaire)<br>Medical Care Questionnaire (MCQ)<br>Mental Health Statistics Improvement Program (MHSIP)<br>Nijmegen Continuity Questionnaire (NCQ)<br>OutPatient Experiences Questionnaire (OPEQ)<br>Patient trust in community pharmacists (TRUST-Ph)<br>Patient-centered family-focused care (PCFFC)<br>Patient-centred care competency (PCC)<br>Patient-reported Interpersonal Processes of Care<br>Person-centered Care Assessment Tool (P-CAT)<br>Person-centred Climate Questionnaire (PCCQ)<br>Person-Centred Health Care for Older Adults Survey<br>Quality of Care Through the Patients' Eyes (QUOTE)<br>Quality of Dying and Death (QODD)<br>Quality of end-of-life communication (QOC)<br>Survivor Unmet Needs Survey (SUNS)<br>Trust in Oncologist Scale (TiOS) | Care Continuity Instrument<br>Care Process Self Evaluation Tool (CPSET)<br>Caregivers’ Satisfaction with Stroke Care Questionnaire: C-SASC<br>Client Perception of Coordination Questionnaire (CPCQ)<br>Communication Assessment Instrument<br>Cultural competence assessment instrument<br>Family Assessment of Treatment at End of Life<br>Geriatric Care Environment Scale (GCES)<br>Individualized Care Scale (ICS)<br>Jefferson Scale of Physician Empathy<br>Kim Alliance Scale<br>Matched-pair instrument<br>Measure of Trust in Insurers<br>Medical Communication Competence Scale<br>Observing patient involvement scale (OPTION)<br>Pain Care Quality (PainCQ)<br>Parent’s Perceptions of Primary Care measure (P3C)<br>Patient Continuity of Care Questionnaire (PCCQ)<br>Patient Reactions Assessment<br>Patient Responses to Nursing Behaviours (PRNB)<br>Person-centered care of Older People with Cognitive Impairment in Acute Care (POPAC)<br>Person-directed Care (PDC)<br>Quality Care Questionnaire–End of Life (QCQ–EOL)<br>Quality of Psychiatric Care<br>Race-based Medical Mistrust<br>Unnamed 29<br>Unnamed 35<br>Unnamed 36<br>Unnamed 37 | 4-point Ordinal Alliance Scale (4PAS)<br>Assertive Community Treatment (TACT) Scale<br>Collaboration And Satisfaction About Care Decisions<br>CPSO Peer Assessment<br>Family perceived involvement (F-INVOLVE)<br>General practice clinical linkages interviews (GPC-LI)<br>Group-Based Medical Mistrust Scale (GBMMS)<br>Handover Performance Tool (HPT)<br>Health Care Communication Questionnaire (HCCQ)<br>Inpatient-Treatment Alliance Scale (ITAS)<br>Jones Synergy Scale<br>Multidimensional Trust in Health Care Systems Scale (MTHCSS)<br>Oncology Patients' Perception of the Quality of Nursing Care<br>Patient-centred instrument for assessment of quality of breast cancer care<br>Patient's Perception of Continuity (PC)<br>Pediatric Patient-Family–Centered Care Benchmarking Survey<br>Perceived Involvement in Care Scale<br>Relational and management continuity of care Questionnaire<br>Revised Health Care System Distrust Scale<br>Service Quality Questionnaire<br>Team Emergency Assessment Measure (TEAM)<br>The Human Connection Scale<br>Unnamed 14<br>Unnamed 20<br>Unnamed 21<br>Unnamed 22<br>Unnamed 31<br>Unnamed 33<br>Unnamed 34 |

| Strong Evidence of Positive Findings (+++)                                                                                                                                                                                                                                                                                                                                                                                                                                                                                                                                                                                      | Moderate Evidence of Positive Findings (++)                                                                                                                                                                                                                                                                                                                                                                                                                                                                                                                                                                                              | Limited Evidence of Positive Findings (+)                                                                                                                                                                                                                                                                                                                                                                                                                                                                                                                                                                                                                                                                                                    |
|---------------------------------------------------------------------------------------------------------------------------------------------------------------------------------------------------------------------------------------------------------------------------------------------------------------------------------------------------------------------------------------------------------------------------------------------------------------------------------------------------------------------------------------------------------------------------------------------------------------------------------|------------------------------------------------------------------------------------------------------------------------------------------------------------------------------------------------------------------------------------------------------------------------------------------------------------------------------------------------------------------------------------------------------------------------------------------------------------------------------------------------------------------------------------------------------------------------------------------------------------------------------------------|----------------------------------------------------------------------------------------------------------------------------------------------------------------------------------------------------------------------------------------------------------------------------------------------------------------------------------------------------------------------------------------------------------------------------------------------------------------------------------------------------------------------------------------------------------------------------------------------------------------------------------------------------------------------------------------------------------------------------------------------|
| Trust in the Medical Profession<br>Unnamed 23<br>Wake Forest Physician Trust Scale                                                                                                                                                                                                                                                                                                                                                                                                                                                                                                                                              | Unnamed 40<br>Vanderbilt Therapeutic Alliance Scale (VTAS-R)                                                                                                                                                                                                                                                                                                                                                                                                                                                                                                                                                                             | Unnamed 7                                                                                                                                                                                                                                                                                                                                                                                                                                                                                                                                                                                                                                                                                                                                    |
| <b>RELIABILITY</b>                                                                                                                                                                                                                                                                                                                                                                                                                                                                                                                                                                                                              |                                                                                                                                                                                                                                                                                                                                                                                                                                                                                                                                                                                                                                          |                                                                                                                                                                                                                                                                                                                                                                                                                                                                                                                                                                                                                                                                                                                                              |
|                                                                                                                                                                                                                                                                                                                                                                                                                                                                                                                                                                                                                                 | Person-centered Care Assessment Tool (P-CAT)<br>Continuity of Care in Children’s Mental Health (C3MH)<br>Cultural competence assessment instrument<br>Experienced continuity of care for diabetes mellitus (ECC-DM)<br>Nijmegen Continuity Questionnaire (NCQ)<br>OutPatient Experiences Questionnaire (OPEQ)<br>Rochester Participatory Decision-Making Scale (RPAD)<br>Trust in Oncologist Scale (TiOS)<br>Tucker Culturally Sensitive Healthcare Inventory (T-CSHCI)<br>Unnamed 29<br>Vanderbilt Therapeutic Alliance Scale (VTAS-R)<br>Verona medical interview classification system (VR-MICS)<br>Wake Forest Physician Trust Scale | CareWell in Hospital Questionnaire<br>Client-Centred Rehabilitation Questionnaire<br>Continuity of Care - User Measure (CONTINUUM)<br>Diabetes Continuity of Care Scale (DCCS)<br>Family perceived involvement (F-INVOLVE)<br>General Practice Assessment Questionnaire (GPAQ)<br>Giving Youth a Voice questionnaire (GYV)<br>Handover Performance Tool (HPT)<br>Measure of Experienced Continuity of Care (MECC)<br>Measuring instrument for individualized care<br>Medical Home Index (MHI)<br>Patient-Centredness Multi-Choice Questionnaire x (PMQX)<br>Patient-Doctor Depth of Relationship Scale<br>Postoperative Handover Assessment Tool (PoHAT)<br>Trust in Physicians Scale<br>Unnamed 12<br>Unnamed 17<br>Unnamed 39<br>Unnamed 8 |
| <b>MEASUREMENT ERROR</b>                                                                                                                                                                                                                                                                                                                                                                                                                                                                                                                                                                                                        |                                                                                                                                                                                                                                                                                                                                                                                                                                                                                                                                                                                                                                          |                                                                                                                                                                                                                                                                                                                                                                                                                                                                                                                                                                                                                                                                                                                                              |
| None                                                                                                                                                                                                                                                                                                                                                                                                                                                                                                                                                                                                                            | None                                                                                                                                                                                                                                                                                                                                                                                                                                                                                                                                                                                                                                     | None                                                                                                                                                                                                                                                                                                                                                                                                                                                                                                                                                                                                                                                                                                                                         |
| <b>CONTENT VALIDITY</b>                                                                                                                                                                                                                                                                                                                                                                                                                                                                                                                                                                                                         |                                                                                                                                                                                                                                                                                                                                                                                                                                                                                                                                                                                                                                          |                                                                                                                                                                                                                                                                                                                                                                                                                                                                                                                                                                                                                                                                                                                                              |
| Alberta Continuity of Services Scale-Mental Health<br>Care Process Self Evaluation Tool (CPSET)<br>Client-Centred Questionnaire<br>Clinical Risk Monitoring Instrument<br>CollaboRATE<br><br>Collaboration And Satisfaction About Care Decisions<br><br>Communication Assessment Instrument<br>Consultation and Relational Empathy (CARE) measure<br>Consumer Perceptions of Care (CPC)<br>Coordination of Handoff Effectiveness Questionnaire (CHEQ)<br>CPSO Peer Assessment<br>Handoff clinical evaluation exercise (CEX)<br>Health Care System Distrust Scale<br>Matched-pair instrument<br>Medical Care Questionnaire (MCQ) | Assertive Community Treatment (TACT) Scale<br>Better Jobs Better Care PCC instrument<br>Cancer services integration<br>Client Perception of Coordination Questionnaire (CPCQ)<br>Family perceived involvement (F-INVOLVE)<br><br>Nijmegen Continuity Questionnaire (NCQ)<br><br>Patient-Doctor Depth of Relationship Scale<br>Patient-reported Interpersonal Processes of Care<br>Quality of End-of-life care and Satisfaction with Treatment (QUEST)<br>Team Evaluation and Assessment Measure (TEAM)<br>Trust in Nurses Scale<br>Unnamed 12                                                                                            | Client-Centred Rehabilitation Questionnaire<br>DELTA service user assessment<br>Embedded Patient-Centered Care Scale<br>ENDOCARE questionnaire (ECQ)<br>Patient Perceptions of Integrated Care Survey<br>Patient-centred instrument for assessment of quality of breast cancer care<br>Picker Commonwealth Patient Centered Care Questionnaire<br>Postoperative Handover Assessment Tool (PoHAT)<br>Tucker Culturally Sensitive Healthcare Inventory (T-CSHCI)<br>Unnamed 15<br>Unnamed 23<br>Unnamed 7                                                                                                                                                                                                                                      |

| Strong Evidence of Positive Findings (+++)                                                                                                                                                                                                                                                                                                                                                                                                                                                                                                                                                                                                                                                                                                                                                                                                                                                                                                                                                                                                     | Moderate Evidence of Positive Findings (++)                                                                                                                                                                                                                                                                                                                                                                                                                                                                                                                                                                                                                                                                                                                                                                    | Limited Evidence of Positive Findings (+)                                                                                                                                                                                                                                                                                                                                                                                                                                                                                                                               |
|------------------------------------------------------------------------------------------------------------------------------------------------------------------------------------------------------------------------------------------------------------------------------------------------------------------------------------------------------------------------------------------------------------------------------------------------------------------------------------------------------------------------------------------------------------------------------------------------------------------------------------------------------------------------------------------------------------------------------------------------------------------------------------------------------------------------------------------------------------------------------------------------------------------------------------------------------------------------------------------------------------------------------------------------|----------------------------------------------------------------------------------------------------------------------------------------------------------------------------------------------------------------------------------------------------------------------------------------------------------------------------------------------------------------------------------------------------------------------------------------------------------------------------------------------------------------------------------------------------------------------------------------------------------------------------------------------------------------------------------------------------------------------------------------------------------------------------------------------------------------|-------------------------------------------------------------------------------------------------------------------------------------------------------------------------------------------------------------------------------------------------------------------------------------------------------------------------------------------------------------------------------------------------------------------------------------------------------------------------------------------------------------------------------------------------------------------------|
| <p>Medical Home Index (MHI)<br/> Multicountry Survey Study Responsiveness Questionnaire<br/> Parent’s Perceptions of Primary Care measure (P3C)<br/> Patient Acuity Case management Evaluation (PACE tool)<br/> Patient Career Diary<br/> Patient Experiences Questionnaire (PEQ)<br/> Patient Responses to Nursing Behaviours (PRNB)<br/> Patient trust in community pharmacists (TRUST-Ph)<br/> Patient-centered questionnaire (PCQ)<br/> Pediatric Patient-Family–Centered Care Benchmarking Survey<br/> Person-directed Care (PDC)<br/> Prostate Care Questionnaire for Patients (PCQ-P)<br/> Quality of end-of-life communication (QOC)<br/> Quality of Family Experience (QUAL-E FAM)<br/> Revised Health Care System Distrust Scale<br/> Service Quality Questionnaire<br/> Survivor Unmet Needs Survey (SUNS)<br/> Systematic Culture Inquiry On Patient safety in primary care (SCOPE)<br/> Trust in Oncologist Scale (TiOS)<br/> Trust in the Medical Profession<br/> Unnamed 22<br/> Unnamed 32<br/> Unnamed 34<br/> Unnamed 35</p> |                                                                                                                                                                                                                                                                                                                                                                                                                                                                                                                                                                                                                                                                                                                                                                                                                |                                                                                                                                                                                                                                                                                                                                                                                                                                                                                                                                                                         |
| <b>STRUCTURAL VALIDITY</b>                                                                                                                                                                                                                                                                                                                                                                                                                                                                                                                                                                                                                                                                                                                                                                                                                                                                                                                                                                                                                     |                                                                                                                                                                                                                                                                                                                                                                                                                                                                                                                                                                                                                                                                                                                                                                                                                |                                                                                                                                                                                                                                                                                                                                                                                                                                                                                                                                                                         |
| <p>Cancer services integration<br/> Caring Assessment Tool (CAT)<br/> Client-Centred Questionnaire<br/> General Practice Assessment Survey (GPAS)<br/> Health Care relationship (HCR) Trust Scale<br/> Multicountry Survey Study Responsiveness Questionnaire<br/> Nijmegen Continuity Questionnaire (NCQ)<br/> Patient Experiences Questionnaire (PEQ)<br/> Person-centred Climate Questionnaire (PCCQ)<br/> Person-Centred Health Care for Older Adults Survey<br/> Quality from Patient's Perspective<br/> Quality of end-of-life communication (QOC)<br/> Systematic Culture Inquiry On Patient safety in primary care (SCOPE)</p>                                                                                                                                                                                                                                                                                                                                                                                                         | <p>Cuestionario Continuidad Asistencial Entre Niveles de Atención (CCAENA)<br/> Cultural competence assessment instrument<br/> Hospital Survey of Patient Safety Culture (HSOPSC)<br/> Jefferson Scale of Physician Empathy<br/> Matched-pair instrument<br/> Parent’s Perceptions of Primary Care measure (P3C)<br/> Patient Continuity of Care Questionnaire (PCCQ)<br/> Patient-Doctor Relationship Questionnaire<br/> Person-centered care of Older People with Cognitive Impairment in Acute Care (POPAC)<br/> Person-directed Care (PDC)<br/> Prescriptions, Ready to reenter the community, Placement, Assurance of Safety, Realistic Expectations, Empowerment, Directed to appropriate services (PREPARED)<br/> Quality Care Questionnaire–End of Life (QCQ–EOL)<br/> Quality of Psychiatric Care</p> | <p>4-point Ordinal Alliance Scale (4PAS)<br/> Agnew Relationship Measure<br/> Assertive Community Treatment (TACT) Scale<br/> CPSO Peer Assessment<br/> ENDOCARE questionnaire (ECQ)<br/> General practice clinical linkages interviews (GPC-LI)<br/> Geriatric Care Environment Scale (GCES)<br/> Group-Based Medical Mistrust Scale (GBMMS)<br/> Handover Performance Tool (HPT)<br/> Hybrid tool from 3 questionnaires<br/> Inpatient-Treatment Alliance Scale (ITAS)<br/> Jones Synergy Scale<br/> Multidimensional Trust in Health Care Systems Scale (MTHCSS)</p> |

| Strong Evidence of Positive Findings (+++)                                                                                                                                                                            | Moderate Evidence of Positive Findings (++)                                                                                                                                                                                                                                                                                                                                                                                                                                                                                                                                                                                                                                                                                                                                                                                                                                                                                                                                                                                                                                                                                                                           | Limited Evidence of Positive Findings (+)                                                                                                                                                                                                                                                                                                                                                                                                                                                                                                                                                                                                                                                                                                                                                                                                                                                                                    |
|-----------------------------------------------------------------------------------------------------------------------------------------------------------------------------------------------------------------------|-----------------------------------------------------------------------------------------------------------------------------------------------------------------------------------------------------------------------------------------------------------------------------------------------------------------------------------------------------------------------------------------------------------------------------------------------------------------------------------------------------------------------------------------------------------------------------------------------------------------------------------------------------------------------------------------------------------------------------------------------------------------------------------------------------------------------------------------------------------------------------------------------------------------------------------------------------------------------------------------------------------------------------------------------------------------------------------------------------------------------------------------------------------------------|------------------------------------------------------------------------------------------------------------------------------------------------------------------------------------------------------------------------------------------------------------------------------------------------------------------------------------------------------------------------------------------------------------------------------------------------------------------------------------------------------------------------------------------------------------------------------------------------------------------------------------------------------------------------------------------------------------------------------------------------------------------------------------------------------------------------------------------------------------------------------------------------------------------------------|
| Trust in Oncologist Scale (TiOS)<br>Trust in the Medical Profession                                                                                                                                                   | Scale To Assess Therapeutic Relationships in Community Mental Health Care (STAR)<br>Unnamed 23<br>Unnamed 29<br>Unnamed 36<br>Unnamed 37<br>Unnamed 40                                                                                                                                                                                                                                                                                                                                                                                                                                                                                                                                                                                                                                                                                                                                                                                                                                                                                                                                                                                                                | Nursing Practice Models Questionnaire<br>Oncology Patients' Perception of the Quality of Nursing Care<br>Patient Perception of Patient-Centeredness Questionnaire (PPPCQ)<br>Patient-centred instrument for assessment of quality of breast cancer care<br>Patient-Doctor Depth of Relationship Scale<br>Patient-relevant hierarchy of needs<br>Pediatric Patient-Family-Centered Care Benchmarking Survey<br>Perceived Involvement in Care Scale<br>Team Emergency Assessment Measure (TEAM)<br>Unnamed 14<br>Unnamed 22<br>Unnamed 33<br>Unnamed 34<br>Unnamed 8                                                                                                                                                                                                                                                                                                                                                           |
| <b>CONSTRUCT VALIDITY (HYPOTHESIS TESTING)</b>                                                                                                                                                                        |                                                                                                                                                                                                                                                                                                                                                                                                                                                                                                                                                                                                                                                                                                                                                                                                                                                                                                                                                                                                                                                                                                                                                                       |                                                                                                                                                                                                                                                                                                                                                                                                                                                                                                                                                                                                                                                                                                                                                                                                                                                                                                                              |
| OutPatient Experiences Questionnaire (OPEQ)<br>Patient Activation Measure (PAM)<br>Patient Assessment of Chronic Illness Care (PACIC)<br>Quality of Care Through the Patients' Eyes (QUOTE)<br>Therapy Alliance Scale | Alberta Continuity of Services Scale-Mental Health<br>Better Jobs Better Care PCC instrument<br>California Psychotherapy Alliance Scales (CALPAS)<br>Client Perception of Coordination Questionnaire (CPCQ)<br>Consumer Assessment of Health Plans Survey (CAHPS)<br>Continuity of Care - User Measure (CONTINUUM)<br>Continuity of Care Practices Survey<br>Cuestionario Continuidad Asistencial Entre Niveles de Atención (CCAENA)<br>Cultural competence assessment instrument<br>Distrust of the healthcare system (DHS)<br>Family Assessment of Treatment at End of Life<br>Health Care System Distrust Scale<br>Heart Continuity of Care Questionnaire (HCCQ)<br>Kim Alliance Scale<br>Measure of Trust in Insurers<br>Measuring instrument for individualized care<br>Medical Care Questionnaire (MCQ)<br>Multicountry Survey Study Responsiveness Questionnaire<br>Observing patient involvement scale (OPTION)<br>Patient Continuity of Care Questionnaire (PCCQ)<br>Patient Reactions Assessment<br>Patient trust in community pharmacists (TRUST-Ph)<br>Patient-reported Interpersonal Processes of Care<br>Pediatric Trust in Physician Scale (Pedi-TiPS) | 4-point Ordinal Alliance Scale (4PAS)<br>Assertive Community Treatment (TACT) Scale<br>Client-Centred Rehabilitation Questionnaire<br>Collaboration And Satisfaction About Care Decisions<br>Family perceived involvement (F-INVOLVE)<br>Four Habits Coding Scheme (4HCS)<br>General Practice Assessment Questionnaire (GPAQ)<br>Giving Youth a Voice questionnaire (GYV)<br>Group-Based Medical Mistrust Scale (GBMMS)<br>Health Care Communication Questionnaire (HCCQ)<br>Patient Perceptions of Integrated Care Survey<br>Patient-Doctor Depth of Relationship Scale<br>Perceived Involvement in Care Scale<br>Person-centered Care Assessment Tool (P-CAT)<br>Primary Care Behavioral Health Provider Adherence Questionnaire (PPAQ)<br>Quality of End-of-life care and Satisfaction with Treatment (QUEST)<br>Trust in Nurses Scale<br>Unnamed 18<br>Unnamed 19<br>Unnamed 22<br>Unnamed 31<br>Unnamed 34<br>Unnamed 8 |

| Strong Evidence of Positive Findings (+++)                                                                                                                                                   | Moderate Evidence of Positive Findings (++)                                                                                                                                                                                                                                                                                                                                                | Limited Evidence of Positive Findings (+)                                                                                                                                                               |
|----------------------------------------------------------------------------------------------------------------------------------------------------------------------------------------------|--------------------------------------------------------------------------------------------------------------------------------------------------------------------------------------------------------------------------------------------------------------------------------------------------------------------------------------------------------------------------------------------|---------------------------------------------------------------------------------------------------------------------------------------------------------------------------------------------------------|
|                                                                                                                                                                                              | Person-directed Care (PDC)<br>Prescriptions, Ready to reenter the community, Placement, Assurance of Safety, Realistic Expectations, Empowerment, Directed to appropriate services (PREPARED)<br>Quality of end-of-life communication (QOC)<br>Quality of Psychiatric Care<br>SERVQUAL<br>Trust in the Medical Profession<br>Unnamed 23<br>Unnamed 40<br>Wake Forest Physician Trust Scale |                                                                                                                                                                                                         |
| <b>CRITERION VALIDITY</b>                                                                                                                                                                    |                                                                                                                                                                                                                                                                                                                                                                                            |                                                                                                                                                                                                         |
| Consumer Assessment of Behavioral Health Survey (CABHS)<br>Mental Health Statistics Improvement Program (MHSIP)<br>Primary Care Assessment Tool (PCAT)<br>Survivor Unmet Needs Survey (SUNS) | Family Assessment of Treatment at End of Life<br>Patient Activation Measure (PAM)<br>Quality of Care Through the Patients' Eyes (QUOTE)<br>Unnamed 40                                                                                                                                                                                                                                      | Components of Primary Care Index (CPCI)<br>Heart Continuity of Care Questionnaire (HCCQ)<br>Jones Synergy Scale<br>Primary Care Behavioral Health Provider Adherence Questionnaire (PPAQ)<br>Unnamed 31 |
| <b>RESPONSIVENESS</b>                                                                                                                                                                        |                                                                                                                                                                                                                                                                                                                                                                                            |                                                                                                                                                                                                         |
| None                                                                                                                                                                                         | None                                                                                                                                                                                                                                                                                                                                                                                       | None                                                                                                                                                                                                    |
