# Supplementary material
Source: PubMed Central journal article supplement (PMC5192798)
Supplement: MILQ-94-862-s007.pdf [file MILQ-94-862-s007.pdf]

## APPENDIX G

### Instruments grouped according to domain

#### CLINICAL INTEGRATION DOMAIN

|     | Index Instrument<br>(209 index instruments from 379 studies)        | Reference Study<br>(300 articles) | Year | Study<br>Code | Construct<br>classification             | Internal consistency | Reliability score | Measurement<br>error | Content validity<br>score | Structural<br>validity | Hypothesis<br>testing | Criterion<br>validity | Responsiveness |
|-----|---------------------------------------------------------------------|-----------------------------------|------|---------------|-----------------------------------------|----------------------|-------------------|----------------------|---------------------------|------------------------|-----------------------|-----------------------|----------------|
| 1.  | Continuity of Care in Children's Mental Health (C3MH)               | Tobon, J. I. <sup>1</sup>         | 2013 | 357           | care continuity /<br>comprehensive care | excellent            | good              | not assessed         | excellent                 | poor                   | excellent             | good                  | not assessed   |
| 2.  | Alberta Continuity of Services Scale-Mental Health                  | Durbin, J. <sup>2</sup>           | 2004 | 110           | care continuity /<br>comprehensive care | excellent            | not assessed      | not assessed         | excellent                 | excellent              | poor                  | not assessed          | not assessed   |
| 3.  | Alberta Continuity of Services Scale-Mental Health                  | Joyce, A. S. <sup>3</sup>         | 2010 | 206           | care continuity /<br>comprehensive care | excellent            | not assessed      | poor                 | not assessed              | excellent              | good                  | not assessed          | not assessed   |
| 4.  | Care Continuity Instrument                                          | Bull, M. J. <sup>4</sup>          | 2000 | 64            | care continuity /<br>comprehensive care | fair                 | poor              | not assessed         | fair                      | fair                   | not assessed          | not assessed          | poor           |
| 5.  | Care Continuity Instrument                                          | Bull, M. J. <sup>4</sup>          | 2000 | 63            | care continuity /<br>comprehensive care | fair                 | poor              | not assessed         | fair                      | fair                   | not assessed          | not assessed          | poor           |
| 6.  | Care Transition Measure (CTM)                                       | Bakshi <sup>5</sup>               | 2012 | 27            | care continuity /<br>comprehensive care | fair                 | not assessed      | poor                 | not assessed              | fair                   | fair                  | poor                  | not assessed   |
| 7.  | Care Transition Measure (CTM)                                       | Bakshi <sup>5</sup>               | 2012 | 25            | care continuity /<br>comprehensive care | fair                 | not assessed      | poor                 | not assessed              | fair                   | fair                  | poor                  | not assessed   |
| 8.  | Care Transition Measure (CTM)                                       | Bakshi <sup>5</sup>               | 2012 | 28            | care continuity /<br>comprehensive care | fair                 | not assessed      | poor                 | not assessed              | fair                   | fair                  | poor                  | not assessed   |
| 9.  | Care Transition Measure (CTM)                                       | Bakshi <sup>5</sup>               | 2012 | 26            | care continuity /<br>comprehensive care | fair                 | not assessed      | poor                 | not assessed              | fair                   | fair                  | poor                  | not assessed   |
| 10. | Care Transition Measure (CTM)                                       | Parry <sup>6</sup>                | 2008 | 278           | care continuity /<br>comprehensive care | poor                 | not assessed      | not assessed         | not assessed              | poor                   | fair                  | not assessed          | not assessed   |
| 11. | Care Transition Measure (CTM)                                       | Coleman <sup>7</sup>              | 2005 | 439           | care continuity /<br>comprehensive care | excellent            | not assessed      | not assessed         | excellent                 | excellent              | good                  | not assessed          | not assessed   |
| 12. | Care Transition Measure (CTM)                                       | Coleman <sup>8</sup>              | 2002 | 440           | care continuity /<br>comprehensive care | poor                 | not assessed      | not assessed         | excellent                 | not assessed           | good                  | poor                  | not assessed   |
| 13. | Care Transition Measure (CTM)                                       | Shadmi <sup>9</sup>               | 2009 | 584           | care continuity /<br>comprehensive care | excellent            | not assessed      | not assessed         | not assessed              | excellent              | good                  | not assessed          | not assessed   |
| 14. | Care Transition Measure (CTM)                                       | Shadmi <sup>9</sup>               | 2009 | 583           | care continuity /<br>comprehensive care | excellent            | not assessed      | not assessed         | not assessed              | excellent              | good                  | not assessed          | not assessed   |
| 15. | <b>Components of Primary Care Index (CPCI)</b>                      | Haggerty, J. L. <sup>10</sup>     | 2011 | 160           | care continuity /<br>comprehensive care | excellent            | not assessed      | not assessed         | excellent                 | excellent              | not assessed          | not assessed          | not assessed   |
| 16. | <b>Components of Primary Care Index (CPCI)</b>                      | Haggerty, J. L. <sup>10</sup>     | 2011 | 157           | care continuity /<br>comprehensive care | excellent            | not assessed      | not assessed         | excellent                 | excellent              | not assessed          | not assessed          | not assessed   |
| 17. | CONNECT                                                             | Chavez, L. M. <sup>11</sup>       | 2007 | 75            | care continuity /<br>comprehensive care | poor                 | good              | not assessed         | excellent                 | not assessed           | poor                  | not assessed          | not assessed   |
| 18. | CONNECT                                                             | Ware, N. C. <sup>12</sup>         | 2003 | 382           | care continuity /<br>comprehensive care | poor                 | fair              | not assessed         | good                      | not assessed           | fair                  | not assessed          | not assessed   |
| 19. | Continuity of Care - User Measure (CONTINUUM)                       | Rose, D. <sup>13</sup>            | 2009 | 297           | care continuity /<br>comprehensive care | not assessed         | fair              | not assessed         | fair                      | not assessed           | poor                  | not assessed          | not assessed   |
| 20. | Continuity of Care - User Measure (CONTINUUM)                       | Sweeney, A. <sup>14</sup>         | 2012 | 352           | care continuity /<br>comprehensive care | excellent            | not assessed      | not assessed         | not assessed              | excellent              | good                  | not assessed          | not assessed   |
| 21. | Continuity of Care in Children's Mental Health (C3MH)               | Tobon, J. I. <sup>1</sup>         | 2013 | 358           | care continuity /<br>comprehensive care | excellent            | not assessed      | not assessed         | excellent                 | poor                   | excellent             | good                  | not assessed   |
| 22. | Continuity of Care Practices Survey                                 | Schaefer, J. A. <sup>15</sup>     | 2004 | 307           | care continuity /<br>comprehensive care | poor                 | not assessed      | not assessed         | good                      | not assessed           | fair                  | not assessed          | not assessed   |
| 23. | Continuity of Care Practices Survey                                 | Schaefer, J. A. <sup>15</sup>     | 2004 | 308           | care continuity /<br>comprehensive care | poor                 | not assessed      | not assessed         | good                      | not assessed           | fair                  | not assessed          | not assessed   |
| 24. | Diabetes Continuity of Care Scale (DCCS)                            | Dolovich, L. R. <sup>16</sup>     | 2004 | 107           | care continuity /<br>comprehensive care | poor                 | fair              | not assessed         | excellent                 | poor                   | fair                  | not assessed          | not assessed   |
| 25. | Experienced continuity of care for diabetes mellitus (ECC-DM)       | Gulliford, M. C. <sup>17</sup>    | 2006 | 153           | care continuity /<br>comprehensive care | excellent            | good              | poor                 | not assessed              | good                   | not assessed          | good                  | not assessed   |
| 26. | General practice clinical linkages interviews (GPC-LI) <sup>^</sup> | Amoroso, C. <sup>18</sup>         | 2007 | 11            | care continuity /<br>comprehensive care | fair                 | poor              | poor                 | not assessed              | fair                   | fair                  | not assessed          | not assessed   |
| 27. | Heart Continuity of Care Questionnaire (HCCQ)                       | Kowalyk, K. M. <sup>19</sup>      | 2004 | 223           | care continuity /<br>comprehensive care | poor                 | not assessed      | not assessed         | poor                      | not assessed           | fair                  | fair                  | not assessed   |
| 28. | Hybrid tool from 3 questionnaires                                   | Burns, T. <sup>20</sup>           | 2009 | 65            | care continuity /<br>comprehensive care | fair                 | not assessed      | not assessed         | good                      | fair                   | not assessed          | not assessed          | not assessed   |
| 29. | Measure of Experienced Continuity of Care (MECC)                    | King, M. <sup>21</sup>            | 2008 | 216           | care continuity /<br>comprehensive care | poor                 | fair              | not assessed         | fair                      | not assessed           | poor                  | not assessed          | not assessed   |
| 30. | National health and health services use questionnaire               | Bentler, S. E. <sup>22</sup>      | 2014 | 45            | care continuity /<br>comprehensive care | fair                 | not assessed      | poor                 | not assessed              | not assessed           | fair                  | fair                  | not assessed   |
| 31. | Nijmegen Continuity Questionnaire (NCQ)                             | Uijen, A. A. <sup>23</sup>        | 2011 | 366           | care continuity /<br>comprehensive care | good                 | not assessed      | not assessed         | good                      | good                   | good                  | not assessed          | not assessed   |
| 32. | Nijmegen Continuity Questionnaire (NCQ)                             | Uijen, A. A. <sup>24</sup>        | 2012 | 367           | care continuity /<br>comprehensive care | good                 | good              | not assessed         | not assessed              | excellent              | good                  | not assessed          | not assessed   |

|     | <b>Index Instrument<br/>(209 index instruments from 379 studies)</b>                                                                                            | <b>Reference Study<br/>(300 articles)</b> | <b>Year</b> | <b>Study<br/>Code</b> | <b>Construct<br/>classification</b>  | <b>Internal consistency</b> | <b>Reliability score</b> | <b>Measurement<br/>error</b> | <b>Content validity<br/>score</b> | <b>Structural<br/>validity</b> | <b>Hypothesis<br/>testing</b> | <b>Criterion<br/>validity</b> | <b>Responsiveness</b> |
|-----|-----------------------------------------------------------------------------------------------------------------------------------------------------------------|-------------------------------------------|-------------|-----------------------|--------------------------------------|-----------------------------|--------------------------|------------------------------|-----------------------------------|--------------------------------|-------------------------------|-------------------------------|-----------------------|
| 33. | Parents' Perceptions of Continuity Scale (PPCS)                                                                                                                 | Epstein, E. G. <sup>25</sup>              | 2013        | 122                   | care continuity / comprehensive care | poor                        | not assessed             | not assessed                 | excellent                         | not assessed                   | good                          | not assessed                  | not assessed          |
| 34. | Patient Continuity of Care Questionnaire (PCCQ)                                                                                                                 | Hadjistavropoulos, H. <sup>26</sup>       | 2008        | 154                   | care continuity / comprehensive care | good                        | not assessed             | not assessed                 | not assessed                      | good                           | good                          | not assessed                  | not assessed          |
| 35. | Patient's Perception of Continuity (PC)                                                                                                                         | Chao, J. <sup>27</sup>                    | 1988        | 71                    | care continuity / comprehensive care | fair                        | not assessed             | not assessed                 | fair                              | fair                           | not assessed                  | poor                          | not assessed          |
| 36. | Postoperative Handover Assessment Tool (PoHAT)                                                                                                                  | Nagpal, K. <sup>28</sup>                  | 2011        | 264                   | care continuity / comprehensive care | not assessed                | fair                     | not assessed                 | fair                              | not assessed                   | fair                          | not assessed                  | not assessed          |
| 37. | <b>Primary Care Assessment Tool (PCAT)</b>                                                                                                                      | Haggerty <sup>10</sup>                    | 2011        | 159                   | care continuity / comprehensive care | excellent                   | not assessed             | not assessed                 | excellent                         | excellent                      | not assessed                  | not assessed                  | not assessed          |
| 38. | <b>Primary Care Assessment Tool (PCAT)</b>                                                                                                                      | Haggerty <sup>29</sup>                    | 2011        | 477                   | care continuity / comprehensive care | excellent                   | not assessed             | not assessed                 | not assessed                      | excellent                      | not assessed                  | not assessed                  | not assessed          |
| 39. | <b>Primary Care Assessment Tool (PCAT)</b>                                                                                                                      | Haggerty <sup>30</sup>                    | 2011        | 483                   | care continuity / comprehensive care | excellent                   | not assessed             | not assessed                 | not assessed                      | excellent                      | not assessed                  | not assessed                  | not assessed          |
| 40. | Relational and management continuity of care Questionnaire                                                                                                      | Gulliford, M. <sup>31</sup>               | 2011        | 152                   | care continuity / comprehensive care | fair                        | not assessed             | not assessed                 | fair                              | fair                           | not assessed                  | not assessed                  | not assessed          |
| 41. | Systematic Monitoring of Male Circumcision Scale-Up                                                                                                             | Omondi Aduda <sup>32</sup>                | 2014        | 639                   | care continuity / comprehensive care | not assessed                | not assessed             | not assessed                 | not assessed                      | good                           | not assessed                  | not assessed                  | not assessed          |
| 42. | Unnamed 12                                                                                                                                                      | McLaughlin, S. E. <sup>33</sup>           | 2008        | 252                   | care continuity / comprehensive care | poor                        | fair                     | not assessed                 | good                              | not assessed                   | not assessed                  | not assessed                  | not assessed          |
| 43. | Unnamed 8                                                                                                                                                       | Masters, S. <sup>34</sup>                 | 2010        | 243                   | care continuity / comprehensive care | fair                        | fair                     | not assessed                 | not assessed                      | fair                           | fair                          | fair                          | not assessed          |
| 44. | Assertive Community Treatment (TACT) Scale                                                                                                                      | Wholey, D. R. <sup>35</sup>               | 2012        | 390                   | care coordination / case management  | fair                        | fair                     | not assessed                 | good                              | fair                           | fair                          | not assessed                  | not assessed          |
| 45. | Case Management Quality Questionnaire (CMQQ)                                                                                                                    | Hadjistavropoulos, H. D. <sup>36</sup>    | 2003        | 156                   | care coordination / case management  | excellent                   | not assessed             | not assessed                 | excellent                         | excellent                      | not assessed                  | not assessed                  | not assessed          |
| 46. | Client Perception of Coordination Questionnaire (CPCQ)                                                                                                          | McGuiness, C. <sup>37</sup>               | 2003        | 250                   | care coordination / case management  | good                        | not assessed             | not assessed                 | good                              | good                           | good                          | not assessed                  | not assessed          |
| 47. | Patient Acuity Case management Evaluation (PACE tool)                                                                                                           | Balstad, A. <sup>38</sup>                 | 2006        | 29                    | care coordination / case management  | not assessed                | poor                     | not assessed                 | excellent                         | poor                           | poor                          | not assessed                  | not assessed          |
| 48. | Prescriptions, Ready to reenter the community, Placement, Assurance of Safety, Realistic Expectations, Empowerment, Directed to appropriate services (PREPARED) | Grimmer <sup>39</sup>                     | 2001        | 470                   | care coordination / case management  | not assessed                | not assessed             | not assessed                 | excellent                         | good                           | good                          | good                          | not assessed          |
| 49. | Unnamed 16                                                                                                                                                      | Samele, C. <sup>40</sup>                  | 2002        | 305                   | care coordination / case management  | not assessed                | not assessed             | not assessed                 | not assessed                      | poor                           | poor                          | not assessed                  | not assessed          |
| 50. | Unnamed 36                                                                                                                                                      | Young <sup>41</sup>                       | 2011        | 631                   | care coordination / case management  | good                        | good                     | not assessed                 | excellent                         | good                           | not assessed                  | not assessed                  | not assessed          |
| 51. | Cancer services integration                                                                                                                                     | Dobrow, M. J. <sup>42</sup>               | 2009        | 106                   | care integration                     | excellent                   | not assessed             | not assessed                 | good                              | excellent                      | fair                          | not assessed                  | not assessed          |
| 52. | Care Process Self Evaluation Tool (CPSET)                                                                                                                       | Seys, D. <sup>43</sup>                    | 2013        | 376                   | care integration                     | fair                        | fair                     | not assessed                 | excellent                         | fair                           | fair                          | fair                          | not assessed          |
| 53. | Care Process Self Evaluation Tool (CPSET)                                                                                                                       | Vanhaecht, K. <sup>44</sup>               | 2007        | 319                   | care integration                     | fair                        | not assessed             | not assessed                 | not assessed                      | fair                           | not assessed                  | not assessed                  | not assessed          |
| 54. | Caregivers' Satisfaction with Stroke Care Questionnaire: C-SASC                                                                                                 | Cramm <sup>45</sup>                       | 2011        | 443                   | care integration                     | good                        | not assessed             | not assessed                 | not assessed                      | good                           | not assessed                  | not assessed                  | not assessed          |
| 55. | CareWell in Hospital Questionnaire                                                                                                                              | Bakker, F. C. <sup>46</sup>               | 2014        | 24                    | care integration                     | poor                        | fair                     | not assessed                 | fair                              | not assessed                   | poor                          | not assessed                  | poor                  |
| 56. | <b>Components of Primary Care Index (CPCI)</b>                                                                                                                  | Flocke, S. A. <sup>47</sup>               | 1997        | 130                   | care integration                     | fair                        | not assessed             | not assessed                 | fair                              | not assessed                   | fair                          | fair                          | not assessed          |
| 57. | Consumer Assessment of Health Plans Survey (CAHPS)                                                                                                              | Scholle, S. H. <sup>48</sup>              | 2012        | 310                   | care integration                     | fair                        | poor                     | not assessed                 | good                              | good                           | not assessed                  | not assessed                  | not assessed          |
| 58. | Consumer Assessment of Health Plans Survey (CAHPS)                                                                                                              | Scholle, S. H. <sup>48</sup>              | 2012        | 311                   | care integration                     | fair                        | poor                     | not assessed                 | good                              | good                           | not assessed                  | not assessed                  | not assessed          |
| 59. | Consumer Assessment of Health Plans Survey (CAHPS)                                                                                                              | Arah <sup>49</sup>                        | 2006        | 412                   | care integration                     | good                        | not assessed             | not assessed                 | excellent                         | good                           | not assessed                  | not assessed                  | not assessed          |
| 60. | Consumer Assessment of Health Plans Survey (CAHPS)                                                                                                              | Gallagher <sup>50</sup>                   | 2009        | 463                   | care integration                     | poor                        | not assessed             | not assessed                 | excellent                         | good                           | not assessed                  | not assessed                  | not assessed          |
| 61. | Consumer Assessment of Health Plans Survey (CAHPS)                                                                                                              | Hargraves <sup>51</sup>                   | 2003        | 492                   | care integration                     | excellent                   | not assessed             | not assessed                 | excellent                         | excellent                      | not assessed                  | not assessed                  | not assessed          |
| 62. | Consumer Assessment of Health Plans Survey (CAHPS)                                                                                                              | Hays <sup>52</sup>                        | 1999        | 497                   | care integration                     | fair                        | not assessed             | not assessed                 | excellent                         | good                           | not assessed                  | not assessed                  | not assessed          |
| 63. | Consumer Assessment of Health Plans Survey (CAHPS)                                                                                                              | Hays <sup>52</sup>                        | 1999        | 498                   | care integration                     | fair                        | not assessed             | not assessed                 | excellent                         | good                           | not assessed                  | not assessed                  | not assessed          |
| 64. | Consumer Assessment of Health Plans Survey (CAHPS)                                                                                                              | Hays <sup>52</sup>                        | 1999        | 499                   | care integration                     | fair                        | not assessed             | not assessed                 | excellent                         | good                           | not assessed                  | not assessed                  | not assessed          |
| 65. | Consumer Assessment of Health Plans Survey (CAHPS)                                                                                                              | Hays <sup>52</sup>                        | 1999        | 500                   | care integration                     | fair                        | not assessed             | not assessed                 | excellent                         | good                           | not assessed                  | not assessed                  | not assessed          |
| 66. | Consumer Assessment of Health Plans Survey (CAHPS)                                                                                                              | Solomon <sup>53</sup>                     | 2005        | 594                   | care integration                     | fair                        | fair                     | not assessed                 | excellent                         | fair                           | fair                          | not assessed                  | not assessed          |
| 67. | Consumer Assessment of Health Plans Survey (CAHPS)                                                                                                              | Solomon <sup>53</sup>                     | 2005        | 595                   | care integration                     | fair                        | fair                     | not assessed                 | excellent                         | fair                           | fair                          | not assessed                  | not assessed          |
| 68. | Consumer Perceptions of Care (CPC)                                                                                                                              | Clark, C. <sup>54</sup>                   | 2008        | 79                    | care integration                     | excellent                   | good                     | not assessed                 | excellent                         | excellent                      | not assessed                  | good                          | not assessed          |
| 69. | <b>Consumer Quality Index (CQI)</b>                                                                                                                             | Berendsen, A. J. <sup>55</sup>            | 2009        | 46                    | care integration                     | excellent                   | not assessed             | not assessed                 | excellent                         | excellent                      | poor                          | not assessed                  | not assessed          |
| 70. | <b>Consumer Quality Index (CQI)</b>                                                                                                                             | Booij, J. C. <sup>56</sup>                | 2013        | 56                    | care integration                     | fair                        | not assessed             | not assessed                 | not assessed                      | fair                           | not assessed                  | not assessed                  | not assessed          |
| 71. | <b>Consumer Quality Index (CQI)</b>                                                                                                                             | Booij, J. C. <sup>56</sup>                | 2013        | 57                    | care integration                     | poor                        | not assessed             | not assessed                 | not assessed                      | fair                           | not assessed                  | not assessed                  | not assessed          |
| 72. | <b>Consumer Quality Index (CQI)</b>                                                                                                                             | Howie <sup>57</sup>                       | 2000        | 509                   | care integration                     | poor                        | not assessed             | not assessed                 | excellent                         | poor                           | not assessed                  | not assessed                  | not assessed          |
| 73. | <b>Consumer Quality Index (CQI)</b>                                                                                                                             | Stubbe <sup>58</sup>                      | 2007        | 600                   | care integration                     | excellent                   | good                     | not assessed                 | not assessed                      | excellent                      | good                          | not assessed                  | not assessed          |
| 74. | <b>Consumer Quality Index (CQI)</b>                                                                                                                             | Stubbe <sup>59</sup>                      | 2007        | 601                   | care integration                     | excellent                   | good                     | not assessed                 | not assessed                      | excellent                      | good                          | not assessed                  | not assessed          |
| 75. | <b>Consumer Quality Index (CQI)</b>                                                                                                                             | Triemstra <sup>60</sup>                   | 2010        | 614                   | care integration                     | fair                        | not assessed             | not assessed                 | not assessed                      | fair                           | not assessed                  | not assessed                  | not assessed          |
| 76. | <b>Consumer Quality Index (CQI)</b>                                                                                                                             | Triemstra <sup>60</sup>                   | 2010        | 615                   | care integration                     | fair                        | not assessed             | not assessed                 | not assessed                      | fair                           | not assessed                  | not assessed                  | not assessed          |
| 77. | <b>Consumer Quality Index (CQI)</b>                                                                                                                             | Triemstra <sup>60</sup>                   | 2010        | 616                   | care integration                     | fair                        | not assessed             | not assessed                 | not assessed                      | fair                           | not assessed                  | not assessed                  | not assessed          |
| 78. | CPSO Peer Assessment                                                                                                                                            | Wenghofer, E. F. <sup>61</sup>            | 2006        | 386                   | care integration                     | fair                        | not assessed             | not assessed                 | excellent                         | fair                           | fair                          | not assessed                  | not assessed          |
| 79. | DELTA service user assessment                                                                                                                                   | Ahgren, B. <sup>62</sup>                  | 2009        | 7                     | care integration                     | poor                        | not assessed             | not assessed                 | fair                              | poor                           | not assessed                  | not assessed                  | not assessed          |
| 80. | Dual Diagnosis Capability in Healthcare Settings (DDCHCS)                                                                                                       | McGovern, M. P. <sup>63</sup>             | 2012        | 249                   | care integration                     | poor                        | poor                     | not assessed                 | not assessed                      | not assessed                   | not assessed                  | not assessed                  | not assessed          |
| 81. | General Practice Assessment Questionnaire (GPAQ)                                                                                                                | Jaturapatporn, D. <sup>64</sup>           | 2006        | 200                   | care integration                     | fair                        | not assessed             | not assessed                 | fair                              | fair                           | not assessed                  | not assessed                  | not assessed          |
| 82. | General Practice Assessment Questionnaire (GPAQ)                                                                                                                | Mead <sup>65</sup>                        | 2008        | 546                   | care integration                     | good                        | not assessed             | not assessed                 | excellent                         | excellent                      | not assessed                  | not assessed                  | not assessed          |
| 83. | General Practice Assessment Questionnaire (GPAQ)                                                                                                                | Mead <sup>65</sup>                        | 2008        | 545                   | care integration                     | good                        | not assessed             | not assessed                 | excellent                         | excellent                      | not assessed                  | not assessed                  | not assessed          |

|      | Index Instrument<br>(209 index instruments from 379 studies) | Reference Study<br>(300 articles) | Year | Study<br>Code | Construct<br>classification | Internal consistency | Reliability score | Measurement<br>error | Content validity<br>score | Structural<br>validity | Hypothesis<br>testing | Criterion<br>validity | Responsiveness |
|------|--------------------------------------------------------------|-----------------------------------|------|---------------|-----------------------------|----------------------|-------------------|----------------------|---------------------------|------------------------|-----------------------|-----------------------|----------------|
| 84.  | General Practice Assessment Survey (GPAS)                    | Ramsay, J. <sup>66</sup>          | 2000 | 293           | care integration            | poor                 | poor              | not assessed         | not assessed              | not assessed           | fair                  | not assessed          | not assessed   |
| 85.  | General Practice Assessment Survey (GPAS)                    | Bower <sup>67</sup>               | 2002 | 428           | care integration            | not assessed         | not assessed      | not assessed         | excellent                 | good                   | good                  | not assessed          | not assessed   |
| 86.  | General Practice Assessment Survey (GPAS)                    | Jayasinghe, U. W. <sup>68</sup>   | 2008 | 202           | care integration            | excellent            | not assessed      | poor                 | excellent                 | excellent              | not assessed          | poor                  | not assessed   |
| 87.  | General Practice Patient Survey                              | Lyratzopoulos, G. <sup>69</sup>   | 2011 | 240           | care integration            | poor                 | fair              | not assessed         | poor                      | not assessed           | not assessed          | not assessed          | not assessed   |
| 88.  | Kim Alliance Scale                                           | Kim <sup>70</sup>                 | 2001 | 517           | care integration            | good                 | not assessed      | not assessed         | excellent                 | good                   | good                  | not assessed          | not assessed   |
| 89.  | Measure of Processes of Care (MPOC)                          | Bjerre, I. M. <sup>71</sup>       | 2004 | 52            | care integration            | fair                 | not assessed      | not assessed         | not assessed              | fair                   | not assessed          | not assessed          | not assessed   |
| 90.  | Measure of Processes of Care (MPOC)                          | Himuro, N. <sup>72</sup>          | 2013 | 174           | care integration            | good                 | good              | not assessed         | excellent                 | good                   | not assessed          | good                  | not assessed   |
| 91.  | Measure of Processes of Care (MPOC)                          | Himuro, N. <sup>72</sup>          | 2013 | 175           | care integration            | good                 | good              | not assessed         | excellent                 | good                   | not assessed          | good                  | not assessed   |
| 92.  | Measure of Processes of Care (MPOC)                          | Klassen, A. F. <sup>73</sup>      | 2009 | 217           | care integration            | excellent            | not assessed      | not assessed         | not assessed              | excellent              | good                  | not assessed          | not assessed   |
| 93.  | Measure of Processes of Care (MPOC)                          | Siebes <sup>74</sup>              | 2007 | 591           | care integration            | good                 | good              | not assessed         | not assessed              | good                   | good                  | not assessed          | not assessed   |
| 94.  | Measure of Processes of Care (MPOC)                          | King <sup>75</sup>                | 1996 | 519           | care integration            | fair                 | fair              | not assessed         | good                      | fair                   | good                  | not assessed          | not assessed   |
| 95.  | Measure of Processes of Care (MPOC)                          | Tang, H. N. <sup>76</sup>         | 2012 | 353           | care integration            | fair                 | not assessed      | not assessed         | not assessed              | fair                   | fair                  | not assessed          | not assessed   |
| 96.  | Measure of Processes of Care (MPOC)                          | King <sup>77</sup>                | 2004 | 518           | care integration            | good                 | good              | not assessed         | excellent                 | good                   | good                  | good                  | not assessed   |
| 97.  | Measure of Processes of Care (MPOC)                          | Saloojee, G. M. <sup>78</sup>     | 2009 | 304           | care integration            | fair                 | fair              | not assessed         | fair                      | fair                   | fair                  | not assessed          | not assessed   |
| 98.  | Measure of Processes of Care (MPOC)                          | McConachie <sup>79</sup>          | 2003 | 538           | care integration            | fair                 | not assessed      | not assessed         | not assessed              | fair                   | fair                  | not assessed          | not assessed   |
| 99.  | Measure of Processes of Care (MPOC)                          | McConachie <sup>79</sup>          | 2003 | 539           | care integration            | fair                 | not assessed      | not assessed         | not assessed              | fair                   | fair                  | not assessed          | not assessed   |
| 100. | Measure of Processes of Care (MPOC)                          | McConachie <sup>79</sup>          | 2003 | 540           | care integration            | fair                 | not assessed      | not assessed         | not assessed              | fair                   | fair                  | not assessed          | not assessed   |
| 101. | Measure of Processes of Care (MPOC)                          | McConachie <sup>79</sup>          | 2003 | 541           | care integration            | fair                 | not assessed      | not assessed         | not assessed              | fair                   | fair                  | not assessed          | not assessed   |
| 102. | Measure of Processes of Care (MPOC)                          | McConachie <sup>79</sup>          | 2003 | 542           | care integration            | fair                 | not assessed      | not assessed         | not assessed              | fair                   | fair                  | not assessed          | not assessed   |
| 103. | Medical Care Questionnaire (MCQ)                             | Harley, C. <sup>80</sup>          | 2009 | 167           | care integration            | excellent            | not assessed      | not assessed         | excellent                 | excellent              | good                  | not assessed          | not assessed   |
| 104. | Mental Health Statistics Improvement Program (MHSIP)         | Eisen <sup>81</sup>               | 2001 | 456           | care integration            | excellent            | not assessed      | not assessed         | excellent                 | excellent              | not assessed          | excellent             | not assessed   |
| 105. | New Zealand General Practice Assessment Questionnaire        | Zwier, G. <sup>82</sup>           | 2013 | 406           | care integration            | poor                 | fair              | not assessed         | not assessed              | not assessed           | fair                  | not assessed          | not assessed   |
| 106. | Nursing Practice Models Questionnaire                        | Mueller, C. <sup>83</sup>         | 2010 | 262           | care integration            | fair                 | not assessed      | not assessed         | fair                      | fair                   | not assessed          | not assessed          | not assessed   |
| 107. | Outcomes index<br>(measure of person-centered planning)^^^   | Holburn, S. <sup>84</sup>         | 2000 | 182           | care integration            | poor                 | poor              | not assessed         | excellent                 | poor                   | not assessed          | not assessed          | not assessed   |
| 108. | Pain Care Quality (PainCQ)                                   | Pett, M. A. <sup>85</sup>         | 2013 | 285           | care integration            | fair                 | not assessed      | not assessed         | not assessed              | fair                   | fair                  | not assessed          | not assessed   |
| 109. | Pain Care Quality (PainCQ)                                   | Pett, M. A. <sup>85</sup>         | 2013 | 286           | care integration            | fair                 | not assessed      | not assessed         | not assessed              | fair                   | fair                  | not assessed          | not assessed   |
| 110. | Parent's Perceptions of Primary Care measure (P3C)           | Seid <sup>86</sup>                | 2001 | 581           | care integration            | good                 | not assessed      | not assessed         | excellent                 | good                   | good                  | not assessed          | not assessed   |
| 111. | Patient Assessment of Chronic Illness Care (PACIC)           | Cramm, J. M. <sup>87</sup>        | 2012 | 93            | care integration            | excellent            | not assessed      | not assessed         | not assessed              | excellent              | not assessed          | not assessed          | poor           |
| 112. | Patient Assessment of Chronic Illness Care (PACIC)           | Cramm, J. M. <sup>87</sup>        | 2012 | 94            | care integration            | excellent            | not assessed      | not assessed         | not assessed              | excellent              | not assessed          | not assessed          | poor           |
| 113. | Patient Assessment of Chronic Illness Care (PACIC)           | Gugiu, P. C. <sup>88</sup>        | 2009 | 151           | care integration            | fair                 | poor              | not assessed         | excellent                 | fair                   | fair                  | not assessed          | not assessed   |
| 114. | Patient Assessment of Chronic Illness Care (PACIC)           | Rosemann, T. <sup>89</sup>        | 2007 | 298           | care integration            | fair                 | fair              | not assessed         | poor                      | fair                   | fair                  | not assessed          | not assessed   |
| 115. | Patient Assessment of Chronic Illness Care (PACIC)           | Aragones <sup>90</sup>            | 2008 | 411           | care integration            | good                 | good              | fair                 | excellent                 | good                   | not assessed          | not assessed          | not assessed   |
| 116. | Patient Assessment of Chronic Illness Care (PACIC)           | Gugiu <sup>91</sup>               | 2010 | 473           | care integration            | excellent            | not assessed      | not assessed         | excellent                 | excellent              | good                  | not assessed          | not assessed   |
| 117. | Patient Assessment of Chronic Illness Care (PACIC)           | Wensing <sup>92</sup>             | 2008 | 624           | care integration            | excellent            | poor              | not assessed         | excellent                 | excellent              | good                  | not assessed          | not assessed   |
| 118. | Patient Career Diary                                         | Baker <sup>93</sup>               | 1999 | 418           | care integration            | good                 | not assessed      | poor                 | excellent                 | good                   | not assessed          | not assessed          | not assessed   |
| 119. | Patient Experiences Questionnaire (PEQ)                      | Steine <sup>94</sup>              | 2001 | 597           | care integration            | excellent            | not assessed      | not assessed         | excellent                 | excellent              | good                  | not assessed          | not assessed   |
| 120. | Patient Experiences Questionnaire (PEQ)                      | Pettersen <sup>95</sup>           | 2004 | 565           | care integration            | excellent            | good              | not assessed         | not assessed              | excellent              | good                  | not assessed          | not assessed   |
| 121. | Patient-Centered Medical Home tool (PCMH)                    | Alexander, J. A. <sup>96</sup>    | 2013 | 9             | care integration            | not assessed         | not assessed      | not assessed         | not assessed              | poor                   | not assessed          | not assessed          | poor           |
| 122. | <b>Primary Care Assessment Tool (PCAT)</b>                   | Shi <sup>97</sup>                 | 2001 | 589           | care integration            | good                 | not assessed      | not assessed         | excellent                 | good                   | not assessed          | not assessed          | not assessed   |
| 123. | <b>Primary Care Assessment Tool (PCAT)</b>                   | Jeon, K. Y. <sup>98</sup>         | 2011 | 203           | care integration            | excellent            | fair              | poor                 | not assessed              | poor                   | good                  | excellent             | not assessed   |
| 124. | <b>Primary Care Assessment Tool (PCAT)</b>                   | Jeon, K. Y. <sup>98</sup>         | 2011 | 204           | care integration            | excellent            | fair              | poor                 | not assessed              | poor                   | good                  | excellent             | not assessed   |
| 125. | <b>Primary Care Assessment Tool (PCAT)</b>                   | Lee <sup>99</sup>                 | 2009 | 525           | care integration            | excellent            | not assessed      | not assessed         | excellent                 | excellent              | good                  | not assessed          | not assessed   |
| 126. | <b>Primary Care Assessment Tool (PCAT)</b>                   | Macinko <sup>100</sup>            | 2007 | 531           | care integration            | excellent            | not assessed      | not assessed         | not assessed              | good                   | good                  | not assessed          | not assessed   |
| 127. | Processes Index (measure of person-centered planning)^^^     | Holburn, S. <sup>84</sup>         | 2000 | 181           | care integration            | poor                 | poor              | not assessed         | excellent                 | poor                   | not assessed          | not assessed          | not assessed   |
| 128. | Prostate Care Questionnaire for Patients (PCQ-P)             | Tarrant <sup>101</sup>            | 2009 | 608           | care integration            | good                 | good              | not assessed         | excellent                 | good                   | good                  | not assessed          | not assessed   |
| 129. | Quality Care Questionnaire-End of Life (QCQ-EOL)             | Yun <sup>102</sup>                | 2006 | 632           | care integration            | good                 | not assessed      | not assessed         | excellent                 | good                   | not assessed          | not assessed          | not assessed   |
| 130. | Quality of Care Through the Patients' Eyes (QUOTE)           | Sixma <sup>103</sup>              | 2000 | 592           | care integration            | fair                 | not assessed      | not assessed         | excellent                 | fair                   | not assessed          | not assessed          | not assessed   |
| 131. | Quality of Care Through the Patients' Eyes (QUOTE)           | Nijkamp <sup>104</sup>            | 2002 | 562           | care integration            | good                 | good              | not assessed         | not assessed              | good                   | not assessed          | not assessed          | not assessed   |
| 132. | Quality of Care Through the Patients' Eyes (QUOTE)           | van der Eijk <sup>105</sup>       | 1998 | 619           | care integration            | good                 | fair              | not assessed         | excellent                 | not assessed           | not assessed          | good                  | not assessed   |
| 133. | Quality of Care Through the Patients' Eyes (QUOTE)           | van Campen <sup>106</sup>         | 2001 | 618           | care integration            | good                 | not assessed      | not assessed         | excellent                 | good                   | not assessed          | not assessed          | not assessed   |
| 134. | Quality of Dying and Death (QODD)                            | Curtis, J. R. <sup>107</sup>      | 2002 | 96            | care integration            | excellent            | not assessed      | not assessed         | not assessed              | excellent              | poor                  | not assessed          | not assessed   |
| 135. | Quality of Psychiatric Care                                  | Schroder, A. <sup>108</sup>       | 2010 | 313           | care integration            | good                 | not assessed      | not assessed         | not assessed              | good                   | good                  | not assessed          | not assessed   |
| 136. | Safety Net Medical Home Scale (SNMHS)                        | Birnberg, J. M. <sup>109</sup>    | 2011 | 50            | care integration            | poor                 | not assessed      | not assessed         | excellent                 | poor                   | not assessed          | not assessed          | not assessed   |
| 137. | Service Quality Questionnaire                                | Tomes <sup>110</sup>              | 1995 | 613           | care integration            | fair                 | not assessed      | not assessed         | excellent                 | fair                   | not assessed          | not assessed          | not assessed   |
| 138. | SERVQUAL                                                     | Babakus, E. <sup>111</sup>        | 1992 | 20            | care integration            | fair                 | poor              | poor                 | fair                      | fair                   | fair                  | not assessed          | not assessed   |
| 139. | SERVQUAL                                                     | Vandamme <sup>112</sup>           | 1993 | 621           | care integration            | fair                 | not assessed      | not assessed         | good                      | excellent              | good                  | not assessed          | not assessed   |
| 140. | Unnamed 23                                                   | Wei, X. <sup>113</sup>            | 2008 | 384           | care integration            | excellent            | not assessed      | not assessed         | fair                      | good                   | good                  | not assessed          | not assessed   |

|      | Index Instrument<br>(209 index instruments from 379 studies) | Reference Study<br>(300 articles) | Year | Study<br>Code | Construct<br>classification | Internal consistency | Reliability score | Measurement<br>error | Content validity<br>score | Structural<br>validity | Hypothesis<br>testing | Criterion<br>validity | Responsiveness |
|------|--------------------------------------------------------------|-----------------------------------|------|---------------|-----------------------------|----------------------|-------------------|----------------------|---------------------------|------------------------|-----------------------|-----------------------|----------------|
| 141. | Unnamed 25                                                   | de Kok <sup>114</sup>             | 2007 | 448           | care integration            | not assessed         | not assessed      | not assessed         | excellent                 | not assessed           | not assessed          | not assessed          | not assessed   |
| 142. | Unnamed 35                                                   | Wressle <sup>115</sup>            | 2008 | 630           | care integration            | good                 | not assessed      | not assessed         | excellent                 | good                   | not assessed          | not assessed          | not assessed   |
| 143. | Unnamed 40                                                   | Haddad <sup>116</sup>             | 2000 | 475           | care integration            | good                 | not assessed      | not assessed         | excellent                 | good                   | good                  | good                  | not assessed   |
| 144. | 4-point Ordinal Alliance Scale (4PAS)                        | Misdrahi <sup>117</sup>           | 2009 | 554           | patient-centered care       | fair                 | not assessed      | not assessed         | not assessed              | fair                   | fair                  | not assessed          | not assessed   |
| 145. | Agnew Relationship Measure                                   | Agnew-Davies <sup>118</sup>       | 1998 | 407           | patient-centered care       | fair                 | not assessed      | poor                 | excellent                 | fair                   | not assessed          | not assessed          | not assessed   |
| 146. | Agnew Relationship Measure                                   | Stiles <sup>119</sup>             | 2002 | 598           | patient-centered care       | fair                 | not assessed      | not assessed         | excellent                 | not assessed           | poor                  | not assessed          | not assessed   |
| 147. | Agnew Relationship Measure                                   | Stiles <sup>119</sup>             | 2002 | 599           | patient-centered care       | fair                 | not assessed      | not assessed         | excellent                 | not assessed           | poor                  | not assessed          | not assessed   |
| 148. | Ambulatory Care Experiences Survey                           | Safran <sup>120</sup>             | 2006 | 576           | patient-centered care       | poor                 | not assessed      | not assessed         | not assessed              | not assessed           | not assessed          | not assessed          | not assessed   |
| 149. | Better Jobs Better Care PCC instrument                       | Sullivan, J. L. <sup>121</sup>    | 2013 | 351           | patient-centered care       | fair                 | not assessed      | not assessed         | good                      | not assessed           | good                  | not assessed          | not assessed   |
| 150. | California Psychotherapy Alliance Scales (CALPAS)            | Gaston <sup>122</sup>             | 1991 | 421           | patient-centered care       | good                 | fair              | not assessed         | not assessed              | good                   | not assessed          | not assessed          | not assessed   |
| 151. | CARES observation tool (COT)                                 | Gaugler, J. E. <sup>123</sup>     | 2013 | 143           | patient-centered care       | poor                 | not assessed      | not assessed         | excellent                 | not assessed           | not assessed          | not assessed          | not assessed   |
| 152. | Caring Assessment Tool (CAT)                                 | Duffy, J. R. <sup>124</sup>       | 2014 | 453           | patient-centered care       | excellent            | not assessed      | not assessed         | excellent                 | excellent              | not assessed          | not assessed          | not assessed   |
| 153. | Caring Assessment Tool (CAT)                                 | Duffy <sup>125</sup>              | 2007 | 109           | patient-centered care       | fair                 | poor              | not assessed         | not assessed              | not assessed           | fair                  | poor                  | not assessed   |
| 154. | Client-Centered Questionnaire                                | de Witte, L. <sup>126</sup>       | 2006 | 101           | patient-centered care       | excellent            | not assessed      | not assessed         | excellent                 | excellent              | not assessed          | not assessed          | not assessed   |
| 155. | Client-Centered Rehabilitation Questionnaire                 | Cott, C. A. <sup>127</sup>        | 2006 | 89            | patient-centered care       | poor                 | fair              | not assessed         | fair                      | poor                   | fair                  | not assessed          | not assessed   |
| 156. | Clinician Support for Patient Activation Measure (CS-PAM)    | Hibbard, J. H. <sup>128</sup>     | 2010 | 171           | patient-centered care       | fair                 | not assessed      | not assessed         | not assessed              | fair                   | not assessed          | not assessed          | not assessed   |
| 157. | CollaboRATE                                                  | Barr, P. J. <sup>129</sup>        | 2014 | 33            | patient-centered care       | not assessed         | fair              | not assessed         | not assessed              | poor                   | not assessed          | poor                  | poor           |
| 158. | CollaboRATE                                                  | Barr, P. J. <sup>129</sup>        | 2014 | 34            | patient-centered care       | not assessed         | fair              | not assessed         | not assessed              | poor                   | not assessed          | poor                  | poor           |
| 159. | CollaboRATE                                                  | Elwyn <sup>130</sup>              | 2013 | 457           | patient-centered care       | not assessed         | not assessed      | not assessed         | excellent                 | not assessed           | not assessed          | not assessed          | not assessed   |
| 160. | Communication Assessment Instrument                          | Winning <sup>131</sup>            | 2013 | 393           | patient-centered care       | fair                 | not assessed      | not assessed         | not assessed              | fair                   | not assessed          | not assessed          | not assessed   |
| 161. | Communication Assessment Instrument                          | Schonwetter <sup>132</sup>        | 2012 | 579           | patient-centered care       | fair                 | not assessed      | not assessed         | not assessed              | poor                   | not assessed          | not assessed          | not assessed   |
| 162. | Communication Assessment Instrument                          | Schonwetter <sup>132</sup>        | 2012 | 580           | patient-centered care       | fair                 | not assessed      | not assessed         | not assessed              | poor                   | not assessed          | not assessed          | not assessed   |
| 163. | Communication Assessment Instrument                          | Wener <sup>133</sup>              | 2011 | 623           | patient-centered care       | not assessed         | not assessed      | not assessed         | good                      | not assessed           | not assessed          | not assessed          | not assessed   |
| 164. | Communication Assessment Instrument                          | Wener <sup>133</sup>              | 2011 | 622           | patient-centered care       | not assessed         | not assessed      | not assessed         | good                      | not assessed           | not assessed          | not assessed          | not assessed   |
| 165. | <b>Components of Primary Care Index (CPCI)</b>               | Beaulieu, M. D. <sup>134</sup>    | 2011 | 39            | patient-centered care       | fair                 | not assessed      | poor                 | excellent                 | fair                   | poor                  | not assessed          | not assessed   |
| 166. | Consultation and Relational Empathy (CARE) measure           | Fung, C. S. <sup>135</sup>        | 2009 | 139           | patient-centered care       | excellent            | not assessed      | not assessed         | excellent                 | excellent              | good                  | not assessed          | not assessed   |
| 167. | Consultation and Relational Empathy (CARE) measure           | Mercer <sup>136</sup>             | 2004 | 550           | patient-centered care       | poor                 | not assessed      | not assessed         | excellent                 | not assessed           | poor                  | not assessed          | not assessed   |
| 168. | Consultation and Relational Empathy (CARE) measure           | Mercer <sup>137</sup>             | 2008 | 551           | patient-centered care       | fair                 | not assessed      | not assessed         | not assessed              | fair                   | fair                  | not assessed          | not assessed   |
| 169. | Consultation and Relational Empathy (CARE) measure           | Mercer <sup>138</sup>             | 2008 | 552           | patient-centered care       | poor                 | not assessed      | not assessed         | not assessed              | excellent              | good                  | not assessed          | not assessed   |
| 170. | Consultation and Relational Empathy (CARE) measure           | Mercer SW <sup>139</sup>          | 2008 | 553           | patient-centered care       | poor                 | good              | not assessed         | not assessed              | good                   | fair                  | not assessed          | not assessed   |
| 171. | Cultural competence assessment instrument                    | Doorenbos <sup>140</sup>          | 2005 | 452           | patient-centered care       | good                 | good              | not assessed         | excellent                 | good                   | good                  | not assessed          | not assessed   |
| 172. | Distrust of the healthcare system (DHS)                      | Katapodi <sup>141</sup>           | 2010 | 514           | patient-centered care       | excellent            | not assessed      | not assessed         | not assessed              | not assessed           | good                  | not assessed          | not assessed   |
| 173. | Doctor-Patient Scale                                         | de Monchy <sup>142</sup>          | 1988 | 449           | patient-centered care       | good                 | not assessed      | not assessed         | excellent                 | poor                   | good                  | not assessed          | not assessed   |
| 174. | Embedded Patient-Centered Care Scale                         | Wilkerson, L. <sup>143</sup>      | 2010 | 392           | patient-centered care       | poor                 | not assessed      | not assessed         | fair                      | not assessed           | fair                  | not assessed          | not assessed   |
| 175. | ENDOCARE questionnaire (ECQ)                                 | Dancet, E. A. <sup>144</sup>      | 2011 | 98            | patient-centered care       | fair                 | not assessed      | not assessed         | fair                      | fair                   | not assessed          | not assessed          | not assessed   |
| 176. | <b>EUROPEP</b>                                               | Beaulieu, M. D. <sup>134</sup>    | 2011 | 41            | patient-centered care       | fair                 | not assessed      | poor                 | excellent                 | fair                   | poor                  | not assessed          | not assessed   |
| 177. | Facilitation of Patient Involvement Scale (FPI)              | Martin <sup>145</sup>             | 2001 | 534           | patient-centered care       | poor                 | not assessed      | not assessed         | excellent                 | not assessed           | fair                  | not assessed          | not assessed   |
| 178. | Facilitation of Patient Involvement Scale (FPI)              | Martin <sup>145</sup>             | 2001 | 535           | patient-centered care       | poor                 | not assessed      | not assessed         | excellent                 | not assessed           | fair                  | not assessed          | not assessed   |
| 179. | Facilitation of Patient Involvement Scale (FPI)              | Martin <sup>145</sup>             | 2001 | 536           | patient-centered care       | poor                 | poor              | not assessed         | excellent                 | not assessed           | fair                  | not assessed          | not assessed   |
| 180. | Facilitation of Patient Involvement Scale (FPI)              | Martin <sup>145</sup>             | 2001 | 537           | patient-centered care       | poor                 | poor              | not assessed         | excellent                 | not assessed           | fair                  | not assessed          | not assessed   |
| 181. | Family Assessment of Treatment at End of Life                | Casarett <sup>146</sup>           | 2008 | 435           | patient-centered care       | good                 | not assessed      | not assessed         | excellent                 | excellent              | good                  | good                  | not assessed   |
| 182. | Family perceived involvement (F-INVOLVE)                     | Reid <sup>147</sup>               | 2007 | 570           | patient-centered care       | fair                 | fair              | not assessed         | good                      | fair                   | fair                  | not assessed          | not assessed   |
| 183. | Four Habits Coding Scheme (4HCS)                             | Clayton, M. F. <sup>148</sup>     | 2011 | 82            | patient-centered care       | not assessed         | fair              | not assessed         | not assessed              | poor                   | not assessed          | not assessed          | not assessed   |
| 184. | Four Habits Coding Scheme (4HCS)                             | Krupat <sup>149</sup>             | 2006 | 521           | patient-centered care       | poor                 | fair              | not assessed         | not assessed              | not assessed           | fair                  | not assessed          | not assessed   |
| 185. | Giving Youth a Voice questionnaire (GYV)                     | Gan, C. <sup>150</sup>            | 2008 | 142           | patient-centered care       | poor                 | fair              | not assessed         | excellent                 | not assessed           | fair                  | not assessed          | not assessed   |
| 186. | Group-Based Medical Mistrust Scale (GBMMS)                   | Thompson <sup>151</sup>           | 2004 | 612           | patient-centered care       | fair                 | not assessed      | not assessed         | not assessed              | fair                   | fair                  | not assessed          | not assessed   |
| 187. | Health Care Climate Questionnaire (HCCQ)                     | Fiscella <sup>152</sup>           | 2007 | 459           | patient-centered care       | good                 | not assessed      | not assessed         | excellent                 | not assessed           | good                  | not assessed          | not assessed   |
| 188. | Health Care Communication Questionnaire (HCCQ)               | Gremigni, P. <sup>153</sup>       | 2008 | 150           | patient-centered care       | fair                 | not assessed      | poor                 | excellent                 | fair                   | fair                  | not assessed          | not assessed   |
| 189. | Health Care relationship (HCR) Trust Scale                   | Bova <sup>154</sup>               | 2006 | 427           | patient-centered care       | excellent            | good              | not assessed         | excellent                 | excellent              | not assessed          | not assessed          | not assessed   |
| 190. | Health Care System Distrust Scale                            | Rose <sup>155</sup>               | 2004 | 575           | patient-centered care       | excellent            | not assessed      | not assessed         | excellent                 | excellent              | good                  | good                  | not assessed   |
| 191. | Helping Alliance Questionnaire (HAQ)                         | De Weert-Van Oene <sup>156</sup>  | 1999 | 450           | patient-centered care       | good                 | not assessed      | not assessed         | excellent                 | good                   | good                  | not assessed          | not assessed   |
| 192. | Individualized Care Instrument (ICI)                         | Charalambous, A. <sup>157</sup>   | 2012 | 73            | patient-centered care       | poor                 | not assessed      | not assessed         | not assessed              | poor                   | poor                  | not assessed          | not assessed   |
| 193. | Individualized Care Scale (ICS)                              | Charalambous, A. <sup>157</sup>   | 2012 | 74            | patient-centered care       | poor                 | not assessed      | not assessed         | not assessed              | poor                   | poor                  | not assessed          | not assessed   |
| 194. | Individualized Care Scale (ICS)                              | Petroz, U. <sup>158</sup>         | 2011 | 284           | patient-centered care       | fair                 | not assessed      | not assessed         | not assessed              | fair                   | fair                  | not assessed          | not assessed   |
| 195. | Individualized Care Scale (ICS)                              | Suhonen, R. <sup>159</sup>        | 2010 | 348           | patient-centered care       | good                 | not assessed      | not assessed         | excellent                 | fair                   | fair                  | not assessed          | not assessed   |
| 196. | Individualized Care Scale (ICS)                              | Suhonen, R. <sup>160</sup>        | 2000 | 350           | patient-centered care       | fair                 | fair              | not assessed         | excellent                 | fair                   | fair                  | not assessed          | not assessed   |
| 197. | Individualized Care Scale (ICS)                              | Suhonen <sup>161</sup>            | 2010 | 602           | patient-centered care       | good                 | not assessed      | not assessed         | not assessed              | good                   | not assessed          | not assessed          | not assessed   |
| 198. | Individualized Care Scale (ICS)                              | Suhonen <sup>161</sup>            | 2010 | 603           | patient-centered care       | good                 | not assessed      | not assessed         | not assessed              | good                   | not assessed          | not assessed          | not assessed   |
| 199. | Individualized Care Scale (ICS)                              | Suhonen <sup>161</sup>            | 2010 | 604           | patient-centered care       | good                 | not assessed      | not assessed         | not assessed              | good                   | not assessed          | not assessed          | not assessed   |
| 200. | Individualized Care Scale (ICS)                              | Suhonen <sup>161</sup>            | 2010 | 605           | patient-centered care       | good                 | not assessed      | not assessed         | not assessed              | good                   | not assessed          | not assessed          | not assessed   |
| 201. | Individualized Care Scale (ICS)                              | Suhonen <sup>161</sup>            | 2010 | 606           | patient-centered care       | fair                 | not assessed      | not assessed         | not assessed              | poor                   | not assessed          | not assessed          | not assessed   |
| 202. | Inpatient-Treatment Alliance Scale (ITAS)                    | Blais <sup>162</sup>              | 2004 | 425           | patient-centered care       | fair                 | fair              | not assessed         | excellent                 | fair                   | not assessed          | not assessed          | not assessed   |
| 203. | Interpersonal Processes of Care version (IPC-II)             | Beaulieu, M. D. <sup>134</sup>    | 2011 | 40            | patient-centered care       | fair                 | not assessed      | poor                 | excellent                 | fair                   | poor                  | not assessed          | not assessed   |
| 204. | Jefferson Scale of Physician Empathy                         | Hojat <sup>163</sup>              | 2001 | 508           | patient-centered care       | good                 | not assessed      | not assessed         | excellent                 | good                   | good                  | good                  | not assessed   |
| 205. | Learners' Perceptions Survey—Primary Care (LPS-PC)           | Byrne, J. M. <sup>164</sup>       | 2013 | 66            | patient-centered care       | not assessed         | not assessed      | not assessed         | excellent                 | poor                   | not assessed          | not assessed          | not assessed   |
| 206. | Matched-pair instrument                                      | Campbell <sup>165</sup>           | 2007 | 434           | patient-centered care       | good                 | not assessed      | poor                 | excellent                 | good                   | not assessed          | not assessed          | not assessed   |
| 207. | Measure of Patient-Centered Communication (MPCC)             | Clayton, M. F. <sup>148</sup>     | 2011 | 81            | patient-centered care       | not assessed         | fair              | not assessed         | not assessed              | poor                   | not assessed          | not assessed          | not assessed   |
| 208. | Measure of Processes of Care (MPOC)                          | Woodside <sup>166</sup>           | 2001 | 629           | patient-centered care       | good                 | good              | not assessed         | excellent                 | good                   | good                  | not assessed          | not assessed   |
| 209. | Measure of Trust in Insurers                                 | Goold <sup>167</sup>              | 2006 | 469           | patient-centered care       | good                 | not assessed      | not assessed         | excellent                 | good                   | good                  | not assessed          | not assessed   |

|      | Index Instrument<br>(209 index instruments from 379 studies)                         | Reference Study<br>(300 articles)     | Year | Study<br>Code | Construct<br>classification | Internal consistency | Reliability score | Measurement<br>error | Content validity<br>score | Structural<br>validity | Hypothesis<br>testing | Criterion<br>validity | Responsiveness |
|------|--------------------------------------------------------------------------------------|---------------------------------------|------|---------------|-----------------------------|----------------------|-------------------|----------------------|---------------------------|------------------------|-----------------------|-----------------------|----------------|
| 210. | Measuring instrument for individualized care                                         | Chappell <sup>168</sup>               | 2007 | 438           | patient-centered care       | poor                 | fair              | not assessed         | excellent                 | poor                   | good                  | not assessed          | not assessed   |
| 211. | Medical Communication Competence Scale                                               | Cegala <sup>169</sup>                 | 1998 | 437           | patient-centered care       | good                 | not assessed      | not assessed         | excellent                 | good                   | not assessed          | not assessed          | not assessed   |
| 212. | Multi-country Survey Study Responsiveness Questionnaire                              | Valentine, N. B. <sup>170</sup>       | 2007 | 369           | patient-centered care       | excellent            | good              | not assessed         | excellent                 | excellent              | good                  | not assessed          | not assessed   |
| 213. | Observing patient involvement scale (OPTION)                                         | Elwyn, G. <sup>171</sup>              | 2003 | 121           | patient-centered care       | good                 | fair              | not assessed         | excellent                 | good                   | good                  | not assessed          | not assessed   |
| 214. | Oncology Patients' Perception of the Quality of Nursing Care                         | Radwin, L. <sup>172</sup>             | 2003 | 291           | patient-centered care       | fair                 | not assessed      | not assessed         | poor                      | fair                   | not assessed          | not assessed          | not assessed   |
| 215. | OutPatient Experiences Questionnaire (OPEQ)                                          | Garratt <sup>173</sup>                | 2005 | 465           | patient-centered care       | excellent            | good              | not assessed         | excellent                 | excellent              | excellent             | not assessed          | not assessed   |
| 216. | Pain Care Quality (PainCQ)                                                           | Beck <sup>174</sup>                   | 2010 | 423           | patient-centered care       | not assessed         | not assessed      | not assessed         | excellent                 | not assessed           | not assessed          | not assessed          | not assessed   |
| 217. | Pain Care Quality (PainCQ)                                                           | Beck <sup>175</sup>                   | 2010 | 424           | patient-centered care       | good                 | not assessed      | poor                 | excellent                 | good                   | not assessed          | not assessed          | not assessed   |
| 218. | Patient Activation Measure (PAM)                                                     | Fowles, J. B. <sup>176</sup>          | 2009 | 134           | patient-centered care       | good                 | poor              | poor                 | not assessed              | not assessed           | fair                  | not assessed          | not assessed   |
| 219. | Patient Activation Measure (PAM)                                                     | Skolasky, R. L. <sup>177</sup>        | 2011 | 332           | patient-centered care       | poor                 | not assessed      | not assessed         | not assessed              | poor                   | good                  | not assessed          | not assessed   |
| 220. | Patient Activation Measure (PAM)                                                     | Hibbard <sup>178</sup>                | 2005 | 505           | patient-centered care       | good                 | not assessed      | poor                 | not assessed              | good                   | not assessed          | poor                  | not assessed   |
| 221. | Patient Activation Measure (PAM)                                                     | Hibbard <sup>179</sup>                | 2004 | 506           | patient-centered care       | good                 | not assessed      | good                 | excellent                 | good                   | good                  | good                  | not assessed   |
| 222. | Patient Perception of Patient-Centeredness Questionnaire (PPPCQ)                     | Constand, M. K. <sup>180</sup>        | 2014 | 85            | patient-centered care       | poor                 | poor              | not assessed         | not assessed              | fair                   | fair                  | fair                  | fair           |
| 223. | Patient Reactions Assessment                                                         | Galassi <sup>181</sup>                | 1992 | 462           | patient-centered care       | good                 | not assessed      | not assessed         | excellent                 | good                   | good                  | not assessed          | not assessed   |
| 224. | Patient Responses to Nursing Behaviors (PRNB)                                        | Kemppainen, J. <sup>182</sup>         | 1999 | 212           | patient-centered care       | good                 | not assessed      | not assessed         | excellent                 | fair                   | fair                  | not assessed          | not assessed   |
| 225. | Patient trust in community pharmacists (TRUST-Ph)                                    | Ngorsuraches <sup>183</sup>           | 2008 | 559           | patient-centered care       | good                 | not assessed      | not assessed         | excellent                 | good                   | not assessed          | not assessed          | not assessed   |
| 226. | Patient trust in community pharmacists (TRUST-Ph)                                    | Ngorsuraches <sup>183</sup>           | 2008 | 560           | patient-centered care       | good                 | not assessed      | not assessed         | excellent                 | good                   | good                  | not assessed          | not assessed   |
| 227. | Patient-centered care competency (PCC)                                               | Hwang, J. I. <sup>184</sup>           | 2013 | 198           | patient-centered care       | excellent            | poor              | not assessed         | fair                      | excellent              | not assessed          | not assessed          | not assessed   |
| 228. | Patient-centered family-focused care (PCFFC)                                         | Hannum Rose, J. <sup>185</sup>        | 2007 | 164           | patient-centered care       | excellent            | not assessed      | poor                 | excellent                 | excellent              | not assessed          | not assessed          | not assessed   |
| 229. | Patient-centered instrument for assessment of quality of breast cancer care          | de Kok, M. <sup>186</sup>             | 2010 | 99            | patient-centered care       | fair                 | not assessed      | not assessed         | fair                      | fair                   | not assessed          | not assessed          | not assessed   |
| 230. | Patient-Centered Observation Form (PCOF)                                             | Chesser, A. <sup>187</sup>            | 2013 | 76            | patient-centered care       | poor                 | not assessed      | not assessed         | not assessed              | not assessed           | not assessed          | not assessed          | not assessed   |
| 231. | Patient-centered questionnaire (PCQ)                                                 | Pedro, J. <sup>188</sup>              | 2013 | 283           | patient-centered care       | excellent            | not assessed      | not assessed         | not assessed              | good                   | good                  | not assessed          | not assessed   |
| 232. | Patient-centered questionnaire (PCQ)                                                 | van der Eijk, M. <sup>189</sup>       | 2012 | 371           | patient-centered care       | fair                 | not assessed      | not assessed         | excellent                 | fair                   | not assessed          | not assessed          | not assessed   |
| 233. | Patient-centered questionnaire (PCQ)                                                 | van Empel, I. W. <sup>190</sup>       | 2010 | 372           | patient-centered care       | poor                 | fair              | not assessed         | excellent                 | not assessed           | fair                  | not assessed          | not assessed   |
| 234. | Patient-centered score sheet                                                         | Henbest <sup>191</sup>                | 1989 | 502           | patient-centered care       | not assessed         | poor              | not assessed         | not assessed              | not assessed           | not assessed          | good                  | good           |
| 235. | Patient-Centeredness Multi-Choice Questionnaire x (PMQX)                             | Rolfe <sup>192</sup>                  | 1993 | 574           | patient-centered care       | not assessed         | fair              | not assessed         | not assessed              | not assessed           | fair                  | not assessed          | not assessed   |
| 236. | Patient-Doctor Depth of Relationship Scale                                           | Ridd <sup>193</sup>                   | 2011 | 571           | patient-centered care       | fair                 | fair              | not assessed         | good                      | fair                   | fair                  | not assessed          | not assessed   |
| 237. | Patient-Doctor Relationship Questionnaire                                            | Mingote Adan, J. <sup>194</sup>       | 2009 | 257           | patient-centered care       | poor                 | not assessed      | not assessed         | not assessed              | fair                   | not assessed          | fair                  | not assessed   |
| 238. | Patient-Doctor Relationship Questionnaire                                            | Van der Feltz-Cornelis <sup>195</sup> | 2004 | 620           | patient-centered care       | good                 | good              | not assessed         | excellent                 | good                   | not assessed          | not assessed          | not assessed   |
| 239. | Patient-relevant hierarchy of needs                                                  | Juhnke, C. <sup>196</sup>             | 2013 | 207           | patient-centered care       | poor                 | not assessed      | not assessed         | fair                      | fair                   | not assessed          | not assessed          | not assessed   |
| 240. | Patient-reported Interpersonal Processes of Care                                     | Stewart, A. L. <sup>197</sup>         | 2007 | 342           | patient-centered care       | excellent            | not assessed      | not assessed         | good                      | excellent              | good                  | not assessed          | not assessed   |
| 241. | Pediatric Patient-Family-Centered Care Benchmarking Survey                           | Carmen, S. <sup>198</sup>             | 2008 | 70            | patient-centered care       | fair                 | not assessed      | not assessed         | excellent                 | fair                   | not assessed          | not assessed          | not assessed   |
| 242. | Pediatric Trust in Physician Scale (Pedi-TiPS)                                       | Moseley <sup>199</sup>                | 2006 | 556           | patient-centered care       | poor                 | not assessed      | not assessed         | not assessed              | not assessed           | good                  | not assessed          | not assessed   |
| 243. | Perceived Involvement in Care Scale                                                  | Smith <sup>200</sup>                  | 2006 | 593           | patient-centered care       | fair                 | not assessed      | not assessed         | not assessed              | fair                   | fair                  | not assessed          | not assessed   |
| 244. | Perceptions of Involvement in Care Scale                                             | Lerman <sup>201</sup>                 | 1990 | 527           | patient-centered care       | fair                 | not assessed      | not assessed         | not assessed              | fair                   | fair                  | not assessed          | not assessed   |
| 245. | Person-centered Care Assessment Tool (P-CAT)                                         | Rokstad, A. M. <sup>202</sup>         | 2012 | 296           | patient-centered care       | fair                 | fair              | not assessed         | not assessed              | fair                   | fair                  | not assessed          | not assessed   |
| 246. | Person-centered Care Assessment Tool (P-CAT)                                         | Edvardsson <sup>203</sup>             | 2010 | 454           | patient-centered care       | excellent            | good              | not assessed         | excellent                 | excellent              | not assessed          | not assessed          | not assessed   |
| 247. | Person-centered Care Assessment Tool (P-CAT)                                         | Sjogren, K. <sup>204</sup>            | 2012 | 331           | patient-centered care       | poor                 | good              | not assessed         | good                      | good                   | not assessed          | not assessed          | not assessed   |
| 248. | Person-centered care of Older People with Cognitive Impairment in Acute Care (POPAC) | Nilsson, A. <sup>205</sup>            | 2013 | 266           | patient-centered care       | fair                 | fair              | not assessed         | fair                      | fair                   | not assessed          | not assessed          | not assessed   |
| 249. | Person-centered care of Older People with Cognitive Impairment in Acute Care (POPAC) | Edvardsson, D. <sup>206</sup>         | 2013 | 115           | patient-centered care       | fair                 | poor              | not assessed         | fair                      | fair                   | not assessed          | not assessed          | not assessed   |
| 250. | Person-centered Climate Questionnaire (PCCQ)                                         | Bergland, A. <sup>207</sup>           | 2012 | 47            | patient-centered care       | good                 | good              | not assessed         | excellent                 | good                   | not assessed          | not assessed          | not assessed   |
| 251. | Person-centered Climate Questionnaire (PCCQ)                                         | Edvardsson, D. <sup>208</sup>         | 2009 | 113           | patient-centered care       | fair                 | fair              | not assessed         | excellent                 | fair                   | not assessed          | not assessed          | not assessed   |
| 252. | Person-centered Climate Questionnaire (PCCQ)                                         | Edvardsson, D. <sup>209</sup>         | 2010 | 114           | patient-centered care       | fair                 | fair              | not assessed         | excellent                 | fair                   | not assessed          | not assessed          | not assessed   |
| 253. | Person-centered Climate Questionnaire (PCCQ)                                         | Edvardsson <sup>210</sup>             | 2008 | 116           | patient-centered care       | good                 | fair              | not assessed         | excellent                 | good                   | not assessed          | not assessed          | not assessed   |
| 254. | Person-centered Climate Questionnaire (PCCQ)                                         | Edvardsson <sup>211</sup>             | 2009 | 117           | patient-centered care       | good                 | fair              | not assessed         | excellent                 | good                   | not assessed          | not assessed          | not assessed   |
| 255. | Person-Centered Health Care for Older Adults Survey                                  | Dow, B. <sup>212</sup>                | 2013 | 108           | patient-centered care       | excellent            | not assessed      | not assessed         | excellent                 | excellent              | not assessed          | not assessed          | not assessed   |
| 256. | Person-directed Care (PDC)                                                           | White, D. L. <sup>213</sup>           | 2008 | 389           | patient-centered care       | good                 | not assessed      | not assessed         | excellent                 | good                   | good                  | not assessed          | not assessed   |
| 257. | Pharmacy Service Orientation Measure                                                 | Clark, B. E. <sup>214</sup>           | 2006 | 78            | patient-centered care       | poor                 | not assessed      | not assessed         | not assessed              | not assessed           | not assessed          | not assessed          | not assessed   |
| 258. | Picker Commonwealth Patient Centered Care Questionnaire                              | Ryan, M. E. <sup>215</sup>            | 1995 | 301           | patient-centered care       | not assessed         | poor              | not assessed         | fair                      | not assessed           | not assessed          | not assessed          | not assessed   |
| 259. | <b>Primary Care Assessment Survey (PCAS)</b>                                         | Beaulieu, M. D. <sup>134</sup>        | 2011 | 38            | patient-centered care       | fair                 | not assessed      | poor                 | excellent                 | fair                   | poor                  | not assessed          | not assessed   |
| 260. | Quality from Patient's Perspective                                                   | Wilde <sup>216</sup>                  | 1994 | 625           | patient-centered care       | good                 | not assessed      | not assessed         | excellent                 | good                   | not assessed          | not assessed          | not assessed   |
| 261. | Quality from Patient's Perspective                                                   | Wilde <sup>216</sup>                  | 1994 | 626           | patient-centered care       | good                 | not assessed      | not assessed         | excellent                 | good                   | not assessed          | not assessed          | not assessed   |
| 262. | Quality of Care Through the Patients' Eyes (QUOTE)                                   | van Weert, J. C. <sup>217</sup>       | 2009 | 374           | patient-centered care       | excellent            | not assessed      | not assessed         | fair                      | good                   | good                  | not assessed          | not assessed   |
| 263. | Quality of Care Through the Patients' Eyes (QUOTE)                                   | van Weert, J. C. <sup>217</sup>       | 2009 | 375           | patient-centered care       | excellent            | not assessed      | not assessed         | fair                      | good                   | good                  | not assessed          | not assessed   |
| 264. | Quality of End-of-life care and Satisfaction with Treatment (QUEST)                  | Sulmasy <sup>218</sup>                | 2002 | 607           | patient-centered care       | poor                 | fair              | not assessed         | good                      | not assessed           | fair                  | not assessed          | not assessed   |
| 265. | Quality of end-of-life communication (QOC)                                           | Engelberg <sup>219</sup>              | 2006 | 458           | patient-centered care       | excellent            | not assessed      | not assessed         | excellent                 | excellent              | good                  | not assessed          | not assessed   |
| 266. | Quality of Family Experience (QUAL-E FAM)                                            | Steinhauser, K. E. <sup>220</sup>     | 2014 | 339           | patient-centered care       | fair                 | fair              | not assessed         | excellent                 | fair                   | poor                  | not assessed          | not assessed   |
| 267. | Race-based Medical Mistrust                                                          | Shelton <sup>221</sup>                | 2010 | 588           | patient-centered care       | good                 | not assessed      | not assessed         | not assessed              | good                   | good                  | not assessed          | not assessed   |
| 268. | Relational Communication Scale                                                       | Gallagher <sup>222</sup>              | 2001 | 464           | patient-centered care       | poor                 | not assessed      | not assessed         | not assessed              | poor                   | poor                  | not assessed          | not assessed   |
| 269. | Relational communication scale for observational measurement (RCS-O)                 | Gallagher, T. J. <sup>223</sup>       | 2005 | 140           | patient-centered care       | fair                 | fair              | not assessed         | not assessed              | fair                   | poor                  | not assessed          | not assessed   |
| 270. | Revised Health Care System Distrust Scale                                            | Shea <sup>224</sup>                   | 2008 | 585           | patient-centered care       | fair                 | not assessed      | not assessed         | excellent                 | fair                   | fair                  | not assessed          | not assessed   |
| 271. | Rochester Participatory Decision-Making Scale (RPAD)                                 | Shields <sup>225</sup>                | 2005 | 590           | patient-centered care       | not assessed         | good              | not assessed         | not assessed              | not assessed           | good                  | not assessed          | not assessed   |
| 272. | Scale To Assess Therapeutic Relationships in Community Mental                        | McGuire-Snieckus <sup>226</sup>       | 2007 | 544           | patient-centered care       | not assessed         | not assessed      | not assessed         | not assessed              | fair                   | fair                  | not assessed          | not assessed   |

|      | <b>Index Instrument<br/>(209 index instruments from 379 studies)</b>             | <b>Reference Study<br/>(300 articles)</b> | <b>Year</b> | <b>Study Code</b> | <b>Construct classification</b> | <b>Internal consistency</b> | <b>Reliability score</b> | <b>Measurement error</b> | <b>Content validity score</b> | <b>Structural validity</b> | <b>Hypothesis testing</b> | <b>Criterion validity</b> | <b>Responsiveness</b> |
|------|----------------------------------------------------------------------------------|-------------------------------------------|-------------|-------------------|---------------------------------|-----------------------------|--------------------------|--------------------------|-------------------------------|----------------------------|---------------------------|---------------------------|-----------------------|
|      | Health Care (STAR)                                                               |                                           |             |                   |                                 |                             |                          |                          |                               |                            |                           |                           |                       |
| 273. | Scale To Assess Therapeutic Relationships in Community Mental Health Care (STAR) | McGuire-Snieckus <sup>226</sup>           | 2007        | 543               | patient-centered care           | not assessed                | not assessed             | not assessed             | not assessed                  | fair                       | fair                      | not assessed              | not assessed          |
| 274. | Survivor Unmet Needs Survey (SUNS)                                               | Campbell, H. S. <sup>227</sup>            | 2014        | 68                | patient-centered care           | good                        | not assessed             | not assessed             | not assessed                  | excellent                  | not assessed              | excellent                 | not assessed          |
| 275. | Survivor Unmet Needs Survey (SUNS)                                               | Campbell, H. S. <sup>228</sup>            | 2010        | 69                | patient-centered care           | good                        | good                     | not assessed             | excellent                     | good                       | not assessed              | not assessed              | not assessed          |
| 276. | Survivor Unmet Needs Survey (SUNS)                                               | Hodgkinson, K. <sup>229</sup>             | 2007        | 176               | patient-centered care           | fair                        | fair                     | not assessed             | fair                          | fair                       | fair                      | not assessed              | not assessed          |
| 277. | Survivor Unmet Needs Survey (SUNS)                                               | Hodgkinson, K. <sup>230</sup>             | 2007        | 177               | patient-centered care           | fair                        | fair                     | not assessed             | fair                          | fair                       | fair                      | not assessed              | not assessed          |
| 278. | Systematic Culture Inquiry On Patient safety in primary care (SCOPE)             | Zwart, D. L. <sup>231</sup>               | 2011        | 405               | patient-centered care           | excellent                   | not assessed             | not assessed             | excellent                     | excellent                  | good                      | not assessed              | not assessed          |
| 279. | The Human Connection Scale                                                       | Mack <sup>232</sup>                       | 2009        | 532               | patient-centered care           | fair                        | not assessed             | not assessed             | not assessed                  | fair                       | fair                      | not assessed              | not assessed          |
| 280. | Therapy Alliance Scale                                                           | Pinsof, W. M. <sup>233</sup>              | 2008        | 289               | patient-centered care           | good                        | not assessed             | not assessed             | not assessed                  | good                       | good                      | not assessed              | not assessed          |
| 281. | Therapy Alliance Scale                                                           | Pinsof, W. M. <sup>233</sup>              | 2008        | 290               | patient-centered care           | good                        | not assessed             | not assessed             | not assessed                  | good                       | good                      | not assessed              | not assessed          |
| 282. | Therapy Alliance Scale                                                           | Pinsof, W. M. <sup>233</sup>              | 2008        | 288               | patient-centered care           | fair                        | not assessed             | not assessed             | not assessed                  | good                       | good                      | not assessed              | not assessed          |
| 283. | Trust in Nurses Scale                                                            | Radwin <sup>234</sup>                     | 2010        | 567               | patient-centered care           | fair                        | not assessed             | not assessed             | not assessed                  | fair                       | not assessed              | not assessed              | not assessed          |
| 284. | Trust in Nurses Scale                                                            | Radwin <sup>234</sup>                     | 2010        | 568               | patient-centered care           | fair                        | not assessed             | not assessed             | not assessed                  | fair                       | not assessed              | not assessed              | not assessed          |
| 285. | Trust in Nurses Scale                                                            | Radwin <sup>235</sup>                     | 2005        | 569               | patient-centered care           | fair                        | not assessed             | not assessed             | good                          | not assessed               | fair                      | not assessed              | not assessed          |
| 286. | Trust in Oncologist Scale (TiOS)                                                 | Hillen <sup>236</sup>                     | 2012        | 507               | patient-centered care           | excellent                   | good                     | not assessed             | excellent                     | excellent                  | not assessed              | not assessed              | not assessed          |
| 287. | Trust in Physicians Scale                                                        | Anderson <sup>237</sup>                   | 1990        | 409               | patient-centered care           | good                        | not assessed             | not assessed             | excellent                     | poor                       | poor                      | not assessed              | not assessed          |
| 288. | Trust in Physicians Scale                                                        | Freburger <sup>238</sup>                  | 2003        | 461               | patient-centered care           | excellent                   | not assessed             | not assessed             | excellent                     | excellent                  | good                      | not assessed              | not assessed          |
| 289. | Trust in Physicians Scale                                                        | Thom <sup>239</sup>                       | 1999        | 610               | patient-centered care           | poor                        | fair                     | not assessed             | not assessed                  | not assessed               | fair                      | not assessed              | not assessed          |
| 290. | Trust in the Medical Profession                                                  | Hall <sup>240</sup>                       | 2002        | 489               | patient-centered care           | excellent                   | not assessed             | not assessed             | excellent                     | excellent                  | good                      | not assessed              | not assessed          |
| 291. | Tucker Culturally Sensitive Healthcare Inventory (T-CUSHCI)                      | Tucker, C. M. <sup>241</sup>              | 2010        | 361               | patient-centered care           | poor                        | fair                     | not assessed             | not assessed                  | not assessed               | not assessed              | not assessed              | not assessed          |
| 292. | Tucker Culturally Sensitive Healthcare Inventory (T-CUSHCI)                      | Tucker, C. M. <sup>241</sup>              | 2007        | 362               | patient-centered care           | poor                        | fair                     | not assessed             | not assessed                  | not assessed               | not assessed              | not assessed              | not assessed          |
| 293. | Tucker Culturally Sensitive Healthcare Inventory (T-CUSHCI)                      | Mirsu-Paun, A. <sup>242</sup>             | 2007        | 259               | patient-centered care           | poor                        | not assessed             | not assessed             | fair                          | poor                       | poor                      | not assessed              | not assessed          |
| 294. | Unnamed 1                                                                        | Adams, R. <sup>243</sup>                  | 2012        | 5                 | patient-centered care           | not assessed                | not assessed             | not assessed             | fair                          | fair                       | poor                      | not assessed              | not assessed          |
| 295. | Unnamed 15                                                                       | Ouwens, M. <sup>244</sup>                 | 2010        | 275               | patient-centered care           | poor                        | not assessed             | not assessed             | fair                          | not assessed               | not assessed              | not assessed              | poor                  |
| 296. | Unnamed 17                                                                       | Shields, L. <sup>245</sup>                | 2004        | 325               | patient-centered care           | poor                        | fair                     | not assessed             | fair                          | poor                       | not assessed              | poor                      | not assessed          |
| 297. | Unnamed 18                                                                       | Sidani, S. <sup>246</sup>                 | 2008        | 328               | patient-centered care           | poor                        | not assessed             | not assessed             | not assessed                  | not assessed               | fair                      | not assessed              | not assessed          |
| 298. | Unnamed 19                                                                       | Sidani, S. <sup>246</sup>                 | 2008        | 329               | patient-centered care           | poor                        | not assessed             | not assessed             | not assessed                  | not assessed               | fair                      | not assessed              | not assessed          |
| 299. | Unnamed 20                                                                       | Straten, G. F. <sup>247</sup>             | 2002        | 345               | patient-centered care           | fair                        | not assessed             | not assessed             | not assessed                  | fair                       | fair                      | not assessed              | not assessed          |
| 300. | Unnamed 22                                                                       | Van den Broeck <sup>248</sup>             | 2012        | 370               | patient-centered care           | fair                        | not assessed             | not assessed             | excellent                     | fair                       | fair                      | not assessed              | not assessed          |
| 301. | Unnamed 27                                                                       | Grol <sup>249</sup>                       | 1990        | 472               | patient-centered care           | fair                        | not assessed             | not assessed             | excellent                     | fair                       | not assessed              | not assessed              | not assessed          |
| 302. | Unnamed 29                                                                       | Kelly <sup>250</sup>                      | 2005        | 515               | patient-centered care           | good                        | good                     | not assessed             | excellent                     | good                       | not assessed              | not assessed              | not assessed          |
| 303. | Unnamed 31                                                                       | Leisen <sup>251</sup>                     | 2001        | 526               | patient-centered care           | fair                        | poor                     | not assessed             | fair                          | fair                       | fair                      | fair                      | not assessed          |
| 304. | Unnamed 33                                                                       | Little <sup>252</sup>                     | 2001        | 529               | patient-centered care           | fair                        | not assessed             | not assessed             | poor                          | fair                       | fair                      | not assessed              | not assessed          |
| 305. | Unnamed 34                                                                       | Thom <sup>253</sup>                       | 2011        | 611               | patient-centered care           | fair                        | fair                     | not assessed             | excellent                     | fair                       | fair                      | not assessed              | not assessed          |
| 306. | Unnamed 37                                                                       | Zhang <sup>254</sup>                      | 2009        | 633               | patient-centered care           | good                        | not assessed             | not assessed             | excellent                     | good                       | good                      | not assessed              | not assessed          |
| 307. | Unnamed 39                                                                       | Saturno <sup>255</sup>                    | 2015        | 640               | patient-centered care           | not assessed                | fair                     | not assessed             | not assessed                  | not assessed               | not assessed              | not assessed              | not assessed          |
| 308. | Unnamed 4                                                                        | Hiidenhovi, H. <sup>256</sup>             | 2001        | 172               | patient-centered care           | poor                        | poor                     | not assessed             | excellent                     | poor                       | not assessed              | not assessed              | not assessed          |
| 309. | Vanderbilt Therapeutic Alliance Scale (VTAS-R)                                   | Shelef <sup>257</sup>                     | 2008        | 586               | patient-centered care           | fair                        | fair                     | not assessed             | not assessed                  | not assessed               | fair                      | poor                      | not assessed          |
| 310. | Vanderbilt Therapeutic Alliance Scale (VTAS-R)                                   | Shelef <sup>257</sup>                     | 2008        | 587               | patient-centered care           | fair                        | fair                     | not assessed             | not assessed                  | not assessed               | fair                      | poor                      | not assessed          |
| 311. | Verona medical interview classification system (VR-MICS)                         | Del Piccolo, L. <sup>258</sup>            | 2005        | 103               | patient-centered care           | not assessed                | fair                     | not assessed             | not assessed                  | poor                       | not assessed              | not assessed              | not assessed          |
| 312. | Verona medical interview classification system (VR-MICS)                         | Del Piccolo, L. <sup>258</sup>            | 2005        | 104               | patient-centered care           | not assessed                | fair                     | not assessed             | not assessed                  | poor                       | not assessed              | not assessed              | not assessed          |
| 313. | Verona medical interview classification system (VR-MICS)                         | Del Piccolo, L. <sup>258</sup>            | 2005        | 105               | patient-centered care           | not assessed                | fair                     | not assessed             | not assessed                  | poor                       | not assessed              | not assessed              | not assessed          |
| 314. | Wake Forest Physician Trust Scale                                                | Bachinger <sup>259</sup>                  | 2009        | 414               | patient-centered care           | excellent                   | not assessed             | not assessed             | excellent                     | excellent                  | good                      | not assessed              | not assessed          |
| 315. | Wake Forest Physician Trust Scale                                                | Hall <sup>260</sup>                       | 2002        | 490               | patient-centered care           | excellent                   | not assessed             | not assessed             | excellent                     | excellent                  | not assessed              | not assessed              | not assessed          |
| 316. | Wake Forest Physician Trust Scale                                                | Hall <sup>260</sup>                       | 2002        | 491               | patient-centered care           | excellent                   | good                     | not assessed             | excellent                     | excellent                  | not assessed              | not assessed              | not assessed          |
| 317. | Working Alliance Inventory (WAI)                                                 | Hatcher <sup>261</sup>                    | 2006        | 494               | patient-centered care           | not assessed                | not assessed             | not assessed             | excellent                     | good                       | good                      | not assessed              | not assessed          |
| 318. | Working Alliance Inventory (WAI)                                                 | Hatcher <sup>261</sup>                    | 2006        | 496               | patient-centered care           | good                        | poor                     | not assessed             | excellent                     | good                       | good                      | not assessed              | not assessed          |
| 319. | Working Alliance Inventory (WAI)                                                 | Hatcher <sup>261</sup>                    | 2006        | 495               | patient-centered care           | not assessed                | not assessed             | not assessed             | excellent                     | good                       | good                      | not assessed              | not assessed          |

### PROFESSIONAL INTEGRATION

|      | <b>Index Instrument</b>                             | <b>Reference Study</b>        | <b>Year</b> | <b>Study Code</b> | <b>Construct classification</b>      | <b>Internal consistency</b> | <b>Reliability score</b> | <b>Measurement error</b> | <b>Content validity score</b> | <b>Structural validity</b> | <b>Hypothesis testing</b> | <b>Criterion validity</b> | <b>Responsiveness</b> |
|------|-----------------------------------------------------|-------------------------------|-------------|-------------------|--------------------------------------|-----------------------------|--------------------------|--------------------------|-------------------------------|----------------------------|---------------------------|---------------------------|-----------------------|
| 320. | <b>Components of Primary Care Index (CPCI)</b>      | Burge <sup>262</sup>          | 2011        | 433               | care continuity / comprehensive care | excellent                   | not assessed             | not assessed             | excellent                     | excellent                  | good                      | not assessed              | not assessed          |
| 321. | Handover Performance Tool (HPT)                     | Pezzolessi, C. <sup>263</sup> | 2013        | 287               | care continuity / comprehensive care | fair                        | fair                     | not assessed             | fair                          | fair                       | fair                      | not assessed              | not assessed          |
| 322. | <b>Primary Care Assessment Survey (PCAS)</b>        | Burge <sup>262</sup>          | 2011        | 431               | care continuity / comprehensive care | excellent                   | not assessed             | not assessed             | excellent                     | excellent                  | good                      | not assessed              | not assessed          |
| 323. | <b>Primary Care Assessment Tool (PCAT)</b>          | Burge <sup>262</sup>          | 2011        | 432               | care continuity / comprehensive care | excellent                   | not assessed             | not assessed             | excellent                     | excellent                  | good                      | not assessed              | not assessed          |
| 324. | Collaboration And Satisfaction About Care Decisions | Baggs <sup>264</sup>          | 1994        | 415               | care coordination / case management  | fair                        | not assessed             | not assessed             | excellent                     | fair                       | fair                      | not assessed              | not assessed          |
| 325. | Team Emergency Assessment Measure (TEAM)            | Cooper <sup>265</sup>         | 2010        | 442               | care coordination / case management  | fair                        | fair                     | not assessed             | excellent                     | fair                       | not assessed              | not assessed              | not assessed          |
| 326. | Unnamed 32                                          | Temkin-Greener <sup>266</sup> | 2004        | 609               | care coordination / case management  | poor                        | not assessed             | not assessed             | excellent                     | not assessed               | good                      | not assessed              | not assessed          |

|      | Index Instrument                                                       | Reference Study               | Year | Study Code | Construct classification | Internal consistency | Reliability score | Measurement error | Content validity score | Structural validity | Hypothesis testing | Criterion validity | Responsiveness |
|------|------------------------------------------------------------------------|-------------------------------|------|------------|--------------------------|----------------------|-------------------|-------------------|------------------------|---------------------|--------------------|--------------------|----------------|
| 327. | Consumer Quality Index (CQI)                                           | Damman, O. <sup>267</sup>     | 2009 | 97         | care integration         | excellent            | not assessed      | not assessed      | excellent              | not assessed        | not assessed       | not assessed       | not assessed   |
| 328. | Primary Care Behavioral Health Provider Adherence Questionnaire (PPAQ) | Beehler, G. P. <sup>268</sup> | 2013 | 42         | care integration         | poor                 | not assessed      | not assessed      | excellent              | poor                | fair               | fair               | not assessed   |
| 329. | Unnamed 14                                                             | Nuno-Solinis, <sup>269</sup>  | 2013 | 269        | care integration         | fair                 | not assessed      | not assessed      | fair                   | fair                | not assessed       | not assessed       | not assessed   |
| 330. | California Psychotherapy Alliance Scales (CALPAS)                      | Barkham <sup>270</sup>        | 1993 | 467        | patient-centered care    | good                 | not assessed      | not assessed      | excellent              | good                | good               | not assessed       | not assessed   |
| 331. | Helping Alliance Questionnaire (HAQ)                                   | Bale <sup>271</sup>           | 2006 | 420        | patient-centered care    | fair                 | not assessed      | not assessed      | not assessed           | poor                | good               | not assessed       | not assessed   |
| 332. | Hospital Survey of Patient Safety Culture (HSOPSC)                     | Nie, Y. <sup>272</sup>        | 2013 | 265        | patient-centered care    | good                 | not assessed      | not assessed      | not assessed           | good                | not assessed       | not assessed       | not assessed   |
| 333. | Working Alliance Inventory (WAI)                                       | Bale <sup>271</sup>           | 2006 | 419        | patient-centered care    | fair                 | not assessed      | not assessed      | not assessed           | poor                | good               | not assessed       | not assessed   |

### ORGANIZATIONAL INTEGRATION

|      | Index Instrument                               | Reference Study              | Year | Study Code | Construct classification             | Internal consistency | Reliability score | Measurement error | Content validity score | Structural validity | Hypothesis testing | Criterion validity | Responsiveness |
|------|------------------------------------------------|------------------------------|------|------------|--------------------------------------|----------------------|-------------------|-------------------|------------------------|---------------------|--------------------|--------------------|----------------|
| 334. | EUROPEP                                        | Haggerty <sup>273</sup>      | 2011 | 488        | care continuity / comprehensive care | excellent            | not assessed      | not assessed      | not assessed           | excellent           | not assessed       | not assessed       | not assessed   |
| 335. | Primary Care Assessment Survey (PCAS)          | Haggerty <sup>273</sup>      | 2011 | 486        | care continuity / comprehensive care | excellent            | not assessed      | not assessed      | not assessed           | excellent           | not assessed       | not assessed       | not assessed   |
| 336. | Primary Care Assessment Tool (PCAT)            | Haggerty <sup>10</sup>       | 2011 | 158        | care continuity / comprehensive care | excellent            | not assessed      | not assessed      | excellent              | excellent           | not assessed       | not assessed       | not assessed   |
| 337. | Jones Synergy Scale                            | Jones, J. <sup>274</sup>     | 2011 | 205        | care coordination / case management  | fair                 | not assessed      | not assessed      | fair                   | fair                | not assessed       | fair               | not assessed   |
| 338. | Assessment of Chronic Illness Care (ACIC)      | Cramm <sup>275</sup>         | 2011 | 444        | care integration                     | not assessed         | not assessed      | not assessed      | not assessed           | excellent           | not assessed       | not assessed       | poor           |
| 339. | Assessment of Chronic Illness Care (ACIC)      | Cramm <sup>275</sup>         | 2011 | 445        | care integration                     | good                 | not assessed      | not assessed      | not assessed           | excellent           | not assessed       | not assessed       | poor           |
| 340. | Components of Primary Care Index (CPCI)        | Haggerty <sup>30</sup>       | 2011 | 484        | care integration                     | excellent            | not assessed      | not assessed      | not assessed           | excellent           | not assessed       | not assessed       | not assessed   |
| 341. | Human Service Integration Measure              | Browne, G. <sup>276</sup>    | 2004 | 61         | care integration                     | not assessed         | not assessed      | not assessed      | excellent              | poor                | poor               | poor               | not assessed   |
| 342. | Medical Home Index (MHI)                       | Cooley, W. C. <sup>277</sup> | 2003 | 86         | care integration                     | poor                 | fair              | not assessed      | excellent              | poor                | fair               | not assessed       | not assessed   |
| 343. | Primary Care Assessment Survey (PCAS)          | Haggerty <sup>30</sup>       | 2011 | 482        | care integration                     | excellent            | not assessed      | not assessed      | not assessed           | excellent           | not assessed       | not assessed       | not assessed   |
| 344. | Primary Care Assessment Tool (PCAT)            | Haggerty <sup>10</sup>       | 2011 | 161        | care integration                     | excellent            | not assessed      | not assessed      | excellent              | excellent           | not assessed       | not assessed       | not assessed   |
| 345. | Primary Care Assessment Tool (PCAT)            | Cassady <sup>278</sup>       | 2000 | 436        | care integration                     | good                 | fair              | not assessed      | excellent              | good                | good               | not assessed       | not assessed   |
| 346. | Veterans Affairs Outpatient Community Services | Haggerty <sup>30</sup>       | 2011 | 485        | care integration                     | excellent            | not assessed      | not assessed      | not assessed           | excellent           | not assessed       | not assessed       | not assessed   |

### FUNCTIONAL INTEGRATION

|      | Index Instrument                                 | Reference Study                             | Year | Study Code | Construct classification | Internal consistency | Reliability score | Measurement error | Content validity score | Structural validity | Hypothesis testing | Criterion validity | Responsiveness |
|------|--------------------------------------------------|---------------------------------------------|------|------------|--------------------------|----------------------|-------------------|-------------------|------------------------|---------------------|--------------------|--------------------|----------------|
| 347. | Geriatric Care Environment Scale (GCES)          | Paulo de Almeida Tavares, J. <sup>279</sup> | 2013 | 282        | care integration         | fair                 | not assessed      | not assessed      | not assessed           | fair                | fair               | not assessed       | not assessed   |
| 348. | Interpersonal Processes of Care version (IPC-II) | Haggerty <sup>29</sup>                      | 2011 | 480        | care integration         | excellent            | not assessed      | not assessed      | not assessed           | excellent           | not assessed       | not assessed       | not assessed   |
| 349. | Scale of Functional Integration                  | Ahgren, B. <sup>280</sup>                   | 2005 | 6          | care integration         | poor                 | not assessed      | not assessed      | fair                   | poor                | poor               | not assessed       | not assessed   |

### COMBINATION OF DOMAINS

|      | Index Instrument                                                        | Reference Study                         | Year | Study Code | Construct classification             | Internal consistency | Reliability score | Measurement error | Content validity score | Structural validity | Hypothesis testing | Criterion validity | Responsiveness |
|------|-------------------------------------------------------------------------|-----------------------------------------|------|------------|--------------------------------------|----------------------|-------------------|-------------------|------------------------|---------------------|--------------------|--------------------|----------------|
| 350. | Continuity of Care Measure (CCM)                                        | Haggerty, J. L. <sup>281</sup>          | 2012 | 162        | care continuity / comprehensive care | poor                 | not assessed      | not assessed      | not assessed           | excellent           | poor               | not assessed       | poor           |
| 351. | Coordination of Handoff Effectiveness Questionnaire (CHEQ)              | Block, M. <sup>282</sup>                | 2013 | 54         | care continuity / comprehensive care | poor                 | not assessed      | not assessed      | excellent              | not assessed        | not assessed       | not assessed       | fair           |
| 352. | Cuestionario Continuidad Asistencial Entre Niveles de Atención (CCAENA) | Aller, M. B. <sup>283</sup>             | 2013 | 10         | care continuity / comprehensive care | excellent            | not assessed      | not assessed      | excellent              | good                | good               | not assessed       | not assessed   |
| 353. | Handoff clinical evaluation exercise (CEX)                              | Horwitz, L. I. <sup>284</sup>           | 2013 | 185        | care continuity / comprehensive care | fair                 | poor              | not assessed      | excellent              | not assessed        | not assessed       | not assessed       | not assessed   |
| 354. | Handoff clinical evaluation exercise (CEX)                              | Horwitz, L. I. <sup>285</sup>           | 2013 | 187        | care continuity / comprehensive care | fair                 | poor              | not assessed      | excellent              | not assessed        | not assessed       | not assessed       | not assessed   |
| 355. | Handoff clinical evaluation exercise (CEX)                              | Horwitz, L. I. <sup>284</sup>           | 2013 | 186        | care continuity / comprehensive care | fair                 | poor              | not assessed      | excellent              | not assessed        | not assessed       | not assessed       | not assessed   |
| 356. | Handoff clinical evaluation exercise (CEX)                              | Horwitz, L. I. <sup>285</sup>           | 2013 | 188        | care continuity / comprehensive care | fair                 | poor              | not assessed      | excellent              | not assessed        | not assessed       | not assessed       | not assessed   |
| 357. | Heart Continuity of Care Questionnaire (HCCQ)                           | Hadjistavropoulos, H. D. <sup>286</sup> | 2004 | 155        | care continuity / comprehensive care | excellent            | not assessed      | not assessed      | not assessed           | excellent           | fair               | not assessed       | not assessed   |
| 358. | Team Evaluation and Assessment Measure (TEAM)                           | Taylor, C. <sup>287</sup>               | 2012 | 354        | care coordination / case management  | poor                 | not assessed      | not assessed      | good                   | not assessed        | fair               | not assessed       | not assessed   |
| 359. | Assessment of Chronic Illness Care (ACIC)                               | Bonomi, A. E. <sup>288</sup>            | 2002 | 55         | care integration                     | poor                 | not assessed      | not assessed      | fair                   | poor                | poor               | not assessed       | poor           |
| 360. | Components of Primary Care Index (CPCI)                                 | Haggerty <sup>29</sup>                  | 2011 | 478        | care integration                     | excellent            | not assessed      | not assessed      | not assessed           | excellent           | not assessed       | not assessed       | not assessed   |
| 361. | Consumer Assessment of Behavioral Health Survey (CABHS)                 | Eisen <sup>81</sup>                     | 2001 | 455        | care integration                     | excellent            | not assessed      | not assessed      | excellent              | excellent           | not assessed       | excellent          | not assessed   |

|      | Index Instrument                                             | Reference Study               | Year | Study Code | Construct classification | Internal consistency | Reliability score | Measurement error | Content validity score | Structural validity | Hypothesis testing | Criterion validity | Responsiveness |
|------|--------------------------------------------------------------|-------------------------------|------|------------|--------------------------|----------------------|-------------------|-------------------|------------------------|---------------------|--------------------|--------------------|----------------|
| 362. | <b>EUROPEP</b>                                               | Haggerty <sup>29</sup>        | 2011 | 479        | care integration         | excellent            | not assessed      | not assessed      | not assessed           | excellent           | not assessed       | not assessed       | not assessed   |
| 363. | Geriatric Care Environment Scale (GCES)                      | Kim, H. <sup>289</sup>        | 2007 | 214        | care integration         | fair                 | not assessed      | not assessed      | fair                   | poor                | not assessed       | not assessed       | not assessed   |
| 364. | Index of GP integration (GP questionnaire)                   | Batterham, R. <sup>290</sup>  | 2002 | 36         | care integration         | excellent            | not assessed      | not assessed      | excellent              | excellent           | poor               | not assessed       | not assessed   |
| 365. | Patient Assessment of Chronic Illness Care (PACIC)           | Glasgow, R. E. <sup>291</sup> | 2005 | 149        | care integration         | good                 | good              | not assessed      | excellent              | good                | good               | not assessed       | not assessed   |
| 366. | Patient Perceptions of Integrated Care Survey                | Singer, S. J. <sup>292</sup>  | 2013 | 330        | care integration         | fair                 | not assessed      | not assessed      | fair                   | fair                | fair               | not assessed       | not assessed   |
| 367. | <b>Primary Care Assessment Survey (PCAS)</b>                 | Haggerty <sup>29</sup>        | 2011 | 476        | care integration         | excellent            | not assessed      | not assessed      | not assessed           | excellent           | not assessed       | not assessed       | not assessed   |
| 368. | <b>Primary Care Assessment Tool (PCAT)</b>                   | Haggerty <sup>273</sup>       | 2011 | 487        | care integration         | excellent            | not assessed      | not assessed      | not assessed           | excellent           | not assessed       | not assessed       | not assessed   |
| 369. | Unnamed 21                                                   | Uyei, J. <sup>293</sup>       | 2014 | 368        | care integration         | fair                 | fair              | not assessed      | good                   | fair                | fair               | not assessed       | not assessed   |
| 370. | Unnamed 24                                                   | Zineldin, M. <sup>294</sup>   | 2011 | 403        | care integration         | poor                 | not assessed      | not assessed      | not assessed           | fair                | not assessed       | not assessed       | not assessed   |
| 371. | Unnamed 7                                                    | Lukas, C. V. <sup>295</sup>   | 2002 | 239        | care integration         | fair                 | not assessed      | not assessed      | fair                   | fair                | not assessed       | poor               | not assessed   |
| 372. | Veterans Affairs Outpatient Community Services               | Haggerty <sup>281</sup>       | 2011 | 481        | care integration         | excellent            | not assessed      | not assessed      | not assessed           | excellent           | not assessed       | not assessed       | not assessed   |
| 373. | Clinical Risk Monitoring Instrument                          | Briner, M. <sup>296</sup>     | 2010 | 59         | patient-centered care    | not assessed         | not assessed      | not assessed      | excellent              | not assessed        | not assessed       | not assessed       | not assessed   |
| 374. | Individualized Care Inventory                                | O'Rourke <sup>297</sup>       | 2009 | 563        | patient-centered care    | fair                 | not assessed      | not assessed      | not assessed           | fair                | not assessed       | not assessed       | not assessed   |
| 375. | Individualized Care Inventory                                | O'Rourke <sup>297</sup>       | 2009 | 564        | patient-centered care    | fair                 | not assessed      | not assessed      | not assessed           | fair                | not assessed       | not assessed       | not assessed   |
| 376. | Internal Participation Scale (IPS)                           | Korner, M. <sup>298</sup>     | 2013 | 220        | patient-centered care    | poor                 | not assessed      | not assessed      | not assessed           | poor                | poor               | not assessed       | not assessed   |
| 377. | Internal Participation Scale (IPS)                           | Korner, M. <sup>298</sup>     | 2013 | 221        | patient-centered care    | poor                 | not assessed      | not assessed      | not assessed           | poor                | poor               | not assessed       | not assessed   |
| 378. | Multidimensional Trust in Health Care Systems Scale (MTHCSS) | Egede, L. E. <sup>299</sup>   | 2008 | 119        | patient-centered care    | fair                 | not assessed      | not assessed      | excellent              | fair                | fair               | not assessed       | not assessed   |
| 379. | <b>Primary Care Assessment Survey (PCAS)</b>                 | Safran <sup>300</sup>         | 1998 | 577        | patient-centered care    | poor                 | fair              | not assessed      | not assessed           | not assessed        | not assessed       | not assessed       | not assessed   |

\* Index instruments are the main instruments validated in studies included in the review; other instruments used as gold standard for criterion validity or comparators to test convergent/divergent validity are not presented in the summary

\*\* Assumed when not specified in the paper

^ described other instruments but only tested for the main instrument measuring inter-organizational linkages in general practice (GCP-LI); no psychometric properties for the other 3 tools (which were used to validate the GCP-LI)

^^ described other instruments but analysis was only performed using the combined items in the Process and Outcome index tools

Boldface: Example of different studies measuring different constructs using the same instrument

## References

- Tobon JJ, Reid GJ, Goffin RD. Continuity of Care in Children's Mental Health: Development of a Measure. *Administration and policy in mental health*. Sep 28 2013.
- Durbin J, Goering P, Streiner DL, Pink G. Continuity of care: validation of a new self-report measure for individuals using mental health services. *The journal of behavioral health services & research*. Jul-Sep 2004;31(3):279-296.
- Joyce AS, Adair CE, Wild TC, et al. Continuity of care: validation of a self-report measure to assess client perceptions of mental health service delivery. *Community mental health journal*. Apr 2010;46(2):192-208.
- Bull MJ, Luo D, Maruyama GM. Measuring continuity of elders' posthospital care. *Journal of nursing measurement*. Summer 2000;8(1):41-60.
- Bakshi AB, Wee SL, Tay C, et al. Validation of the care transition measure in multi-ethnic South-East Asia in Singapore. *BMC health services research*. 2012;12:256.
- Parry C, Mahoney E, Chalmers SA, Coleman EA. Assessing the quality of transitional care: further applications of the care transitions measure. *Medical care*. Mar 2008;46(3):317-322.
- Coleman EA, Mahoney E, Parry C. Assessing the quality of preparation for posthospital care from the patient's perspective: the care transitions measure. *Medical care*. Mar 2005;43(3):246-255.
- Coleman EA, Smith JD, Frank JC, Eilertsen TB, Thiare JN, Kramer AM. Development and testing of a measure designed to assess the quality of care transitions. *International journal of integrated care*. 2002;2:e02.
- Shadmi E, Zisberg A, Coleman EA. Translation and validation of the Care Transition Measure into Hebrew and Arabic. *International journal for quality in health care : journal of the International Society for Quality in Health Care / ISQua*. Apr 2009;21(2):97-102.
- Haggerty JL, Beaulieu MD, Pineault R, et al. Comprehensiveness of care from the patient perspective: comparison of primary healthcare evaluation instruments. *Healthcare policy = Politiques de sante*. Dec 2011;7(Spec Issue):154-166.
- Chavez LM, Canino G, Shrout PE, Barrio C, Ware NC. Psychometric evaluation of the Spanish version of CONNECT: a measure of continuity of care in mental health services. *International journal of methods in psychiatric research*. 2007;16(1):23-33.
- Ware NC, Dickey B, Tugenberg T, McHorney CA. CONNECT: a measure of continuity of care in mental health services. *Mental health services research*. Dec 2003;5(4):209-221.
- Rose D, Sweeney A, Leese M, et al. Developing a user-generated measure of continuity of care: brief report. *Acta psychiatrica Scandinavica*. Apr 2009;119(4):320-324.
- Sweeney A, Rose D, Clement S, et al. Understanding service user-defined continuity of care and its relationship to health and social measures: a cross-sectional study. *BMC health services research*. 2012;12:145.
- Schaefer JA, Cronkite R, Ingudomnukul E. Assessing continuity of care practices in substance use disorder treatment programs. *Journal of studies on alcohol*. Jul 2004;65(4):513-520.
- Dolovich LR, Nair KM, Ciliska DK, et al. The Diabetes Continuity of Care Scale: the development and initial evaluation of a questionnaire that measures continuity of care from the patient perspective. *Health & social care in the community*. Nov 2004;12(6):475-487.
- Gulliford MC, Naithani S, Morgan M. Measuring continuity of care in diabetes mellitus: an experience-based measure. *Annals of family medicine*. Nov-Dec 2006;4(6):548-555.
- Amoroso C, Proudfoot J, Bubner T, et al. Validation of an instrument to measure inter-organisational linkages in general practice. *International journal of integrated care*. 2007;7:e46.
- Kowalyk KM, Hadjistavropoulos HD, Biem HJ. Measuring continuity of care for cardiac patients: development of a patient self-report questionnaire. *The Canadian journal of cardiology*. Feb 2004;20(2):205-212.
- Burns T, Catty J, White S, et al. Continuity of care in mental health: understanding and measuring a complex phenomenon. *Psychological medicine*. Feb 2009;39(2):313-323.
- King M, Jones L, Richardson A, et al. The relationship between patients' experiences of continuity of cancer care and health outcomes: a mixed methods study. *British journal of cancer*. Feb 12 2008;98(3):529-536.
- Bentler SE, Morgan RO, Virnig BA, Wolinsky FD. Evaluation of a patient-reported continuity of care model for older adults. *Quality of life research : an international journal of quality of life aspects of treatment, care and rehabilitation*. Feb 2014;23(1):185-193.
- Uijen AA, Schellevis FG, van den Bosch WJ, Mokkink HG, van Weel C, Schers HJ. Nijmegen Continuity Questionnaire: development and testing of a questionnaire that measures continuity of care. *Journal of clinical epidemiology*. Dec 2011;64(12):1391-1399.
- Uijen AA, Heinst CW, Schellevis FG, et al. Measurement properties of questionnaires measuring continuity of care: a systematic review. *PloS one*. 2012;7(7):e42256.
- Epstein EG, Miles A, Rovnyak V, Baernholdt M. Parents' perceptions of continuity of care in the neonatal intensive care unit: pilot testing an instrument and implications for the nurse-parent relationship. *The Journal of perinatal & neonatal nursing*. Apr-Jun 2013;27(2):168-175.
- Hadjistavropoulos H, Biem H, Sharpe D, Bourgault-Fagnou M, Janzen J. Patient perceptions of hospital discharge: reliability and validity of a Patient Continuity of Care Questionnaire. *International journal for quality in health care : journal of the International Society for Quality in Health Care / ISQua*. Oct 2008;20(5):314-323.
- Chao J. Continuity of care: incorporating patient perceptions. *Family medicine*. Sep-Oct 1988;20(5):333-337.
- Nagpal K, Abboudi M, Fischler L, et al. Evaluation of postoperative handover using a tool to assess information transfer and teamwork. *Annals of surgery*. Apr 2011;253(4):831-837.
- Haggerty JL, Burge F, Beaulieu MD, et al. Validation of instruments to evaluate primary healthcare from the patient perspective: overview of the method. *Healthcare policy = Politiques de sante*. Dec 2011;7(Spec Issue):31-46.
- Haggerty JL, Burge F, Pineault R, et al. Management continuity from the patient perspective: comparison of primary healthcare evaluation instruments. *Healthcare policy = Politiques de sante*. Dec 2011;7(Spec Issue):139-153.
- Gulliford M, Cowie L, Morgan M. Relational and management continuity survey in patients with multiple long-term conditions. *Journal of health services research & policy*. Apr 2011;16(2):67-74.
- Omondi Aduda DS, Ouma C, Onyango M, Bertrand J. Systematic monitoring of male circumcision scale-up in Nyanza, Kenya: exploratory factor analysis of service quality instrument and performance ranking. *PloS one*. 2014;9(7):e101235.
- McLaughlin SE, Diener-West M, Indurkha A, Rubin H, Heckmann R, Boyle MP. Improving transition from pediatric to adult cystic fibrosis care: lessons from a national survey of current practices. *Pediatrics*. May 2008;121(5):e1160-1166.
- Masters S, Giles L, Halbert J, Crotty M. Development and testing of a questionnaire to measure older people's experience of the Transition Care Program in Australia. *Australasian journal on ageing*. Dec 2010;29(4):172-178.
- Wholey DR, Zhu X, Knoke D, Shah P, Zellmer-Bruhn M, Witheridge TF. The teamwork in assertive community treatment (TACT) scale: development and validation. *Psychiatric services (Washington, D.C.)*. Nov 2012;63(11):1108-1117.
- Hadjistavropoulos HD, Sagan M, Bierlein C, Lawson K. Development of a case management quality questionnaire. *Care management journals : Journal of case management ; The journal of long term home health care*. Spring 2003;4(1):8-17.
- McGuiness C, Sibthorpe B. Development and initial validation of a measure of coordination of health care. *International journal for quality in health care : journal of the International Society for Quality in Health Care / ISQua*. Aug 2003;15(4):309-318.
- Balstad A, Springer P. Quantifying case management workloads: Development of the PACE tool. *Lippincott's case management : managing the process of patient care*. Nov-Dec 2006;11(6):291-302; quiz 303-294.
- Grimmer K, Moss J. The development, validity and application of a new instrument to assess the quality of discharge planning activities from the community perspective. *International journal for quality in health care : journal of the International Society for Quality in Health Care / ISQua*. Apr 2001;13(2):109-116.
- Samele C, Gilvarry C, Walsh E, Manley C, van Os J, Murray R. Patients' perceptions of intensive case management. *Psychiatric services (Washington, D.C.)*. Nov 2002;53(11):1432-1437.
- Young JM, Walsh J, Butow PN, Solomon MJ, Shaw J. Measuring cancer care coordination: development and validation of a questionnaire for patients. *BMC cancer*. 2011;11:298.
- Dobrow MJ, Paszat L, Golden B, et al. Measuring Integration of Cancer Services to Support Performance Improvement: The CSI Survey. *Healthcare policy = Politiques de sante*. Aug 2009;5(1):35-53.
- Seys D, Deneckere S, Sermeus W, et al. The Care Process Self-Evaluation Tool: a valid and reliable instrument for measuring care process organization of health care teams. *BMC health services research*. 2013;13:325.



44. Vanhaecht K, De Witte K, Depreitere R, et al. Development and validation of a care process self-evaluation tool. *Health services management research : an official journal of the Association of University Programs in Health Administration / HSMC, AUPHA*. Aug 2007;20(3):189-202.
45. Cramm JM, Strating MM, Nieboer AP. Validation of the caregivers' satisfaction with Stroke Care Questionnaire: C-SASC hospital scale. *Journal of neurology*. Jun 2011;258(6):1008-1012.
46. Bakker FC, Persoon A, Schoon Y, Marcel G, Rikkert O. The carewell in hospital questionnaire: A measure of frail elderly inpatient experiences with individualized and integrated hospital care. *Journal of hospital medicine : an official publication of the Society of Hospital Medicine*. May 2014;9(5):324-329.
47. Flocke SA. Measuring attributes of primary care: development of a new instrument. *The Journal of family practice*. Jul 1997;45(1):64-74.
48. Scholle SH, Vuong O, Ding L, et al. Development of and field test results for the CAHPS PCMH Survey. *Medical care*. Nov 2012;50 Suppl:S2-10.
49. Arah OA, ten Asbroek AH, Delnoij DM, et al. Psychometric properties of the Dutch version of the Hospital-level Consumer Assessment of Health Plans Survey instrument. *Health services research*. Feb 2006;41(1):284-301.
50. Gallagher P, Ding L, Ham HP, Schor EL, Hays RD, Cleary PD. Development of a new patient-based measure of pediatric ambulatory care. *Pediatrics*. Nov 2009;124(5):1348-1354.
51. Hargraves JL, Hays RD, Cleary PD. Psychometric properties of the Consumer Assessment of Health Plans Study (CAHPS) 2.0 adult core survey. *Health services research*. Dec 2003;38(6 Pt 1):1509-1527.
52. Hays RD, Shaul JA, Williams VS, et al. Psychometric properties of the CAHPS 1.0 survey measures. Consumer Assessment of Health Plans Study. *Medical care*. Mar 1999;37(3 Suppl):Ms22-31.
53. Solomon LS, Hays RD, Zaslavsky AM, Ding L, Cleary PD. Psychometric properties of a group-level Consumer Assessment of Health Plans Study (CAHPS) instrument. *Medical care*. Jan 2005;43(1):53-60.
54. Clark C, Young MS, Jackson E, et al. Consumer perceptions of integrated trauma-informed services among women with co-occurring disorders. *The journal of behavioral health services & research*. Jan 2008;35(1):71-90.
55. Berendsen AJ, Groenier KH, de Jong GM, et al. Assessment of patient's experiences across the interface between primary and secondary care: Consumer Quality Index Continuum of care. *Patient education and counseling*. Oct 2009;77(1):123-127.
56. Booi J, Zegers M, Evers PM, Hendriks M, Delnoij DM, Rademakers JJ. Improving cancer patient care: development of a generic cancer consumer quality index questionnaire for cancer patients. *BMC cancer*. 2013;13:203.
57. Howie JG, Heaney DJ, Maxwell M, Walker JJ, Freeman GK. Developing a 'consultation quality index' (CQI) for use in general practice. *Family practice*. Dec 2000;17(6):455-461.
58. Stubbe JH, Brouwer W, Delnoij DM. Patients' experiences with quality of hospital care: the Consumer Quality Index Cataract Questionnaire. *BMC ophthalmology*. 2007;7:14.
59. Stubbe JH, Gelsema T, Delnoij DM. The Consumer Quality Index Hip Knee Questionnaire measuring patients' experiences with quality of care after a total hip or knee arthroplasty. *BMC health services research*. 2007;7:60.
60. Triemstra M, Winters S, Kool RB, Wiegers TA. Measuring client experiences in long-term care in the Netherlands: a pilot study with the Consumer Quality Index Long-term Care. *BMC health services research*. 2010;10:95.
61. Wenghofer EF, Williams AP, Klass DJ, Faulkner D. Physician-patient encounters: the structure of performance in family and general office practice. *The Journal of continuing education in the health professions*. Fall 2006;26(4):285-293.
62. Ahgren B, Axelsson SB, Axelsson R. Evaluating intersectoral collaboration: a model for assessment by service users. *International journal of integrated care*. 2009;9:e03.
63. McGovern MP, Urada D, Lambert-Harris C, Sullivan ST, Mazade NA. Development and initial feasibility of an organizational measure of behavioral health integration in medical care settings. *Journal of substance abuse treatment*. Dec 2012;43(4):402-409.
64. Jaturapatporn D, Hathirat S, Manataweewat B, et al. Reliability and validity of a Thai version of the General Practice Assessment Questionnaire (GPAQ). *Journal of the Medical Association of Thailand = Chotmaihet thangphaet*. Sep 2006;89(9):1491-1496.
65. Mead N, Bower P, Roland M. The General Practice Assessment Questionnaire (GPAQ) - development and psychometric characteristics. *BMC family practice*. 2008;9:13.
66. Ramsay J, Campbell JL, Schroter S, Green J, Roland M. The General Practice Assessment Survey (GPAS): tests of data quality and measurement properties. *Family practice*. Oct 2000;17(5):372-379.
67. Bower P, Mead N, Roland M. What dimensions underlie patient responses to the General Practice Assessment Survey? A factor analytic study. *Family practice*. Oct 2002;19(5):489-495.
68. Jayasinghe UW, Proudfoot J, Holton C, et al. Chronically ill Australians' satisfaction with accessibility and patient-centredness. *International journal for quality in health care : journal of the International Society for Quality in Health Care / ISQua*. Apr 2008;20(2):105-114.
69. Lyratzopoulos G, Elliott MN, Barbieri JM, et al. How can health care organizations be reliably compared?: Lessons from a national survey of patient experience. *Medical care*. Aug 2011;49(8):724-733.
70. Kim SC, Boren D, Solem SL. The Kim Alliance Scale: development and preliminary testing. *Clinical nursing research*. Aug 2001;10(3):314-331.
71. Bjerre IM, Larsson M, Franzon AM, Nilsson MS, Stromberg G, Westbom LM. Measure of Processes of Care (MPOC) applied to measure parent's perception of the habilitation process in Sweden. *Child: care, health and development*. Mar 2004;30(2):123-130.
72. Himuro N, Kozuka N, Mori M. Measurement of family-centred care: translation, adaptation and validation of the Measure of Processes of Care (MPOC-56 and -20) for use in Japan. *Child: care, health and development*. May 2013;39(3):358-365.
73. Klassen AF, Dix D, Cano SJ, Papsdorf M, Sung L, Klaassen RJ. Evaluating family-centred service in paediatric oncology with the measure of processes of care (MPOC-20). *Child: care, health and development*. Jan 2009;35(1):16-22.
74. Siebes RC, Maassen GH, Wijnroks L, et al. Quality of paediatric rehabilitation from the parent perspective: validation of the short Measure of Processes of Care (MPOC-20) in the Netherlands. *Clinical rehabilitation*. Jan 2007;21(1):62-72.
75. King SM, Rosenbaum PL, King GA. Parents' perceptions of caregiving: development and validation of a measure of processes. *Developmental medicine and child neurology*. Sep 1996;38(9):757-772.
76. Tang HN, Chong WH, Goh W, Chan WP, Choo S. Evaluation of family-centred practices in the early intervention programmes for infants and young children in Singapore with Measure of Processes of Care for Service Providers and Measure of Beliefs about Participation in Family-Centred Service. *Child: care, health and development*. Jan 2012;38(1):54-60.
77. King S, King G, Rosenbaum P. Evaluating Health Service Delivery to Children With Chronic Conditions and Their Families: Development of a Refined Measure of Processes of Care (MPOC-20). *Children's Health Care*. 2004/03/01 2004;33(1):35-57.
78. Saloojee GM, Rosenbaum PR, Westaway MS, Stewart AV. Development of a measure of family-centred care for resource-poor South African settings: the experience of using a modified version of the MPOC-20. *Child: care, health and development*. Jan 2009;35(1):23-32.
79. McConachie H, Logan S. Validation of the measure of processes of care for use when there is no Child Development Centre. *Child: care, health and development*. Jan 2003;29(1):35-45.
80. Harley C, Adams J, Booth L, Selby P, Brown J, Velikova G. Patient experiences of continuity of cancer care: development of a new medical care questionnaire (MCQ) for oncology outpatients. *Value in health : the journal of the International Society for Pharmacoeconomics and Outcomes Research*. Nov-Dec 2009;12(8):1180-1186.
81. Eisen SV, Shaul JA, Leff HS, Stringfellow V, Clarridge BR, Cleary PD. Toward a national consumer survey: evaluation of the CABHS and MHSIP instruments. *The journal of behavioral health services & research*. Aug 2001;28(3):347-369.
82. Zwier G. A standardised and validated patient survey in primary care: introducing the New Zealand General Practice Assessment Questionnaire (NZGPAQ). *The New Zealand medical journal*. Apr 5 2013;126(1372):47-54.
83. Mueller C, Savik K. Identifying and validating the components of nursing practice models for long-term care facilities. *Research in gerontological nursing*. Oct 2010;3(4):270-281.
84. Holburn S, Jacobson JW, Vietze PM, Schwartz AA, Sersen E. Quantifying the process and outcomes of person-centered planning. *American journal of mental retardation : AJMR*. Sep 2000;105(5):402-416.
85. Pett MA, Beck SL, Guo JW, et al. Confirmatory factor analysis of the pain care quality surveys (PainCQ(c)). *Health services research*. Jun 2013;48(3):1018-1038.
86. Seid M, Varni JW, Bermudez LO, et al. Parents' Perceptions of Primary Care: measuring parents' experiences of pediatric primary care quality. *Pediatrics*. Aug 2001;108(2):264-270.
87. Cramm JM, Nieboer AP. Factorial validation of the Patient Assessment of Chronic Illness Care (PACIC) and PACIC short version (PACIC-S) among cardiovascular disease patients in the Netherlands. *Health and quality of life outcomes*. 2012;10:104.
88. Gugiu PC, Coryn C, Clark R, Kuehn A. Development and evaluation of the short version of the Patient Assessment of Chronic Illness Care instrument. *Chronic illness*. Dec 2009;5(4):268-276.
89. Rosemann T, Laux G, Droesemeyer S, Gensichen J, Szecsenyi J. Evaluation of a culturally adapted German version of the Patient Assessment of Chronic Illness Care (PACIC 5A) questionnaire in a sample of osteoarthritis patients. *Journal of evaluation in clinical practice*. Oct 2007;13(5):806-813.
90. Aragones A, Schaefer EW, Stevens D, Gourevitch MN, Glasgow RE, Shah NR. Validation of the Spanish translation of the Patient Assessment of Chronic Illness Care (PACIC) survey. *Preventing chronic disease*. Oct 2008;5(4):A113.
91. Gugiu C, Coryn CL, Applegate B. Structure and measurement properties of the Patient Assessment of Chronic Illness Care instrument. *Journal of evaluation in clinical practice*. Jun 2010;16(3):509-516.
92. Wensing M, van Lieshout J, Jung HP, Hermsen J, Rosemann T. The Patients Assessment Chronic Illness Care (PACIC) questionnaire in The Netherlands: a validation study in rural general practice. *BMC health services research*. 2008;8:182.
93. Baker R, Preston C, Cheater F, Hearnshaw H. Measuring patients' attitudes to care across the primary/secondary interface: the development of the patient career diary. *Quality in health care : QHC*. Sep 1999;8(3):154-160.
94. Steine S, Finset A, Laerum E. A new, brief questionnaire (PEQ) developed in primary health care for measuring patients' experience of interaction, emotion and consultation outcome. *Family practice*. Aug 2001;18(4):410-418.
95. Pettersen KI, Veenstra M, Guldvog B, Kolstad A. The Patient Experiences Questionnaire: development, validity and reliability. *International journal for quality in health care : journal of the International Society for Quality in Health Care / ISQua*. Dec 2004;16(6):453-463.
96. Alexander JA, Paustian M, Wise CG, et al. Assessment and measurement of patient-centered medical home implementation: the BCBSM experience. *Annals of family medicine*. May-Jun 2013;11 Suppl 1:S74-81.
97. Shi L, Starfield B, Xu J. Validating the adult primary care assessment tool. *J Fam Pract*. 2001;50(2):161-175.
98. Jeon KY. Cross-cultural adaptation of the US consumer form of the short Primary Care Assessment Tool (PCAT): the Korean consumer form of the short PCAT (KC PCAT) and the Korean standard form of the short PCAT (KS PCAT). *Quality in primary care*. 2011;19(2):85-103.
99. Lee JH, Choi YJ, Sung NJ, et al. Development of the Korean primary care assessment tool--measuring user experience: tests of data quality and measurement performance. *International journal for quality in health care : journal of the International Society for Quality in Health Care / ISQua*. Apr 2009;21(2):103-111.
100. Macinko J, Almeida C, de Sa PK. A rapid assessment methodology for the evaluation of primary care organization and performance in Brazil. *Health policy and planning*. May 2007;22(3):167-177.
101. Tarrant C, Baker R, Colman AM, et al. The prostate care questionnaire for patients (PCQ-P): reliability, validity and acceptability. *BMC health services research*. 2009;9:199.
102. Yun YH, Kim SH, Lee KM, et al. Patient-reported assessment of quality care at end of life: development and validation of Quality Care Questionnaire-End of Life (QCQ-EOL). *European journal of cancer (Oxford, England : 1990)*. Sep 2006;42(14):2310-2317.
103. Sixma HJ, van Campen C, Kerssens JJ, Peters L. Quality of care from the perspective of elderly people: the QUOTE-elderly instrument. *Age and ageing*. Mar 2000;29(2):173-178.
104. Nijkamp MD, Sixma HJ, Afman H, et al. Quality of care from the perspective of the cataract patient: the reliability and validity of the QUOTE-cataract. *The British journal of ophthalmology*. Aug 2002;86(8):840-842.
105. van der Eijk I, Sixma H, Smeets T, et al. Quality of health care in inflammatory bowel disease: development of a reliable questionnaire (QUOTE-IBD) and first results. *The American journal of gastroenterology*. Dec 2001;96(12):3329-3336.
106. van Campen C, Sixma HJ, Kerssens JJ, Peters L, Rasker JJ. Assessing patients' priorities and perceptions of the quality of health care: the development of the QUOTE-Rheumatic-Patients instrument. *British journal of rheumatology*. Apr 1998;37(4):362-368.
107. Curtis JR, Patrick DL, Engelberg RA, Norris K, Asp C, Byock I. A measure of the quality of dying and death. Initial validation using after-death interviews with family members. *Journal of pain and symptom management*. Jul 2002;24(1):17-31.
108. Schroder A, Larsson BW, Ahlstrom G, Lundqvist LO. Psychometric properties of the instrument quality in psychiatric care and descriptions of quality of care among in-patients. *International journal of health care quality assurance*. 2010;23(6):554-570.
109. Birnberg JM, Drum ML, Huang ES, et al. Development of a safety net medical home scale for clinics. *Journal of general internal medicine*. Dec 2011;26(12):1418-1425.
110. Tomes AE, Chee Peng Ng S. Service quality in hospital care: the development of an in-patient questionnaire. *International journal of health care quality assurance*. 1995;8(3):25-33.
111. Babakus E, Mangold WG. Adapting the SERVQUAL scale to hospital services: an empirical investigation. *Health services research*. Feb 1992;26(6):767-786.
112. Vandamme R, Leunis J. Development of a Multiple - item Scale for Measuring Hospital Service Quality. *International Journal of Service Industry Management*. 1993;4(3):30-49.
113. Wei X, Barnsley J, Zakus D, Cockerill R, Glazier R, Sun X. Assessing continuity of care in a community diabetes program: initial questionnaire development and validation. *Journal of clinical epidemiology*. Sep 2008;61(9):925-931.

114. de Kok M, Scholte RW, Sixma HJ, et al. The patient's perspective of the quality of breast cancer care. The development of an instrument to measure quality of care through focus groups and concept mapping with breast cancer patients. *European journal of cancer (Oxford, England : 1990)*. May 2007;43(8):1257-1264.
115. Wressle E, Eriksson L, Fahlander A, et al. Relatives' perspective on the quality of geriatric care and rehabilitation--development and testing of a questionnaire. *Scandinavian journal of caring sciences*. Dec 2008;22(4):590-595.
116. Haddad S, Potvin L, Roberge D, Pineault R, Remondin M. Patient perception of quality following a visit to a doctor in a primary care unit. *Family practice*. Feb 2000;17(1):21-29.
117. Misdrahi D, Verdoux H, Lancon C, Bayle F. The 4-Point ordinal Alliance Self-report: a self-report questionnaire for assessing therapeutic relationships in routine mental health. *Comprehensive psychiatry*. Mar-Apr 2009;50(2):181-185.
118. Agnew-Davies R, Stiles WB, Hardy GE, Barkham M, Shapiro DA. Alliance structure assessed by the Agnew Relationship Measure (ARM). *The British journal of clinical psychology / the British Psychological Society*. May 1998;37 ( Pt 2):155-172.
119. Stiles WB, Agnew-Davies R, Barkham M, et al. Convergent validity of the Agnew Relationship Measure and the Working Alliance Inventory. *Psychological assessment*. Jun 2002;14(2):209-220.
120. Safran DG, Karp M, Coltin K, et al. Measuring patients' experiences with individual primary care physicians. Results of a statewide demonstration project. *Journal of general internal medicine*. Jan 2006;21(1):13-21.
121. Sullivan JL, Meterko M, Baker E, et al. Reliability and validity of a person-centered care staff survey in veterans health administration community living centers. *The Gerontologist*. Aug 2013;53(4):596-607.
122. Gaston L. Reliability and criterion-related validity of the California Psychotherapy Alliance Scales—patient version. *Psychological Assessment: A Journal of Consulting and Clinical Psychology*. 1991;3(1):68-74.
123. Gaugler JE, Hobday JV, Savik K. The CARES((R)) Observational Tool: a valid and reliable instrument to assess person-centered dementia care. *Geriatric nursing (New York, N.Y.)*. May-Jun 2013;34(3):194-198.
124. Duffy JR, Brewer BB, Weaver MT. Revision and psychometric properties of the caring assessment tool. *Clinical nursing research*. Feb 2014;23(1):80-93.
125. Duffy JR, Hoskins L, Seifert RF. Dimensions of caring: psychometric evaluation of the caring assessment tool. *ANS. Advances in nursing science*. Jul-Sep 2007;30(3):235-245.
126. de Witte L, Schoot T, Proot I. Development of the client-centred care questionnaire. *Journal of advanced nursing*. Oct 2006;56(1):62-68.
127. Cott CA, Teare G, McGilton KS, Lineker S. Reliability and construct validity of the client-centred rehabilitation questionnaire. *Disability and rehabilitation*. Nov 30 2006;28(22):1387-1397.
128. Hibbard JH, Collins PA, Mahoney E, Baker LH. The development and testing of a measure assessing clinician beliefs about patient self-management. *Health expectations : an international journal of public participation in health care and health policy*. Mar 2010;13(1):65-72.
129. Barr PJ, Thompson R, Walsh T, Grande SW, Ozanne EM, Elwyn G. The psychometric properties of CollaboRATE: a fast and frugal patient-reported measure of the shared decision-making process. *Journal of medical Internet research*. 2014;16(1):e2.
130. Elwyn G, Barr PJ, Grande SW, Thompson R, Walsh T, Ozanne EM. Developing CollaboRATE: a fast and frugal patient-reported measure of shared decision making in clinical encounters. *Patient education and counseling*. Oct 2013;93(1):102-107.
131. Winning TA, Kinnell A, Wener ME, Mazurat N, D JS. Validity of scores from communication skills instruments for patients and their dental student-clinicians. *European journal of dental education : official journal of the Association for Dental Education in Europe*. May 2013;17(2):93-100.
132. Schonwetter DJ, Wener ME, Mazurat N. Determining the validity and reliability of clinical communication assessment tools for dental patients and students. *Journal of dental education*. Oct 2012;76(10):1276-1290.
133. Wener ME, Schonwetter DJ, Mazurat N. Developing new dental communication skills assessment tools by including patients and other stakeholders. *Journal of dental education*. Dec 2011;75(12):1527-1541.
134. Beaulieu MD, Haggerty JL, Beaulieu C, et al. Interpersonal communication from the patient perspective: comparison of primary healthcare evaluation instruments. *Healthcare policy = Politiques de sante*. Dec 2011;7(Spec Issue):108-123.
135. Fung CS, Hua A, Tam L, Mercer SW. Reliability and validity of the Chinese version of the CARE Measure in a primary care setting in Hong Kong. *Family practice*. Oct 2009;26(5):398-406.
136. Mercer SW, Maxwell M, Heaney D, Watt GC. The consultation and relational empathy (CARE) measure: development and preliminary validation and reliability of an empathy-based consultation process measure. *Family practice*. Dec 2004;21(6):699-705.
137. Mercer SW, Murphy DJ. Validity and reliability of the CARE Measure in secondary care. *Clinical Governance: An International Journal*. 2008;13(4):269-283.
138. Mercer SW, Neumann M, Wirtz M, Fitzpatrick B, Vojt G. General practitioner empathy, patient enablement, and patient-reported outcomes in primary care in an area of high socio-economic deprivation in Scotland--a pilot prospective study using structural equation modeling. *Patient education and counseling*. Nov 2008;73(2):240-245.
139. Mercer SW HD, Murray A, Murphy DJ, Eva HW. . Capturing patients' views on communication with anaesthetists: the CARE Measure. . *Clin Gov Int J*. 2008;13:128-137.
140. Doorenbos AZ, Schim SM, Benkert R, Borse NN. Psychometric evaluation of the cultural competence assessment instrument among healthcare providers. *Nursing research*. Sep-Oct 2005;54(5):324-331.
141. Katapodi MC, Pierce PF, Facione NC. Distrust, predisposition to use health services and breast cancer screening: results from a multicultural community-based survey. *International journal of nursing studies*. Aug 2010;47(8):975-983.
142. de Monchy C, Richardson R, Brown RA, Harden RM. Measuring attitudes of doctors: the doctor-patient (DP) rating. *Medical education*. May 1988;22(3):231-239.
143. Wilkerson L, Fung CC, May W, Elliott D. Assessing patient-centered care: one approach to health disparities education. *Journal of general internal medicine*. May 2010;25 Suppl 2:S86-90.
144. Dancet EA, Ameys L, Sermeus W, et al. The ENDOCARE questionnaire (ECQ): a valid and reliable instrument to measure the patient-centeredness of endometriosis care in Europe. *Human reproduction (Oxford, England)*. Nov 2011;26(11):2988-2999.
145. Martin LR, DiMatteo MR, Lepper HS. Facilitation of patient involvement in care: development and validation of a scale. *Behavioral medicine (Washington, D.C.)*. Fall 2001;27(3):111-120.
146. Casarett D, Pickard A, Bailey FA, et al. A nationwide VA palliative care quality measure: the family assessment of treatment at the end of life. *Journal of palliative medicine*. Jan-Feb 2008;11(1):68-75.
147. Reid RC, Chappell NL, Gish JA. Measuring family perceived involvement in individualized long-term care. *Dementia*. February 1, 2007 2007;6(1):89-104.
148. Clayton MF, Latimer S, Dunn TW, Haas L. Assessing patient-centered communication in a family practice setting: how do we measure it, and whose opinion matters? *Patient education and counseling*. Sep 2011;84(3):294-302.
149. Krupat E, Frankel R, Stein T, Irish J. The Four Habits Coding Scheme: validation of an instrument to assess clinicians' communication behavior. *Patient education and counseling*. Jul 2006;62(1):38-45.
150. Gan C, Campbell KA, Snider A, Cohen S, Hubbard J. Giving Youth a Voice (GYV): a measure of youths' perceptions of the client-centredness of rehabilitation services. *Canadian journal of occupational therapy. Revue canadienne d'ergotherapie*. Apr 2008;75(2):96-104.
151. Thompson HS, Valdimarsdottir HB, Winkel G, Jandorf L, Redd W. The Group-Based Medical Mistrust Scale: psychometric properties and association with breast cancer screening. *Preventive medicine*. Feb 2004;38(2):209-218.
152. Fiscella K, Franks P, Srinivasan M, Kravitz RL, Epstein R. Ratings of physician communication by real and standardized patients. *Annals of family medicine*. Mar-Apr 2007;5(2):151-158.
153. Gremigni P, Sommaruga M, Peltenburg M. Validation of the Health Care Communication Questionnaire (HCCQ) to measure outpatients' experience of communication with hospital staff. *Patient education and counseling*. Apr 2008;71(1):57-64.
154. Bova C, Fennie KP, Watrous E, Dieckhaus K, Williams AB. The health care relationship (HCR) trust scale: development and psychometric evaluation. *Research in nursing & health*. Oct 2006;29(5):477-488.
155. Rose A, Peters N, Shea JA, Armstrong K. Development and testing of the health care system distrust scale. *Journal of general internal medicine*. Jan 2004;19(1):57-63.
156. De Weert-Van Oene GH, De Jong CA, Jorg F, Schrijvers GJ. The Helping Alliance Questionnaire: psychometric properties in patients with substance dependence. *Substance use & misuse*. Sep 1999;34(11):1549-1569.
157. Charalambous A, Chappell NL, Katajisto J, Suhonen R. The conceptualization and measurement of individualized care. *Geriatric nursing (New York, N.Y.)*. Jan-Feb 2012;33(1):17-27.
158. Petroz U, Kennedy D, Webster F, Nowak A. Patients' perceptions of individualized care: evaluating psychometric properties and results of the individualized care scale. *The Canadian journal of nursing research = Revue canadienne de recherche en sciences infirmieres*. Jun 2011;43(2):80-100.
159. Suhonen R, Gustafsson ML, Katajisto J, Valimaki M, Leino-Kilpi H. Individualized care scale - nurse version: a Finnish validation study. *Journal of evaluation in clinical practice*. Feb 2010;16(1):145-154.
160. Suhonen R, Valimaki M, Katajisto J. Developing and testing an instrument for the measurement of individual care. *Journal of advanced nursing*. Nov 2000;32(5):1253-1263.
161. Suhonen R, Berg A, Idvall E, et al. Adapting the Individualized Care Scale for cross-cultural comparison. *Scandinavian journal of caring sciences*. Jun 2010;24(2):392-403.
162. Blais MA. Development of an inpatient treatment alliance scale. *The Journal of nervous and mental disease*. Jul 2004;192(7):487-493.
163. Hojat M, Mangione S, Nasca T, Cohen M, Gonnella J, Erdmann J. The Jefferson Scale of Physician Empathy: development and preliminary psychometric data. *Educ Psychol Measurement*. 2001;61:349-365.
164. Byrne JM, Chang BK, Gilman SC, et al. The learners' perceptions survey-primary care: assessing resident perceptions of internal medicine continuity clinics and patient-centered care. *Journal of graduate medical education*. Dec 2013;5(4):587-593.
165. Campbell C, Lockyer J, Laidlaw T, Macleod H. Assessment of a matched-pair instrument to examine doctor-patient communication skills in practising doctors. *Medical education*. Feb 2007;41(2):123-129.
166. Woodside JM, Rosenbaum PL, King SM, King GA. Family-Centered Service: Developing and Validating a Self-Assessment Tool for Pediatric Service Providers. *Children's Health Care*. 2001/09/01 2001;30(3):237-252.
167. Goold SD, Fessler D, Moyer CA. A measure of trust in insurers. *Health services research*. Feb 2006;41(1):58-78.
168. Chappell NL, Reid RC, Gish JA. Staff-based measures of individualized care for persons with dementia in long-term care facilities. *Dementia*. November 1, 2007 2007;6(4):527-547.
169. Cegala DJ, Coleman MT, Turner JW. The development and partial assessment of the medical communication competence scale. *Health communication*. 1998;10(3):261-288.
170. Valentine NB, Bonsel GJ, Murray CJ. Measuring quality of health care from the user's perspective in 41 countries: psychometric properties of WHO's questions on health systems responsiveness. *Quality of life research : an international journal of quality of life aspects of treatment, care and rehabilitation*. Sep 2007;16(7):1107-1125.
171. Elwyn G, Edwards A, Wensing M, Hood K, Atwell C, Grol R. Shared decision making: developing the OPTION scale for measuring patient involvement. *Quality & safety in health care*. Apr 2003;12(2):93-99.
172. Radwin L, Alster K, Rubin KM. Development and testing of the Oncology Patients' Perceptions of the Quality of Nursing Care Scale. *Oncology nursing forum*. Mar-Apr 2003;30(2):283-290.
173. Garratt AM, Bjaertnes OA, Krogstad U, Gulbrandsen P. The OutPatient Experiences Questionnaire (OPEQ): data quality, reliability, and validity in patients attending 52 Norwegian hospitals. *Quality & safety in health care*. Dec 2005;14(6):433-437.
174. Beck SL, Towsley GL, Berry PH, Brant JM, Smith EM. Measuring the quality of care related to pain management: a multiple-method approach to instrument development. *Nursing research*. Mar-Apr 2010;59(2):85-92.
175. Beck SL, Towsley GL, Pett MA, et al. Initial Psychometric Properties of the Pain Care Quality Survey (PainCQ). *The journal of pain : official journal of the American Pain Society*. Dec 2010;11(12):1311-1319.
176. Fowles JB, Terry P, Xi M, Hibbard J, Bloom CT, Harvey L. Measuring self-management of patients' and employees' health: further validation of the Patient Activation Measure (PAM) based on its relation to employee characteristics. *Patient education and counseling*. Oct 2009;77(1):116-122.
177. Skolasky RL, Green AF, Scharfstein D, Boulton C, Reider L, Wegener ST. Psychometric properties of the patient activation measure among multimorbid older adults. *Health services research*. Apr 2011;46(2):457-478.
178. Hibbard JH, Mahoney ER, Stockard J, Tusler M. Development and testing of a short form of the patient activation measure. *Health services research*. Dec 2005;40(6 Pt 1):1918-1930.
179. Hibbard JH, Stockard J, Mahoney ER, Tusler M. Development of the Patient Activation Measure (PAM): conceptualizing and measuring activation in patients and consumers. *Health services research*. Aug 2004;39(4 Pt 1):1005-1026.
180. Constand MK, MacDermid JC, Law M, Dal Bello-Haas V. Patient-centered care and distal radius fracture outcomes: A prospective cohort study analysis. *Journal of hand therapy : official journal of the American Society of Hand Therapists*. Apr 23 2014.
181. Galassi JP, Schanberg R, Ware WB. The Patient Reactions Assessment: A brief measure of the quality of the patient-provider medical relationship. *Psychological Assessment*. 1992;4(3):346-351.
182. Kempainen JK, O'Brien L, Williams H, Evans L, Weiner KN, Holzemer WL. Quantifying patient engagement with nurses: validation of a scale with AIDS patients. *Outcomes management for nursing practice*. Oct-Dec 1999;3(4):167-174.
183. Ngorsurach S, Lerkiatbundit S, Li SC, Treesak C, Sirithorn R, Korwittanakarn M. Development and validation of the patient trust in community pharmacists (TRUST-Ph) scale: results from a study conducted in Thailand. *Research in social & administrative pharmacy : RSAP*. Sep 2008;4(3):272-283.

184. Hwang JI. Development and testing of a patient-centred care competency scale for hospital nurses. *International journal of nursing practice*. Nov 13 2013.
185. Hannum Rose J, Bowman KF, O'Toole EE, et al. Caregiver objective burden and assessments of patient-centered, family-focused care for frail elderly veterans. *The Gerontologist*. Feb 2007;47(1):21-33.
186. de Kok M, Sixma HJ, van der Weijden T, et al. A patient-centred instrument for assessment of quality of breast cancer care: results of a pilot questionnaire. *Quality & safety in health care*. Dec 2010;19(6):e40.
187. Chesser A, Reyes J, Woods NK, Williams K, Kraft R. Reliability in patient-centered observations of family physicians. *Family medicine*. Jun 2013;45(6):428-432.
188. Pedro J, Canavarro MC, Boivin J, Gameiro S. Positive experiences of patient-centred care are associated with intentions to comply with fertility treatment: findings from the validation of the Portuguese version of the PCQ-Infertility tool. *Human reproduction (Oxford, England)*. Sep 2013;28(9):2462-2472.
189. van der Eijk M, Faber MJ, Ummels I, Aarts JW, Munneke M, Bloem BR. Patient-centeredness in PD care: development and validation of a patient experience questionnaire. *Parkinsonism & related disorders*. Nov 2012;18(9):1011-1016.
190. van Empel IW, Aarts JW, Cohlen BJ, et al. Measuring patient-centredness, the neglected outcome in fertility care: a random multicentre validation study. *Human reproduction (Oxford, England)*. Oct 2010;25(10):2516-2526.
191. Henbest RJ, Stewart MA. Patient-centredness in the consultation. 1: A method for measurement. *Family practice*. Dec 1989;6(4):249-253.
192. Rolfe G. The Patient-Centredness Multi-Choice Questionnaire: developing an instrument for the measurement of patient-centredness in student nurses. *Journal of advanced nursing*. Jan 1993;18(1):120-126.
193. Ridd MJ, Lewis G, Peters TJ, Salisbury C. Patient-doctor depth-of-relationship scale: development and validation. *Annals of family medicine*. Nov-Dec 2011;9(6):538-545.
194. Mingote Adan J, Moreno Jimenez B, Rodriguez Carvajal R, Galvez Herrero M, Ruiz Lopez P. Psychometric validation of the Spanish version of the Patient-Doctor Relationship Questionnaire (PDRQ). *Actas espanolas de psiquiatria*. Mar-Apr 2009;37(2):94-100.
195. Van der Feltz-Cornelis CM, Van Oppen P, Van Marwijk HW, De Beurs E, Van Dyck R. A patient-doctor relationship questionnaire (PDRQ-9) in primary care: development and psychometric evaluation. *General hospital psychiatry*. Mar-Apr 2004;26(2):115-120.
196. Juhnke C, Muhlbacher AC. Patient-centredness in integrated healthcare delivery systems - needs, expectations and priorities for organised healthcare systems. *International journal of integrated care*. 2013;13:e051.
197. Stewart AL, Naples-Springer AM, Gregorich SE, Santoyo-Olsson J. Interpersonal processes of care survey: patient-reported measures for diverse groups. *Health services research*. Jun 2007;42(3 Pt 1):1235-1256.
198. Carmen S, Teal S, Guzzetta CE. Development, testing, and national evaluation of a pediatric Patient-Family-Centered Care benchmarking survey. *Holistic nursing practice*. Mar-Apr 2008;22(2):61-74; quiz 75-66.
199. Moseley KL, Clark SJ, Gebremariam A, Sternthal MJ, Kemper AR. Parents' trust in their child's physician: using an adapted Trust in Physician Scale. *Ambulatory pediatrics : the official journal of the Ambulatory Pediatric Association*. Jan-Feb 2006;6(1):58-61.
200. Smith MY, Winkel G, Egert J, Diaz-Wionczek M, DuHamel KN. Patient-physician communication in the context of persistent pain: validation of a modified version of the patients' Perceived Involvement in Care Scale. *Journal of pain and symptom management*. Jul 2006;32(1):71-81.
201. Lerman CE, Brody DS, Caputo GC, Smith DG, Lazaro CG, Wolfson HG. Patients' Perceived Involvement in Care Scale: relationship to attitudes about illness and medical care. *Journal of general internal medicine*. Jan-Feb 1990;5(1):29-33.
202. Rokstad AM, Engedal K, Edvardsson D, Selbaek G. Psychometric evaluation of the Norwegian version of the Person-centred Care Assessment Tool. *International journal of nursing practice*. Feb 2012;18(1):99-105.
203. Edvardsson D, Fetherstonhaugh D, Nay R, Gibson S. Development and initial testing of the Person-centered Care Assessment Tool (P-CAT). *International psychogeriatrics / IPA*. Feb 2010;22(1):101-108.
204. Sjogren K, Lindkvist M, Sandman PO, Zingmark K, Edvardsson D. Psychometric evaluation of the Swedish version of the Person-Centered Care Assessment Tool (P-CAT). *International psychogeriatrics / IPA*. Mar 2012;24(3):406-415.
205. Nilsson A, Lindkvist M, Rasmussen BH, Edvardsson D. Measuring levels of person-centeredness in acute care of older people with cognitive impairment: evaluation of the POPAC scale. *BMC health services research*. 2013;13:327.
206. Edvardsson D, Nilsson A, Fetherstonhaugh D, Nay R, Crowe S. The person-centred care of older people with cognitive impairment in acute care scale (POPAC). *Journal of nursing management*. Jan 2013;21(1):79-86.
207. Bergland A, Kirkevold M, Edvardsson D. Psychometric properties of the Norwegian Person-centred Climate Questionnaire from a nursing home context. *Scandinavian journal of caring sciences*. Dec 2012;26(4):820-828.
208. Edvardsson D, Koch S, Nay R. Psychometric evaluation of the English Language Person-Centered Climate Questionnaire--Patient version. *Western journal of nursing research*. Mar 2009;31(2):235-244.
209. Edvardsson D, Koch S, Nay R. Psychometric evaluation of the English language Person-centred Climate Questionnaire--staff version. *Journal of nursing management*. Jan 2010;18(1):54-60.
210. Edvardsson D, Sandman PO, Rasmussen B. Swedish language Person-centred Climate Questionnaire - patient version: construction and psychometric evaluation. *Journal of advanced nursing*. Aug 2008;63(3):302-309.
211. Edvardsson D, Sandman PO, Rasmussen B. Construction and psychometric evaluation of the Swedish language Person-centred Climate Questionnaire - staff version. *Journal of nursing management*. Nov 2009;17(7):790-795.
212. Dow B, Fearn M, Haralambous B, Tinney J, Hill K, Gibson S. Development and initial testing of the Person-Centred Health Care for Older Adults Survey. *International psychogeriatrics / IPA*. Jul 2013;25(7):1065-1076.
213. White DL, Newton-Curtis L, Lyons KS. Development and initial testing of a measure of person-directed care. *The Gerontologist*. Jul 2008;48 Spec No 1:114-123.
214. Clark BE, Mount JK. Pharmacy Service Orientation: a measure of organizational culture in pharmacy practice sites. *Research in social & administrative pharmacy : RSAP*. Mar 2006;2(1):110-128.
215. Ryan ME, Collins FJ, Dowd JB, Pierce PK. Measuring patient satisfaction: a case study. *Journal of nursing care quality*. Jan 1995;9(2):44-53.
216. Wilde B, Larsson G, Larsson M, Starrin B. Quality of care. Development of a patient-centred questionnaire based on a grounded theory model. *Scandinavian journal of caring sciences*. 1994;8(1):39-48.
217. van Weert JC, Jansen J, de Bruijn GJ, Noordman J, van Dulmen S, Bensing JM. QUOTEchemo: a patient-centred instrument to measure quality of communication preceding chemotherapy treatment through the patient's eyes. *European journal of cancer (Oxford, England : 1990)*. Nov 2009;45(17):2967-2976.
218. Sulmasy DP, McIlvane JM, Pasley PM, Rahn M. A scale for measuring patient perceptions of the quality of end-of-life care and satisfaction with treatment: the reliability and validity of QUEST. *Journal of pain and symptom management*. Jun 2002;23(6):458-470.
219. Engelberg R, Downey L, Curtis JR. Psychometric characteristics of a quality of communication questionnaire assessing communication about end-of-life care. *Journal of palliative medicine*. Oct 2006;9(5):1086-1098.
220. Steinhauer KE, Voils CI, Bosworth H, Tulsky JA. Validation of a Measure of Family Experience of Patients With Serious Illness: The QUAL-E (Fam). *Journal of pain and symptom management*. May 22 2014.
221. Shelton RC, Winkel G, Davis SN, et al. Validation of the group-based medical mistrust scale among urban black men. *Journal of general internal medicine*. Jun 2010;25(6):549-555.
222. Gallagher TJ, Hartung PJ, Gregory SW. Assessment of a measure of relational communication for doctor-patient interactions. *Patient education and counseling*. Dec 1 2001;45(3):211-218.
223. Gallagher TJ, Hartung PJ, Gerzina H, Gregory SW, Jr, Merolla D. Further analysis of a doctor-patient nonverbal communication instrument. *Patient education and counseling*. Jun 2005;57(3):262-271.
224. Shea JA, Micco E, Dean LT, McMurphy S, Schwartz JS, Armstrong K. Development of a revised Health Care System Distrust scale. *Journal of general internal medicine*. Jun 2008;23(6):727-732.
225. Shields CG, Franks P, Fiscella K, Meldrum S, Epstein RM. Rochester Participatory Decision-Making Scale (RPAD): reliability and validity. *Annals of family medicine*. Sep-Oct 2005;3(5):436-442.
226. McGuire-Snieckus R, McCabe R, Catty J, Hansson L, Priebe S. A new scale to assess the therapeutic relationship in community mental health care: STAR. *Psychological medicine*. Jan 2007;37(1):85-95.
227. Campbell HS, Hall AE, Sanson-Fisher RW, Barker D, Turner D, Taylor-Brown J. Development and validation of the Short-Form Survivor Unmet Needs Survey (SF-SUNS). *Supportive care in cancer : official journal of the Multinational Association of Supportive Care in Cancer*. Apr 2014;22(4):1071-1079.
228. Campbell HS, Sanson-Fisher R, Turner D, Hayward L, Wang XS, Taylor-Brown J. Psychometric properties of cancer survivors' unmet needs survey. *Supportive care in cancer : official journal of the Multinational Association of Supportive Care in Cancer*. Feb 2010;19(2):221-230.
229. Hodgkinson K, Butow P, Hobbs KM, Hunt GE, Lo SK, Wain G. Assessing unmet supportive care needs in partners of cancer survivors: the development and evaluation of the Cancer Survivors' Partners Unmet Needs measure (CaSPUN). *Psycho-oncology*. Sep 2007;16(9):805-813.
230. Hodgkinson K, Butow P, Hunt GE, et al. The development and evaluation of a measure to assess cancer survivors' unmet supportive care needs: the CaSUN (Cancer Survivors' Unmet Needs measure). *Psycho-oncology*. Sep 2007;16(9):796-804.
231. Zwart DL, Langelaa M, van de Vooren RC, et al. Patient safety culture measurement in general practice. Clinimetric properties of 'SCOPE'. *BMC family practice*. 2011;12:117.
232. Mack JW, Block SD, Nilsson M, et al. Measuring therapeutic alliance between oncologists and patients with advanced cancer: the Human Connection Scale. *Cancer*. Jul 15 2009;115(14):3302-3311.
233. Pinosof WM, Zinbarg R, Knobloch-Fedders LM. Factorial and construct validity of the revised short form integrative psychotherapy alliance scales for family, couple, and individual therapy. *Family process*. Sep 2008;47(3):281-301.
234. Radwin LE, Cabral HJ. Trust in Nurses Scale: construct validity and internal reliability evaluation. *Journal of advanced nursing*. Mar 2010;66(3):683-689.
235. Radwin LE, Washko M, Suchy KA, Tyman K. Development and pilot testing of four desired health outcomes scales. *Oncology nursing forum*. Jan 2005;32(1):92-96.
236. Hillen MA, Koning CC, Wilink JW, et al. Assessing cancer patients' trust in their oncologist: development and validation of the Trust in Oncologist Scale (TiOS). *Supportive care in cancer : official journal of the Multinational Association of Supportive Care in Cancer*. Aug 2012;20(8):1787-1795.
237. Anderson LA, Dedrick RF. Development of the Trust in Physician scale: a measure to assess interpersonal trust in patient-physician relationships. *Psychological reports*. Dec 1990;67(3 Pt 2):1091-1100.
238. Freburger JK, Callahan LF, Currey SS, Anderson LA. Use of the Trust in Physician Scale in patients with rheumatic disease: psychometric properties and correlates of trust in the rheumatologist. *Arthritis and rheumatism*. Feb 15 2003;49(1):51-58.
239. Thom DH, Ribisl KM, Stewart AL, Luke DA. Further validation and reliability testing of the Trust in Physician Scale. The Stanford Trust Study Physicians. *Medical care*. May 1999;37(5):510-517.
240. Hall MA, Camacho F, Dugan E, Balkrishnan R. Trust in the medical profession: conceptual and measurement issues. *Health services research*. Oct 2002;37(5):1419-1439.
241. Tucker CM, Mirsu-Paun A, Van den Berg JJ, et al. Assessments for measuring patient-centered cultural sensitivity in community-based primary care clinics. *Journal of the National Medical Association*. Jun 2007;99(6):609-619.
242. Mirsu-Paun A, Tucker CM, Herman KC, Hernandez CA. Validation of a provider self-report inventory for measuring patient-centered cultural sensitivity in health care using a sample of medical students. *Journal of community health*. Apr 2010;35(2):198-207.
243. Adams R, Price K, Tucker G, Nguyen AM, Wilson D. The doctor and the patient--how is a clinical encounter perceived? *Patient education and counseling*. Jan 2012;86(1):127-133.
244. Ouwens M, Hermens R, Hulscher M, et al. Development of indicators for patient-centred cancer care. *Supportive care in cancer : official journal of the Multinational Association of Supportive Care in Cancer*. Jan 2010;18(1):121-130.
245. Shields L, Tanner A. Pilot study of a tool to investigate perceptions of family-centered care in different care settings. *Pediatric nursing*. May-Jun 2004;30(3):189-197.
246. Sidani S. Effects of patient-centered care on patient outcomes: an evaluation. *Research and theory for nursing practice*. 2008;22(1):24-37.
247. Straten GF, Friele RD, Groenewegen PP. Public trust in Dutch health care. *Social science & medicine (1982)*. Jul 2002;55(2):227-234.
248. Van den Broeck U, Spiessens C, Dancet E, et al. Patient evaluation of infertility management in an ISO 9001:2008-certified centre for reproductive medicine. *Reproductive biomedicine online*. Mar 2012;24(3):293-300.
249. Grol R, de Maeseneer J, Whitfield M, Mokkink H. Disease-centred versus patient-centred attitudes: comparison of general practitioners in Belgium, Britain and The Netherlands. *Family practice*. Jun 1990;7(2):100-103.
250. Kelly JJ, Njuki F, Lane PL, McKinley RK. Design of a questionnaire to measure trust in an emergency department. *Academic emergency medicine : official journal of the Society for Academic Emergency Medicine*. Feb 2005;12(2):147-151.
251. Leisen B, Hyman MR. An improved scale for assessing patients' trust in their physician. *Health marketing quarterly*. 2001;19(1):23-42.
252. Little P, Everitt H, Williamson I, et al. Observational study of effect of patient centredness and positive approach on outcomes of general practice consultations. *BMJ (Clinical research ed)*. Oct 20 2001;323(7318):908-911.
253. Thom DH, Wong ST, Guzman D, et al. Physician trust in the patient: development and validation of a new measure. *Annals of family medicine*. Mar-Apr 2011;9(2):148-154.
254. Zhang XH, Jin J, Ngorsurachet S, Li SC. Development and validation of a scale to measure patients' trust in pharmacists in Singapore. *Patient preference and adherence*. 2009;3:1-7.

255. Saturno PJ, Martinez-Nicolas I, Robles-Garcia IS, Lopez-Soriano F, Angel-Garcia D. Development and pilot test of a new set of good practice indicators for chronic cancer pain management. *European journal of pain (London, England)*. Jan 2015;19(1):28-38.
256. Hiidenhovi H, Laippala P, Nojonen K. Development of a patient-orientated instrument to measure service quality in outpatient departments. *Journal of advanced nursing*. Jun 2001;34(5):696-705.
257. Shelef K, Diamond GM. Short form of the revised Vanderbilt therapeutic alliance scale: development, reliability, and validity. *Psychotherapy research : journal of the Society for Psychotherapy Research*. Jul 2008;18(4):433-443.
258. Del Piccolo L, Mead N, Gask L, et al. The English version of the Verona medical interview classification system (VR-MICS). An assessment of its reliability and a comparative cross-cultural test of its validity. *Patient education and counseling*. Sep 2005;58(3):252-264.
259. Bachinger SM, Kolk AM, Smets EM. Patients' trust in their physician--psychometric properties of the Dutch version of the "Wake Forest Physician Trust Scale". *Patient education and counseling*. Jul 2009;76(1):126-131.
260. Hall MA, Zheng B, Dugan E, et al. Measuring patients' trust in their primary care providers. *Medical care research and review : MCRR*. Sep 2002;59(3):293-318.
261. Hatcher RL, Gillaspay JA. Development and validation of a revised short version of the Working Alliance Inventory. *Psychotherapy Research*. 2006;16(1):12-25.
262. Burge F, Haggerty JL, Pineault R, et al. Relational continuity from the patient perspective: comparison of primary healthcare evaluation instruments. *Healthcare policy = Politiques de sante*. Dec 2011;7(Spec Issue):124-138.
263. Pezzolesi C, Manser T, Schifano F, et al. Human factors in clinical handover: development and testing of a 'handover performance tool' for doctors' shift handovers. *International journal for quality in health care : journal of the International Society for Quality in Health Care / ISQua*. Feb 2013;25(1):58-65.
264. Baggs JG. Development of an instrument to measure collaboration and satisfaction about care decisions. *Journal of advanced nursing*. Jul 1994;20(1):176-182.
265. Cooper S, Cant R, Porter J, et al. Rating medical emergency teamwork performance: development of the Team Emergency Assessment Measure (TEAM). *Resuscitation*. Apr 2010;81(4):446-452.
266. Temkin-Greener H, Gross D, Kunitz SJ, Mukamel D. Measuring interdisciplinary team performance in a long-term care setting. *Medical care*. May 2004;42(5):472-481.
267. Damman OC, Hendriks M, Sixma HJ. Towards more patient centred healthcare: A new Consumer Quality Index instrument to assess patients' experiences with breast care. *European journal of cancer (Oxford, England : 1990)*. Jun 2009;45(9):1569-1577.
268. Beehler GP, Funderburk JS, Possemato K, Dollar KM. Psychometric assessment of the Primary Care Behavioral Health Provider Adherence Questionnaire (PPAQ). *Translational behavioral medicine*. Dec 2013;3(4):379-391.
269. Nuno-Solinis R, Berraondo Zabalegui I, Sauto Arce R, San Martin Rodriguez L, Toro Polanco N. Development of a questionnaire to assess interprofessional collaboration between two different care levels. *International journal of integrated care*. Apr 2013;13:e015.
270. Barkham M, Agnew RM, Culverwell A. The California Psychotherapy Alliance Scales: a pilot study of dimensions and elements. *The British journal of medical psychology*. Jun 1993;66 ( Pt 2):157-165.
271. Bale R, Catty J, Watt H, Greenwood N, Burns T. Measures of the therapeutic relationship in severe psychotic illness: a comparison of two scales. *The International journal of social psychiatry*. May 2006;52(3):256-266.
272. Nie Y, Mao X, Cui H, He S, Li J, Zhang M. Hospital survey on patient safety culture in China. *BMC health services research*. 2013;13:228.
273. Haggerty JL, Levesque JF, Santor DA, et al. Accessibility from the patient perspective: comparison of primary healthcare evaluation instruments. *Healthcare policy = Politiques de sante*. Dec 2011;7(Spec Issue):94-107.
274. Jones J, Barry MM. Developing a scale to measure synergy in health promotion partnerships. *Global health promotion*. Jun 2011;18(2):36-44.
275. Cramm JM, Strating MM, Tsiachristas A, Nieboer AP. Development and validation of a short version of the Assessment of Chronic Illness Care (ACIC) in Dutch disease management programs. *Health and quality of life outcomes*. 2011;9:49.
276. Browne G, Roberts J, Gafni A, Byrne C, Kertyzia J, Loney P. Conceptualizing and validating the human services integration measure. *International journal of integrated care*. 2004;4:e03.
277. Cooley WC, McAllister JW, Sherrieb K, Clark RE. The Medical Home Index: development and validation of a new practice-level measure of implementation of the Medical Home model. *Ambulatory pediatrics : the official journal of the Ambulatory Pediatric Association*. Jul-Aug 2003;3(4):173-180.
278. Cassidy CE, Starfield B, Hurtado MP, Berk RA, Nanda JP, Friedenberg LA. Measuring consumer experiences with primary care. *Pediatrics*. Apr 2000;105(4 Pt 2):998-1003.
279. Paulo de Almeida Tavares J, Leite da Silva A, Sa-Couto P, Boltz M, Capezuti E. Validation of geriatric care environment scale in portuguese nurses. *Current gerontology and geriatrics research*. 2013;2013:426596.
280. Ahgren B, Axelsson R. Evaluating integrated health care: a model for measurement. *International journal of integrated care*. 2005;5:e01; discussion e03, e09.
281. Haggerty JL, Roberge D, Freeman GK, Beaulieu C, Breton M. Validation of a generic measure of continuity of care: when patients encounter several clinicians. *Annals of family medicine*. Sep-Oct 2012;10(5):443-451.
282. Block M, Ehrenworth JF, Cuce VM, et al. Measuring handoff quality in labor and delivery: development, validation, and application of the Coordination of Handoff Effectiveness Questionnaire (CHEQ). *Joint Commission journal on quality and patient safety / Joint Commission Resources*. May 2013;39(5):213-220.
283. Aller MB, Vargas I, Garcia-Subirats I, et al. A tool for assessing continuity of care across care levels: an extended psychometric validation of the CCAENA questionnaire. *International journal of integrated care*. 2013;13:e050.
284. Horwitz LI, Dombroski J, Murphy TE, Farnan JM, Johnson JK, Arora VM. Validation of a handoff assessment tool: the Handoff CEX. *Journal of clinical nursing*. May 2013;22(9-10):1477-1486.
285. Horwitz LI, Rand D, Staisiunas P, et al. Development of a handoff evaluation tool for shift-to-shift physician handoffs: the Handoff CEX. *Journal of hospital medicine : an official publication of the Society of Hospital Medicine*. Apr 2013;8(4):191-200.
286. Hadjistavropoulos HD, Biem HJ, Kowalyk KM. Measurement of continuity of care in cardiac patients: reliability and validity of an in-person questionnaire. *The Canadian journal of cardiology*. Jul 2004;20(9):883-891.
287. Taylor C, Brown K, Lamb B, Harris J, Sevdalis N, Green JS. Developing and testing TEAM (Team Evaluation and Assessment Measure), a self-assessment tool to improve cancer multidisciplinary teamwork. *Annals of surgical oncology*. Dec 2012;19(13):4019-4027.
288. Bonomi AE, Wagner EH, Glasgow RE, VonKorff M. Assessment of chronic illness care (ACIC): a practical tool to measure quality improvement. *Health services research*. Jun 2002;37(3):791-820.
289. Kim H, Capezuti E, Boltz M, Fairchild S, Fulmer T, Mezey M. Factor structure of the geriatric care environment scale. *Nursing research*. Sep-Oct 2007;56(5):339-347.
290. Batterham R, Southern D, Appleby N, et al. Construction of a GP integration model. *Social science & medicine (1982)*. Apr 2002;54(8):1225-1241.
291. Glasgow RE, Wagner EH, Schaefer J, Mahoney LD, Reid RJ, Greene SM. Development and validation of the Patient Assessment of Chronic Illness Care (PACIC). *Medical care*. May 2005;43(5):436-444.
292. Singer SJ, Friedberg MW, Kiang MV, Dunn T, Kuhn DM. Development and preliminary validation of the Patient Perceptions of Integrated Care survey. *Medical care research and review : MCRR*. Apr 2013;70(2):143-164.
293. Uyei J, Coetzee D, Macinko J, Weinberg SL, Guttmacher S. Measuring the degree of integrated tuberculosis and HIV service delivery in Cape Town, South Africa. *Health policy and planning*. Jan 2014;29(1):42-55.
294. Zineldin M, Camgoz-Akdag H, Vasicheva V. Measuring, evaluating and improving hospital quality parameters/dimensions--an integrated healthcare quality approach. *International journal of health care quality assurance*. 2011;24(8):654-662.
295. Lukas CV, Meterko M, Lowcock S, et al. Monitoring the progress of system integration. *Quality management in health care*. Winter 2002;10(2):1-11.
296. Briner M, Kessler O, Pfeiffer Y, Wehner T, Manser T. Assessing hospitals' clinical risk management: Development of a monitoring instrument. *BMC health services research*. 2010;10:337.
297. O'Rourke N, Chappell NL, Caspar S. Measurement and analysis of individualized care inventory responses comparing long-term care nurses and care aides. *The Gerontologist*. Dec 2009;49(6):839-846.
298. Korner M, Wirtz MA. Development and psychometric properties of a scale for measuring internal participation from a patient and health care professional perspective. *BMC health services research*. 2013;13:374.
299. Egede LE, Ellis C. Development and testing of the Multidimensional Trust in Health Care Systems Scale. *Journal of general internal medicine*. Jun 2008;23(6):808-815.
300. Safran DG, Kosinski M, Tarlov AR, et al. The Primary Care Assessment Survey: tests of data quality and measurement performance. *Medical care*. May 1998;36(5):728-739.
